# Supplementary material for: HIF-Dependent NFATC1 Activation Upregulates ITGA5 and PLAUR in Intestinal Epithelium in Inflammatory Bowel Disease
Source: Front Genet. 2021 Nov 11;12:791640. doi: 10.3389/fgene.2021.791640 (PMC8632048; doi:10.3389/fgene.2021.791640)
Supplement: Supplementary file 2 [file Table1.XLSX]

## Sheet: dCaco-2_OD
The full list of differentially expressed genes in differentiated Caco-2 cells upon oxyquinoline derivative treatment.
Gene Symbol	baseMean	log2FoldChange	lfcSE	stat	pvalue	padj
NXPE1	5.30429	4.86924	1.42356	3.42048	0.000625115	0.00244225
SLC39A2	9.2066	4.778	1.1822	4.04162	5.30832e-05	0.000260881
NRN1	18.0949	4.75411	0.840878	5.65374	1.56991e-08	1.37863e-07
C4orf47	12.2177	4.59348	0.989445	4.64248	3.44252e-06	2.09832e-05
GAST	4.31209	4.55689	1.48227	3.07427	0.00211021	0.00723522
AQP10	570.032	4.24745	0.416084	10.2082	1.82274e-24	7.10908e-23
BMP6	38.0148	4.0981	0.51287	7.99053	1.3436e-15	2.59801e-14
ITGA5	531.077	3.87376	0.140793	27.5139	1.19624e-166	1.04198e-163
SCN5A	138.787	3.75621	0.251648	14.9265	2.21752e-50	3.0964e-48
ANKRD37	79.1874	3.65271	0.323335	11.297	1.35795e-29	7.43701e-28
GNG3	6.21071	3.53018	1.10032	3.20831	0.00133516	0.00481045
PPFIA4	345.912	3.51032	0.166534	21.0787	1.24778e-98	4.22674e-96
ENPP2	3.71665	3.43611	1.41336	2.43116	0.0150504	0.039726
PDE2A	11.0791	3.36857	0.819214	4.11195	3.92328e-05	0.000197808
CBFA2T3	40.1928	3.34638	0.441949	7.57186	3.67919e-14	6.27211e-13
PFKFB4	1480.01	3.30809	0.100541	32.9029	1.99907e-237	4.06299e-234
CHST7	75.9298	3.26863	0.314768	10.3842	2.9247e-25	1.18622e-23
SLC2A3	26883.5	3.2576	0.0888792	36.652	4.25001e-294	1.94353e-290
ENO2	1438.01	3.24679	0.0958065	33.889	9.67084e-252	2.52713e-248
HK2	2472.26	3.20959	0.0844385	38.011	0	0
PFKP	1659.87	3.05606	0.0969119	31.5344	2.93499e-218	4.12976e-215
SPAG4	473.558	3.04425	0.141177	21.5633	3.9716e-103	1.48262e-100
ARHGAP45	935.302	3.03125	0.112875	26.8549	7.38542e-159	5.62892e-156
EMP1	2853.76	3.0228	0.0870768	34.7142	4.80416e-264	1.75756e-260
CTNNA3	4.37387	2.99207	1.18342	2.52833	0.0114606	0.0314724
SLC6A8	878.507	2.9832	0.118378	25.2006	3.94801e-140	2.6747e-137
AQP12B	8.30336	2.92938	0.891849	3.28462	0.00102121	0.00378904
CKB	25333.5	2.91224	0.0704007	41.3667	0	0
TBX15	10.3739	2.81319	0.767095	3.66733	0.000245094	0.00105549
GABRD	5.12522	2.78678	1.09807	2.53788	0.0111525	0.0307416
PDK1	1411.9	2.78504	0.0919977	30.2729	2.60928e-201	3.18193e-198
PCK1	188.179	2.77784	0.192414	14.4368	3.03784e-47	3.88588e-45
SLC2A1	9973.59	2.77534	0.064748	42.8638	0	0
GPRC5A	6968.5	2.76038	0.0825196	33.4512	2.47215e-245	5.65257e-242
TNNI2	60.6687	2.75231	0.342223	8.04244	8.80669e-16	1.75673e-14
DUSP5	1045.14	2.75029	0.111265	24.7183	6.79551e-135	4.43941e-132
BNIP3	2431.91	2.7268	0.0986932	27.6291	4.98261e-168	4.55709e-165
TFAP2C	465.225	2.71636	0.143767	18.8941	1.27537e-79	3.19577e-77
KIAA0319	263.561	2.70911	0.167221	16.2008	4.98008e-59	8.28143e-57
ZDHHC11B	4.75898	2.67144	1.09528	2.43904	0.0147262	0.0389942
ATP8B2	442.991	2.66236	0.149699	17.7848	9.26874e-71	1.94878e-68
WNT9A	27.2006	2.65797	0.459084	5.78973	7.04992e-09	6.48678e-08
P4HA1	7009.9	2.65731	0.0822803	32.2958	8.01537e-229	1.46617e-225
APOBEC1	14.4814	2.65583	0.646574	4.10754	3.99896e-05	0.000200793
TMEM145	28.3139	2.65235	0.472149	5.61761	1.9362e-08	1.67288e-07
SLC16A3	304.4	2.62374	0.156373	16.7787	3.49255e-63	6.2025e-61
LIMCH1	171.678	2.58732	0.190611	13.5738	5.72806e-42	6.12735e-40
LDHA	26906.5	2.53709	0.0809859	31.3275	1.96981e-215	2.5737e-212
FOSB	13.6184	2.53534	0.743789	3.40868	0.000652782	0.00253787
LOX	399.689	2.52278	0.131884	19.1288	1.45359e-81	3.91015e-79
MAFF	276.228	2.51621	0.178733	14.078	5.18576e-45	6.08064e-43
GBE1	434.51	2.50883	0.129614	19.3562	1.80584e-83	5.00493e-81
FXYD5	520.042	2.5023	0.118612	21.0966	8.55493e-99	2.95258e-96
CALCR	6.48546	2.49384	0.912841	2.73195	0.00629599	0.0188057
CXCR4	19.0442	2.48275	0.549206	4.52062	6.16586e-06	3.60915e-05
LRRC49	12.523	2.48057	0.6775	3.66136	0.000250879	0.00107902
NDRG1	14086	2.47973	0.0728819	34.0239	9.86072e-254	3.00621e-250
UPK1A	6.45166	2.45337	0.930393	2.63692	0.00836625	0.0240395
ALDOA	190.233	2.45187	0.245599	9.98321	1.80528e-23	6.48767e-22
CEACAM1	1741.05	2.42153	0.0853475	28.3726	4.40687e-177	4.74179e-174
PLOD2	4795.26	2.3947	0.0749693	31.9425	6.87767e-224	1.14369e-220
DDIT4	381.178	2.37942	0.135706	17.5336	7.93925e-69	1.59588e-66
CLC	11.1949	2.36555	0.723823	3.26814	0.00108257	0.00399403
INHA	77.518	2.36225	0.284033	8.31682	9.03529e-17	1.95822e-15
SCN1B	65.9329	2.35192	0.289462	8.12515	4.46803e-16	9.17275e-15
RNF183	74.9836	2.34321	0.271165	8.64127	5.55903e-18	1.31396e-16
RHBDL3	6.90497	2.29297	0.896752	2.55697	0.0105589	0.0293443
GCNT3	375.625	2.28364	0.184521	12.376	3.52278e-35	2.71893e-33
EBF2	16.7837	2.26246	0.557442	4.05866	4.93559e-05	0.000244005
EGLN1	138.982	2.26198	0.21078	10.7315	7.24302e-27	3.22358e-25
GABRA2	309.056	2.25484	0.171283	13.1644	1.4067e-39	1.33323e-37
ST8SIA6	22.4705	2.25107	0.506539	4.44403	8.82905e-06	5.014e-05
EEF1A2	67.9896	2.24459	0.276965	8.10425	5.30702e-16	1.08103e-14
N4BP3	180.798	2.23852	0.179559	12.4667	1.13376e-35	8.97778e-34
DUSP4	87.1858	2.23731	0.269999	8.28637	1.16752e-16	2.50661e-15
FUT11	419.774	2.23496	0.132318	16.8908	5.25935e-64	9.6204e-62
FOS	188.285	2.23155	0.187628	11.8935	1.27935e-32	8.29856e-31
RNF223	6.54929	2.22412	0.889281	2.50103	0.0123833	0.0336127
PDLIM3	19.0066	2.21114	0.526797	4.19732	2.70089e-05	0.000141318
PAM	4150.32	2.20366	0.0761347	28.9442	3.32345e-184	3.79954e-181
ATF3	195.52	2.20125	0.198437	11.093	1.35728e-28	6.8584e-27
GDF15	295.894	2.19258	0.150766	14.543	6.47315e-48	8.39765e-46
BHLHE40	1167.45	2.18762	0.102993	21.2405	4.03934e-100	1.42091e-97
SLC2A14	810.217	2.15734	0.135452	15.927	4.11689e-57	6.66426e-55
LHX2	14.7634	2.15232	0.606205	3.55048	0.000384531	0.00158866
UGT1A1	7.83519	2.14921	0.805586	2.66789	0.00763304	0.0222118
BRICD5	24.5909	2.13744	0.480616	4.44729	8.69598e-06	4.94765e-05
EPHA2	726.185	2.10399	0.104995	20.0389	2.52526e-89	7.57247e-87
LGI4	1009.45	2.0925	0.120231	17.404	7.69568e-68	1.49755e-65
PNCK	32.4161	2.09186	0.399518	5.23596	1.64133e-07	1.23654e-06
RPE65	9.36969	2.08666	0.736856	2.83184	0.00462813	0.0143902
S100G	42.7576	2.08038	0.366612	5.6746	1.39011e-08	1.23078e-07
APLP1	44.4795	2.0794	0.348036	5.97466	2.30575e-09	2.26028e-08
FCHO1	12.7235	2.07688	0.639296	3.2487	0.00115935	0.00424474
AC093512.2	15.3134	2.05757	0.580018	3.54741	0.000389032	0.00160491
ERO1A	3975.94	2.05659	0.0747741	27.504	1.57111e-166	1.3063e-163
GLIPR2	7.42341	2.0367	0.828974	2.45689	0.0140146	0.0373422
GPR37L1	7.29087	2.03252	0.837958	2.42556	0.0152848	0.0402461
TEX29	8.01062	2.01864	0.828835	2.43551	0.0148708	0.0393316
SORL1	9417.32	2.01571	0.0635534	31.7167	9.13056e-221	1.3918e-217
CDT1	918.453	2.00615	0.0953544	21.0388	2.89425e-98	9.62575e-96
PGK1	14864.8	1.99499	0.074543	26.7629	8.72973e-158	6.38737e-155
DUSP8	157.38	1.99411	0.19346	10.3076	6.51151e-25	2.5837e-23
SLC15A1	835.929	1.99094	0.0948898	20.9816	9.65909e-98	3.15507e-95
CCL20	60.7062	1.9783	0.292915	6.75385	1.43976e-11	1.85596e-10
NR4A1	259.574	1.9685	0.148089	13.2927	2.55214e-40	2.50988e-38
INSIG2	982.364	1.96203	0.089371	21.9538	7.96933e-107	3.31307e-104
ULBP2	164.382	1.9618	0.196446	9.98643	1.74768e-23	6.29304e-22
LVRN	10.2563	1.95431	0.734004	2.66252	0.00775568	0.0225318
SERPINB6	2047.95	1.94156	0.0828786	23.4266	2.29088e-121	1.07448e-118
FAM13A	1892.36	1.93838	0.0817602	23.7081	2.97397e-124	1.59999e-121
PPBP	28.2893	1.93454	0.423935	4.56329	5.03575e-06	2.98834e-05
P4HA2	1946.64	1.92785	0.079803	24.1576	6.21085e-129	3.78696e-126
ENO1	20610.5	1.92374	0.0681912	28.2109	4.29634e-175	4.36604e-172
PLAC8	306.35	1.92247	0.136199	14.1152	3.06338e-45	3.66245e-43
B3GNT4	13.5123	1.91377	0.632746	3.02455	0.00249007	0.00836365
PAG1	4699.44	1.90725	0.0813622	23.4415	1.61441e-121	7.77124e-119
LGALS14	1789.55	1.9072	0.121015	15.76	5.86294e-56	9.01217e-54
FOSL1	31.7774	1.89835	0.396218	4.79118	1.65803e-06	1.06866e-05
TG	134.294	1.88989	0.199871	9.45556	3.21289e-21	9.77873e-20
PPP1R15A	2663.11	1.88671	0.0821768	22.9592	1.19314e-116	5.19642e-114
LRP4	1241.54	1.88434	0.0838535	22.4719	7.82548e-112	3.32892e-109
SLC2A5	425.239	1.86929	0.148653	12.5749	2.90302e-36	2.32904e-34
SYT8	213.149	1.86643	0.184699	10.1053	5.23468e-24	1.95414e-22
PITPNC1	25.8496	1.85651	0.482766	3.84556	0.000120278	0.000553062
KDM3A	4527.55	1.84974	0.0795014	23.2668	9.62749e-120	4.29527e-117
STC2	3393.08	1.84676	0.0784716	23.5341	1.82703e-122	9.54858e-120
TNFRSF10D	932.439	1.84361	0.100042	18.4284	7.7797e-76	1.80134e-73
MTFP1	14.8583	1.84342	0.562199	3.27895	0.00104194	0.00385347
EFNA3	67.918	1.84153	0.277443	6.63749	3.19072e-11	3.91746e-10
RHOF	54.3679	1.83119	0.320632	5.7112	1.12183e-08	1.00591e-07
SHH	88.6212	1.82264	0.260163	7.00576	2.4565e-12	3.48328e-11
ETV5	106.209	1.82256	0.227019	8.02824	9.88805e-16	1.94696e-14
BNIP5	154.023	1.81711	0.185589	9.79103	1.23034e-22	4.12185e-21
C17orf78	14.5375	1.79599	0.590643	3.04074	0.00236	0.00797213
KCNA7	24.7406	1.77709	0.456765	3.89061	9.99926e-05	0.000466717
ASNS	21.5503	1.77707	0.475725	3.73549	0.00018735	0.000829123
SYBU	497.807	1.7753	0.127118	13.9658	2.51958e-44	2.91697e-42
TCAF2	10.2457	1.77058	0.708115	2.50041	0.0124051	0.0336569
KIF1A	194.26	1.76964	0.171533	10.3166	5.92795e-25	2.35952e-23
ALDOC	2076.96	1.76742	0.0755726	23.387	5.79737e-121	2.65114e-118
GPR157	1289.11	1.76662	0.0931689	18.9614	3.5522e-80	9.02455e-78
MICB	80.8108	1.76402	0.25268	6.98125	2.92557e-12	4.11334e-11
TK1	1457.78	1.75574	0.0902183	19.461	2.34968e-84	6.61237e-82
UBASH3B	133.925	1.74551	0.206495	8.45305	2.83802e-17	6.3541e-16
SLC36A1	4783.77	1.73976	0.0714852	24.3374	7.88096e-131	4.97098e-128
KLF4	428.792	1.73836	0.121938	14.256	4.11276e-46	4.98216e-44
BNIP3L	1536.96	1.73114	0.0894396	19.3554	1.83433e-83	5.00799e-81
PLB1	283.459	1.72549	0.139544	12.3652	4.03156e-35	3.09854e-33
DDIT4L	25.5897	1.71444	0.441446	3.88369	0.000102881	0.000479223
PLAUR	58.8717	1.71109	0.289545	5.90956	3.43015e-09	3.28676e-08
PHLDA2	37.5581	1.70742	0.361719	4.72028	2.35516e-06	1.47083e-05
PLK3	52.9044	1.70174	0.308595	5.51446	3.49844e-08	2.92075e-07
TUBA1A	37.3544	1.70041	0.368338	4.61643	3.90407e-06	2.35454e-05
PMEPA1	41.3326	1.69505	0.353167	4.79957	1.59006e-06	1.02848e-05
TNFSF9	11.1761	1.6912	0.669738	2.52517	0.0115643	0.0317285
MRPS26	1543.5	1.6842	0.0821077	20.512	1.68159e-93	5.21348e-91
CEACAM6	1921.97	1.68064	0.0852583	19.7123	1.69133e-86	4.91075e-84
SETBP1	275.827	1.67995	0.140847	11.9275	8.51245e-33	5.60107e-31
GPI	6364.07	1.67472	0.0601961	27.821	2.41531e-170	2.32531e-167
HYAL3	88.1795	1.67434	0.240269	6.96862	3.20059e-12	4.46909e-11
CREB5	50.8116	1.67163	0.309586	5.39958	6.67983e-08	5.3591e-07
ZG16	422.105	1.67076	0.137105	12.186	3.69319e-34	2.6389e-32
B3GNT7	78.4522	1.66201	0.253943	6.54481	5.95691e-11	7.10325e-10
RTN4R	185.188	1.66079	0.19708	8.42698	3.5471e-17	7.87421e-16
CSPG5	21.5297	1.65023	0.472579	3.49197	0.000479481	0.00192635
GRIN3B	12.2182	1.6468	0.677726	2.42989	0.0151034	0.0398144
PFKFB3	1234.12	1.63927	0.0873413	18.7685	1.3658e-78	3.33108e-76
MYBL2	3465.49	1.63546	0.0688852	23.7419	1.3323e-124	7.38498e-122
DUSP1	292.36	1.63158	0.139222	11.7193	1.01514e-31	6.33751e-30
TINAGL1	716.442	1.62895	0.11187	14.5611	4.96816e-48	6.49126e-46
TNFAIP8	242.477	1.62069	0.153718	10.5433	5.45615e-26	2.29434e-24
TPPP	21.3767	1.61516	0.486429	3.32045	0.000898723	0.00338539
PDE10A	101.48	1.61011	0.260592	6.17864	6.46559e-10	6.8245e-09
E2F7	295.439	1.60969	0.145611	11.0547	2.07981e-28	1.03662e-26
GJB3	15.4335	1.60677	0.584586	2.74856	0.00598574	0.0179877
CEACAM5	605.196	1.60455	0.105643	15.1884	4.21853e-52	5.9818e-50
ABCG2	277.847	1.60425	0.150552	10.6558	1.63868e-26	7.10302e-25
NR1D1	204.59	1.60039	0.161448	9.9127	3.66617e-23	1.2847e-21
RHPN2	1802.25	1.59554	0.0883865	18.0519	7.6236e-73	1.70062e-70
NXPH4	23.998	1.59532	0.482821	3.30416	0.000952631	0.00356715
HIVEP2	212.869	1.59481	0.157622	10.118	4.59797e-24	1.73058e-22
STON2	368.843	1.59293	0.129582	12.2928	9.90595e-35	7.36584e-33
SLC4A3	34.313	1.58844	0.383708	4.13971	3.47752e-05	0.000177389
CEACAM7	63.7284	1.5884	0.28576	5.5585	2.72109e-08	2.3001e-07
MAPT	23.2481	1.58215	0.441816	3.58102	0.000342259	0.00142904
BAAT	26.5666	1.5817	0.449407	3.51953	0.000432307	0.0017614
LDLR	3845.8	1.58131	0.067283	23.5023	3.86042e-122	1.90851e-119
RASSF1	394.512	1.58004	0.123982	12.7441	3.36328e-37	2.79641e-35
JUN	351.151	1.57778	0.128784	12.2514	1.65222e-34	1.21375e-32
TSC22D2	1249.21	1.57616	0.0827345	19.0509	6.463e-81	1.68887e-78
OXT	19.3122	1.57558	0.493083	3.19537	0.0013965	0.00500976
EFNA1	3213.38	1.57264	0.0874898	17.9751	3.05356e-72	6.49484e-70
PVR	4213.99	1.56743	0.065795	23.823	1.93089e-125	1.10374e-122
ZNF367	293.98	1.56406	0.14747	10.606	2.79493e-26	1.1973e-24
GAPDH	33731.5	1.56177	0.0616035	25.352	8.54795e-142	6.01381e-139
SLC20A1	2464.2	1.56087	0.0904183	17.2628	8.96532e-67	1.72625e-64
TERT	13.5471	1.55085	0.5845	2.6533	0.00797094	0.0230813
HILPDA	301.194	1.54954	0.139095	11.1401	8.0018e-29	4.09997e-27
STYK1	47.4145	1.54718	0.318507	4.8576	1.18816e-06	7.84614e-06
IGSF11	12.599	1.54367	0.648641	2.37985	0.0173197	0.0446905
CSRNP1	438.357	1.54218	0.124119	12.425	1.91135e-35	1.507e-33
B3GALT5	229.124	1.54076	0.152519	10.1021	5.40672e-24	2.00608e-22
OPTN	3539.91	1.53895	0.0978432	15.7287	9.61379e-56	1.46546e-53
GADD45A	411.885	1.53733	0.141193	10.8881	1.31324e-27	6.19118e-26
MMP1	725.814	1.53357	0.114705	13.3697	9.09619e-41	9.09221e-39
AKAP7	2428.74	1.53321	0.0741497	20.6772	5.55635e-95	1.75236e-92
AIF1	47.2919	1.5277	0.312126	4.89448	9.85677e-07	6.59473e-06
FAM114A1	847.187	1.5254	0.1069	14.2695	3.39092e-46	4.13512e-44
SLA	41.6612	1.5189	0.35667	4.25855	2.05753e-05	0.000110016
KRT20	160.905	1.51626	0.175767	8.62655	6.32324e-18	1.48669e-16
GOLGA8A	735.1	1.51458	0.0954297	15.8712	1.00376e-56	1.61059e-54
JUNB	195.637	1.51052	0.165873	9.10647	8.51043e-20	2.34447e-18
MT2A	109.94	1.51012	0.265241	5.69339	1.24545e-08	1.10968e-07
RNF19B	573.269	1.50809	0.108762	13.8659	1.01923e-43	1.17256e-41
HAS3	62.5103	1.50783	0.282102	5.34497	9.04336e-08	7.09353e-07
GPX3	2709.09	1.50778	0.0695223	21.6877	2.68349e-104	1.02263e-101
SLC11A2	5982.93	1.50484	0.0742579	20.265	2.61704e-91	7.97847e-89
CLIC5	1994.41	1.50026	0.0748739	20.0372	2.6111e-89	7.7036e-87
KCNJ14	22.8377	1.49922	0.458954	3.26659	0.00108849	0.00401345
E2F2	244.566	1.49302	0.155743	9.58641	9.12024e-22	2.88629e-20
GPA33	481.147	1.48815	0.130435	11.4091	3.76595e-30	2.13272e-28
MXI1	1029.91	1.47431	0.0974531	15.1284	1.05284e-51	1.48143e-49
GJB2	16.1085	1.47102	0.564246	2.60705	0.0091326	0.0259038
AP003071.5	44.9895	1.46952	0.330586	4.44519	8.78135e-06	4.98846e-05
MTHFD2	2159.52	1.46913	0.0863066	17.0223	5.61593e-65	1.05904e-62
RTL5	14.0781	1.46627	0.564566	2.59717	0.00939966	0.0265789
DNAJB9	678.38	1.46485	0.113883	12.8627	7.29461e-38	6.29401e-36
TMSB4X	1215.57	1.46228	0.130034	11.2454	2.43928e-29	1.30466e-27
PTPRB	65.4243	1.45943	0.26684	5.46931	4.5178e-08	3.70415e-07
E2F1	1198.68	1.45846	0.0828738	17.5985	2.52716e-69	5.13631e-67
GPX2	413.419	1.45369	0.126737	11.4701	1.86425e-30	1.08602e-28
TUBB2B	173.172	1.4534	0.178947	8.12199	4.58606e-16	9.40451e-15
CDA	67.1595	1.44667	0.268515	5.38768	7.13743e-08	5.69624e-07
BMP2	1034.69	1.4455	0.0937279	15.4223	1.15927e-53	1.71011e-51
SLCO4A1	563.529	1.44546	0.112348	12.8659	7.00459e-38	6.07241e-36
CHAF1A	699.895	1.44369	0.100289	14.3953	5.53872e-47	6.98719e-45
TMBIM1	7422.18	1.43722	0.0659326	21.7983	2.41015e-105	9.38009e-103
ADGRF2	115.778	1.43512	0.211757	6.77724	1.22494e-11	1.59025e-10
RFX2	122.277	1.43412	0.207087	6.92521	4.35334e-12	5.97384e-11
NOSTRIN	222.428	1.43273	0.157312	9.10757	8.42472e-20	2.32787e-18
C1QL1	22.0668	1.4308	0.491105	2.91342	0.00357493	0.0114925
TSPYL2	720.335	1.43005	0.1185	12.0679	1.56052e-33	1.07717e-31
IMPAD1	1689.01	1.42854	0.0809849	17.6396	1.22239e-69	2.51235e-67
CD300LF	97.5693	1.42755	0.222891	6.4047	1.50669e-10	1.71716e-09
RRM2	3241.62	1.42392	0.0683471	20.8336	2.14675e-96	6.88917e-94
DZIP1L	18.8533	1.42204	0.528386	2.6913	0.00711746	0.0208977
ESYT2	4501.82	1.42162	0.0663541	21.4247	7.86082e-102	2.81942e-99
GUCA2A	325.424	1.42007	0.130329	10.896	1.2039e-27	5.70511e-26
ATAD2	1928.14	1.41706	0.074463	19.0304	9.55869e-81	2.46264e-78
ABCA7	397.408	1.41575	0.133703	10.5887	3.36057e-26	1.42957e-24
EMP3	23.4279	1.41487	0.470985	3.00406	0.00266401	0.00886968
PPP1R13L	671.331	1.41364	0.102945	13.732	6.52696e-43	7.32462e-41
RELT	82.8203	1.41272	0.251073	5.62673	1.83654e-08	1.59895e-07
FHL2	155.316	1.41131	0.177886	7.93378	2.12567e-15	4.04186e-14
CCND1	2560.97	1.40997	0.0766994	18.3831	1.79366e-75	4.05057e-73
EXO1	379.349	1.40986	0.128218	10.9958	4.00341e-28	1.95281e-26
RAD51	303.518	1.4054	0.147517	9.52702	1.6186e-21	5.04384e-20
IKBIP	260.547	1.40359	0.14335	9.79137	1.22628e-22	4.11581e-21
ARG2	89.0777	1.40306	0.236199	5.94016	2.84744e-09	2.7573e-08
ETS1	48.5218	1.40019	0.317246	4.41357	1.01682e-05	5.71771e-05
DSC2	756.155	1.39569	0.096486	14.4652	2.00885e-47	2.58774e-45
F2RL1	4799.1	1.39519	0.0825607	16.899	4.57822e-64	8.45908e-62
LIN54	807.778	1.39397	0.0941601	14.8043	1.3744e-49	1.87616e-47
PKMYT1	174.599	1.39019	0.199835	6.9567	3.48327e-12	4.84533e-11
MCM10	583.08	1.39008	0.106273	13.0802	4.27132e-39	3.96604e-37
PKM	11480.4	1.38797	0.0581644	23.8629	7.43761e-126	4.38867e-123
TGFB1	227.467	1.38428	0.15847	8.73532	2.42966e-18	5.97357e-17
PGAM1	621.273	1.38408	0.108824	12.7185	4.6697e-37	3.84767e-35
MAPK8IP2	15.4603	1.37986	0.560442	2.46209	0.013813	0.0368749
SNX25	563.651	1.37521	0.135757	10.13	4.06843e-24	1.5376e-22
ID1	91.2099	1.37332	0.244453	5.61793	1.93258e-08	1.67064e-07
CDC6	927.232	1.37265	0.0890124	15.4209	1.1841e-53	1.73277e-51
SPOCK2	24.4451	1.36836	0.46517	2.94163	0.00326489	0.0106147
DKK4	24.9896	1.36628	0.445428	3.06734	0.00215972	0.00738424
DSP	17631.4	1.36065	0.0726923	18.718	3.53329e-78	8.50408e-76
CP	126.011	1.35865	0.197803	6.86866	6.48061e-12	8.71002e-11
RELB	91.9444	1.35256	0.240522	5.62341	1.8722e-08	1.62536e-07
ESAM	85.783	1.3522	0.242177	5.58353	2.35689e-08	2.01365e-07
LSR	5103.6	1.34986	0.0910197	14.8304	9.31214e-50	1.28073e-47
JAML	770.29	1.34849	0.105236	12.8139	1.37011e-37	1.17112e-35
DTL	476.709	1.34575	0.110482	12.1808	3.93443e-34	2.80033e-32
RIMKLA	738.05	1.34029	0.0998929	13.4173	4.78974e-41	4.81395e-39
ITGA2	820.39	1.3399	0.0988553	13.5542	7.48325e-42	7.86243e-40
PLIN2	1930.28	1.33821	0.0818475	16.35	4.34968e-60	7.29948e-58
NEDD9	413.574	1.3376	0.122713	10.9003	1.14888e-27	5.47275e-26
TMSB10	6200	1.33408	0.101937	13.0873	3.89346e-39	3.63364e-37
FNDC3B	1394.57	1.33325	0.0787044	16.94	2.28181e-64	4.25906e-62
IQCD	18.752	1.3329	0.505119	2.63878	0.00832059	0.0239158
APOA4	347.492	1.33153	0.163562	8.14083	3.92579e-16	8.07767e-15
CDC45	334.285	1.33129	0.134689	9.88415	4.87695e-23	1.68957e-21
SYDE1	16.4298	1.32476	0.519793	2.54862	0.0108149	0.0299737
SCEL	231.176	1.32371	0.150029	8.82304	1.11394e-18	2.81784e-17
LRRC66	43.6507	1.32173	0.323842	4.08142	4.47622e-05	0.0002228
CDCA4	248.245	1.32153	0.162761	8.11946	4.68262e-16	9.57033e-15
TOR1AIP1	793.069	1.32052	0.0981156	13.4588	2.73299e-41	2.79284e-39
CCNE2	129.878	1.31899	0.201521	6.5452	5.94176e-11	7.08981e-10
FAM234B	189.938	1.31578	0.169823	7.74794	9.33925e-15	1.67648e-13
TPI1	13458.8	1.31419	0.0612142	21.4688	3.05082e-102	1.11611e-99
ZNF575	58.2974	1.30824	0.286476	4.56667	4.95529e-06	2.94389e-05
CLSPN	355.205	1.3068	0.123091	10.6165	2.49784e-26	1.07507e-24
MXD1	620.088	1.30194	0.100091	13.0076	1.10757e-38	9.88277e-37
FSCN1	137.678	1.30135	0.197566	6.58693	4.49011e-11	5.43567e-10
CDR2	1030.79	1.30124	0.104779	12.4189	2.06386e-35	1.62026e-33
AGPAT2	1539.33	1.29991	0.100804	12.8954	4.77618e-38	4.18019e-36
KDM4B	821.099	1.29988	0.101414	12.8176	1.30704e-37	1.12246e-35
C11orf86	55.2007	1.2995	0.291916	4.45162	8.52244e-06	4.85495e-05
TMCC1	1211.44	1.29692	0.0999928	12.9702	1.80659e-38	1.59643e-36
KLF11	920.621	1.29561	0.102218	12.675	8.13478e-37	6.6134e-35
PHF1	865.352	1.29531	0.0963179	13.4483	3.14981e-41	3.2009e-39
CD55	1969.66	1.29468	0.0937025	13.8169	2.01505e-43	2.30371e-41
UHRF1	351.987	1.29313	0.135288	9.55834	1.19656e-21	3.75429e-20
GDPD2	169.189	1.28739	0.189824	6.78203	1.18502e-11	1.54171e-10
CEP128	112.699	1.28503	0.21316	6.02849	1.65498e-09	1.65641e-08
SH3D21	456.424	1.28499	0.118756	10.8204	2.75524e-27	1.26949e-25
ORC1	306.297	1.28348	0.131918	9.72941	2.25891e-22	7.48552e-21
INSIG1	4867.06	1.28202	0.090454	14.1731	1.34356e-45	1.61687e-43
GPAT3	349.456	1.28196	0.133065	9.63413	5.73777e-22	1.85434e-20
PDLIM2	696.084	1.28148	0.0983345	13.0319	8.06242e-39	7.33721e-37
SLCO2A1	95.8466	1.27795	0.219782	5.81464	6.07647e-09	5.62789e-08
JUND	858.537	1.27441	0.118295	10.7731	4.61352e-27	2.09927e-25
SLC30A4	19.938	1.27074	0.478923	2.65333	0.00797026	0.0230813
FOXJ2	788.501	1.26874	0.0939879	13.499	1.58607e-41	1.63911e-39
JMJD6	577.407	1.26843	0.127935	9.91463	3.59579e-23	1.26246e-21
IL6R	822.294	1.2682	0.0983852	12.8902	5.11397e-38	4.45451e-36
CYP2S1	1423.91	1.26788	0.0918948	13.7971	2.65493e-43	3.01639e-41
HAP1	28.9798	1.26471	0.391686	3.22888	0.00124276	0.00451851
RAB30	260.739	1.2639	0.142951	8.84147	9.44706e-19	2.41012e-17
GAN	247.376	1.26338	0.158262	7.98284	1.4301e-15	2.75362e-14
CDCA5	948.463	1.26155	0.0954843	13.2121	7.46783e-40	7.15191e-38
IGFBP2	31.4755	1.25913	0.420594	2.99369	0.00275622	0.00913017
EIF1	6054.53	1.25509	0.0890042	14.1015	3.71879e-45	4.41715e-43
SYK	23.3841	1.2545	0.444715	2.82091	0.00478879	0.0148368
PIM1	1242.46	1.25365	0.0847545	14.7916	1.66023e-49	2.24955e-47
SOCS3	196.495	1.25169	0.167562	7.46999	8.02004e-14	1.31572e-12
PCLAF	169.113	1.25056	0.17182	7.2783	3.38056e-13	5.24489e-12
UNC5B	2887.2	1.24975	0.0745881	16.7554	5.17335e-63	9.09913e-61
GALNT3	2225.44	1.24802	0.0816504	15.285	9.63309e-53	1.39848e-50
ZNF488	1644.89	1.24741	0.0786331	15.8637	1.13118e-56	1.79927e-54
RNF24	648.797	1.24613	0.10914	11.4177	3.41187e-30	1.95643e-28
NMB	54.0349	1.24505	0.300663	4.14101	3.45773e-05	0.000176476
OSGIN1	372.366	1.23813	0.14197	8.72104	2.75649e-18	6.71663e-17
CDR2L	614.048	1.23736	0.101123	12.2361	1.99273e-34	1.44647e-32
DPCD	135.282	1.2364	0.215529	5.73661	9.65887e-09	8.75087e-08
VEGFA	4900.31	1.23239	0.0644332	19.1266	1.51559e-81	4.01786e-79
TNIP1	2412.93	1.23131	0.0745702	16.5121	3.00269e-61	5.1332e-59
CAVIN3	22.6695	1.23106	0.438025	2.81048	0.0049468	0.0152592
RUNX3	38.4371	1.22564	0.337766	3.62867	0.00028488	0.00121102
CCL28	457.331	1.22379	0.124878	9.79993	1.12664e-22	3.79531e-21
IPMK	1274.33	1.22308	0.0990516	12.3479	4.99799e-35	3.77782e-33
MSMB	110.133	1.22292	0.236213	5.17717	2.25272e-07	1.66115e-06
PIM2	172.618	1.22022	0.174724	6.9837	2.87506e-12	4.04855e-11
PBX4	21.9308	1.21999	0.454348	2.68515	0.00724973	0.0212417
SH2B2	38.8241	1.21757	0.347712	3.50168	0.000462339	0.00186815
ISM2	87.2308	1.21724	0.239079	5.09136	3.55502e-07	2.54614e-06
FOXO1	706.873	1.21711	0.101058	12.0436	2.09542e-33	1.43556e-31
SIDT1	83.3612	1.21689	0.235512	5.16702	2.37854e-07	1.74872e-06
COPZ2	23.995	1.21565	0.43666	2.78397	0.00536982	0.0163708
CSRP2	151.14	1.21552	0.182484	6.66101	2.71959e-11	3.3681e-10
PIR	186.709	1.21165	0.19227	6.30184	2.94129e-10	3.22748e-09
CDC25A	483.439	1.21133	0.109779	11.0343	2.61111e-28	1.29437e-26
TP73	189.193	1.20922	0.161581	7.4837	7.22603e-14	1.19187e-12
CRABP2	58.9711	1.20684	0.278302	4.33643	1.44813e-05	7.94753e-05
PNKD	1565.22	1.20552	0.07675	15.707	1.35348e-55	2.02933e-53
NFKB2	409.462	1.2046	0.119948	10.0426	9.9021e-24	3.62258e-22
FAM111B	902.708	1.20371	0.131111	9.18083	4.27786e-20	1.19649e-18
YEATS2	1754.64	1.20217	0.0790772	15.2025	3.40423e-52	4.86486e-50
RIMS4	511.079	1.20167	0.114247	10.5182	7.12394e-26	2.98195e-24
CRKL	2733	1.20066	0.0787666	15.2433	1.82436e-52	2.62766e-50
IQGAP3	1463.27	1.20007	0.0832631	14.413	4.2866e-47	5.44517e-45
NFE2L1	14504.4	1.19877	0.0547651	21.8893	3.28442e-106	1.30606e-103
CEMIP	46.4317	1.19779	0.356965	3.35547	0.000792302	0.00302311
NPC1	1283.47	1.19393	0.0817125	14.6114	2.37679e-48	3.15045e-46
KIAA0895	72.8203	1.19345	0.276463	4.31686	1.58267e-05	8.62383e-05
SPRY4	401.652	1.18962	0.123902	9.60132	7.89301e-22	2.51531e-20
NFKBID	50.733	1.18453	0.308518	3.83942	0.000123327	0.000565721
TDP2	3758.12	1.18385	0.072002	16.442	9.57568e-61	1.62184e-58
GPR153	50.2499	1.18087	0.30682	3.84873	0.00011873	0.000547193
IL2RG	360.086	1.17902	0.132417	8.90389	5.39224e-19	1.40106e-17
TMEM92	1271.6	1.17851	0.0868499	13.5695	6.07337e-42	6.42233e-40
FBL	3029.7	1.17784	0.0876546	13.4373	3.65566e-41	3.69444e-39
EFNB2	329.947	1.17718	0.125808	9.35694	8.20795e-21	2.43338e-19
IGSF3	1528.53	1.17481	0.0754585	15.569	1.18241e-54	1.75843e-52
PSMC3IP	98.6681	1.17466	0.217626	5.3976	6.75392e-08	5.41142e-07
GRIN2D	67.9525	1.17458	0.273213	4.29914	1.71461e-05	9.28745e-05
TCF19	501.576	1.1726	0.115908	10.1166	4.66306e-24	1.75147e-22
CBARP	36.8433	1.17215	0.361541	3.24211	0.00118648	0.0043337
WNT11	179.842	1.17024	0.181824	6.43611	1.22575e-10	1.41371e-09
CAV1	82.6076	1.16979	0.242384	4.82621	1.39157e-06	9.11048e-06
FRMD3	19.6893	1.16944	0.493627	2.36908	0.0178323	0.0457807
EBI3	41.6527	1.16839	0.355272	3.28872	0.00100645	0.00374185
DUSP6	249.715	1.16713	0.144845	8.05782	7.76679e-16	1.5595e-14
RND3	869.506	1.16496	0.101725	11.452	2.29718e-30	1.32975e-28
KCMF1	1382.08	1.16387	0.102969	11.3031	1.26619e-29	6.95528e-28
HBEGF	80.4996	1.1631	0.27045	4.30062	1.70321e-05	9.23661e-05
USP37	600.982	1.16175	0.100159	11.599	4.16718e-31	2.51571e-29
PPP1R15B	2026.07	1.1604	0.0856732	13.5445	8.5403e-42	8.87609e-40
CHEK1	1346.78	1.15765	0.0810683	14.2799	2.91955e-46	3.58419e-44
MYBL1	59.3392	1.15523	0.278039	4.1549	3.25425e-05	0.000167492
OXSR1	2179.96	1.15315	0.0823369	14.0052	1.44863e-44	1.68779e-42
GNE	349.69	1.15001	0.128576	8.94415	3.74838e-19	9.85136e-18
NOS1AP	83.0359	1.14948	0.25251	4.5522	5.3088e-06	3.1376e-05
C8orf58	79.8701	1.14886	0.238051	4.82609	1.39237e-06	9.1124e-06
SEC24D	1119.77	1.14859	0.0865356	13.2731	3.3164e-40	3.22679e-38
BARD1	290.376	1.14819	0.141392	8.12059	4.63912e-16	9.50267e-15
HAVCR1	6201.04	1.14812	0.0638111	17.9924	2.23372e-72	4.86418e-70
KATNAL1	107.791	1.14728	0.208138	5.51212	3.54533e-08	2.95719e-07
ARFGEF3	320.826	1.14669	0.14718	7.79108	6.6437e-15	1.21163e-13
PIK3CD	19.6994	1.14669	0.466885	2.45604	0.0140478	0.0374144
CDH24	173.967	1.14136	0.168419	6.77691	1.22774e-11	1.59275e-10
TFRC	14669.1	1.13932	0.0616382	18.484	2.77655e-76	6.51136e-74
SMAD7	284.525	1.13902	0.145577	7.82421	5.10852e-15	9.41037e-14
SLC35E4	36.9079	1.13774	0.366166	3.10716	0.00188896	0.00656524
LZTS3	277.298	1.13735	0.143644	7.91784	2.41679e-15	4.55282e-14
MAFG	941.363	1.13607	0.0929916	12.2169	2.52444e-34	1.818e-32
LOXL2	23.7039	1.13539	0.467066	2.43089	0.0150619	0.0397391
C6orf132	843.58	1.13192	0.0996237	11.362	6.46619e-30	3.60608e-28
PLEC	4794.12	1.13093	0.0833437	13.5695	6.07404e-42	6.42233e-40
A4GALT	67.8795	1.1307	0.275782	4.09996	4.13216e-05	0.0002068
TIMD4	47.8337	1.13018	0.313998	3.59931	0.000319065	0.00134024
QRICH2	28.8345	1.13005	0.392508	2.87905	0.00398877	0.0126496
WDR54	133.502	1.12891	0.187258	6.02864	1.65347e-09	1.65636e-08
KIAA0040	559.644	1.12889	0.107506	10.5008	8.5673e-26	3.56166e-24
HKDC1	635.448	1.12855	0.103436	10.9106	1.02622e-27	4.90121e-26
FEN1	1306.11	1.12736	0.0831767	13.5538	7.52201e-42	7.86243e-40
CAPN8	1009.46	1.12682	0.0949407	11.8687	1.72186e-32	1.11294e-30
GLIPR1	43.5646	1.12638	0.365813	3.07912	0.00207611	0.00714374
PLEKHA2	384.955	1.12623	0.126943	8.87194	7.18854e-19	1.84681e-17
FBXO34	1308.08	1.12475	0.10197	11.0302	2.73376e-28	1.34787e-26
SGCB	46.4751	1.12145	0.328115	3.41787	0.000631143	0.00246527
AMOTL2	3178.4	1.1214	0.0677823	16.5441	1.76665e-61	3.04864e-59
MRPS6	853.938	1.12137	0.11203	10.0096	1.38348e-23	5.02117e-22
SLC29A3	281.304	1.1202	0.143421	7.81057	5.69285e-15	1.04342e-13
APOL2	501.19	1.11997	0.132088	8.47899	2.27158e-17	5.12984e-16
TICRR	466.139	1.11906	0.117821	9.498	2.13963e-21	6.63358e-20
WDR76	314.769	1.11883	0.135165	8.27748	1.25809e-16	2.68843e-15
IL1R2	276.677	1.11871	0.147699	7.57424	3.61249e-14	6.1699e-13
LMCD1	95.077	1.11645	0.22945	4.86577	1.14013e-06	7.54886e-06
PITPNM2	385.155	1.11603	0.119712	9.32268	1.13436e-20	3.29886e-19
RAB6B	116.42	1.11298	0.20014	5.56101	2.68225e-08	2.27147e-07
FLNB	22934.9	1.11184	0.0603359	18.4275	7.90715e-76	1.80797e-73
FAM160A1	835.955	1.10847	0.112467	9.8559	6.46373e-23	2.21828e-21
MND1	126.044	1.1076	0.230818	4.79857	1.59802e-06	1.0329e-05
NR4A2	30.4671	1.10757	0.380974	2.90721	0.00364668	0.0116985
CEMIP2	712.782	1.10618	0.0976888	11.3235	1.00396e-29	5.54816e-28
TRMT61A	403.061	1.10105	0.133543	8.24489	1.65312e-16	3.50798e-15
AMH	36.7372	1.10027	0.354436	3.1043	0.00190732	0.00661886
SCARF1	27.6096	1.09939	0.395298	2.78116	0.00541652	0.0164939
RASSF7	998.396	1.09918	0.111165	9.8878	4.70271e-23	1.6323e-21
HCN2	74.1612	1.09831	0.264304	4.15549	3.24589e-05	0.000167109
DSG2	2051.88	1.09695	0.0799993	13.712	8.60706e-43	9.60002e-41
MPP3	55.9067	1.09493	0.296737	3.68991	0.000224329	0.000973529
SMPD3	922.706	1.09436	0.106198	10.3049	6.69292e-25	2.64421e-23
PNPLA2	993.826	1.09408	0.0885997	12.3486	4.95677e-35	3.76221e-33
HASPIN	58.2047	1.09396	0.27505	3.97732	6.96968e-05	0.000335057
MCAM	37.8809	1.09131	0.351923	3.101	0.00192869	0.00668808
SDCBP	1021.23	1.08933	0.0996483	10.9317	8.1269e-28	3.89155e-26
SGMS2	216.992	1.08816	0.15987	6.80654	9.99739e-12	1.31374e-10
FAM161B	84.6892	1.08813	0.240346	4.52734	5.97302e-06	3.50524e-05
TNNT2	37.9878	1.08785	0.337654	3.2218	0.00127388	0.00461421
TOB1	3868.54	1.08667	0.0902872	12.0358	2.30526e-33	1.57343e-31
SAMD4A	599.929	1.08618	0.107067	10.1449	3.49234e-24	1.32811e-22
VAV3	186.973	1.08452	0.166522	6.51279	7.37678e-11	8.68873e-10
KLF16	108.389	1.08218	0.203971	5.30557	1.12321e-07	8.6764e-07
HIGD1A	1426.33	1.07928	0.108061	9.98769	1.72551e-23	6.22545e-22
TIAF1	139.126	1.07923	0.201685	5.35107	8.74375e-08	6.88805e-07
INO80D	790.234	1.07829	0.106715	10.1044	5.27945e-24	1.96684e-22
SIK1B	35.4978	1.07782	0.372079	2.89675	0.00377049	0.0120408
CCNE1	215.306	1.07728	0.153129	7.03514	1.99059e-12	2.84468e-11
KRT15	169.224	1.07718	0.187511	5.7446	9.21392e-09	8.36432e-08
CYP51A1	163.688	1.07711	0.185176	5.81665	6.00384e-09	5.56908e-08
ESCO2	194.078	1.07691	0.161818	6.65509	2.83118e-11	3.49918e-10
TBC1D3L	37.5926	1.07657	0.369426	2.91416	0.00356642	0.0114692
STBD1	45.4864	1.07646	0.308788	3.48608	0.000490151	0.00196404
RUBCNL	84.3421	1.0758	0.239613	4.48976	7.13042e-06	4.1158e-05
RASGRP1	45.7191	1.07569	0.321573	3.34509	0.000822559	0.00312877
GATA2	61.1554	1.07525	0.269576	3.98867	6.64453e-05	0.000320268
SMAP1	280.357	1.07493	0.162791	6.60313	4.02572e-11	4.88319e-10
E2F8	515.416	1.07461	0.106919	10.0507	9.12472e-24	3.35159e-22
TNS1	1145.21	1.07322	0.0841647	12.7514	3.06171e-37	2.56903e-35
FADS6	480.78	1.06945	0.112914	9.47139	2.76146e-21	8.47527e-20
CHAC1	73.03	1.06807	0.272823	3.91486	9.04558e-05	0.00042557
DCLRE1B	183.316	1.06628	0.16813	6.34201	2.26784e-10	2.52754e-09
GNG5	28.7482	1.06625	0.403887	2.63997	0.00829126	0.0238465
KLF6	1481.67	1.06458	0.0818624	13.0046	1.15258e-38	1.02345e-36
PTPRA	3011.23	1.06427	0.0816368	13.0366	7.57457e-39	6.9277e-37
TMEM39A	1145	1.0631	0.0845088	12.5798	2.7288e-36	2.19891e-34
POLD3	1002.36	1.06154	0.09569	11.0935	1.34859e-28	6.83333e-27
PLXNA2	404.317	1.05915	0.142298	7.44316	9.83037e-14	1.59554e-12
SLC5A1	36.6057	1.05865	0.367888	2.87763	0.00400673	0.0126947
TUBB2A	165.881	1.05815	0.171189	6.18116	6.36315e-10	6.72657e-09
ABTB2	169.346	1.05265	0.168554	6.24521	4.23221e-10	4.5646e-09
RASSF3	412.211	1.05156	0.119055	8.83256	1.02304e-18	2.59549e-17
CDCA7L	121.912	1.05105	0.203029	5.17687	2.25642e-07	1.66295e-06
CHPF	1389.09	1.05015	0.109129	9.62298	6.3948e-22	2.0594e-20
MAP2K1	707.795	1.04943	0.109252	9.60562	7.56996e-22	2.41657e-20
GCOM1	73.9273	1.04935	0.255285	4.1105	3.94803e-05	0.000198836
MVD	2111.48	1.04911	0.0908667	11.5456	7.771e-31	4.61517e-29
PIM3	460.181	1.04725	0.109745	9.54253	1.39384e-21	4.3583e-20
DYSF	46.7092	1.04673	0.334592	3.12837	0.00175781	0.00616388
BCL3	262.911	1.04634	0.15265	6.8545	7.15616e-12	9.54086e-11
POLR3D	880.375	1.04582	0.0934834	11.1872	4.70976e-29	2.44054e-27
GEM	138.283	1.04517	0.193386	5.40456	6.49678e-08	5.226e-07
CCDC28A	217.093	1.04373	0.177267	5.88793	3.91052e-09	3.71397e-08
SEC24A	3279.51	1.04369	0.0847893	12.3092	8.07954e-35	6.05701e-33
ZNF703	441.448	1.04337	0.119132	8.75807	1.98627e-18	4.91649e-17
PRKAA2	357.078	1.04243	0.131441	7.93078	2.17778e-15	4.13235e-14
VDAC2	1224.95	1.04128	0.0870173	11.9664	5.33183e-33	3.57252e-31
ELF3	2182.14	1.04062	0.0726255	14.3285	1.45133e-46	1.80596e-44
ARID3B	571.617	1.04004	0.112716	9.22704	2.78224e-20	7.86595e-19
NOCT	168.154	1.03962	0.178436	5.8263	5.6669e-09	5.26722e-08
TP53INP2	587.603	1.03637	0.104295	9.93692	2.87577e-23	1.01748e-21
PPP1R12B	875.902	1.0354	0.0996729	10.3879	2.81398e-25	1.1464e-23
CITED2	907.341	1.03473	0.0869429	11.9013	1.16517e-32	7.61188e-31
CLDN4	5252.86	1.03379	0.0654765	15.7887	3.72398e-56	5.7728e-54
GINS2	732.228	1.0323	0.0960737	10.7449	6.26332e-27	2.81495e-25
C2CD2L	374.514	1.03176	0.128638	8.02065	1.05188e-15	2.06006e-14
GM2A	2509.41	1.03172	0.0798156	12.9263	3.1999e-38	2.81406e-36
ZNF292	1375.49	1.03133	0.101652	10.1457	3.46288e-24	1.31964e-22
MASTL	883.246	1.03032	0.0912267	11.2941	1.4037e-29	7.66463e-28
ZFP36	709.375	1.02995	0.0962061	10.7057	9.572e-27	4.22925e-25
GPX8	37.9594	1.02986	0.35085	2.93533	0.00333191	0.0108082
POFUT2	849.039	1.02963	0.0933303	11.0321	2.67409e-28	1.32201e-26
SLC1A4	602.442	1.02706	0.113169	9.07548	1.13181e-19	3.09002e-18
MELTF	728.889	1.02665	0.114465	8.96907	2.99033e-19	7.9274e-18
PFKL	2574.61	1.0266	0.0913908	11.233	2.80678e-29	1.49249e-27
RBM15	442.9	1.02611	0.111765	9.18096	4.27255e-20	1.19649e-18
WIPF3	260.784	1.02596	0.15278	6.71528	1.87709e-11	2.37125e-10
DOP1B	703.006	1.02581	0.0992109	10.3397	4.66171e-25	1.87e-23
AGAP1	1702.84	1.02422	0.0784058	13.0631	5.34943e-39	4.942e-37
IL18BP	804.904	1.02378	0.0931594	10.9895	4.29115e-28	2.08206e-26
PRRG1	218.122	1.02182	0.150058	6.80948	9.79535e-12	1.28904e-10
HRH1	88.4848	1.01977	0.230508	4.424	9.68886e-06	5.47002e-05
SFN	416.347	1.01915	0.117851	8.64781	5.24953e-18	1.25032e-16
YOD1	435.195	1.01909	0.145255	7.01588	2.28508e-12	3.25281e-11
DDIT3	479.929	1.019	0.127467	7.99424	1.30373e-15	2.5343e-14
ME1	2123.76	1.01858	0.0782303	13.0203	9.38042e-39	8.41111e-37
PCNA	2501.94	1.01715	0.077122	13.1888	1.01826e-39	9.70108e-38
TMCC3	68.2686	1.01693	0.257525	3.94885	7.85275e-05	0.000374654
FHDC1	44.3601	1.01633	0.311982	3.25766	0.00112336	0.00412868
SAP30	53.912	1.01541	0.301639	3.36631	0.000761823	0.00291655
MYOF	3553.52	1.01395	0.0704409	14.3944	5.61153e-47	7.03055e-45
SLC19A3	2469.07	1.01316	0.0740746	13.6775	1.38317e-42	1.53339e-40
GPR137B	97.7999	1.01265	0.216543	4.67642	2.91933e-06	1.7986e-05
EIF2AK3	772.451	1.01004	0.0972602	10.385	2.90239e-25	1.17979e-23
FERMT2	455.376	1.00994	0.114291	8.83654	9.87286e-19	2.50825e-17
KIF22	1424.5	1.00984	0.0825856	12.2278	2.20893e-34	1.59707e-32
PRADC1	306.485	1.00978	0.139235	7.25234	4.0963e-13	6.3019e-12
RFFL	467.194	1.00921	0.116548	8.65918	4.75187e-18	1.13771e-16
APAF1	743.506	1.00902	0.121368	8.31373	9.27419e-17	2.00761e-15
CCDC153	23.5516	1.00845	0.426787	2.36288	0.0181335	0.0464304
PRELID2	404.588	1.00799	0.135413	7.44385	9.77904e-14	1.58862e-12
ERICH4	254.973	1.00717	0.142536	7.06605	1.5941e-12	2.30144e-11
IRF7	203.75	1.00613	0.182661	5.50818	3.62564e-08	3.01867e-07
MEX3D	278.079	1.00588	0.158819	6.3335	2.39656e-10	2.66007e-09
BIRC3	99.2815	1.00466	0.24452	4.10872	3.97853e-05	0.000200027
SEMA4B	373.858	1.00379	0.122893	8.16804	3.13438e-16	6.4931e-15
GNRH2	83.5148	1.00073	0.325362	3.07575	0.00209973	0.00720739
TMEM163	67.9303	-1.00016	0.26831	-3.72763	0.000193289	0.000851816
SKIDA1	79.759	-1.00046	0.24157	-4.14148	3.45072e-05	0.000176167
TCTN1	96.1232	-1.00269	0.230589	-4.34839	1.37142e-05	7.5606e-05
USP45	137.893	-1.00306	0.230346	-4.35457	1.33327e-05	7.3792e-05
PZP	74.3697	-1.00335	0.25562	-3.92516	8.66708e-05	0.000409342
SLC43A1	995.706	-1.00389	0.0851606	-11.7882	4.48814e-32	2.84073e-30
MRM1	99.8848	-1.00473	0.215181	-4.66921	3.02359e-06	1.86096e-05
APOBEC2	28.0417	-1.00721	0.396809	-2.53828	0.01114	0.0307117
ARV1	166.354	-1.00768	0.177736	-5.66952	1.43202e-08	1.26447e-07
MARCHF1	38.9384	-1.00858	0.338498	-2.97958	0.00288648	0.00951858
SHBG	29.411	-1.00969	0.403421	-2.50281	0.0123213	0.0334591
ZNF879	79.9714	-1.01052	0.258143	-3.91457	9.05657e-05	0.000425978
SPIN2B	26.8846	-1.01147	0.400586	-2.52497	0.0115708	0.0317417
HHIPL1	47.1856	-1.01156	0.333331	-3.03469	0.00240779	0.00812158
CCNB1	1367.12	-1.01189	0.085485	-11.8371	2.50969e-32	1.61078e-30
SALL4	421.395	-1.01301	0.126151	-8.03015	9.73569e-16	1.92525e-14
C19orf44	35.1682	-1.01314	0.371514	-2.72705	0.0063903	0.0190501
PMFBP1	165.659	-1.01662	0.175684	-5.78664	7.18084e-09	6.59397e-08
KDM8	51.9545	-1.01676	0.32685	-3.11078	0.00186594	0.00649388
ZNF764	163.458	-1.01764	0.174183	-5.84236	5.14661e-09	4.80315e-08
SORD	758.413	-1.01922	0.0975286	-10.4504	1.45838e-25	6.02184e-24
ASPHD1	128.125	-1.01931	0.191687	-5.31759	1.05152e-07	8.16745e-07
PAQR6	102.458	-1.02005	0.232585	-4.38569	1.15619e-05	6.43413e-05
DKK1	1252.58	-1.02457	0.10189	-10.0556	8.67812e-24	3.19397e-22
NRBP2	315.413	-1.02672	0.138967	-7.38821	1.48816e-13	2.38367e-12
PLEKHG4	1566.36	-1.02857	0.115163	-8.93146	4.20436e-19	1.10181e-17
RIDA	304.27	-1.0296	0.138524	-7.4326	1.06483e-13	1.72524e-12
MUTYH	30.2941	-1.03041	0.40739	-2.5293	0.011429	0.0314007
BORCS5	199.768	-1.03102	0.171778	-6.00207	1.94823e-09	1.92737e-08
UBLCP1	264.818	-1.03165	0.140179	-7.35953	1.84553e-13	2.93296e-12
RFX5	320.557	-1.03268	0.128242	-8.05259	8.10611e-16	1.62051e-14
ZNF311	77.7441	-1.03271	0.243224	-4.24595	2.17671e-05	0.00011588
NDUFC2	834.197	-1.03448	0.112047	-9.23252	2.64339e-20	7.49656e-19
HSPA2	32.3719	-1.035	0.367582	-2.8157	0.00486707	0.0150437
CYP4V2	134.012	-1.03503	0.194497	-5.32158	1.02871e-07	8.01072e-07
TNXB	165.77	-1.03506	0.216233	-4.78676	1.69497e-06	1.09017e-05
H2BC21	163.855	-1.0362	0.170454	-6.07902	1.2092e-09	1.23499e-08
TBCEL	204.141	-1.03785	0.172159	-6.02846	1.65532e-09	1.65641e-08
COL26A1	286.571	-1.03885	0.140213	-7.4091	1.27161e-13	2.04937e-12
ZFP69	30.872	-1.03889	0.387104	-2.68375	0.00728026	0.0213209
IMPACT	273.89	-1.03901	0.144465	-7.19208	6.38106e-13	9.66245e-12
SLC24A1	172.157	-1.03959	0.188765	-5.50734	3.64301e-08	3.03175e-07
ACTR6	308.048	-1.03988	0.149148	-6.97211	3.12228e-12	4.37311e-11
GPC5	192.033	-1.04042	0.169498	-6.13825	8.34371e-10	8.69647e-09
STEAP3	239.132	-1.04128	0.162145	-6.42191	1.34577e-10	1.54337e-09
RAB27A	327.445	-1.04328	0.1283	-8.13162	4.23578e-16	8.70571e-15
OLFML3	326.206	-1.04421	0.131559	-7.93721	2.06772e-15	3.93987e-14
TRIM17	41.9606	-1.04427	0.341066	-3.06178	0.00220028	0.00750746
F10	1050.43	-1.04597	0.0906955	-11.5328	9.01928e-31	5.33918e-29
ONECUT2	86.7915	-1.04867	0.241884	-4.33543	1.45475e-05	7.97909e-05
HPX	1098.9	-1.05223	0.0859698	-12.2395	1.91257e-34	1.39381e-32
ZNF594	148.37	-1.05276	0.179899	-5.85194	4.85874e-09	4.54609e-08
ZNF239	125.04	-1.05319	0.207411	-5.07778	3.81869e-07	2.72325e-06
KYNU	111.333	-1.05332	0.213647	-4.93018	8.21547e-07	5.55965e-06
PLBD1	160.994	-1.05487	0.184245	-5.72533	1.03235e-08	9.32989e-08
DOC2A	126.573	-1.0555	0.191943	-5.49904	3.81873e-08	3.1636e-07
MAML3	238.139	-1.05635	0.150695	-7.00985	2.38581e-12	3.38567e-11
MAFB	32.6538	-1.05668	0.371762	-2.84236	0.00447814	0.0139761
KBTBD3	72.5922	-1.05817	0.258204	-4.09819	4.16402e-05	0.000208281
FREM2	1163.37	-1.0582	0.0940318	-11.2537	2.22132e-29	1.19507e-27
AGMAT	729.949	-1.05838	0.0982289	-10.7746	4.53517e-27	2.06876e-25
BANK1	58.5514	-1.05857	0.284817	-3.71667	0.000201869	0.000885299
ZNF485	89.8646	-1.06023	0.236915	-4.47516	7.63555e-06	4.39074e-05
AK3	423.638	-1.06052	0.120281	-8.81699	1.17575e-18	2.96645e-17
RNLS	113.205	-1.06097	0.202006	-5.25216	1.50322e-07	1.14e-06
CCDC18	53.5794	-1.06119	0.29306	-3.62108	0.000293379	0.00124224
EEF1AKMT1	54.6467	-1.06124	0.295178	-3.59526	0.000324064	0.00135865
HMGA2	562.416	-1.0613	0.116177	-9.13523	6.52657e-20	1.81711e-18
CATSPERB	31.3701	-1.06171	0.377539	-2.81218	0.00492075	0.0151891
HOXC11	92.1266	-1.06197	0.226803	-4.68237	2.83581e-06	1.75068e-05
MYCL	77.8547	-1.06216	0.26767	-3.96818	7.24224e-05	0.000347248
BEND3	130.204	-1.0626	0.201588	-5.27115	1.35572e-07	1.03544e-06
COX18	181.734	-1.06374	0.164492	-6.46681	1.00093e-10	1.16544e-09
DLL1	57.7475	-1.065	0.276075	-3.85764	0.000114486	0.000529099
BDH2	465.994	-1.06514	0.126205	-8.43982	3.17833e-17	7.07275e-16
ZNF554	64.4578	-1.066	0.276329	-3.85772	0.000114451	0.000529071
C8B	21.8819	-1.06652	0.450871	-2.36548	0.0180069	0.0461578
RBP4	8609.21	-1.06847	0.0674227	-15.8473	1.46661e-56	2.31269e-54
ELAC1	38.6268	-1.06916	0.339122	-3.15272	0.00161755	0.00572972
PEG10	27935.7	-1.06983	0.0572347	-18.6919	5.75939e-78	1.36819e-75
MEX3A	204.013	-1.07065	0.15361	-6.96991	3.17142e-12	4.43853e-11
CLUAP1	109.117	-1.07234	0.20763	-5.16465	2.40887e-07	1.76889e-06
BIVM	220.692	-1.07259	0.149353	-7.18157	6.89144e-13	1.03837e-11
CTXND1	132.456	-1.07277	0.199808	-5.36903	7.91597e-08	6.28195e-07
MAP2K6	386.858	-1.07292	0.122429	-8.76362	1.89071e-18	4.68631e-17
AQP7	126.997	-1.07302	0.1996	-5.37587	7.62124e-08	6.0612e-07
HLF	154.261	-1.07391	0.195208	-5.50135	3.76886e-08	3.12795e-07
DYNC1I1	152.727	-1.07617	0.177488	-6.06336	1.3331e-09	1.35398e-08
GRIN2C	80.9916	-1.07627	0.237501	-4.53165	5.85241e-06	3.43998e-05
AGBL2	105.734	-1.07808	0.209642	-5.14246	2.71171e-07	1.97935e-06
SERPINA11	70.9977	-1.07833	0.257509	-4.18753	2.82007e-05	0.000146965
TBC1D30	37.8952	-1.07961	0.35747	-3.02013	0.00252664	0.00847401
RCN3	55.7079	-1.08013	0.283326	-3.81233	0.000137662	0.000627018
PPP1R36	44.3401	-1.08103	0.32155	-3.36195	0.000773955	0.0029599
HAGHL	40.5677	-1.08638	0.350068	-3.10334	0.00191347	0.00663781
HAL	95.0698	-1.08962	0.226749	-4.80543	1.54422e-06	1.00131e-05
RBM45	149.43	-1.09268	0.188473	-5.79751	6.73083e-09	6.20566e-08
ALG1L	21.5533	-1.09415	0.448713	-2.43841	0.014752	0.0390512
ZP3	30.1631	-1.09436	0.396287	-2.76154	0.00575295	0.0173824
GRTP1	196.547	-1.09573	0.158246	-6.92424	4.38337e-12	6.01055e-11
HAPLN3	189.637	-1.09602	0.16507	-6.63975	3.14219e-11	3.86529e-10
CLYBL	68.1014	-1.09604	0.265384	-4.13	3.62761e-05	0.000184272
PYROXD2	40.3493	-1.09626	0.341905	-3.20634	0.00134437	0.00483984
C2orf16	166.847	-1.0974	0.182256	-6.02118	1.73151e-09	1.72604e-08
SULT1C2	1581.49	-1.09798	0.094144	-11.6628	1.97499e-31	1.22463e-29
PGGHG	925.736	-1.09899	0.10804	-10.1722	2.64e-24	1.01451e-22
MAN1C1	125.533	-1.09957	0.200824	-5.47526	4.3686e-08	3.58664e-07
PID1	75.2776	-1.09992	0.253267	-4.34292	1.40602e-05	7.73968e-05
ERVMER34-1	470.73	-1.09997	0.110474	-9.95683	2.35444e-23	8.39521e-22
SLC38A6	80.2455	-1.10149	0.272831	-4.03728	5.40744e-05	0.000265253
ADAT2	319.489	-1.10493	0.12663	-8.72567	2.64604e-18	6.47944e-17
RAB27B	57.4045	-1.10759	0.310292	-3.5695	0.000357669	0.0014849
RHOQ	219.875	-1.10759	0.156636	-7.07114	1.5367e-12	2.22384e-11
FIG4	172.507	-1.10791	0.166972	-6.6353	3.23854e-11	3.96515e-10
ATR	431.486	-1.10896	0.127492	-8.69832	3.36844e-18	8.12868e-17
TIGD1	121.153	-1.10924	0.214002	-5.18332	2.17975e-07	1.61164e-06
FAM89A	134.066	-1.11095	0.187579	-5.92255	3.16982e-09	3.05171e-08
ANXA8L1	21.426	-1.11101	0.458757	-2.42179	0.0154442	0.040584
PCDHGA1	41.082	-1.11264	0.341831	-3.25494	0.00113415	0.0041625
TGM2	1256.52	-1.11478	0.0855685	-13.0279	8.49239e-39	7.69024e-37
SPTSSB	843.756	-1.11494	0.0997373	-11.1788	5.18071e-29	2.67699e-27
DUS4L	97.4519	-1.11495	0.216179	-5.15755	2.50207e-07	1.83365e-06
FRA10AC1	239.446	-1.11522	0.14778	-7.54651	4.47082e-14	7.5443e-13
ZNF572	108.456	-1.11588	0.207274	-5.3836	7.30108e-08	5.82177e-07
DUSP19	80.6879	-1.11682	0.268299	-4.16259	3.14657e-05	0.000162407
SERPINA4	382.522	-1.1183	0.128086	-8.73081	2.52859e-18	6.20844e-17
XDH	99.9194	-1.11986	0.247395	-4.52661	5.9937e-06	3.514e-05
SPSB2	169.248	-1.12162	0.183514	-6.11194	9.84286e-10	1.01606e-08
MAT1A	477.646	-1.12738	0.109941	-10.2544	1.13104e-24	4.44926e-23
TTC6	133.738	-1.12823	0.200533	-5.62616	1.84265e-08	1.60274e-07
ARHGAP4	161.919	-1.13236	0.173341	-6.53256	6.46534e-11	7.66454e-10
GCFC2	234.714	-1.1366	0.164587	-6.90574	4.99417e-12	6.79207e-11
ALDH1B1	434.992	-1.13674	0.121621	-9.34654	9.05589e-21	2.66286e-19
TMEM42	170.193	-1.13837	0.168687	-6.74842	1.49461e-11	1.9226e-10
C1QTNF6	398.326	-1.13879	0.1221	-9.32675	1.09165e-20	3.18477e-19
SLC27A5	55.378	-1.13952	0.328	-3.47416	0.000512453	0.00204623
ACY3	25.2384	-1.13991	0.446799	-2.55128	0.0107328	0.0297597
CFAP70	21.5531	-1.14012	0.480924	-2.37069	0.0177549	0.045614
HOXA5	19.4114	-1.14159	0.473017	-2.41342	0.0158038	0.0413271
DECR2	268.368	-1.14181	0.147122	-7.76097	8.42833e-15	1.52343e-13
RRS1	112.343	-1.14214	0.222827	-5.12568	2.96462e-07	2.14938e-06
SCN3B	43.8458	-1.1424	0.328346	-3.47926	0.0005028	0.00200944
ZNF546	26.6571	-1.14343	0.432809	-2.64187	0.00824501	0.0237284
ST6GAL1	5733.4	-1.14388	0.0634326	-18.0329	1.07423e-72	2.36745e-70
LRFN1	92.0987	-1.14579	0.222799	-5.14273	2.70779e-07	1.97807e-06
TBC1D19	61.5061	-1.147	0.280045	-4.09575	4.20798e-05	0.000210365
NEURL2	51.9107	-1.14852	0.291157	-3.94467	7.99115e-05	0.00038019
CCT6B	29.188	-1.14961	0.400241	-2.87229	0.00407513	0.0128765
ZNF114	42.7785	-1.15168	0.321234	-3.58516	0.000336868	0.00140813
H2AJ	491.013	-1.15187	0.124527	-9.24991	2.24689e-20	6.43193e-19
SULT1E1	280.341	-1.15382	0.158257	-7.29081	3.08097e-13	4.80043e-12
ARFRP1	570.534	-1.15532	0.115014	-10.045	9.66564e-24	3.54316e-22
HSD3B1	354.101	-1.15768	0.125484	-9.22577	2.81524e-20	7.94697e-19
ITGB3	31.9226	-1.15954	0.373445	-3.10499	0.00190287	0.00660604
AKAP3	36.2146	-1.16025	0.358724	-3.2344	0.00121899	0.00444003
RWDD2B	220.535	-1.1647	0.152367	-7.64408	2.10442e-14	3.67869e-13
C11orf71	269.148	-1.16609	0.148844	-7.83432	4.71371e-15	8.71822e-14
ATP6AP1L	47.1627	-1.17245	0.315453	-3.71671	0.000201833	0.000885299
COQ3	60.8318	-1.17973	0.273946	-4.30644	1.65906e-05	9.01323e-05
CAPN3	26.9622	-1.17998	0.42432	-2.78088	0.00542117	0.0165026
WNT5A	45.4368	-1.18205	0.338484	-3.49219	0.000479079	0.00192558
CCR1	82.1712	-1.18283	0.238591	-4.95756	7.13844e-07	4.87407e-06
TTC34	21.724	-1.18508	0.463398	-2.55736	0.010547	0.0293157
LHX4	65.8209	-1.18651	0.287512	-4.12681	3.67836e-05	0.000186549
NT5E	244.542	-1.18706	0.154725	-7.67209	1.69221e-14	2.97348e-13
LRRC7	85.2118	-1.18946	0.233739	-5.08882	3.60292e-07	2.57843e-06
TMEM52B	73.5515	-1.18979	0.26028	-4.57119	4.84951e-06	2.88479e-05
OLR1	418.911	-1.19245	0.115587	-10.3165	5.93362e-25	2.35952e-23
HYAL4	17.1145	-1.19458	0.500871	-2.385	0.0170791	0.0441571
PLPP2	57.1278	-1.19698	0.281448	-4.25293	2.10995e-05	0.000112621
TTC30A	38.3698	-1.19853	0.345327	-3.47071	0.000519091	0.00206867
GLB1L	32.9267	-1.19897	0.385075	-3.11361	0.00184815	0.0064442
IFT27	222.949	-1.20054	0.155116	-7.73959	9.9736e-15	1.78685e-13
ARL15	1022.73	-1.20164	0.101532	-11.8351	2.57077e-32	1.64421e-30
PRMT3	252.436	-1.20285	0.152703	-7.87703	3.35265e-15	6.23873e-14
RASD1	115.777	-1.20477	0.200788	-6.00021	1.9706e-09	1.94844e-08
NLRX1	72.5284	-1.20562	0.250659	-4.80982	1.51065e-06	9.82672e-06
SUGCT	168.587	-1.20683	0.172893	-6.98023	2.94704e-12	4.1391e-11
RNFT2	25.0537	-1.2079	0.414733	-2.91247	0.00358587	0.0115217
RPS6KA6	115.993	-1.20817	0.201208	-6.00458	1.91828e-09	1.8998e-08
OSR1	156.788	-1.20831	0.182401	-6.62447	3.48487e-11	4.25819e-10
ADGRG1	2258.81	-1.21129	0.0890791	-13.5979	4.11929e-42	4.43235e-40
VARS1	587.762	-1.21186	0.10243	-11.8311	2.69519e-32	1.71778e-30
SLC2A2	66.5206	-1.21205	0.280643	-4.31881	1.56871e-05	8.55284e-05
POTEE	18.2275	-1.21419	0.51473	-2.35889	0.0183295	0.0468863
ZNF69	58.4675	-1.21501	0.288376	-4.21328	2.51692e-05	0.00013245
DIXDC1	148.832	-1.21573	0.18821	-6.45943	1.05095e-10	1.21825e-09
PROC	42.7584	-1.21588	0.358968	-3.38715	0.000706238	0.00272485
HIF3A	209.038	-1.21621	0.159106	-7.64401	2.10561e-14	3.67869e-13
ZNF747	124.302	-1.2166	0.199873	-6.08688	1.15132e-09	1.17917e-08
ZFP69B	16.7844	-1.21856	0.51868	-2.34935	0.0188064	0.0479183
NAV1	36.0225	-1.21938	0.383956	-3.17582	0.00149411	0.00532547
ETAA1	238.817	-1.2237	0.186809	-6.55058	5.73156e-11	6.87037e-10
SOX2	53.3504	-1.22451	0.288957	-4.2377	2.25824e-05	0.000119754
GRIK4	196.206	-1.22503	0.16282	-7.52382	5.31996e-14	8.89512e-13
RTN4IP1	112.499	-1.22808	0.20236	-6.06878	1.28882e-09	1.31191e-08
CLMP	562.888	-1.22811	0.110155	-11.1489	7.24798e-29	3.72416e-27
PDZK1IP1	62.6092	-1.22933	0.272518	-4.51101	6.45199e-06	3.76099e-05
CYP3A5	301.701	-1.22984	0.132635	-9.2724	1.82006e-20	5.2512e-19
LCN12	192.346	-1.22989	0.189831	-6.47884	9.24297e-11	1.08033e-09
SLC10A5	39.5769	-1.23131	0.352607	-3.49202	0.000479387	0.00192635
DNPH1	364.207	-1.23286	0.122933	-10.0287	1.14051e-23	4.15583e-22
KNG1	2425.62	-1.23331	0.0771808	-15.9795	1.77433e-57	2.89786e-55
KCNK15	25.5575	-1.23426	0.438068	-2.81752	0.00483963	0.0149715
PIGF	107.486	-1.24075	0.214606	-5.78152	7.40286e-09	6.78423e-08
PAPLN	129.515	-1.24089	0.192032	-6.46189	1.03402e-10	1.20167e-09
CCDC170	106.696	-1.24144	0.223925	-5.544	2.95645e-08	2.48755e-07
H1-2	208.681	-1.2416	0.164768	-7.53545	4.86636e-14	8.1891e-13
SLC25A35	16.9445	-1.24172	0.514169	-2.41501	0.0157348	0.0411932
ENPEP	30.8346	-1.24482	0.402049	-3.09619	0.00196026	0.00677827
PLA2R1	63.5891	-1.24587	0.267347	-4.66011	3.16042e-06	1.93734e-05
MAGIX	16.3696	-1.24599	0.519793	-2.39709	0.0165258	0.0429023
ZFP41	93.9634	-1.248	0.225257	-5.54033	3.01901e-08	2.53786e-07
GPRASP2	55.0214	-1.24809	0.286856	-4.35094	1.35555e-05	7.48887e-05
TSPAN7	18.3563	-1.24823	0.512788	-2.4342	0.0149249	0.0394403
ZNF844	19.0594	-1.24922	0.511349	-2.443	0.0145659	0.0386312
BEST1	37.7685	-1.25083	0.345537	-3.61995	0.000294659	0.00124708
ARMCX4	98.7085	-1.25677	0.220272	-5.70555	1.15969e-08	1.03782e-07
TRAF1	35.6901	-1.25682	0.37595	-3.34304	0.000828654	0.00314999
CPS1	335.138	-1.25909	0.131698	-9.56049	1.17203e-21	3.68365e-20
GSAP	542.806	-1.25959	0.135098	-9.32348	1.12588e-20	3.27938e-19
HSPA12B	30.5414	-1.25979	0.39605	-3.1809	0.00146819	0.00524431
FUOM	402.96	-1.26342	0.147376	-8.57276	1.01038e-17	2.33948e-16
RIIAD1	31.9763	-1.26345	0.385085	-3.28097	0.00103452	0.00383143
TMEM86B	107.117	-1.26692	0.225472	-5.61895	1.92122e-08	1.66239e-07
C15orf48	21.9693	-1.26734	0.466211	-2.71839	0.0065601	0.0194815
OAT	10880.3	-1.26788	0.0725113	-17.4852	1.85686e-68	3.69193e-66
IDNK	44.9663	-1.26979	0.333202	-3.81087	0.000138479	0.000630272
LRRC9	38.9073	-1.2726	0.362629	-3.50938	0.000449156	0.00182212
CKMT2	29.6419	-1.27839	0.397866	-3.21311	0.00131305	0.00473828
ATF7IP2	255.862	-1.27915	0.155258	-8.23889	1.73817e-16	3.67994e-15
GPD1	224.8	-1.27933	0.171256	-7.47028	8.00265e-14	1.31404e-12
MFSD3	108.095	-1.2795	0.214808	-5.9565	2.57694e-09	2.50731e-08
BFSP1	84.7204	-1.28106	0.248975	-5.14533	2.67054e-07	1.9532e-06
SLC29A4	590.086	-1.28209	0.116752	-10.9813	4.70141e-28	2.27508e-26
WDR35	128.981	-1.28379	0.210654	-6.0943	1.09916e-09	1.12764e-08
NINL	220.068	-1.28465	0.152715	-8.41207	4.02826e-17	8.90991e-16
NIPSNAP1	2157.84	-1.28693	0.0715942	-17.9754	3.03758e-72	6.49484e-70
RARRES1	239.405	-1.28801	0.155535	-8.28113	1.22007e-16	2.6133e-15
ZDHHC14	255.231	-1.29608	0.15667	-8.2727	1.30959e-16	2.79197e-15
NHS	103.756	-1.29653	0.225049	-5.76111	8.35615e-09	7.61968e-08
KIF12	1144.65	-1.29968	0.0975348	-13.3253	1.64975e-40	1.64006e-38
ZC3H6	139.12	-1.3025	0.200797	-6.48666	8.77596e-11	1.02772e-09
CLDN19	90.2369	-1.3053	0.228529	-5.71173	1.11833e-08	1.00326e-07
SRGAP3	70.0639	-1.30544	0.271025	-4.81668	1.45963e-06	9.52877e-06
CCDC40	19.2923	-1.30656	0.480278	-2.72043	0.00651969	0.019371
RMDN2	49.4239	-1.308	0.312062	-4.19148	2.77139e-05	0.000144593
GSTA1	1182.96	-1.30858	0.0962076	-13.6016	3.91816e-42	4.26613e-40
FOXQ1	408.4	-1.30863	0.136335	-9.59858	8.10497e-22	2.57837e-20
RHOBTB1	217.086	-1.3103	0.154204	-8.49723	1.94176e-17	4.40679e-16
PTGDR2	17.5237	-1.3104	0.502432	-2.60812	0.00910416	0.0258432
LBX2	74.8591	-1.31189	0.253002	-5.18531	2.15655e-07	1.59642e-06
ZMYND12	17.0724	-1.31355	0.517214	-2.53967	0.0110958	0.0306189
PRRT3	30.1844	-1.31425	0.394241	-3.33363	0.000857195	0.00324701
ROR1	330.742	-1.31559	0.132689	-9.91486	3.58758e-23	1.262e-21
B9D1	150.382	-1.31631	0.181925	-7.23545	4.63984e-13	7.12013e-12
ITIH3	42.3065	-1.31783	0.328689	-4.00936	6.08833e-05	0.000295719
MUC5AC	30.2867	-1.31974	0.411396	-3.20795	0.00133685	0.00481562
SULT1B1	192.311	-1.32287	0.166408	-7.94955	1.87191e-15	3.57422e-14
MBLAC2	92.6441	-1.3239	0.256457	-5.16229	2.43951e-07	1.78924e-06
SMAD1	71.9141	-1.32455	0.269578	-4.91341	8.95049e-07	6.02142e-06
TTC30B	37.6225	-1.32516	0.351415	-3.77093	0.000162642	0.000730613
ADTRP	15.303	-1.32569	0.542634	-2.44307	0.0145629	0.038629
KLHL31	59.6767	-1.32854	0.279961	-4.74543	2.08064e-06	1.31419e-05
MYOM1	27.3289	-1.32871	0.411906	-3.22577	0.00125633	0.00456239
ADAM23	968.494	-1.33408	0.0978754	-13.6304	2.64121e-42	2.89299e-40
CYSRT1	18.9121	-1.33409	0.520058	-2.56526	0.0103097	0.0287521
UGT2B11	27.7661	-1.33515	0.417541	-3.19764	0.00138557	0.00497835
ETFRF1	136.922	-1.33887	0.193275	-6.92726	4.29072e-12	5.89234e-11
SARDH	80.3848	-1.33958	0.249598	-5.36697	8.00697e-08	6.34866e-07
GLYATL1	112.746	-1.34027	0.207446	-6.4608	1.0415e-10	1.20883e-09
GRB14	270.588	-1.34376	0.139667	-9.62113	6.51108e-22	2.09316e-20
SLC45A3	451.897	-1.34394	0.122622	-10.96	5.94675e-28	2.86258e-26
CHRNA2	51.7846	-1.34549	0.304317	-4.42132	9.80996e-06	5.53326e-05
GSTA4	436.683	-1.35093	0.124517	-10.8494	2.0083e-27	9.32381e-26
FAM86C1	102.201	-1.35244	0.217346	-6.22253	4.89214e-10	5.23623e-09
CHI3L1	148.82	-1.35351	0.193937	-6.97909	2.97097e-12	4.16756e-11
MX2	16.195	-1.35358	0.543685	-2.48964	0.0127872	0.034504
ACADSB	1713.91	-1.35404	0.083864	-16.1457	1.21815e-58	2.00742e-56
PRUNE2	68.0464	-1.35471	0.281307	-4.81578	1.46627e-06	9.56871e-06
AOX1	20.0537	-1.3583	0.504567	-2.69202	0.00710216	0.0208624
TTLL6	55.6383	-1.36273	0.292518	-4.65863	3.18324e-06	1.95003e-05
CCDC113	17.2421	-1.36289	0.580939	-2.34601	0.0189757	0.0482623
WDR72	414.972	-1.36353	0.121538	-11.219	3.28988e-29	1.7443e-27
ADGRG5	126.759	-1.36523	0.206619	-6.60747	3.90946e-11	4.74846e-10
GSTA2	2334.91	-1.36582	0.0781635	-17.4739	2.26594e-68	4.45684e-66
PJVK	23.2026	-1.36706	0.457391	-2.98882	0.00280059	0.00925869
IGDCC3	281.054	-1.36854	0.148482	-9.21685	3.0597e-20	8.61046e-19
PAMR1	19.8731	-1.37069	0.517515	-2.6486	0.00808268	0.0233457
DUOX1	31.8784	-1.37498	0.40576	-3.38866	0.000702361	0.00271206
GLUD1	10560.8	-1.37719	0.0628417	-21.9152	1.86156e-106	7.56703e-104
GRIN2A	26.4029	-1.37837	0.451862	-3.05042	0.00228522	0.00775966
FDXACB1	32.7574	-1.3835	0.374445	-3.69479	0.000220067	0.000957531
EHHADH	527.908	-1.38409	0.114606	-12.0769	1.39879e-33	9.69193e-32
CLBA1	21.7272	-1.3848	0.458942	-3.01737	0.00254976	0.00853904
TRIM66	552.246	-1.38644	0.125071	-11.0853	1.47928e-28	7.45427e-27
SEC31B	140.386	-1.3873	0.204885	-6.77112	1.27791e-11	1.65433e-10
KLHDC9	13.2677	-1.38805	0.586986	-2.36471	0.018044	0.0462399
LIG4	160.5	-1.39428	0.178772	-7.79919	6.23074e-15	1.13973e-13
P2RX1	14.7387	-1.3955	0.556651	-2.50695	0.0121776	0.0331379
THSD7B	56.0632	-1.40286	0.291841	-4.80695	1.53252e-06	9.95134e-06
ACTL10	21.8534	-1.40417	0.47979	-2.92662	0.00342662	0.0110722
MALRD1	1103.88	-1.40671	0.105813	-13.2943	2.4984e-40	2.47031e-38
ORM2	430.091	-1.40722	0.125618	-11.2024	3.96774e-29	2.0796e-27
SEMA3A	467.696	-1.40739	0.114825	-12.2568	1.54502e-34	1.13958e-32
NOX1	99.5245	-1.40773	0.219787	-6.40497	1.50404e-10	1.7152e-09
PLA2G4E	48.2957	-1.40879	0.313397	-4.49522	6.94985e-06	4.023e-05
PEX11G	32.8135	-1.41179	0.391412	-3.60691	0.000309864	0.00130629
TM4SF20	467.881	-1.41509	0.116188	-12.1793	4.00831e-34	2.84186e-32
FTCD	44.3678	-1.41584	0.356563	-3.97079	7.16348e-05	0.000343832
FAM131B	84.9034	-1.41602	0.234309	-6.04338	1.50914e-09	1.52179e-08
UGT2B7	107.442	-1.41909	0.214089	-6.62851	3.39083e-11	4.14605e-10
METAP1D	184.832	-1.42069	0.166308	-8.54253	1.31313e-17	3.01e-16
GABRB1	38.4765	-1.42584	0.343935	-4.14566	3.38831e-05	0.000173223
KRT4	38.4624	-1.43308	0.3532	-4.05742	4.96178e-05	0.000245035
ELFN1	17.0004	-1.4337	0.519844	-2.75794	0.00581664	0.0175487
GABRA4	66.2819	-1.43481	0.298611	-4.80495	1.54792e-06	1.00335e-05
CLN3	17.5906	-1.43764	0.519402	-2.76787	0.00564246	0.0170994
ITIH6	12.4177	-1.43855	0.594961	-2.41789	0.0156107	0.0409684
ADGRA2	11.9864	-1.43925	0.616133	-2.33594	0.0194946	0.0493762
NUGGC	37.0066	-1.44318	0.349295	-4.1317	3.60089e-05	0.000183067
FKBP7	25.4806	-1.44429	0.460281	-3.13785	0.00170195	0.00598808
FJX1	16.9596	-1.44624	0.518562	-2.78895	0.00528797	0.0161536
GLUD2	53.365	-1.44843	0.295642	-4.89927	9.61921e-07	6.44758e-06
MCMDC2	66.1136	-1.45308	0.297203	-4.8892	1.01249e-06	6.76422e-06
ZNF300	147.04	-1.45968	0.193849	-7.52997	5.07505e-14	8.52459e-13
CYP2C19	115.099	-1.46038	0.22358	-6.53182	6.49773e-11	7.69297e-10
NKX1-2	103.699	-1.4639	0.226779	-6.45519	1.0808e-10	1.25047e-09
SMIM24	16.6861	-1.46509	0.539987	-2.7132	0.00666376	0.0197366
TLR5	39.2023	-1.4674	0.373074	-3.93326	8.37998e-05	0.000396815
APELA	224.426	-1.46861	0.15549	-9.44503	3.5531e-21	1.07605e-19
SLC47A1	21.6225	-1.46948	0.466933	-3.1471	0.00164899	0.00582303
POLR3G	27.1047	-1.47105	0.426124	-3.45217	0.000556099	0.00219891
SCG5	25.0864	-1.4779	0.440154	-3.3577	0.000785945	0.00300199
MYLK3	20.2467	-1.48308	0.527132	-2.81348	0.00490085	0.0151327
ADH6	292.757	-1.48533	0.156543	-9.48833	2.34761e-21	7.22938e-20
IGFL4	21.6001	-1.48725	0.466287	-3.18957	0.00142485	0.00510347
ART4	11.5622	-1.49724	0.629732	-2.37759	0.0174262	0.0449211
HEXIM2	37.9347	-1.4993	0.349749	-4.2868	1.81264e-05	9.78077e-05
MAOA	112.231	-1.50098	0.232359	-6.45977	1.04862e-10	1.21631e-09
CELF3	132.803	-1.50714	0.208499	-7.22851	4.88315e-13	7.48095e-12
LDHD	610.522	-1.51389	0.126373	-11.9795	4.55037e-33	3.06012e-31
SSC4D	14.5916	-1.51501	0.582048	-2.6029	0.00924378	0.0261907
PTGIS	181.006	-1.51618	0.170466	-8.89434	5.87695e-19	1.52053e-17
H2AC11	58.8362	-1.51784	0.289912	-5.23552	1.64517e-07	1.23841e-06
TENM1	11.2202	-1.51958	0.645704	-2.35336	0.0186046	0.0474902
H2BC11	19.7891	-1.52145	0.508436	-2.99241	0.00276785	0.00916205
CPB2	19.6883	-1.52462	0.501028	-3.04297	0.00234252	0.00791601
LNP1	32.8805	-1.52719	0.379032	-4.02919	5.59687e-05	0.000273744
CYP4F3	366.119	-1.52829	0.134592	-11.355	7.00468e-30	3.89452e-28
PCED1B	33.8244	-1.52955	0.372146	-4.11008	3.9552e-05	0.000199143
CD96	14.3912	-1.53236	0.572143	-2.67829	0.00739995	0.0216403
RCBTB1	290.035	-1.53752	0.136738	-11.2443	2.47141e-29	1.31799e-27
CD8A	24.7908	-1.54526	0.436258	-3.54207	0.000396994	0.00163407
EPHA6	46.0096	-1.55163	0.324665	-4.77917	1.76019e-06	1.12736e-05
ZFP2	14.1512	-1.55479	0.629511	-2.46983	0.0135177	0.0362029
HPDL	450.335	-1.55553	0.1182	-13.1602	1.48766e-39	1.40269e-37
NDP	28.3823	-1.56371	0.409457	-3.81898	0.000134003	0.000611877
H3C10	51.1807	-1.56624	0.306905	-5.10334	3.33713e-07	2.39854e-06
WNK2	128.863	-1.56969	0.216245	-7.25884	3.90414e-13	6.01133e-12
EXOC3L4	47.3343	-1.57399	0.352478	-4.46549	7.98872e-06	4.58518e-05
ACCS	332.784	-1.57692	0.141741	-11.1254	9.43911e-29	4.82291e-27
HP	70.0125	-1.58131	0.267919	-5.9022	3.58684e-09	3.42078e-08
ATP6V1E2	52.4511	-1.58172	0.314513	-5.0291	4.92793e-07	3.45503e-06
FSIP2	26.8395	-1.58201	0.535384	-2.9549	0.00312766	0.0102199
DTD2	59.0293	-1.58327	0.301798	-5.24612	1.55332e-07	1.17507e-06
SERPINA6	408.565	-1.58391	0.127748	-12.3987	2.65643e-35	2.06772e-33
IFI27L2	19.366	-1.58461	0.48909	-3.23992	0.00119563	0.00436447
BCL2L10	42.9581	-1.59006	0.337806	-4.70703	2.51358e-06	1.56176e-05
SUSD3	14.3213	-1.59048	0.590823	-2.69197	0.00710316	0.0208624
CD3G	45.9716	-1.59086	0.32044	-4.96461	6.88405e-07	4.71269e-06
AADAC	149.785	-1.59408	0.198269	-8.04	8.98406e-16	1.79016e-14
CSF3R	17.6711	-1.59419	0.52953	-3.01058	0.00260752	0.00870855
SLC7A2	2480.18	-1.5978	0.081668	-19.5646	3.10114e-85	8.86344e-83
SH2D2A	30.1646	-1.60123	0.400757	-3.99552	6.45522e-05	0.000311636
DNAH6	87.2013	-1.60417	0.254633	-6.29994	2.97765e-10	3.26078e-09
CPAMD8	18.9499	-1.60524	0.529119	-3.03379	0.00241499	0.00814286
CLDN16	69.5616	-1.6097	0.264101	-6.09503	1.0942e-09	1.12318e-08
IRAK1BP1	10.7579	-1.61006	0.663934	-2.42502	0.0153074	0.0402831
GPAM	1912.89	-1.61343	0.0858898	-18.7848	1.00474e-78	2.4836e-76
ALDH3A1	27.274	-1.6185	0.41687	-3.88249	0.000103392	0.000481477
METTL7A	96.2753	-1.62159	0.23633	-6.86158	6.81018e-12	9.11946e-11
ZFHX2	18.1585	-1.62563	0.551755	-2.94629	0.00321609	0.0104716
H2BU1	18.3764	-1.62568	0.533083	-3.04957	0.00229168	0.00777869
VWA2	35.5194	-1.62684	0.370718	-4.38833	1.14222e-05	6.36996e-05
SLC22A9	411.677	-1.63324	0.123189	-13.258	4.05676e-40	3.92626e-38
CYP4F12	76.6851	-1.63528	0.259189	-6.30922	2.80454e-10	3.08482e-09
LGR5	294.5	-1.64064	0.141207	-11.6187	3.31074e-31	2.03221e-29
SLC10A2	23.7694	-1.65578	0.472835	-3.50181	0.000462109	0.00186763
MOGAT2	48.6517	-1.67441	0.337173	-4.96602	6.83399e-07	4.68368e-06
PDE3A	14.712	-1.67495	0.559361	-2.9944	0.00274981	0.00911224
SFTA2	17.1109	-1.68458	0.54014	-3.11879	0.00181595	0.00634647
MMP11	264.809	-1.6874	0.143442	-11.7636	6.00925e-32	3.77736e-30
ATP6V0D2	22.8002	-1.68927	0.501067	-3.37135	0.000748002	0.00286663
HEPACAM2	2347.66	-1.69704	0.0722002	-23.5046	3.66293e-122	1.86118e-119
SLC25A21	20.8467	-1.69733	0.477128	-3.55739	0.000374553	0.00155042
SOX5	149.421	-1.69923	0.2033	-8.35823	6.36663e-17	1.39806e-15
CYP2C9	173.222	-1.70101	0.176261	-9.65056	4.88876e-22	1.59688e-20
SLC38A4	918.441	-1.70541	0.108506	-15.7173	1.15187e-55	1.74132e-53
YY2	13.9598	-1.70783	0.638727	-2.67381	0.00749949	0.0218894
SLC26A7	9.86795	-1.7098	0.69418	-2.46305	0.0137763	0.0368038
RHBG	184.452	-1.71319	0.169355	-10.116	4.69253e-24	1.75893e-22
ORM1	552.709	-1.72082	0.108777	-15.8196	2.27757e-56	3.56079e-54
CLEC3A	15.9556	-1.72622	0.539572	-3.19924	0.0013779	0.00495274
MFSD4A	21.2679	-1.72713	0.533483	-3.23745	0.00120602	0.00439716
TPRG1	24.3162	-1.72841	0.477426	-3.62027	0.000294301	0.00124586
NCMAP	44.7521	-1.72945	0.336304	-5.14252	2.71074e-07	1.97935e-06
WEE2	96.5783	-1.74085	0.237401	-7.33295	2.25137e-13	3.54712e-12
PLXDC2	39.6684	-1.75002	0.351958	-4.97223	6.61876e-07	4.55152e-06
GDF9	9.47456	-1.7519	0.711447	-2.46244	0.0137995	0.0368496
GREB1	16.125	-1.75209	0.575232	-3.04589	0.00231991	0.00785267
NFE2	35.5002	-1.75422	0.399794	-4.3878	1.14504e-05	6.38375e-05
SCGN	759.483	-1.75627	0.0993104	-17.6846	5.50726e-70	1.14476e-67
CCDC148	14.5925	-1.75897	0.579978	-3.03283	0.00242275	0.0081645
KLF15	28.8231	-1.76647	0.408001	-4.32958	1.49391e-05	8.17673e-05
GLDN	23.0283	-1.76924	0.451008	-3.92285	8.75076e-05	0.000412868
GDPD1	25.673	-1.76925	0.450984	-3.92308	8.74233e-05	0.000412577
FO681492.1	16.2872	-1.7757	0.59957	-2.96163	0.00306016	0.0100262
SLC13A2	44.7455	-1.77911	0.333454	-5.3354	9.53333e-08	7.44275e-07
STUM	203.322	-1.78205	0.190668	-9.34639	9.06934e-21	2.66286e-19
CD4	17.4099	-1.78294	0.562923	-3.16729	0.00153864	0.00547246
NHLRC1	34.0381	-1.78392	0.3926	-4.54386	5.52342e-06	3.25812e-05
SPA17	15.7625	-1.78509	0.572017	-3.12069	0.00180428	0.00631169
ZNF117	77.6752	-1.7859	0.267458	-6.67733	2.43332e-11	3.02791e-10
FZD2	61.4654	-1.79428	0.284158	-6.31436	2.7129e-10	2.99122e-09
NEB	640.764	-1.79909	0.106701	-16.861	8.70455e-64	1.57647e-61
HOXA9	21.6378	-1.80312	0.501313	-3.59679	0.000322173	0.00135196
TRIM67	20.7771	-1.80823	0.507519	-3.56288	0.000366812	0.0015201
KLLN	36.5437	-1.81736	0.369238	-4.92191	8.57027e-07	5.78478e-06
FUZ	11.4554	-1.81997	0.670236	-2.71542	0.00661911	0.019633
ZNF772	15.4063	-1.82771	0.567126	-3.22276	0.0012696	0.00460055
UGT2B17	281.46	-1.84054	0.180528	-10.1953	2.08035e-24	8.06225e-23
HOXA7	9.91986	-1.84746	0.736961	-2.50686	0.012181	0.0331421
CCR3	7.87226	-1.84974	0.793367	-2.33151	0.0197264	0.0499151
CFAP43	22.6828	-1.85505	0.487425	-3.80583	0.000141331	0.000641976
CX3CL1	10.5128	-1.87026	0.743313	-2.51611	0.0118658	0.0324244
KLHDC1	10.3449	-1.8805	0.719315	-2.61429	0.00894136	0.025465
ARHGAP30	46.5226	-1.88553	0.335652	-5.61754	1.937e-08	1.67288e-07
TM4SF4	133.757	-1.89645	0.20282	-9.35039	8.73234e-21	2.57632e-19
HECW2	23.4719	-1.89707	0.522951	-3.62761	0.000286052	0.00121488
ZNF763	7.8172	-1.90988	0.804612	-2.37366	0.0176128	0.0453191
HS3ST3B1	9.03494	-1.91214	0.765044	-2.49939	0.0124408	0.0337288
FLG	9.77391	-1.9467	0.709342	-2.74437	0.00606263	0.0181799
ANGPTL3	110.295	-1.95314	0.248737	-7.85225	4.08643e-15	7.58103e-14
CCDC71L	9.6701	-1.95778	0.743568	-2.63296	0.00846446	0.0242835
NLRP6	10.8123	-1.96549	0.687419	-2.85923	0.00424671	0.0133541
DEFB1	254.141	-1.96616	0.150931	-13.0269	8.60722e-39	7.75582e-37
ANKRD31	27.516	-1.98637	0.427714	-4.64417	3.41452e-06	2.08264e-05
KLRG1	11.8629	-1.98848	0.650247	-3.05804	0.00222791	0.00758758
ACTG2	7.71658	-1.99827	0.851491	-2.34679	0.0189359	0.0481879
CCDC78	33.3718	-2.00216	0.44805	-4.46861	7.87284e-06	4.52009e-05
DNAH11	41.644	-2.01113	0.387191	-5.19415	2.0566e-07	1.52924e-06
C12orf56	94.3684	-2.01604	0.238852	-8.44055	3.15861e-17	7.03744e-16
WDR88	18.5276	-2.01621	0.539172	-3.73945	0.000184423	0.000818604
CFTR	3756.56	-2.01637	0.0735372	-27.4197	1.59513e-165	1.26861e-162
FYB2	74.5954	-2.03469	0.267982	-7.59262	3.13509e-14	5.41521e-13
ARHGEF38	101.913	-2.05675	0.239011	-8.60527	7.61353e-18	1.7809e-16
ELOVL2	12.0814	-2.05839	0.649283	-3.17025	0.00152307	0.00542128
PDGFRB	503.497	-2.07312	0.121254	-17.0973	1.55353e-65	2.96012e-63
FER1L5	30.8392	-2.07672	0.426067	-4.87418	1.09263e-06	7.25984e-06
HECTD2	9.2494	-2.07988	0.826552	-2.51633	0.0118583	0.0324136
TECTB	14.7999	-2.07996	0.609716	-3.41135	0.000646416	0.00251687
ATP13A4	84.6887	-2.08533	0.271479	-7.68135	1.57415e-14	2.77402e-13
FAM217A	7.01583	-2.08907	0.849331	-2.45967	0.0139066	0.0370762
PCDHGB6	16.1034	-2.09026	0.563543	-3.70914	0.000207961	0.000909619
TCF24	8.70795	-2.09089	0.766568	-2.7276	0.00637969	0.0190278
KCNK10	66.0601	-2.09411	0.294009	-7.12262	1.05895e-12	1.5596e-11
HPR	43.5308	-2.13285	0.3436	-6.20736	5.38832e-10	5.73042e-09
NUDT6	31.1146	-2.15074	0.414187	-5.19268	2.07292e-07	1.5395e-06
SMPX	13.127	-2.15605	0.652292	-3.30534	0.000948601	0.00355279
RELN	6.5573	-2.16043	0.897487	-2.4072	0.0160753	0.0419113
CYTIP	9.15807	-2.16384	0.753693	-2.87098	0.00409203	0.012921
SLC1A2	13.7037	-2.16839	0.619944	-3.49773	0.000469244	0.0018927
SCUBE2	11.7586	-2.17348	0.710438	-3.05936	0.00221813	0.00756132
SLC9C1	17.9241	-2.19652	0.557824	-3.93765	8.22833e-05	0.000390435
CNTD2	17.7705	-2.20575	0.544251	-4.05282	5.06046e-05	0.00024937
SEC16B	8.53641	-2.20847	0.798289	-2.7665	0.00566609	0.0171511
UGT2B10	79.8511	-2.21557	0.267238	-8.29062	1.12662e-16	2.42735e-15
ADH4	539.46	-2.21755	0.132764	-16.703	1.24703e-62	2.17245e-60
FAM72A	12.5595	-2.22941	0.662787	-3.36368	0.000769094	0.00294315
MRC2	62.4004	-2.23122	0.305108	-7.31289	2.61462e-13	4.09825e-12
PKDREJ	12.5107	-2.24956	0.647562	-3.47389	0.000512972	0.00204786
UGT2B15	135.266	-2.25753	0.214387	-10.5302	6.27253e-26	2.63158e-24
PNMA5	5.95242	-2.26389	0.936984	-2.41615	0.0156858	0.0411125
PIF1	88.1399	-2.27676	0.266133	-8.55499	1.1788e-17	2.7157e-16
EHF	63.6745	-2.28316	0.29649	-7.70062	1.35409e-14	2.39545e-13
ROS1	13.974	-2.29457	0.626889	-3.66025	0.000251968	0.00108345
SLC14A2	36.0706	-2.29483	0.408404	-5.61901	1.92052e-08	1.66239e-07
ATP10B	154.228	-2.29569	0.208293	-11.0215	3.01063e-28	1.48039e-26
PAH	129.203	-2.32541	0.209508	-11.0994	1.26338e-28	6.41937e-27
DNAH3	98.8549	-2.3558	0.239308	-9.84425	7.25802e-23	2.47232e-21
CTTNBP2	40.7898	-2.35658	0.384947	-6.12185	9.24978e-10	9.58623e-09
APOBR	31.7043	-2.38594	0.419459	-5.68813	1.28438e-08	1.14202e-07
SHD	6.11152	-2.39706	0.988805	-2.4242	0.0153421	0.0403523
FBP1	29.5294	-2.40154	0.430847	-5.574	2.48956e-08	2.11711e-07
MYBPH	9.7095	-2.40923	0.790699	-3.04695	0.00231173	0.00783222
TSPAN32	14.9571	-2.41841	0.609172	-3.96999	7.18749e-05	0.000344894
IL27	8.63524	-2.44508	0.805645	-3.03493	0.00240593	0.00811679
ACSM2B	14.0846	-2.44609	0.645371	-3.7902	0.000150524	0.000680352
ACP5	7.48329	-2.44667	0.887089	-2.75809	0.0058141	0.0175469
FAM186B	17.2402	-2.45295	0.575641	-4.26125	2.03285e-05	0.00010876
AK7	8.67642	-2.45305	0.826611	-2.9676	0.0030013	0.00985987
GABRR1	10.0977	-2.46917	0.758	-3.25748	0.00112407	0.00413047
VANGL2	16.7017	-2.4864	0.581986	-4.27226	1.93499e-05	0.000103767
UPK3A	24.2087	-2.48745	0.499222	-4.98266	6.27161e-07	4.33234e-06
TNNI3	5.58861	-2.49593	0.996449	-2.50483	0.0122511	0.0332785
TOMM20L	6.56622	-2.50051	0.923147	-2.70868	0.00675505	0.0199714
CAPN9	11.2309	-2.51204	0.720337	-3.48731	0.000487898	0.0019563
ACOT12	17.4671	-2.52702	0.607056	-4.16275	3.14443e-05	0.000162343
FABP5	17.3383	-2.55771	0.586697	-4.35951	1.30355e-05	7.22563e-05
DHRS2	122.425	-2.56406	0.23087	-11.1061	1.17176e-28	5.97043e-27
OPRD1	5.91578	-2.60957	0.992449	-2.62943	0.00855282	0.0244948
ADAM11	7.12741	-2.60982	0.909372	-2.86992	0.00410576	0.0129599
DPPA3	4.83719	-2.61529	1.09065	-2.39793	0.016488	0.0428345
AFM	44.7381	-2.6508	0.386455	-6.85927	6.92112e-12	9.25446e-11
DRC7	7.64479	-2.68063	0.900159	-2.97795	0.00290182	0.00956397
FAM189A1	5.06386	-2.68846	1.10128	-2.44123	0.0146374	0.0387985
PIANP	4.93159	-2.69474	1.10162	-2.44616	0.0144385	0.0383379
AGXT	7.533	-2.69672	0.877503	-3.07318	0.00211794	0.00726036
RNASE2	8.90887	-2.70137	0.815196	-3.31376	0.000920493	0.00345813
FMO2	5.11696	-2.72659	1.08457	-2.51399	0.0119375	0.0325862
VSTM5	29.9007	-2.74085	1.06645	-2.57007	0.0101677	0.0284239
GPR135	5.1402	-2.7433	1.07708	-2.54698	0.0108659	0.0301013
TRIM50	12.1504	-2.80684	0.726804	-3.8619	0.000112509	0.000520883
COLQ	8.58577	-2.9023	0.845107	-3.43424	0.000594211	0.00233147
SLC22A25	14.0972	-2.90301	0.691883	-4.1958	2.71906e-05	0.000142147
ABCA6	8.73033	-2.90836	0.880595	-3.30273	0.000957499	0.00358144
TAS2R38	5.63561	-2.91931	1.0688	-2.7314	0.00630657	0.0188281
RASL11B	4.39261	-2.94461	1.19232	-2.46965	0.0135245	0.0362106
SH2D6	13.81	-3.03298	0.686041	-4.42099	9.82506e-06	5.54008e-05
AL590560.2	4.64866	-3.09726	1.21239	-2.55466	0.0106291	0.0295078
VNN3	4.9697	-3.09998	1.18656	-2.61257	0.00898643	0.0255764
AC108941.2	6.46596	-3.14265	1.02119	-3.07745	0.00208777	0.0071764
CFAP221	22.2936	-3.1998	0.560024	-5.71369	1.10549e-08	9.92717e-08
PERCC1	3.60909	-3.28545	1.38308	-2.37547	0.0175268	0.0451168
SLC10A4	5.6445	-3.3506	1.11353	-3.00899	0.00262118	0.00874778
ZNF429	3.81129	-3.38187	1.38105	-2.44876	0.0143348	0.0380957
HFM1	4.1767	-3.51042	1.36189	-2.57761	0.0099487	0.027896
ADH1B	32.0298	-3.52706	0.521877	-6.75841	1.39517e-11	1.79975e-10
ENPP6	4.33668	-3.58076	1.34629	-2.65973	0.00782042	0.0226993
KIAA1324	5.34814	-3.93366	1.30999	-3.00281	0.00267501	0.00890145
TDO2	21.0445	-4.08473	0.69021	-5.9181	3.25683e-09	3.13052e-08
SCN3A	5.05098	-4.74983	1.4365	-3.30654	0.000944558	0.00353959
FAM72D	5.43489	-4.86426	1.41433	-3.43927	0.000583291	0.00229256

## Sheet: dCaco-2_CoCl2
The full list of differentially expressed genes in differentiated Caco-2 cells upon cobalt (II) chlolide treatment.
Gene Symbol	baseMean	log2FoldChange	lfcSE	stat	pvalue	padj
MT1H	32.8976	8.54777	1.23087	6.94448	3.79862e-12	3.21497e-11
MT2A	3309.61	6.87196	0.367814	18.6833	6.77648e-78	7.07353e-76
MT1X	1156.53	6.49873	0.365858	17.763	1.36744e-70	1.19312e-68
CCL26	12.06	6.11839	1.29372	4.72931	2.25284e-06	1.08649e-05
NRN1	43.4191	6.0704	0.779728	7.78528	6.95591e-15	7.19838e-14
MMP13	10.0618	5.86564	1.32167	4.43806	9.07749e-06	4.04269e-05
MT1G	83.447	5.84226	0.52689	11.0882	1.43155e-28	3.15882e-27
CA9	4.52398	5.69566	1.47851	3.85229	0.000117016	0.000442147
PTPRN	7.97657	5.51857	1.34802	4.09384	4.24283e-05	0.00017197
ANKRD37	265.035	5.50234	0.283363	19.418	5.43706e-84	6.24579e-82
VEGFD	12.9697	5.32525	1.14666	4.64413	3.41515e-06	1.60936e-05
FOSL1	243.389	5.17779	0.266208	19.4502	2.90442e-84	3.35329e-82
CCDC110	3.11175	5.17377	1.65242	3.13103	0.00174195	0.00538412
HMOX1	4705.31	5.12747	0.088687	57.8153	0	0
MT1E	313.413	5.11614	0.233292	21.9302	1.33796e-106	2.20041e-104
CCDC13	3.01316	5.10049	1.60063	3.18655	0.0014398	0.004533
C4orf47	16.1811	5.05211	0.972838	5.19317	2.06743e-07	1.13446e-06
KCNN1	2.39189	4.78018	1.71066	2.79434	0.0052005	0.0144539
ARMH4	2.3745	4.77035	1.71264	2.78538	0.00534654	0.014817
KRT6A	4.74538	4.72922	1.49165	3.17046	0.00152197	0.00476411
MMP9	2.26699	4.69706	1.73953	2.7002	0.00692987	0.018679
STX11	4.52674	4.68237	1.4685	3.18853	0.00142998	0.0045039
RPTN	2.21274	4.68206	1.81446	2.58041	0.00986818	0.0256465
HBA1	2.22221	4.67189	1.78234	2.62121	0.00876186	0.0230729
NPR3	7.75995	4.58461	1.22973	3.72813	0.000192906	0.000705011
CACNA1I	2.00664	4.49264	1.81246	2.47875	0.0131844	0.0331276
TUSC3	4.03344	4.4757	1.5231	2.93853	0.00329768	0.00960807
SLC43A3	7.24317	4.46079	1.23457	3.61324	0.000302399	0.00107093
CFAP47	3.90209	4.4531	1.50256	2.96368	0.00303982	0.00891682
SUMO4	14.314	4.44408	0.886115	5.01525	5.29656e-07	2.76311e-06
ENO2	3016.41	4.42477	0.0885015	49.9966	0	0
GAST	3.77913	4.40264	1.53297	2.87197	0.00407925	0.011639
TNFSF9	54.8465	4.35278	0.446534	9.74794	1.88253e-22	3.08935e-21
PPFIA4	554.351	4.2678	0.153696	27.7678	1.06288e-169	3.73807e-167
TRIM54	3.4575	4.25694	1.54239	2.75996	0.00578089	0.0159065
FOS	647.682	4.24529	0.141549	29.9916	1.26117e-197	6.00633e-195
STYK1	232.134	4.22706	0.220529	19.1678	6.87276e-82	7.55343e-80
HSPA6	89.8581	4.20612	0.342788	12.2703	1.30696e-34	3.95723e-33
ITGA5	637.321	4.185	0.13844	30.2298	9.61122e-201	4.77636e-198
SLC2A3	46978.4	4.15873	0.0622056	66.8547	0	0
MT1F	1117.01	4.10063	0.12542	32.6951	1.83376e-234	1.39733e-231
CCL20	209.893	4.03644	0.216542	18.6405	1.50873e-77	1.55358e-75
MAFF	677.641	3.98116	0.132232	30.1074	3.87551e-199	1.88498e-196
PFKFB4	2227.92	3.97856	0.100128	39.7348	0	0
SLC39A2	5.2593	3.96328	1.31568	3.01235	0.00259235	0.00772938
PEAR1	7.7802	3.94118	1.08558	3.63048	0.000282894	0.00100622
C3AR1	2.78089	3.92777	1.66604	2.35755	0.0183959	0.04451
AQP10	449.62	3.91762	0.414308	9.45583	3.20482e-21	4.83578e-20
COLEC11	2.69641	3.8972	1.63299	2.38654	0.0170077	0.0415425
DDIT4	933.748	3.85976	0.135735	28.436	7.25083e-178	2.80939e-175
FOSB	30.4486	3.8506	1.09211	3.52585	0.000422119	0.00145787
GPRC5A	13499.9	3.84686	0.0655124	58.7196	0	0
BMP6	30.8786	3.81527	0.537157	7.10271	1.22334e-12	1.07025e-11
GDF15	774.432	3.79666	0.135724	27.9735	3.41716e-172	1.23994e-169
SLC6A8	1420.44	3.77654	0.11468	32.9311	7.88841e-238	6.21824e-235
RBM11	51.0922	3.76355	0.418865	8.98513	2.58426e-19	3.53115e-18
DUSP13	44.6313	3.70661	0.429815	8.62373	6.48093e-18	8.11359e-17
SERPINE1	23.2743	3.63986	0.58516	6.22028	4.96283e-10	3.53758e-09
CXCR4	38.229	3.63535	0.475648	7.64294	2.12315e-14	2.10931e-13
RNF183	161.735	3.6296	0.225196	16.1175	1.92242e-58	1.28499e-56
BNIP3	4077.83	3.5914	0.0700336	51.2811	0	0
MLLT11	130.136	3.57894	0.260659	13.7303	6.68303e-43	2.78277e-41
HK2	3047.63	3.57381	0.071655	49.8752	0	0
ALDOA	368.208	3.55939	0.184941	19.246	1.52418e-82	1.69965e-80
SLC16A3	527.042	3.54422	0.148223	23.9115	2.32663e-126	4.74883e-124
ZNF280A	105.846	3.52816	0.272789	12.9336	2.90721e-38	1.03197e-36
OSCAR	4.02039	3.52535	1.40368	2.51151	0.0120216	0.030545
NPPB	59.3171	3.51591	0.360751	9.74607	1.91757e-22	3.1446e-21
TEX19	68.2398	3.51507	0.352016	9.98553	1.76352e-23	3.04948e-22
AP003071.5	144.331	3.5048	0.251969	13.9096	5.53546e-44	2.37412e-42
ADM	812.52	3.48779	0.119102	29.2839	1.66215e-188	7.03644e-186
EMP1	3722.77	3.48073	0.0752564	46.2516	0	0
CXCL8	5.4755	3.44292	1.19376	2.8841	0.00392538	0.0112477
MAP1A	314.871	3.40503	0.159714	21.3195	7.48223e-101	1.14029e-98
KLRD1	5.29318	3.39336	1.20211	2.82284	0.00475998	0.0133677
ATP8B2	672.174	3.37423	0.138154	24.4236	9.59591e-132	2.19363e-129
TFAP2C	674.842	3.35486	0.115972	28.9281	5.29711e-184	2.20167e-181
MPZ	9.06383	3.35423	0.910983	3.68199	0.000231421	0.000835385
PDK1	1961.07	3.35087	0.0903026	37.1071	2.15891e-301	2.74181e-298
B3GNT4	31.3547	3.3399	0.515392	6.4803	9.15407e-11	6.9453e-10
HILPDA	831.512	3.33435	0.110039	30.3016	1.09145e-201	5.54457e-199
CLC	18.7225	3.25274	0.624873	5.20545	1.93524e-07	1.0673e-06
GCNT3	657.276	3.24586	0.135142	24.0181	1.79871e-127	3.73804e-125
CKB	30437.8	3.2429	0.0899543	36.0505	1.35449e-284	1.40744e-281
FUT11	751.916	3.23976	0.109107	29.6933	9.36503e-194	4.19774e-191
SLC2A1	12808.8	3.2165	0.0684722	46.9753	0	0
HERC3	12.59	3.19485	0.757688	4.21658	2.4804e-05	0.000104212
JUN	870.449	3.18407	0.117672	27.0588	3.01158e-161	9.56176e-159
EFNA3	145.402	3.16762	0.22961	13.7957	2.70607e-43	1.14134e-41
HSPA1A	2550.91	3.16744	0.0730158	43.3802	0	0
CYP26A1	7.76243	3.15967	0.921201	3.42995	0.000603704	0.00202802
BHLHE40	2032.58	3.15138	0.0897136	35.1272	2.59573e-270	2.47244e-267
SCN1B	104.452	3.14531	0.264671	11.8839	1.43588e-32	3.93577e-31
EID3	4.70808	3.12864	1.21059	2.58439	0.00975522	0.0253818
UGT1A1	13.6975	3.1142	0.697075	4.46753	7.91285e-06	3.55195e-05
SLC2A14	1402.69	3.11342	0.0967507	32.1798	3.38008e-227	2.2726e-224
OSGIN1	1044.65	3.11001	0.116661	26.6586	1.42228e-156	4.22252e-154
P4HA1	8925.7	3.08901	0.0614317	50.2837	0	0
TRIM36	8.87727	3.06173	0.907858	3.37248	0.000744953	0.00246735
ATG9B	29.4571	3.04398	0.484431	6.28362	3.30789e-10	2.3983e-09
TCAF2	20.3578	3.00758	0.564934	5.32377	1.01639e-07	5.75826e-07
TMEM145	33.8328	2.97944	0.450642	6.61154	3.80344e-11	2.97253e-10
PDE2A	8.54871	2.97904	0.863966	3.4481	0.000564546	0.00190797
EGLN1	207.696	2.97005	0.191811	15.4843	4.43196e-54	2.6384e-52
DUSP1	608.322	2.94618	0.121011	24.3463	6.34616e-131	1.39493e-128
PFKP	1518.51	2.94601	0.109658	26.8654	5.56746e-159	1.69696e-156
JAKMIP3	47.2147	2.94064	0.382086	7.69627	1.40092e-14	1.41328e-13
H1-4	4.07413	2.9388	1.262	2.32867	0.0198763	0.0475783
S100G	69.1996	2.93445	0.312706	9.38405	6.3485e-21	9.46684e-20
GADD45G	46.4575	2.93384	0.370689	7.91455	2.48156e-15	2.63241e-14
CBFA2T3	30.6132	2.93244	0.471224	6.22302	4.87681e-10	3.47844e-09
ZFAND2A	895.364	2.92227	0.102196	28.5946	7.83971e-180	3.14414e-177
GRIP1	4.19531	2.92085	1.22184	2.39053	0.0168241	0.0411599
LOX	494.747	2.913	0.125109	23.2837	6.48331e-120	1.24545e-117
CABP7	4.14404	2.91259	1.22552	2.37662	0.0174721	0.0425133
PLK3	103.69	2.90374	0.271099	10.711	9.03765e-27	1.83972e-25
PPBP	48.5715	2.90161	0.359128	8.07961	6.49765e-16	7.15148e-15
EGLN3	282.514	2.90061	0.158029	18.3549	3.01709e-75	2.87378e-73
NIM1K	10.8316	2.89306	0.758238	3.81551	0.000135904	0.000508138
AC093827.5	5.28049	2.88935	1.0655	2.71173	0.00669331	0.0181162
ATF3	286.375	2.883	0.155579	18.5308	1.16564e-76	1.15353e-74
PIR	460.808	2.88277	0.13128	21.9589	7.11239e-107	1.18678e-104
NDRG1	17531.6	2.88056	0.0693198	41.5546	0	0
CIART	253.607	2.87948	0.16653	17.2911	5.49025e-67	4.46645e-65
RELT	184.909	2.87914	0.189863	15.1643	6.09455e-52	3.42313e-50
H1-6	5.33356	2.86884	1.12277	2.55515	0.0106142	0.0273551
FGF11	9.19158	2.84822	0.807923	3.52537	0.000422899	0.0014599
PCOLCE2	5.06885	2.81148	1.09224	2.57406	0.0100513	0.0260514
PFKFB3	2343	2.80262	0.0842124	33.2804	7.42882e-243	6.28974e-240
PRTN3	7.71086	2.79546	0.902687	3.09682	0.00195609	0.00599475
DUSP5	1045.71	2.78803	0.099124	28.1267	4.61647e-174	1.70214e-171
GPX2	846.818	2.77096	0.101446	27.3146	2.84473e-164	9.5633e-162
ERO1A	5895.03	2.7692	0.0725147	38.1881	0	0
PLAUR	104.971	2.76373	0.264826	10.436	1.69759e-25	3.24472e-24
RNF223	8.79232	2.76148	0.831614	3.32063	0.00089816	0.00293146
LDHA	30048	2.75773	0.056475	48.831	0	0
GAPDH	64602.3	2.75127	0.0614353	44.7832	0	0
FAM219A	662.666	2.73596	0.124677	21.9443	9.8095e-107	1.62497e-104
SMIM38	10.8898	2.73085	0.764341	3.57282	0.000353162	0.00123709
AL031708.1	20.2127	2.71533	0.553901	4.9022	9.47699e-07	4.79938e-06
FUT3	5.89223	2.70615	0.991557	2.7292	0.00634888	0.0172863
SPAG4	370.891	2.67611	0.15655	17.0943	1.63624e-65	1.26366e-63
UPK1A	7.22635	2.67032	0.933656	2.86007	0.00423544	0.0120291
BNIP3L	2526.66	2.64526	0.0811893	32.5813	7.53714e-233	5.55803e-230
GADD45A	740.371	2.62282	0.106665	24.5894	1.64098e-133	3.82784e-131
TNFRSF11A	7.78691	2.61354	0.870743	3.00151	0.00268646	0.00798706
GCLM	461.499	2.60926	0.122487	21.3024	1.07874e-100	1.63311e-98
CLIP4	14.8747	2.60904	0.630558	4.13766	3.50862e-05	0.000143972
ID1	174.51	2.59198	0.195941	13.2284	6.01939e-40	2.2521e-38
PHLDA2	59.9722	2.57424	0.314418	8.18731	2.67119e-16	3.01697e-15
EEF1A2	80.5653	2.56808	0.270824	9.48244	2.48401e-21	3.76555e-20
PANX2	39.4064	2.56316	0.381043	6.72669	1.73563e-11	1.3868e-10
HELB	103.829	2.55498	0.279787	9.1319	6.73098e-20	9.53938e-19
ZFP36	1550.98	2.53413	0.09292	27.2722	9.06952e-164	3.00477e-161
INSIG2	1328.17	2.52891	0.0998949	25.3157	2.14315e-141	5.44361e-139
FAM13A	2582.55	2.52109	0.0759118	33.2107	7.53561e-242	6.15229e-239
SCN5A	62.384	2.50256	0.308303	8.11723	4.76926e-16	5.30537e-15
B4GALNT1	75.6925	2.50058	0.27514	9.0884	1.0051e-19	1.40788e-18
CHST7	46.1778	2.49236	0.368104	6.77079	1.28077e-11	1.03531e-10
WNT9A	24.0528	2.48428	0.483125	5.14211	2.71668e-07	1.4692e-06
KLF6	3093	2.48385	0.0700713	35.4475	3.16652e-275	3.14724e-272
NGFR	11.4501	2.48338	0.696103	3.56755	0.000360334	0.00125894
KLF9	8.18302	2.46651	0.83438	2.95611	0.0031155	0.00912263
CEP295NL	12.4145	2.45612	0.678113	3.62199	0.000292342	0.00103692
SAT1	5833.81	2.4469	0.0675722	36.2116	4.002e-287	4.35646e-284
CRYAB	54.4488	2.4456	0.332454	7.35622	1.89188e-13	1.76308e-12
TXNRD1	5273.5	2.441	0.0662922	36.8218	8.27118e-297	9.95154e-294
UFD1	2417.79	2.43924	0.0754087	32.347	1.52956e-229	1.05957e-226
PLOD2	4794.37	2.43161	0.0844476	28.7943	2.53171e-182	1.03348e-179
DUSP6	480.957	2.42964	0.11843	20.5154	1.56715e-93	2.10735e-91
DRC1	8.98881	2.42665	0.79092	3.06813	0.002154	0.00654097
FAM241B	308.637	2.42544	0.146439	16.5628	1.29443e-61	9.30524e-60
ENO1	26713.3	2.41901	0.0637343	37.9546	0	0
ANXA1	75.8329	2.41745	0.274265	8.81427	1.20468e-18	1.57635e-17
EPHA2	850.251	2.41621	0.106799	22.6239	2.52038e-113	4.53668e-111
SQSTM1	5685.68	2.41517	0.0786214	30.719	3.16995e-207	1.76744e-204
KRT6C	13.9113	2.41389	0.676725	3.56702	0.000361068	0.00126131
HSPA1B	1103.78	2.41317	0.0936075	25.7797	1.4977e-146	3.93533e-144
BNIP5	209.664	2.40431	0.170654	14.0888	4.45054e-45	1.99099e-43
GBE1	399.415	2.40366	0.134475	17.8744	1.8673e-71	1.66744e-69
UCHL1	811.322	2.39679	0.108542	22.0817	4.74063e-108	8.08738e-106
GLA	1245.34	2.39388	0.0859443	27.8539	9.66368e-171	3.45174e-168
ADGRF2	190.793	2.39257	0.181396	13.1898	1.00481e-39	3.71081e-38
LSMEM1	59.915	2.39087	0.316706	7.54918	4.37999e-14	4.28074e-13
CRIP2	6.7915	2.3886	0.907238	2.63283	0.00846779	0.0223733
RAB5IF	133.517	2.38157	0.229408	10.3814	3.01372e-25	5.71258e-24
TBX15	7.81571	2.38153	0.86087	2.76642	0.00566752	0.0156209
EFNA1	4889.92	2.37242	0.0766715	30.9427	3.18935e-210	1.86945e-207
RIOK3	1841.04	2.37115	0.0901701	26.2964	2.10714e-152	5.80352e-150
NDRG4	236.125	2.36627	0.159862	14.8019	1.42362e-49	7.41318e-48
TMCC1	2109.85	2.36538	0.0788708	29.9905	1.30448e-197	6.08579e-195
PPP1R15A	3409.39	2.36285	0.0758996	31.1312	9.12006e-213	5.48644e-210
AL135905.2	57.1129	2.35801	0.327238	7.2058	5.77021e-13	5.18706e-12
PGK1	17866.4	2.35691	0.0532943	44.2244	0	0
TUBA1A	52.4544	2.35035	0.321117	7.3193	2.49263e-13	2.30321e-12
KIAA0319	208.399	2.34923	0.179099	13.1169	2.63413e-39	9.65025e-38
CLDN4	10247	2.34286	0.0766077	30.5825	2.0918e-205	1.11206e-202
H2BC21	653	2.34035	0.107665	21.7373	9.10057e-105	1.45482e-102
GPNMB	64.4874	2.33699	0.32129	7.27376	3.49614e-13	3.19879e-12
GABARAPL1	4067.96	2.33234	0.0641812	36.3399	3.78871e-289	4.33049e-286
RNF122	53.4111	2.32382	0.322398	7.20791	5.68167e-13	5.11149e-12
NMB	94.2725	2.31797	0.254399	9.11157	8.11997e-20	1.143e-18
CCDC81	42.7809	2.30997	0.374788	6.1634	7.11976e-10	4.99717e-09
P4HA2	2358.13	2.30616	0.0754064	30.583	2.05704e-205	1.11206e-202
FXYD5	451.157	2.29364	0.123521	18.5688	5.74911e-77	5.73906e-75
GPX3	4065.68	2.29059	0.0683737	33.5011	4.65241e-246	4.25417e-243
AC092718.3	9.53042	2.2886	0.766867	2.98435	0.00284182	0.00839545
TUBB3	22.503	2.28131	0.49947	4.56746	4.93671e-06	2.27115e-05
TPPP	29.9463	2.27177	0.430911	5.27202	1.34927e-07	7.53771e-07
SLC2A5	519.868	2.26629	0.139999	16.1879	6.13995e-59	4.16496e-57
DPCD	228.633	2.26367	0.162209	13.9553	2.92158e-44	1.26731e-42
RNF39	75.5899	2.25862	0.271908	8.30655	9.8522e-17	1.1421e-15
GABRA2	302.973	2.25699	0.165182	13.6637	1.67366e-42	6.83214e-41
ARHGAP45	576.438	2.2535	0.133951	16.8233	1.64771e-63	1.22693e-61
MAPT	32.5964	2.25294	0.433215	5.20052	1.98734e-07	1.09366e-06
PIK3CD	34.2775	2.23878	0.409764	5.46359	4.666e-08	2.74767e-07
APOA4	552.499	2.2365	0.273721	8.17075	3.06479e-16	3.4445e-15
GPR146	38.5017	2.23352	0.386305	5.78175	7.39276e-09	4.74715e-08
EBF2	16.0791	2.23324	0.580513	3.84702	0.000119564	0.000451178
LGI4	1068.82	2.23044	0.123601	18.0455	8.55781e-73	7.79408e-71
JUNB	282.891	2.22432	0.163831	13.5769	5.48975e-42	2.19333e-40
GPI	8428.23	2.22396	0.0684294	32.5	1.06476e-231	7.60637e-229
PROCR	51.5543	2.22141	0.339494	6.54331	6.0172e-11	4.62675e-10
PLIN2	3016.31	2.21247	0.0701163	31.5543	1.56398e-218	9.66283e-216
SLC20A1	3431.4	2.20828	0.069849	31.6151	2.29155e-219	1.45513e-216
DNAJB7	7.02875	2.20523	0.867623	2.5417	0.0110316	0.0283192
KDM3A	5385.54	2.2008	0.0747159	29.4556	1.0674e-190	4.69246e-188
AC090004.1	10.3196	2.1926	0.740543	2.9608	0.00306836	0.00899497
GADD45B	153.779	2.18695	0.198187	11.0348	2.59687e-28	5.65914e-27
UBASH3B	166.577	2.18172	0.190004	11.4825	1.61495e-30	3.89018e-29
MXD1	956.96	2.16099	0.105007	20.5795	4.1899e-94	5.66752e-92
JMJD6	904.783	2.15436	0.100832	21.3659	2.77737e-101	4.26111e-99
IL15RA	13.1462	2.15201	0.640585	3.35945	0.000780977	0.00257733
SOCS3	309.535	2.15083	0.146626	14.6689	1.02022e-48	5.11451e-47
GCNT7	19.9189	2.14517	0.515383	4.16229	3.15076e-05	0.000130459
TEC	104.405	2.14106	0.232081	9.22548	2.82296e-20	4.05357e-19
HSPB8	306.505	2.13952	0.151034	14.1658	1.49152e-45	6.71184e-44
RIMKLA	1096.46	2.12675	0.0904804	23.5051	3.62113e-122	7.07513e-120
PBX4	34.6887	2.12417	0.39182	5.4213	5.91686e-08	3.4505e-07
MAPRE3	260.211	2.11949	0.154505	13.7179	7.92907e-43	3.28367e-41
AIFM2	1089.25	2.10843	0.0914591	23.0533	1.3627e-117	2.55338e-115
UBC	25607.2	2.10155	0.0660054	31.8391	1.86493e-222	1.21807e-219
CITED2	1534.33	2.09254	0.082299	25.4261	1.29829e-142	3.3347e-140
TM4SF1	2789.97	2.08729	0.0858342	24.3177	1.2751e-130	2.77606e-128
TINAGL1	895.746	2.07982	0.0978153	21.2627	2.51261e-100	3.75413e-98
ADORA2B	39.5658	2.07785	0.366156	5.67475	1.38891e-08	8.66318e-08
RGS20	9.06905	2.07728	0.801665	2.59121	0.00956381	0.0249348
LDLR	4911.01	2.07325	0.073406	28.2436	1.70534e-175	6.39082e-173
NAA25	2246.62	2.06673	0.0783778	26.3688	3.12501e-153	8.71192e-151
AL136531.2	17.9521	2.05721	0.53107	3.8737	0.000107193	0.000407863
MAFG	1487.06	2.05691	0.0777394	26.4591	2.86753e-154	8.40408e-152
TNFAIP8	300.079	2.05671	0.157282	13.0766	4.48128e-39	1.62606e-37
LGALS14	1900.96	2.05475	0.109051	18.8421	3.40851e-79	3.64105e-77
RFFL	780.936	2.0531	0.0972164	21.1189	5.33063e-99	7.86182e-97
NNAT	217.746	2.04883	0.160605	12.757	2.85065e-37	9.75536e-36
LVRN	10.6795	2.04586	0.713228	2.86844	0.00412495	0.0117533
TGFB1	316.519	2.04353	0.152005	13.4438	3.3474e-41	1.30139e-39
RND3	1342.97	2.04308	0.0914688	22.3363	1.63933e-110	2.8607e-108
MRPS26	1830.09	2.03548	0.098712	20.6204	1.80001e-94	2.4493e-92
UNKL	519.659	2.03204	0.117816	17.2477	1.1651e-66	9.34531e-65
SLC26A5	10.6466	2.03188	0.75593	2.68792	0.00718986	0.019307
BHLHE41	21.3665	2.02852	0.496237	4.08781	4.35462e-05	0.000176002
MTFP1	16.1961	2.02618	0.567411	3.57092	0.000355732	0.00124476
ZNF460	139.855	2.01752	0.202948	9.94108	2.75824e-23	4.70197e-22
APOL2	779.734	2.0153	0.0990534	20.3456	5.08248e-92	6.67733e-90
FHL2	209.499	2.01325	0.172136	11.6957	1.34028e-31	3.4119e-30
H2BC9	394.861	2.01181	0.129548	15.5295	2.19103e-54	1.32156e-52
ELF3	3510.04	2.00817	0.0849493	23.6397	1.50783e-123	3.0236e-121
GCLC	1642.97	2.00442	0.0784771	25.5414	6.84266e-144	1.77754e-141
CREM	334.693	2.00109	0.133205	15.0227	5.21761e-51	2.87408e-49
PNCK	30.0707	1.99447	0.41153	4.84647	1.25676e-06	6.27693e-06
HBEGF	121.126	1.98874	0.220117	9.03493	1.64101e-19	2.26942e-18
ITGAM	24.1936	1.98335	0.487632	4.06732	4.75576e-05	0.0001912
ISM2	127.308	1.98104	0.22405	8.84194	9.40686e-19	1.24086e-17
NR4A1	256.105	1.97979	0.166361	11.9005	1.17631e-32	3.23591e-31
NRG4	9.97703	1.96842	0.725453	2.71337	0.00666026	0.0180352
ZC3H12D	63.0293	1.96713	0.282058	6.97422	3.07577e-12	2.62163e-11
TIAF1	213.703	1.95379	0.180117	10.8473	2.05381e-27	4.27595e-26
TXNDC5	20.8348	1.94955	0.494615	3.94155	8.09584e-05	0.000313892
GPAT3	483.951	1.94732	0.120641	16.1414	1.30612e-58	8.83373e-57
AK8	36.7956	1.94557	0.390031	4.98825	6.09275e-07	3.15399e-06
SYNDIG1L	36.3222	1.94539	0.392266	4.95937	7.07211e-07	3.62892e-06
PELO	858.827	1.94516	0.0967294	20.1093	6.11203e-90	7.59353e-88
RASSF1	468.029	1.94043	0.120902	16.0497	5.74461e-58	3.78449e-56
FTL	85637.1	1.93865	0.0648015	29.9168	1.19004e-196	5.44087e-194
CCL28	648.342	1.93855	0.102119	18.9832	2.34836e-80	2.55636e-78
DYSF	71.4797	1.93011	0.274794	7.02385	2.1584e-12	1.86192e-11
SNX10	70.8134	1.92329	0.275936	6.97004	3.1686e-12	2.69572e-11
IER3	68.1529	1.9229	0.296022	6.49582	8.25799e-11	6.29259e-10
OSER1	3217.11	1.91666	0.0673875	28.4424	6.0585e-178	2.38789e-175
BRF2	232.747	1.91628	0.160885	11.9109	1.03841e-32	2.87385e-31
NYAP1	18.8418	1.91406	0.546756	3.50076	0.00046393	0.00158883
PIM3	701.063	1.91344	0.120919	15.8241	2.12304e-56	1.35188e-54
MPZL3	2991.95	1.91124	0.0676341	28.2585	1.11993e-175	4.26692e-173
TMEM159	443.754	1.91007	0.12224	15.6256	4.87538e-55	3.00408e-53
GBP3	126.239	1.90764	0.20876	9.13798	6.36289e-20	9.0233e-19
RHOF	55.6843	1.90605	0.319024	5.97462	2.30622e-09	1.5515e-08
ME1	3251.95	1.9015	0.0836773	22.7242	2.58067e-114	4.71953e-112
TMEM92	1805.74	1.90029	0.0841614	22.5792	6.94405e-113	1.24016e-110
GLRX	1599.75	1.89795	0.0792203	23.9578	7.65911e-127	1.57736e-124
HSPA13	878.548	1.89763	0.101594	18.6786	7.38655e-78	7.6753e-76
ABCC1	612.902	1.8972	0.1127	16.8341	1.37276e-63	1.03228e-61
CCDC183	294.692	1.89565	0.167006	11.3508	7.35242e-30	1.70983e-28
FAM234B	251.13	1.89418	0.159874	11.8479	2.20521e-32	5.99417e-31
PKM	14596.3	1.88682	0.0621795	30.3447	2.94842e-202	1.53184e-199
BARX2	8.45006	1.88555	0.795176	2.37124	0.0177286	0.043064
PLEKHA2	555.237	1.88411	0.113275	16.633	4.01948e-62	2.93564e-60
CDA	82.8572	1.884	0.254218	7.41097	1.2538e-13	1.18193e-12
LRP8	171.856	1.88096	0.180725	10.4078	2.28348e-25	4.34641e-24
UPP1	71.8575	1.87852	0.271673	6.91464	4.69049e-12	3.94208e-11
KLHL21	1044.17	1.8725	0.0850619	22.0134	2.14525e-107	3.63262e-105
IGFBP2	42.3334	1.87246	0.384362	4.87159	1.10703e-06	5.56558e-06
PLAC8	290.397	1.86856	0.156199	11.9627	5.56984e-33	1.56806e-31
STC2	3356.24	1.86606	0.0757054	24.649	3.77189e-134	8.88922e-132
AC013394.1	11.1655	1.86366	0.669303	2.78447	0.00536148	0.0148454
LIMCH1	110.864	1.86363	0.226382	8.23225	1.83724e-16	2.10312e-15
TRIB1	826.954	1.86281	0.0968757	19.2289	2.12239e-82	2.35523e-80
PSMA6	113.854	1.86239	0.216219	8.61343	7.09078e-18	8.84799e-17
CP	159.748	1.85929	0.192707	9.64828	4.99866e-22	7.96302e-21
FSCN1	180.003	1.85718	0.186889	9.93738	2.86256e-23	4.87253e-22
MPP3	80.6661	1.85713	0.250902	7.40182	1.3433e-13	1.26422e-12
RHPN2	2024.17	1.85344	0.081463	22.7519	1.37537e-114	2.53556e-112
ANKRD1	723.622	1.85123	0.106204	17.4309	4.80444e-68	4.00837e-66
ZFAND5	909.346	1.84432	0.106708	17.2837	6.24115e-67	5.05932e-65
CLCF1	114.932	1.84422	0.227404	8.10989	5.06652e-16	5.62236e-15
SAP30	79.8036	1.84307	0.268676	6.85985	6.89327e-12	5.70322e-11
CEACAM1	1223.73	1.83418	0.0813358	22.5508	1.32e-112	2.33916e-110
F2RL1	5889.15	1.82881	0.0691366	26.4521	3.44733e-154	9.85074e-152
CXCL3	33.9765	1.82535	0.389127	4.69089	2.72015e-06	1.29872e-05
MXI1	1211.58	1.82507	0.0825796	22.1007	3.10887e-108	5.384e-106
CTH	288.109	1.82487	0.153227	11.9096	1.05492e-32	2.91251e-31
LNPK	1065.35	1.82397	0.0985268	18.5124	1.63881e-76	1.60786e-74
TMBIM1	8893.55	1.8236	0.0619682	29.4279	2.41167e-190	1.0402e-187
H4C5	48.2024	1.82241	0.335071	5.43888	5.36153e-08	3.13705e-07
IFIT2	121.515	1.82066	0.206463	8.81834	1.16172e-18	1.52276e-17
GNRH2	123.439	1.81956	0.54869	3.3162	0.000912507	0.00297362
DNAJC2	1858.83	1.81898	0.0926714	19.6283	8.86976e-86	1.05606e-83
IL6R	1063.18	1.80939	0.0860663	21.0232	4.02164e-98	5.85572e-96
FCHO1	10.7325	1.80515	0.691995	2.60862	0.00909083	0.0238705
BIRC3	144.79	1.80231	0.207151	8.70045	3.30583e-18	4.2101e-17
ALDOC	2068.6	1.79995	0.0763513	23.5745	7.03398e-123	1.38618e-120
PSMC4	3165.46	1.7991	0.0666892	26.9774	2.72376e-160	8.52948e-158
RNF24	842.401	1.79554	0.0910705	19.7159	1.57439e-86	1.91439e-84
ITGA2	1013.88	1.79147	0.0970546	18.4583	4.47041e-76	4.29384e-74
AKR1C2	3802.78	1.78652	0.0647139	27.6065	9.30689e-168	3.22357e-165
RAB30	332.791	1.78237	0.140369	12.6978	6.08359e-37	2.05422e-35
DUOXA2	12.7277	1.77997	0.608789	2.92379	0.00345803	0.010028
RAB20	583.801	1.77966	0.118042	15.0765	2.31117e-51	1.28548e-49
HKDC1	864.203	1.77644	0.0952561	18.6491	1.28344e-77	1.32757e-75
ETS1	57.5181	1.77453	0.292396	6.06894	1.28758e-09	8.863e-09
PNMA2	74.7884	1.77436	0.259761	6.83072	8.44901e-12	6.94764e-11
WDR54	180.728	1.77196	0.17431	10.1656	2.82508e-24	5.13774e-23
ORC1	384.888	1.77087	0.123474	14.342	1.19532e-46	5.61091e-45
SORL1	8063.84	1.77084	0.0652875	27.1237	5.18042e-162	1.66795e-159
TSC22D2	1352.44	1.76844	0.0870051	20.3257	7.61307e-92	9.94484e-90
CSRP2	196.126	1.76783	0.167357	10.5632	4.41467e-26	8.67005e-25
GRIN2D	90.1397	1.76679	0.253059	6.98173	2.9156e-12	2.48789e-11
STON2	394.748	1.76177	0.126516	13.9252	4.45016e-44	1.91583e-42
CLIC5	2237.75	1.76176	0.0750711	23.4679	8.6835e-122	1.68224e-119
ANKZF1	2317.84	1.75911	0.0715437	24.5879	1.70392e-133	3.9345e-131
PHKG1	20.1246	1.75451	0.489468	3.58452	0.000337693	0.00118654
NFKB2	530.969	1.75375	0.12379	14.1671	1.4639e-45	6.60056e-44
UGT1A6	40.3514	1.74565	0.353583	4.93701	7.93283e-07	4.05693e-06
RHOB	539.992	1.7456	0.107227	16.2795	1.38053e-59	9.4206e-58
PER1	250.94	1.74396	0.1462	11.9286	8.39628e-33	2.34072e-31
ARFGEF3	425.171	1.74221	0.127077	13.7099	8.86302e-43	3.6572e-41
TNIP1	3059.94	1.7381	0.081626	21.2934	1.30662e-100	1.96509e-98
ZSWIM6	744.818	1.73414	0.105427	16.4488	8.55984e-61	6.05814e-59
AKAP7	2641.57	1.734	0.0697168	24.8721	1.49302e-136	3.7506e-134
NOCT	232.58	1.73272	0.152433	11.3671	6.09812e-30	1.42685e-28
BCL10	467.229	1.73255	0.12945	13.3839	7.51189e-41	2.85727e-39
IL10RB	23.3541	1.73049	0.492717	3.51213	0.000444522	0.0015274
PPME1	2226.12	1.72955	0.0710391	24.3464	6.3299e-131	1.39493e-128
APLP1	35.8122	1.72181	0.370705	4.64469	3.40581e-06	1.60563e-05
ICAM5	46.102	1.71936	0.347762	4.94407	7.65082e-07	3.91884e-06
LRP2BP	48.6934	1.71449	0.323936	5.29269	1.20528e-07	6.77803e-07
SLC35E4	48.5081	1.71315	0.344379	4.97459	6.53852e-07	3.36645e-06
PIM1	1535.59	1.71012	0.0844842	20.2419	4.18334e-91	5.34252e-89
IL2RG	460.451	1.70901	0.118674	14.4009	5.10823e-47	2.44809e-45
TNFRSF10D	848.274	1.70787	0.0958678	17.8148	5.4215e-71	4.8037e-69
MAP3K8	441.183	1.70301	0.129833	13.1169	2.63419e-39	9.65025e-38
FXYD3	309.896	1.70116	0.145522	11.69	1.43311e-31	3.63606e-30
PDLIM3	14.1367	1.70036	0.592764	2.86853	0.0041238	0.0117529
DYRK1B	93.2462	1.69302	0.241221	7.01855	2.2419e-12	1.9325e-11
UBE2O	1330.28	1.69142	0.0867538	19.4968	1.16868e-84	1.35614e-82
C1orf61	100.724	1.69129	0.224936	7.51896	5.52139e-14	5.3547e-13
SLC25A51	160.481	1.69074	0.197253	8.57146	1.02179e-17	1.25987e-16
MPZL2	6169.27	1.68887	0.0627669	26.907	1.82035e-159	5.62341e-157
GJB3	15.7012	1.68766	0.59286	2.84665	0.0044182	0.0124954
FTH1	1343.29	1.687	0.278018	6.06796	1.29548e-09	8.91473e-09
CYP2S1	1724.86	1.68648	0.0763213	22.0972	3.36543e-108	5.78449e-106
HK1	374.39	1.68389	0.135329	12.443	1.52663e-35	4.82026e-34
LURAP1L	13.9632	1.67827	0.57844	2.90136	0.00371544	0.0107065
TIMD4	61.6096	1.67451	0.289125	5.79165	6.97e-09	4.48829e-08
PITPNC1	22.9128	1.66911	0.484628	3.44411	0.000572944	0.00193407
ARRDC3	1026.46	1.66171	0.0895245	18.5615	6.5831e-77	6.54303e-75
DNAJB9	733.973	1.66	0.113219	14.6619	1.131e-48	5.64513e-47
KCMF1	1734.42	1.65933	0.0856573	19.3718	1.33626e-83	1.50478e-81
LEAP2	84.1066	1.65679	0.254991	6.49743	8.17054e-11	6.2301e-10
LRP4	1074.93	1.65506	0.092277	17.9358	6.19308e-72	5.5958e-70
ULBP2	136.431	1.65501	0.192876	8.58067	9.43242e-18	1.16554e-16
ZNF823	464.068	1.65293	0.1232	13.4166	4.83542e-41	1.85466e-39
SNED1	26.3893	1.64946	0.434428	3.79685	0.000146549	0.00054482
PLK2	257.358	1.64811	0.149208	11.0457	2.29882e-28	5.024e-27
CRABP2	72.3885	1.64641	0.288595	5.70491	1.16404e-08	7.3245e-08
CRKL	3339.16	1.64097	0.0665314	24.6646	2.5637e-134	6.1048e-132
TMSB10	7097.52	1.64039	0.0932294	17.5952	2.6817e-69	2.2705e-67
SLC7A11	535.521	1.63103	0.13173	12.3815	3.28943e-35	1.02727e-33
TPI1	15474	1.63008	0.0658092	24.7697	1.90056e-135	4.57336e-133
HES4	145.603	1.62782	0.233507	6.97115	3.14357e-12	2.67543e-11
TACSTD2	394.088	1.62626	0.13381	12.1535	5.49423e-34	1.62271e-32
NAMPT	2637.1	1.62619	0.0943079	17.2434	1.25519e-66	1.00328e-64
NPC1	1559.68	1.62519	0.0808033	20.113	5.68195e-90	7.09778e-88
INHA	50.5696	1.62511	0.336536	4.82893	1.37271e-06	6.82772e-06
RAB3A	50.5078	1.62252	0.306531	5.29318	1.20205e-07	6.76152e-07
RHEBL1	25.2334	1.62174	0.434028	3.73649	0.000186609	0.000683305
OXT	19.4189	1.61867	0.503715	3.21347	0.00131141	0.00415853
CLIC3	23.7643	1.61739	0.471284	3.43187	0.000599425	0.00201542
OPTN	3606.11	1.61573	0.061608	26.226	1.34316e-151	3.65531e-149
EIF1	7107.99	1.61497	0.0651662	24.7823	1.39159e-135	3.38424e-133
DUSP4	60.6165	1.61401	0.298816	5.40135	6.61429e-08	3.83763e-07
FAM160A1	1052.04	1.61303	0.102131	15.7937	3.43711e-56	2.1705e-54
ENTPD2	86.503	1.61227	0.241179	6.68496	2.30985e-11	1.83217e-10
AURKC	18.7082	1.612	0.531293	3.0341	0.00241255	0.00723956
NR1D1	200.568	1.60769	0.168119	9.56283	1.14585e-21	1.77467e-20
UGDH	4424.44	1.60693	0.0646737	24.8467	2.8056e-136	6.9713e-134
ADRM1	1600.55	1.60687	0.104197	15.4215	1.1729e-53	6.87499e-52
DEDD2	808.832	1.60544	0.109848	14.6151	2.2493e-48	1.11538e-46
TIPARP	670.175	1.601	0.115299	13.8857	7.73421e-44	3.29858e-42
BAG3	1062.67	1.59819	0.08598	18.588	4.02155e-77	4.06782e-75
KCNK6	469.392	1.59704	0.116354	13.7256	7.1318e-43	2.95886e-41
IDS	69.1799	1.59684	0.266927	5.98232	2.19978e-09	1.48208e-08
LRP11	74.1278	1.59578	0.262582	6.07725	1.22259e-09	8.43091e-09
MID2	34.7581	1.58442	0.426456	3.71533	0.000202937	0.000740012
P4HA3	15.4651	1.5814	0.581415	2.71991	0.00652998	0.0177203
VDAC2	1563.48	1.58068	0.104841	15.0769	2.29912e-51	1.2819e-49
ZNF562	861.507	1.57842	0.0985281	16.02	9.26007e-58	6.01378e-56
IMPAD1	1777.39	1.57075	0.0844171	18.607	2.82079e-77	2.87872e-75
LGALS8	1620.11	1.56913	0.0889501	17.6406	1.20125e-69	1.02848e-67
SLC15A1	650.673	1.5637	0.105192	14.8652	5.54144e-50	2.92557e-48
RIT1	1163.4	1.56303	0.0949364	16.464	6.65621e-61	4.7255e-59
MED15	1511.44	1.56225	0.0845083	18.4863	2.66181e-76	2.58932e-74
FAM162A	2723.62	1.56063	0.0674099	23.1514	1.40872e-118	2.66144e-116
ST8SIA6	15.1165	1.55971	0.564271	2.76411	0.00570779	0.0157262
ERRFI1	708.921	1.55749	0.108535	14.3501	1.06387e-46	5.00667e-45
PRSS53	42.0795	1.55606	0.344017	4.52321	6.09089e-06	2.77035e-05
DAPK2	64.4431	1.55039	0.277539	5.58621	2.32084e-08	1.41366e-07
EGR1	236.464	1.55022	0.152502	10.1652	2.83501e-24	5.1517e-23
GAN	279.539	1.54969	0.158147	9.79899	1.13718e-22	1.88104e-21
ARL8A	271.172	1.5478	0.165437	9.35582	8.29552e-21	1.22583e-19
SERPINB8	28.9029	1.54751	0.422089	3.66631	0.000246077	0.000884892
SERPINB6	1624.86	1.54711	0.0773662	19.9972	5.82773e-89	7.20118e-87
PSMD14	1842.3	1.54398	0.0849144	18.1828	7.05909e-74	6.53324e-72
KDM5B	4012.48	1.53857	0.0638424	24.0996	2.52431e-128	5.34313e-126
TNFRSF10B	3082.91	1.53792	0.0688218	22.3464	1.30807e-110	2.30019e-108
RPP21	33.4043	1.53767	0.395066	3.89217	9.93507e-05	0.000380174
PIK3IP1	147.469	1.53709	0.192515	7.98427	1.41352e-15	1.52205e-14
FSTL3	1198.88	1.53671	0.0940121	16.3458	4.65652e-60	3.21595e-58
RORA	549.963	1.53633	0.129535	11.8604	1.90122e-32	5.18638e-31
KCTD11	146.715	1.53351	0.19181	7.99491	1.29671e-15	1.40022e-14
ABHD4	1876.48	1.53291	0.0724313	21.1637	2.06452e-99	3.06461e-97
AREG	662.42	1.53088	0.101862	15.029	4.74439e-51	2.61973e-49
NXPE3	236.483	1.52948	0.153068	9.99214	1.64973e-23	2.85486e-22
LIN54	845.707	1.52661	0.092913	16.4305	1.15716e-60	8.16443e-59
WDR45B	2279.82	1.52658	0.0749677	20.3632	3.54703e-92	4.687e-90
PSMD13	3531.22	1.52596	0.0647	23.5852	5.47142e-123	1.08762e-120
ISG20	82.0263	1.52557	0.251366	6.06912	1.28613e-09	8.8557e-09
KDM4B	901.217	1.52536	0.0936133	16.2942	1.08445e-59	7.42229e-58
TJP2	106.091	1.52448	0.224656	6.78584	1.15416e-11	9.37268e-11
AKR1B10	12.2442	1.52391	0.611904	2.49043	0.0127587	0.0321748
DENND2C	41.7021	1.52111	0.366489	4.1505	3.31745e-05	0.000136692
DNTTIP2	968.637	1.521	0.10839	14.0327	9.8293e-45	4.33779e-43
IER5L	38.0074	1.51935	0.378187	4.01746	5.88287e-05	0.00023283
MYADM	831.452	1.51929	0.10639	14.2804	2.90121e-46	1.348e-44
SLC11A2	5898.42	1.51889	0.0733177	20.7166	2.45602e-95	3.40271e-93
KCNAB1	22.2488	1.51817	0.498413	3.04601	0.00231896	0.00698899
PCK1	90.5019	1.51816	0.232197	6.53824	6.22478e-11	4.78153e-10
ABCC2	11651.4	1.51313	0.0565752	26.7455	1.39355e-157	4.19164e-155
DCUN1D3	418.666	1.51312	0.128152	11.8072	3.58178e-32	9.58777e-31
ZNF595	233.213	1.51244	0.174477	8.66843	4.38133e-18	5.55195e-17
FSBP	57.5085	1.51129	0.317666	4.75747	1.96039e-06	9.53094e-06
IL10RA	13.2589	1.51085	0.603065	2.50528	0.0122354	0.0310021
SPAG9	6569.66	1.50647	0.0694214	21.7004	2.03304e-104	3.18324e-102
DNAJB4	175.048	1.50206	0.184304	8.14989	3.64251e-16	4.07177e-15
HYPK	49.7444	1.49992	0.314481	4.76952	1.84668e-06	9.01646e-06
GOLGA8A	713.724	1.49836	0.0964761	15.5309	2.14418e-54	1.29672e-52
PCSK1N	117.893	1.49581	0.228079	6.55829	5.44281e-11	4.19638e-10
SLC36A1	4121.34	1.49544	0.0688195	21.7299	1.06955e-104	1.69792e-102
RELB	96.8699	1.49407	0.241977	6.17441	6.64102e-10	4.67407e-09
VLDLR	222.665	1.49173	0.158365	9.41952	4.53151e-21	6.78835e-20
GUK1	984.068	1.48989	0.0891754	16.7074	1.15697e-62	8.5043e-61
PGAM1	641.998	1.48959	0.108837	13.6864	1.22385e-42	5.00486e-41
IGFBP6	215.444	1.48922	0.167227	8.90538	5.32033e-19	7.13749e-18
CDT1	682.354	1.4877	0.112376	13.2386	5.25501e-40	1.97907e-38
ZNF470	22.0451	1.48603	0.4666	3.1848	0.00144855	0.00455798
PLCXD2	411.71	1.48571	0.140482	10.5758	3.85924e-26	7.59881e-25
CLK3	1398.93	1.4845	0.0779096	19.0541	6.06944e-81	6.63863e-79
TMSB4X	1202.26	1.48354	0.0872455	17.0043	7.63607e-65	5.85774e-63
SNAI1	164.979	1.48171	0.180717	8.19906	2.42271e-16	2.74718e-15
NFIL3	753.2	1.47543	0.105901	13.9322	4.03825e-44	1.74507e-42
TMEM45A	71.4942	1.4749	0.267192	5.51999	3.39028e-08	2.02566e-07
SELENOK	874.573	1.47088	0.1025	14.3501	1.06441e-46	5.00667e-45
CREB5	44.4486	1.46523	0.344655	4.2513	2.12529e-05	9.03388e-05
INSIG1	5210.74	1.46174	0.0868724	16.8263	1.56573e-63	1.17353e-61
UBE2V1	203.277	1.45974	0.172711	8.45191	2.86582e-17	3.43358e-16
ERFL	26.6471	1.45621	0.446445	3.26179	0.00110712	0.00355711
FAT2	76.5074	1.4556	0.263188	5.53063	3.19084e-08	1.913e-07
PRELID2	492.325	1.45415	0.118152	12.3075	8.25712e-35	2.51677e-33
EGFL8	59.59	1.45335	0.284121	5.11524	3.13344e-07	1.68463e-06
PSMD11	3917.85	1.45141	0.0613258	23.6672	7.8505e-124	1.58816e-121
WDR66	27.6807	1.45098	0.408707	3.55017	0.000384988	0.00133955
TNFRSF10A	297.559	1.45083	0.138161	10.501	8.54924e-26	1.64925e-24
APOL1	50.6506	1.45	0.318669	4.55019	5.35976e-06	2.45392e-05
TRIM47	21.5878	1.44972	0.471638	3.0738	0.0021135	0.00642663
ZNF581	948.735	1.4475	0.110095	13.1477	1.75353e-39	6.44466e-38
FLNA	7423.9	1.44638	0.0712088	20.3118	1.01117e-91	1.31337e-89
IFRD1	1076.12	1.4452	0.0879877	16.425	1.26729e-60	8.8866e-59
AIF1	44.3846	1.44303	0.346073	4.16973	3.04967e-05	0.000126548
VCP	8344.53	1.44069	0.0580243	24.8291	4.3518e-136	1.0697e-133
NEURL3	114.61	1.44027	0.209008	6.89097	5.54133e-12	4.63162e-11
SLC4A3	31.2463	1.43935	0.391582	3.67573	0.000237175	0.000855041
TSPYL2	708.586	1.43851	0.0956439	15.0402	4.00137e-51	2.2148e-49
IL1B	12.9392	1.43656	0.593912	2.41881	0.0155713	0.038395
PRPF3	1411.54	1.43654	0.0771879	18.6109	2.6228e-77	2.68866e-75
MED31	72.0703	1.43268	0.259218	5.52692	3.25898e-08	1.9518e-07
ZG16	365.178	1.43107	0.146715	9.75411	1.77154e-22	2.91139e-21
CDKN2D	53.1807	1.43093	0.305817	4.67903	2.8823e-06	1.37098e-05
CCNK	356.631	1.43057	0.123441	11.5891	4.67873e-31	1.15878e-29
BMP2	1004.99	1.42929	0.0848562	16.8437	1.16761e-63	8.83826e-62
BAAT	24.0119	1.42741	0.477961	2.98646	0.0028223	0.00834424
TRIB3	2736.7	1.42736	0.0833884	17.117	1.108e-65	8.61527e-64
FBXL16	123.245	1.42699	0.208289	6.85097	7.33502e-12	6.05775e-11
SLC30A1	2516.85	1.42568	0.0924008	15.4293	1.03942e-53	6.13983e-52
KLC1	457.47	1.42479	0.112989	12.6099	1.86184e-36	6.16484e-35
LY6G6C	25.4882	1.42407	0.428896	3.32031	0.000899172	0.00293351
PAG1	3565.23	1.42362	0.0785421	18.1256	2.00122e-73	1.84467e-71
TMEM81	51.6714	1.42026	0.34279	4.14323	3.42447e-05	0.000140722
KCNA7	20.027	1.41947	0.485257	2.92518	0.00344256	0.00998945
PPP1R18	95.1414	1.41828	0.234003	6.06095	1.35322e-09	9.30361e-09
SHH	70.2062	1.41733	0.278359	5.09174	3.54798e-07	1.89635e-06
AP001931.2	19.5362	1.41678	0.504097	2.81053	0.00494599	0.0138242
ZRSR2	192.349	1.41479	0.16832	8.40537	4.26502e-17	5.03868e-16
OAS1	373.233	1.41429	0.133161	10.621	2.38113e-26	4.73738e-25
SYBU	402.758	1.41049	0.120216	11.7329	8.6414e-32	2.23464e-30
RBM33	3054.62	1.40992	0.0718421	19.6253	9.39797e-86	1.11315e-83
DDX41	2112.04	1.4091	0.0857739	16.4281	1.20337e-60	8.46431e-59
RNMT	2515.99	1.40576	0.0726321	19.3545	1.86848e-83	2.0938e-81
SEMA4B	445.099	1.40554	0.131608	10.6798	1.26604e-26	2.56574e-25
CYP4F2	14.4249	1.40533	0.579413	2.42544	0.0152898	0.0377782
AC068831.8	113.783	1.40505	0.239398	5.86911	4.38149e-09	2.87488e-08
PIM2	185.408	1.40502	0.168352	8.34573	7.07742e-17	8.27146e-16
PHF1	894.266	1.40459	0.0953601	14.7294	4.17516e-49	2.13521e-47
RNF19B	532.631	1.40257	0.111948	12.5287	5.19941e-36	1.67171e-34
GCOM1	85.658	1.40226	0.245387	5.71449	1.1003e-08	6.94066e-08
GSR	2514.23	1.40176	0.067164	20.8707	9.89666e-97	1.39653e-94
ANKRD61	44.6027	1.40159	0.336021	4.17113	3.0309e-05	0.000125883
VEGFA	5208.27	1.39875	0.0641356	21.8093	1.89348e-105	3.06986e-103
MAP1LC3B	2069.53	1.39675	0.0865691	16.1345	1.46095e-58	9.85173e-57
NRIP3	307.549	1.3928	0.145963	9.54214	1.39913e-21	2.15672e-20
MAP3K14	133.986	1.39265	0.208368	6.6836	2.33148e-11	1.84868e-10
DKK4	24.8867	1.39165	0.429475	3.24035	0.00119384	0.00381642
ARID3B	663.546	1.39124	0.113221	12.2878	1.05339e-34	3.19369e-33
HOXA13	131.527	1.39059	0.195182	7.12454	1.04428e-12	9.20643e-12
GALNT3	2335.81	1.39019	0.0781892	17.7799	1.01212e-70	8.89885e-69
EIF4E3	56.9683	1.38536	0.305436	4.53569	5.74162e-06	2.62035e-05
BACH1	2245.47	1.38266	0.0886963	15.5887	8.6876e-55	5.33867e-53
AGTPBP1	220.645	1.38214	0.170043	8.12821	4.35686e-16	4.8608e-15
GOLGB1	4943.97	1.38207	0.205855	6.71376	1.89666e-11	1.51124e-10
HBP1	1589.32	1.37585	0.0878374	15.6636	2.68222e-55	1.66618e-53
OSBPL2	4135.17	1.37495	0.0629262	21.8503	7.72709e-106	1.26172e-103
SLCO4A1	532.835	1.37447	0.130521	10.5306	6.24453e-26	1.21283e-24
POFUT2	981.772	1.37373	0.088491	15.524	2.38742e-54	1.43245e-52
RNF4	1538.09	1.37341	0.0769486	17.8484	2.97551e-71	2.6467e-69
U2AF1	57.6648	1.372	0.286319	4.79185	1.65249e-06	8.13607e-06
FAM210A	597.961	1.37187	0.120106	11.4221	3.24146e-30	7.69022e-29
DDX47	107.818	1.37034	0.220618	6.21138	5.25226e-10	3.73574e-09
C11orf86	55.9376	1.36967	0.294621	4.64891	3.33688e-06	1.57476e-05
PSMB2	2292.16	1.36734	0.0698566	19.5736	2.597e-85	3.04448e-83
HDHD2	13.5136	1.36651	0.590066	2.31586	0.0205657	0.0490119
USP14	4025	1.36488	0.0848906	16.0782	3.63011e-58	2.40535e-56
JUND	878.773	1.36275	0.13304	10.2431	1.27088e-24	2.34482e-23
PSMC1	487.044	1.36166	0.112015	12.1561	5.3236e-34	1.57435e-32
KRT18	11747.1	1.36018	0.0717434	18.9589	3.72513e-80	4.01682e-78
LBH	1157.17	1.35977	0.085947	15.821	2.22913e-56	1.4155e-54
BLCAP	4700.1	1.35797	0.0652694	20.8056	3.85158e-96	5.40166e-94
CDR2	1036.21	1.35686	0.0996586	13.6151	3.25813e-42	1.3136e-40
PRR5	536.795	1.35681	0.107941	12.57	3.08859e-36	1.00577e-34
PGM1	1279.67	1.35655	0.0827969	16.3841	2.48391e-60	1.73116e-58
TXNL1	1016.02	1.35439	0.106088	12.7667	2.51661e-37	8.66411e-36
TRABD2A	34.6121	1.35319	0.383014	3.533	0.000410872	0.00142268
MYH11	18.1684	1.34878	0.512389	2.63234	0.00847994	0.0224028
YOD1	498.548	1.34817	0.147667	9.12979	6.86338e-20	9.71498e-19
STBD1	51.0855	1.34791	0.319111	4.22394	2.4007e-05	0.000101087
PLEKHM3	1061.85	1.34752	0.0856793	15.7275	9.8042e-56	6.14039e-54
PIGH	436.574	1.34626	0.119863	11.2316	2.85256e-29	6.49496e-28
HSP90AB1	35731.4	1.34504	0.0621499	21.6419	7.24692e-104	1.12697e-101
SDCBP	1130.73	1.3447	0.097957	13.7275	6.95292e-43	2.88989e-41
BTN3A1	719.539	1.34188	0.116814	11.4873	1.52751e-30	3.68731e-29
SENP5	1086.19	1.34085	0.0895792	14.9684	1.18206e-50	6.38817e-49
PLAA	303.228	1.33913	0.133281	10.0474	9.42779e-24	1.65657e-22
E2F6	501.954	1.33909	0.112103	11.9452	6.87957e-33	1.92966e-31
SPRY4	422.557	1.33819	0.119818	11.1686	5.81072e-29	1.30613e-27
CCDC186	1292.89	1.33756	0.125948	10.62	2.40649e-26	4.78368e-25
THAP3	228.643	1.33745	0.166926	8.01225	1.12633e-15	1.22202e-14
OVGP1	66.3066	1.33648	0.281518	4.74742	2.06028e-06	9.98471e-06
RHOG	522.202	1.3363	0.11539	11.5807	5.16151e-31	1.27421e-29
SEC61G	774.549	1.33624	0.113606	11.762	6.1232e-32	1.60708e-30
ZNF121	741.98	1.33596	0.111873	11.9418	7.16524e-33	2.00732e-31
S100P	267.023	1.33518	0.138468	9.6425	5.28824e-22	8.38344e-21
WNT11	191.641	1.33502	0.178934	7.46096	8.58946e-14	8.19854e-13
BLMH	955.903	1.33486	0.0937914	14.2322	5.78171e-46	2.6755e-44
SUCO	1961.9	1.33265	0.0953061	13.9829	1.98366e-44	8.6539e-43
SEC24A	3683.8	1.33043	0.0914048	14.5554	5.39961e-48	2.66024e-46
FBL	3187.73	1.32555	0.0832589	15.9208	4.54866e-57	2.92085e-55
UBQLN1	1812.23	1.32512	0.0861185	15.3872	1.9952e-53	1.16353e-51
ACTG1	23588.9	1.32477	0.0630641	21.0067	5.69223e-98	8.23572e-96
KBTBD8	20.4743	1.32217	0.468198	2.82395	0.00474353	0.0133248
ETV5	80.0003	1.32199	0.253684	5.21119	1.8763e-07	1.03679e-06
RTCA	729.22	1.32195	0.0981634	13.4668	2.4517e-41	9.55991e-40
CTDP1	265.118	1.3206	0.14783	8.93318	4.13932e-19	5.57929e-18
CYTH1	1347.3	1.3205	0.0761016	17.3518	1.91036e-67	1.55967e-65
NDUFV2	50.1264	1.31907	0.3283	4.01789	5.87213e-05	0.000232445
GPR137B	110.361	1.31853	0.232217	5.67802	1.3626e-08	8.50834e-08
HSPA8	50820.7	1.31652	0.0580994	22.6598	1.11796e-113	2.0283e-111
DNAJB1	2563.41	1.31621	0.0652069	20.1852	1.32179e-90	1.66022e-88
TBX19	120.682	1.31604	0.199705	6.58995	4.39984e-11	3.42459e-10
HELZ	2779.09	1.31427	0.0835474	15.7308	9.30088e-56	5.84116e-54
ZC3H12A	170.095	1.31401	0.179167	7.33398	2.23421e-13	2.07029e-12
RPL41	1802.68	1.31302	0.11741	11.1831	4.93127e-29	1.11282e-27
YEATS2	1812.39	1.31222	0.0709115	18.5051	1.87848e-76	1.83513e-74
FGD6	1466.33	1.31171	0.0838577	15.6421	3.7596e-55	2.32912e-53
HLA-B	571.31	1.3117	0.120843	10.8545	1.89797e-27	3.96233e-26
PHTF1	293.551	1.31027	0.13497	9.70786	2.79124e-22	4.52217e-21
BSDC1	1434.38	1.30952	0.0787969	16.6189	5.08602e-62	3.69099e-60
MORC3	966.949	1.30829	0.117091	11.1733	5.5112e-29	1.24002e-27
RNF19A	976.401	1.3062	0.0969948	13.4667	2.4548e-41	9.55991e-40
PSMD3	3398.86	1.30529	0.0751583	17.3672	1.46062e-67	1.20107e-65
SRPX	138.573	1.30278	0.188262	6.92004	4.51513e-12	3.79889e-11
VEZT	2168.08	1.30217	0.0811839	16.0397	6.74832e-58	4.42025e-56
EFNB1	447.454	1.30207	0.12907	10.0881	6.23462e-24	1.10398e-22
LARP4B	4245.86	1.3006	0.064166	20.2693	2.4027e-91	3.08571e-89
TMF1	1273.55	1.29815	0.106123	12.2325	2.0844e-34	6.25321e-33
PLEKHA8	940.641	1.29633	0.106497	12.1725	4.35763e-34	1.29539e-32
TRAF5	199.858	1.29621	0.159044	8.15004	3.63802e-16	4.06874e-15
ZDHHC9	3339.73	1.29294	0.0630387	20.5103	1.74245e-93	2.32938e-91
TOMM5	46.6162	1.29267	0.325637	3.96968	7.19696e-05	0.000280995
YPEL2	701.124	1.29219	0.113536	11.3813	5.18433e-30	1.21677e-28
TNFRSF21	1042.14	1.29074	0.0865172	14.9189	2.48504e-50	1.3242e-48
TLCD3A	283.349	1.29031	0.141313	9.1309	6.79323e-20	9.62164e-19
RASSF2	42.7814	1.28886	0.343456	3.75264	0.000174985	0.00064332
TAF13	151.713	1.28818	0.185929	6.92831	4.25884e-12	3.59119e-11
SCTR	49.4968	1.28749	0.3075	4.18697	2.82708e-05	0.000117932
TBC1D15	1170.97	1.28676	0.109123	11.7919	4.29821e-32	1.1412e-30
SEC24D	1170.16	1.28565	0.0941197	13.6597	1.76597e-42	7.18329e-41
CAV1	85.5597	1.28513	0.240844	5.33594	9.50514e-08	5.40516e-07
PDE10A	84.5205	1.28512	0.26866	4.78346	1.72304e-06	8.45434e-06
KIF1A	148.096	1.28503	0.183819	6.99075	2.73425e-12	2.34101e-11
CHMP4B	6029.93	1.2849	0.0690636	18.6046	2.95044e-77	2.99765e-75
DMRTA2	32.4397	1.28283	0.386343	3.32045	0.000898738	0.00293251
SLA	36.1946	1.28176	0.372471	3.44123	0.000579077	0.00195333
TUBB1	20.1252	1.28083	0.504076	2.54095	0.0110552	0.0283638
RAB11FIP5	1048.84	1.27949	0.0861761	14.8474	7.23111e-50	3.80007e-48
FEM1C	689.08	1.27917	0.120093	10.6516	1.71478e-26	3.4507e-25
ZBTB25	453.825	1.27739	0.123258	10.3636	3.6319e-25	6.86727e-24
RUBCNL	90.6892	1.27524	0.248579	5.13015	2.89515e-07	1.56203e-06
ABTB2	184.467	1.27496	0.166505	7.65717	1.90077e-14	1.89828e-13
A4GALT	71.3753	1.27266	0.299368	4.25116	2.12667e-05	9.03805e-05
CDKN1A	673.404	1.27244	0.104915	12.1283	7.47579e-34	2.18259e-32
CA14	29.3571	1.2723	0.393487	3.2334	0.00122326	0.0039061
DUSP8	105.828	1.27054	0.245017	5.18553	2.15406e-07	1.18029e-06
TRAPPC2B	54.7177	1.27051	0.295131	4.3049	1.67064e-05	7.19765e-05
EREG	269.257	1.26996	0.149344	8.50356	1.83857e-17	2.22379e-16
PSMD12	1408.36	1.26973	0.10859	11.6928	1.3868e-31	3.52638e-30
IL32	760.475	1.26967	0.100374	12.6494	1.12755e-36	3.77389e-35
PSMD2	4285.46	1.26886	0.062723	20.2295	5.37936e-91	6.83178e-89
MAPRE2	397.297	1.26752	0.139621	9.0783	1.10284e-19	1.5429e-18
AKR1C1	5046.42	1.26584	0.0741141	17.0796	2.10569e-65	1.62074e-63
KDM7A	431.783	1.26525	0.12034	10.514	7.44769e-26	1.44161e-24
TICRR	489.711	1.26469	0.111279	11.3651	6.24153e-30	1.45891e-28
RCOR1	1198.87	1.26371	0.0788307	16.0307	7.80477e-58	5.08515e-56
ANGPTL4	22.0495	1.26325	0.460195	2.74503	0.00605062	0.016559
PREP	1618.81	1.26323	0.0760341	16.614	5.52297e-62	3.98281e-60
MSANTD3	283.484	1.26272	0.141634	8.91542	4.85974e-19	6.53108e-18
WASF2	2933.05	1.26194	0.0631825	19.9729	9.46935e-89	1.16381e-86
FBXO30	597.867	1.26194	0.139972	9.01564	1.95724e-19	2.69695e-18
RGS10	168.673	1.26016	0.189195	6.66066	2.72602e-11	2.15108e-10
LRRC1	1139.45	1.25836	0.0856711	14.6883	7.66158e-49	3.8663e-47
SMAP1	299.126	1.25649	0.132347	9.49391	2.22522e-21	3.38447e-20
MED10	522.61	1.2547	0.108671	11.5458	7.74959e-31	1.9049e-29
SAMD8	675.326	1.25401	0.116795	10.7368	6.83451e-27	1.39373e-25
RND1	65.9468	1.25362	0.271023	4.62552	3.73661e-06	1.74931e-05
TUBB2B	153.137	1.25228	0.192941	6.49045	8.55798e-11	6.51033e-10
TGIF1	859.539	1.25215	0.0982085	12.7499	3.12184e-37	1.06515e-35
YPEL1	33.1511	1.25202	0.371714	3.36822	0.000756556	0.00250179
DHPS	99.6595	1.25199	0.220366	5.6814	1.33596e-08	8.35111e-08
GPCPD1	355.933	1.25124	0.125523	9.96824	2.09906e-23	3.61601e-22
NR4A2	31.7068	1.25087	0.398118	3.14196	0.0016782	0.00520538
BCL3	283.938	1.24882	0.153174	8.15292	3.55235e-16	3.97487e-15
CSRNP1	370.454	1.24599	0.128373	9.70601	2.84251e-22	4.60196e-21
AZI2	435.701	1.24594	0.117131	10.6372	2.00037e-26	4.00074e-25
CCND1	2311.06	1.24574	0.0727356	17.127	9.3324e-66	7.28118e-64
MYC	1107.1	1.24479	0.0971317	12.8155	1.34261e-37	4.65032e-36
MICB	60.4793	1.24324	0.273692	4.54248	5.55955e-06	2.54081e-05
ATG4A	232.508	1.24288	0.154426	8.04837	8.39012e-16	9.18133e-15
ETV3	741.657	1.24022	0.0965421	12.8464	9.0144e-38	3.1413e-36
NPLOC4	3426.1	1.23954	0.0639548	19.3816	1.10465e-83	1.25011e-81
KRT19	11442.4	1.23847	0.0830014	14.921	2.40482e-50	1.28444e-48
RELA	1357.4	1.23648	0.0820677	15.0666	2.68692e-51	1.49085e-49
AGPAT2	1461.22	1.23571	0.0984878	12.5468	4.13945e-36	1.33655e-34
FBXO32	19.2647	1.23565	0.519415	2.37894	0.0173627	0.0422876
TAF9B	452.261	1.23546	0.12687	9.73795	2.07711e-22	3.40134e-21
NCBP2	2552.89	1.23517	0.0659114	18.7399	2.34176e-78	2.46694e-76
FNDC3B	1299.32	1.23507	0.0900542	13.7147	8.28765e-43	3.42596e-41
SF3A2	920.346	1.23394	0.104222	11.8395	2.43824e-32	6.59625e-31
HSP90AA1	19623.1	1.23094	0.0675747	18.2159	3.85668e-74	3.61327e-72
ZNF222	130.877	1.23027	0.206195	5.96655	2.4233e-09	1.62692e-08
EIF2A	3834.15	1.22888	0.0834588	14.7244	4.49759e-49	2.29498e-47
IGHMBP2	885.795	1.22877	0.0927987	13.2413	5.06884e-40	1.91211e-38
EDN1	140.136	1.22588	0.186826	6.5616	5.32338e-11	4.10707e-10
EPHB3	55.2904	1.22461	0.287695	4.25664	2.07525e-05	8.83103e-05
RNF145	616.671	1.22451	0.101042	12.1189	8.39043e-34	2.43717e-32
ZNF256	27.7748	1.2235	0.433787	2.8205	0.00479485	0.0134557
SOD1	3356.77	1.22319	0.0693669	17.6337	1.35807e-69	1.15411e-67
HSPH1	3699.05	1.22239	0.105482	11.5886	4.71022e-31	1.16532e-29
H1-2	477.927	1.22165	0.13456	9.07888	1.09694e-19	1.53559e-18
SAV1	468.505	1.22153	0.110758	11.0287	2.77757e-28	6.04716e-27
C4orf3	2112.97	1.22091	0.0788257	15.4888	4.13099e-54	2.46565e-52
NFKBID	50.535	1.21871	0.302483	4.02902	5.60093e-05	0.000222519
DAP3	3864.5	1.21855	0.0655782	18.5816	4.52867e-77	4.56059e-75
TUFT1	1190.23	1.21797	0.0865379	14.0745	5.45265e-45	2.42978e-43
TAX1BP1	4531.75	1.21718	0.0802774	15.1622	6.2963e-52	3.52778e-50
RASGRP1	47.8723	1.21645	0.312119	3.89741	9.72275e-05	0.00037261
FBXO16	42.4227	1.21592	0.343806	3.53666	0.000405222	0.00140582
ZNF296	55.1556	1.21438	0.307027	3.95529	7.64418e-05	0.000297288
UGP2	3917.28	1.21349	0.0779567	15.5663	1.23424e-54	7.54405e-53
ABCB6	283.873	1.21343	0.151072	8.03218	9.57582e-16	1.04538e-14
CWC22	966.697	1.21274	0.0960857	12.6215	1.60778e-36	5.34989e-35
EMP3	20.9023	1.21272	0.490028	2.4748	0.013331	0.0334557
AXL	70.1174	1.21197	0.271054	4.47134	7.77319e-06	3.49312e-05
GPR157	950.871	1.21153	0.0941778	12.8642	7.15427e-38	2.4969e-36
LMLN	61.6719	1.2111	0.270344	4.47986	7.46922e-06	3.3627e-05
LGALS9	27.1236	1.21067	0.421869	2.86977	0.00410772	0.0117144
TET1	1328.88	1.20985	0.0915842	13.2102	7.65935e-40	2.83781e-38
CWC25	611.635	1.2094	0.105105	11.5067	1.22118e-30	2.96665e-29
WHAMM	449.29	1.20901	0.122293	9.88616	4.7803e-23	8.04696e-22
GEM	145.817	1.20858	0.185389	6.51916	7.0702e-11	5.41456e-10
POLR3D	930.49	1.20609	0.0943507	12.783	2.03933e-37	7.03155e-36
N4BP3	102.665	1.20394	0.232858	5.17027	2.33761e-07	1.27506e-06
RASSF7	1027.68	1.2033	0.1098	10.959	6.01414e-28	1.29335e-26
FAM114A1	706.03	1.2032	0.0977212	12.3126	7.74915e-35	2.37461e-33
KCTD9	739.431	1.20175	0.106249	11.3107	1.16107e-29	2.68373e-28
CEP170B	904.585	1.19969	0.102202	11.7384	8.10167e-32	2.1022e-30
PRR15	638.033	1.1976	0.109446	10.9423	7.23127e-28	1.54492e-26
RLF	727.85	1.1966	0.128493	9.31258	1.24762e-20	1.82474e-19
DLL3	25.9787	1.19653	0.438973	2.72576	0.00641534	0.0174506
ANP32E	443.189	1.19122	0.126305	9.4313	4.05019e-21	6.07928e-20
DNAJC25	584.037	1.18764	0.117634	10.0961	5.75052e-24	1.02142e-22
SETD5	4200.56	1.187	0.0633509	18.7369	2.47599e-78	2.59638e-76
BCL2L1	4322.63	1.18673	0.0735913	16.126	1.67605e-58	1.1269e-56
GTPBP4	2925.7	1.18669	0.0669423	17.7271	2.59264e-70	2.25353e-68
B4GALNT4	367.717	1.18652	0.140471	8.44672	2.99597e-17	3.582e-16
KIAA0895	70.8287	1.1855	0.267042	4.43937	9.02232e-06	4.02158e-05
EFL1	622.768	1.18537	0.0993783	11.9279	8.47005e-33	2.35841e-31
IER5	477.216	1.18527	0.112395	10.5456	5.32423e-26	1.04027e-24
NFKBIA	513.642	1.18386	0.109055	10.8556	1.87492e-27	3.9178e-26
ZNF778	313.027	1.18337	0.133187	8.88499	6.39289e-19	8.52136e-18
TRAF6	767.886	1.18145	0.103214	11.4466	2.44494e-30	5.84026e-29
CRISPLD2	46.2445	1.18127	0.313094	3.7729	0.00016136	0.000596198
UBR4	8232.56	1.18054	0.0639457	18.4616	4.20363e-76	4.05464e-74
BTN2A1	663.105	1.18003	0.100007	11.7995	3.92729e-32	1.04725e-30
LSR	4595.62	1.17895	0.0935276	12.6053	1.97304e-36	6.50848e-35
PVR	3392.86	1.17622	0.0662128	17.7642	1.33889e-70	1.17269e-68
BNIP1	239.352	1.17537	0.147767	7.95418	1.80323e-15	1.93349e-14
TUBA4A	1056.53	1.1747	0.0978742	12.0022	3.46098e-33	9.8528e-32
GPATCH2L	1334.31	1.17424	0.0864711	13.5796	5.291e-42	2.11825e-40
MAP2K1	734.174	1.17164	0.0983194	11.9167	9.69281e-33	2.69232e-31
MALT1	742.961	1.17089	0.102038	11.475	1.76234e-30	4.23629e-29
NSFL1C	2036.55	1.17078	0.0737711	15.8705	1.01505e-56	6.48156e-55
ESAM	76.7355	1.16911	0.249962	4.67714	2.9091e-06	1.38316e-05
YWHAG	4215.44	1.16833	0.0679072	17.2049	2.44093e-66	1.91751e-64
DENND5A	1375.1	1.16817	0.0822995	14.1941	9.96355e-46	4.53719e-44
RABAC1	106.206	1.16775	0.212387	5.49823	3.83627e-08	2.27963e-07
RAB6B	117.162	1.16579	0.2182	5.34276	9.15441e-08	5.21889e-07
XRN1	1241.54	1.16372	0.0935003	12.4461	1.46809e-35	4.64828e-34
OCLN	2726.37	1.1634	0.079083	14.7111	5.47253e-49	2.78004e-47
TFR2	88.076	1.16291	0.240175	4.84194	1.28575e-06	6.41052e-06
STK24	2673.89	1.16288	0.0724856	16.0429	6.40831e-58	4.2096e-56
MOB2	458.255	1.16268	0.119104	9.76191	1.64038e-22	2.70167e-21
EYA3	556.575	1.1626	0.103924	11.187	4.72239e-29	1.06674e-27
MCL1	3263.86	1.16244	0.0689441	16.8606	8.7705e-64	6.66092e-62
CDKN2AIP	593.058	1.16087	0.114824	10.11	4.98711e-24	8.88584e-23
CDCA7L	126.037	1.16086	0.209719	5.5353	3.107e-08	1.86518e-07
RRAGD	412.1	1.16081	0.12727	9.12084	7.45474e-20	1.05265e-18
MTURN	86.85	1.15989	0.240413	4.82458	1.40297e-06	6.96913e-06
STAM	1249.24	1.15668	0.0906749	12.7563	2.87461e-37	9.82265e-36
SERPINB9	351.159	1.15446	0.125123	9.22658	2.79423e-20	4.01484e-19
SH2B2	36.9185	1.15313	0.363238	3.1746	0.00150043	0.00470376
EIF4A2	24006.6	1.15308	0.0652682	17.6667	7.56591e-70	6.52667e-68
UBAP1	1357.28	1.15233	0.0794118	14.5108	1.03558e-47	5.047e-46
IPPK	57.6429	1.15145	0.284903	4.04156	5.30973e-05	0.000211722
RANBP10	1347.18	1.15112	0.0804248	14.313	1.81497e-46	8.46741e-45
CD44	132.176	1.15063	0.193224	5.95489	2.60253e-09	1.7452e-08
ZCCHC7	505.449	1.15037	0.113706	10.1171	4.64047e-24	8.2876e-23
TVP23C	42.6943	1.14868	0.323322	3.55274	0.000381239	0.00132691
ZBTB7A	486.626	1.14759	0.124922	9.18642	4.06129e-20	5.79533e-19
MAPK7	297.277	1.14665	0.135529	8.46052	2.66189e-17	3.1926e-16
H2BC8	132.625	1.14583	0.204979	5.58999	2.27078e-08	1.38464e-07
SEL1L3	518.244	1.14577	0.108351	10.5746	3.90754e-26	7.6873e-25
LGALS3	15261	1.145	0.0564332	20.2895	1.59294e-91	2.05733e-89
CCNB1IP1	2450.9	1.14469	0.0694219	16.4889	4.40623e-61	3.1477e-59
UBFD1	2175.16	1.14438	0.0744285	15.3755	2.3895e-53	1.38993e-51
PEX11A	255.545	1.1413	0.143913	7.93054	2.18199e-15	2.32759e-14
SLC5A3	1816.53	1.13937	0.0972216	11.7193	1.01475e-31	2.60351e-30
TKT	6883.67	1.13806	0.075924	14.9895	8.59623e-51	4.68997e-49
MX1	27.4791	1.13799	0.412044	2.76182	0.00574808	0.0158238
MEF2D	760.7	1.13748	0.0924106	12.309	8.10119e-35	2.47584e-33
CD55	1784.92	1.13722	0.0807218	14.0881	4.49361e-45	2.00633e-43
LRCH1	872.115	1.13596	0.0915348	12.4102	2.30102e-35	7.21555e-34
CLDND1	836.641	1.13471	0.116002	9.78187	1.34705e-22	2.22336e-21
FAM24B	95.8395	1.13463	0.228417	4.96734	6.78773e-07	3.48848e-06
KATNAL1	104.628	1.13415	0.223267	5.07977	3.77892e-07	2.00898e-06
PDK3	390.681	1.13363	0.117558	9.64321	5.25177e-22	8.33197e-21
IRF7	212.377	1.13264	0.182631	6.20178	5.58275e-10	3.95971e-09
LAMC2	4852.17	1.13256	0.0621138	18.2337	2.78823e-74	2.623e-72
TNKS	1367.01	1.13177	0.0866729	13.058	5.72306e-39	2.07008e-37
EXPH5	285.678	1.13174	0.171761	6.58908	4.42573e-11	3.4424e-10
TRNAU1AP	222.909	1.13107	0.15674	7.21621	5.34571e-13	4.82063e-12
SLC25A29	308.545	1.1307	0.137797	8.20554	2.29552e-16	2.60943e-15
INO80D	791.871	1.12962	0.118013	9.57196	1.04901e-21	1.6291e-20
PNPLA8	776.454	1.12922	0.111355	10.1407	3.64475e-24	6.55023e-23
PSMD7	2100.71	1.12879	0.0741459	15.2239	2.45431e-52	1.3922e-50
CBARP	35.448	1.12868	0.370263	3.04834	0.00230112	0.00693888
ELL	270.248	1.12792	0.167068	6.75126	1.46563e-11	1.17807e-10
TET2	901.04	1.12769	0.109271	10.3202	5.71277e-25	1.06957e-23
G6PD	464.842	1.1255	0.111839	10.0636	8.00334e-24	1.41061e-22
TFPI	862.566	1.12456	0.095309	11.7991	3.94465e-32	1.04854e-30
CHRNB1	47.1078	1.12332	0.31164	3.60453	0.000312721	0.00110423
NQO1	2733.49	1.12202	0.0696715	16.1044	2.37643e-58	1.58382e-56
SGCB	45.4144	1.12133	0.343617	3.26331	0.00110119	0.00354155
SINHCAF	2117.38	1.11992	0.0722743	15.4954	3.72788e-54	2.23088e-52
FKBP14	409.04	1.11944	0.120581	9.28376	1.63608e-20	2.3807e-19
CDKL5	1433.19	1.11921	0.0932594	12.001	3.50908e-33	9.97731e-32
ERMP1	1240.23	1.11765	0.102611	10.8921	1.25767e-27	2.65225e-26
LARP6	100.31	1.11728	0.216992	5.14895	2.61952e-07	1.42002e-06
KCNH2	25.0236	1.11627	0.436298	2.55849	0.0105126	0.0271179
SLC3A2	5364.74	1.11594	0.0652793	17.0948	1.62122e-65	1.25631e-63
ZNF90	47.2345	1.11552	0.308821	3.6122	0.000303606	0.00107487
LCP1	962.678	1.11495	0.0929788	11.9915	3.9383e-33	1.11699e-31
TRIM21	527.495	1.11393	0.107796	10.3337	4.96185e-25	9.32028e-24
MIDN	1150.91	1.11321	0.0988022	11.2671	1.90807e-29	4.37497e-28
SLC19A3	2530.71	1.11271	0.075927	14.6551	1.25039e-48	6.22744e-47
BIN3	236.374	1.11192	0.155137	7.16734	7.64714e-13	6.82066e-12
GRPEL1	825.165	1.11175	0.0924512	12.0252	2.61915e-33	7.48422e-32
CASP4	1888.93	1.11169	0.0725342	15.3264	5.0921e-53	2.93953e-51
MACC1	1829.51	1.11155	0.0914072	12.1604	5.05267e-34	1.49617e-32
C8orf58	76.9273	1.11041	0.245483	4.52335	6.08692e-06	2.76909e-05
CNN2	1498.63	1.11002	0.0878701	12.6326	1.39664e-36	4.66772e-35
FAM83B	658.873	1.10923	0.11728	9.45794	3.14067e-21	4.74213e-20
ETS2	814.629	1.10914	0.0900867	12.3119	7.81359e-35	2.39115e-33
HAUS8	162.243	1.10858	0.184214	6.0179	1.76699e-09	1.20219e-08
KIAA1143	845.244	1.10848	0.0882147	12.5657	3.259e-36	1.05976e-34
UGCG	1474.14	1.10834	0.0970346	11.4221	3.24295e-30	7.69022e-29
IFNGR1	3156.14	1.10827	0.0826271	13.4129	5.08298e-41	1.94635e-39
ZXDB	188.964	1.108	0.162273	6.82802	8.60941e-12	7.0719e-11
PTPRH	61.2635	1.10793	0.272864	4.06039	4.89899e-05	0.000196406
IGSF3	1448.98	1.1077	0.0737551	15.0187	5.54128e-51	3.04504e-49
NPAT	1261.24	1.10756	0.111488	9.93442	2.94897e-23	5.01589e-22
MTF1	403.134	1.10743	0.116946	9.46964	2.808e-21	4.24824e-20
NCKIPSD	739.883	1.10738	0.097464	11.3619	6.47181e-30	1.51119e-28
TRIM11	475.574	1.10728	0.11405	9.70871	2.76807e-22	4.48781e-21
PPP1R13L	566.767	1.10708	0.116322	9.51737	1.77621e-21	2.71963e-20
ZNF136	222.281	1.10685	0.157349	7.03434	2.00201e-12	1.7329e-11
SEC24B	1299.6	1.10678	0.097687	11.3299	9.33631e-30	2.16458e-28
RSBN1L	923.932	1.10669	0.101922	10.8582	1.8237e-27	3.81425e-26
TM2D2	567.405	1.10607	0.11123	9.94405	2.67713e-23	4.57393e-22
CCDC32	130.29	1.10495	0.192196	5.74905	8.97439e-09	5.71302e-08
TENT4A	751.805	1.10429	0.0969074	11.3953	4.41297e-30	1.04108e-28
BMT2	218.582	1.10425	0.173971	6.34736	2.19041e-10	1.6111e-09
LEPR	79.1666	1.1034	0.259205	4.25688	2.07303e-05	8.82321e-05
ZNF805	215.776	1.10306	0.178597	6.17625	6.56423e-10	4.62145e-09
VPS37D	52.4069	1.10206	0.30179	3.65173	0.000260476	0.000932136
FAM214B	205.313	1.10193	0.171996	6.40674	1.48669e-10	1.11173e-09
PNKD	1458.66	1.10166	0.0804498	13.6937	1.10718e-42	4.53588e-41
DHDH	67.7275	1.10159	0.277606	3.9682	7.24188e-05	0.000282627
PSMC6	2303.83	1.10144	0.0775915	14.1954	9.77944e-46	4.46224e-44
C18orf25	336.286	1.1007	0.138316	7.95787	1.75022e-15	1.87841e-14
ELOC	497.538	1.09764	0.114941	9.54964	1.30146e-21	2.00751e-20
SEM1	1495.21	1.09761	0.0790455	13.8858	7.72608e-44	3.29858e-42
RASSF5	52.1601	1.09702	0.310704	3.53077	0.000414353	0.00143365
FOXL2NB	47.6047	1.09639	0.312728	3.50589	0.000455091	0.00156183
PTGS2	31.5079	1.09582	0.382111	2.86781	0.00413326	0.0117725
H2BC18	31.0627	1.09559	0.386928	2.83151	0.00463283	0.0130459
RSRC2	2152.87	1.09544	0.0733875	14.9268	2.20657e-50	1.18131e-48
HIGD1A	1406.2	1.09514	0.224865	4.87021	1.11478e-06	5.60083e-06
H2BC11	44.853	1.0951	0.322759	3.39295	0.00069144	0.00230178
NFE2L1	13507.3	1.09454	0.0556724	19.6604	4.71191e-86	5.66917e-84
WSB1	5500.55	1.09368	0.0708113	15.4449	8.16263e-54	4.83414e-52
ARFGAP1	3751.69	1.09305	0.0708617	15.4251	1.10903e-53	6.53412e-52
ZNF329	298.37	1.09231	0.138417	7.89145	2.98692e-15	3.15678e-14
CIR1	1062.3	1.08906	0.0848388	12.8368	1.01968e-37	3.54793e-36
CREG2	550.882	1.08808	0.108277	10.049	9.27664e-24	1.63126e-22
ASPH	5852.98	1.08779	0.0587361	18.52	1.42463e-76	1.40375e-74
TSKU	1204.65	1.08705	0.0926014	11.739	8.04345e-32	2.09184e-30
TAS2R5	43.7707	1.08654	0.333876	3.25432	0.00113666	0.00364432
CTU1	38.9859	1.08641	0.363849	2.98589	0.00282752	0.00835535
EIF4A1	53.8201	1.08595	0.292835	3.7084	0.000208571	0.000758862
CLPB	685.167	1.0858	0.0942817	11.5166	1.0885e-30	2.64995e-29
CTSD	2813.87	1.08499	0.0976704	11.1087	1.13854e-28	2.52444e-27
HCN2	72.3081	1.08406	0.258354	4.19602	2.71649e-05	0.00011363
IL1R2	266.309	1.08405	0.142054	7.63129	2.32417e-14	2.30402e-13
NOS1AP	78.6081	1.08217	0.261307	4.14136	3.45249e-05	0.000141822
ZBTB43	644.573	1.0815	0.112361	9.62523	6.25667e-22	9.85717e-21
GCKR	108.961	1.08115	0.230333	4.69385	2.68107e-06	1.28167e-05
MREG	449.063	1.08067	0.127032	8.50701	1.78476e-17	2.161e-16
APOC3	9293.82	1.08064	0.0747284	14.4609	2.14018e-47	1.03216e-45
DHRS2	319.469	1.07991	0.151587	7.12401	1.04829e-12	9.2382e-12
PIGA	354.433	1.07857	0.135948	7.93369	2.12737e-15	2.27357e-14
RGMA	29.4846	1.07847	0.41528	2.59698	0.00940484	0.0245793
FASTKD5	767.618	1.07492	0.0917079	11.7211	9.93938e-32	2.55584e-30
PLEKHO2	78.0269	1.0739	0.244149	4.39856	1.08971e-05	4.80345e-05
KRT8	24717.1	1.07331	0.0813529	13.1933	9.59487e-40	3.54917e-38
DNAJB2	1104.14	1.07307	0.091413	11.7387	8.07467e-32	2.09758e-30
FBXO42	498.751	1.07028	0.107307	9.97399	1.98113e-23	3.41802e-22
DDX50	1993.3	1.07004	0.0742629	14.4088	4.55656e-47	2.1883e-45
TFE3	739.118	1.06956	0.098152	10.897	1.19088e-27	2.5137e-26
FAM161B	82.0448	1.06871	0.24454	4.37029	1.24083e-05	5.43704e-05
HTATIP2	1684	1.06802	0.0776978	13.7459	5.3932e-43	2.24979e-41
KRBOX4	195.192	1.06742	0.171844	6.21153	5.24695e-10	3.73312e-09
UIMC1	648.422	1.06601	0.0971607	10.9716	5.23205e-28	1.12622e-26
SLC25A38	1081.27	1.06506	0.0850541	12.5221	5.65239e-36	1.8148e-34
FETUB	30.4378	1.06462	0.384146	2.7714	0.00558157	0.0154081
TAF1D	5456.41	1.06383	0.0799424	13.3075	2.09441e-40	7.92685e-39
CEP152	343.312	1.06364	0.126823	8.38674	4.99805e-17	5.88945e-16
TCP11L2	496.542	1.06339	0.111294	9.55485	1.23764e-21	1.91294e-20
JAG1	2401.04	1.06286	0.0674381	15.7605	5.81353e-56	3.66109e-54
ACSL3	5004.62	1.06222	0.0739355	14.3668	8.357e-47	3.94713e-45
ARID5A	46.7273	1.06119	0.325236	3.26284	0.00110302	0.00354642
NGLY1	736.122	1.05991	0.112974	9.38186	6.48171e-21	9.65289e-20
MDM4	856.482	1.05873	0.0950218	11.142	7.83807e-29	1.74979e-27
MDM2	1191.33	1.05835	0.0939189	11.2688	1.87125e-29	4.29486e-28
RNF169	1283.88	1.05694	0.0783237	13.4945	1.68423e-41	6.62678e-40
SDE2	550.964	1.05641	0.112904	9.35674	8.22347e-21	1.21597e-19
GNG5	28.2227	1.05627	0.430406	2.45413	0.0141225	0.0352176
RASSF3	404.04	1.05606	0.118663	8.89971	5.59937e-19	7.50302e-18
OVOL1	731.536	1.05589	0.105259	10.0314	1.10973e-23	1.94245e-22
COPS2	1604.81	1.0554	0.109468	9.64118	5.35677e-22	8.48619e-21
VKORC1	275.673	1.0553	0.144849	7.28552	3.20439e-13	2.93714e-12
NMD3	1551.66	1.0551	0.0899542	11.7293	9.01587e-32	2.32885e-30
TAF10	66.724	1.0545	0.272457	3.87034	0.000108682	0.000412848
PDZD4	58.1787	1.05329	0.281863	3.7369	0.0001863	0.000682285
GPX4	4463.83	1.05287	0.0868778	12.119	8.38062e-34	2.43717e-32
C1orf52	273.411	1.05273	0.150619	6.98932	2.76229e-12	2.36325e-11
PLEKHA4	330.674	1.05249	0.152905	6.88329	5.84873e-12	4.87785e-11
HINFP	1261.69	1.05206	0.0875235	12.0203	2.78021e-33	7.93454e-32
SFXN1	1644.84	1.05179	0.0732059	14.3675	8.27096e-47	3.91458e-45
HSPB1	251.694	1.05167	0.163849	6.41851	1.37618e-10	1.03315e-09
RIMS3	53.0848	1.05137	0.312996	3.35905	0.000782099	0.00257991
TG	85.7241	1.05125	0.237182	4.43226	9.32508e-06	4.14569e-05
RBM7	847.632	1.0502	0.0924672	11.3575	6.80572e-30	1.5843e-28
TOMM20	6094.43	1.05009	0.0720282	14.5789	3.82745e-48	1.89384e-46
ZUP1	308.467	1.04988	0.145925	7.19465	6.26229e-13	5.61396e-12
CAMLG	994.936	1.04855	0.0905111	11.5848	4.92219e-31	1.21645e-29
CALU	6720.67	1.04682	0.0655766	15.9634	2.29967e-57	1.48504e-55
TUBB2A	161.963	1.04667	0.194868	5.37119	7.82181e-08	4.49601e-07
SLC36A2	26.1703	1.04626	0.420383	2.48883	0.0128164	0.0323059
CLN8	588.979	1.04572	0.104337	10.0225	1.21392e-23	2.11833e-22
ARHGEF28	626.272	1.04493	0.101261	10.3192	5.77144e-25	1.07878e-23
SPATS2	1454.37	1.04477	0.0753094	13.8731	9.22324e-44	3.91902e-42
AMOTL2	2998.48	1.04294	0.0744868	14.0016	1.52303e-44	6.69548e-43
GNRH1	73.1339	1.04145	0.263737	3.94884	7.85311e-05	0.000304947
FRK	739.18	1.03983	0.1075	9.67286	3.93216e-22	6.30359e-21
RAB11FIP1	2488.31	1.03967	0.0692539	15.0125	6.08464e-51	3.33561e-49
USP36	1557.08	1.0375	0.0796295	13.0291	8.36417e-39	3.0111e-37
ZHX2	193.82	1.03594	0.17334	5.97632	2.28241e-09	1.53685e-08
EZR	8619.41	1.03579	0.0567272	18.2591	1.75207e-74	1.65506e-72
PNRC1	899.328	1.0356	0.0924941	11.1964	4.24468e-29	9.60727e-28
ZBTB21	523.237	1.03436	0.117447	8.80698	1.28563e-18	1.6794e-17
ZNF263	1171.28	1.03422	0.088427	11.6958	1.33965e-31	3.4119e-30
RFX2	98.5873	1.03411	0.222833	4.64073	3.47188e-06	1.63475e-05
ILK	28.321	1.034	0.40257	2.56849	0.0102142	0.0264256
ALPG	61.4767	1.03395	0.272109	3.79974	0.000144846	0.000538928
TMEM241	95.5584	1.03349	0.226028	4.57239	4.8219e-06	2.22056e-05
GLIPR1	40.6419	1.03348	0.387017	2.67037	0.00757675	0.02022
NARF	986.996	1.03343	0.0837344	12.3417	5.39718e-35	1.66056e-33
GYS1	1637.32	1.03295	0.0903141	11.4373	2.72269e-30	6.48341e-29
PSME4	2682.66	1.03182	0.0893752	11.5448	7.84396e-31	1.92603e-29
MED6	502.409	1.02852	0.116585	8.82207	1.12364e-18	1.47368e-17
CEMIP2	671.922	1.02799	0.102399	10.0392	1.02553e-23	1.79782e-22
AJM1	93.3748	1.02791	0.253193	4.0598	4.9114e-05	0.000196869
ALKBH5	1644.18	1.0279	0.0788165	13.0417	7.08499e-39	2.55462e-37
H4C8	110.181	1.02783	0.205024	5.01321	5.35293e-07	2.79124e-06
OGA	3225.42	1.02756	0.072806	14.1136	3.13106e-45	1.40345e-43
KEAP1	943.453	1.02633	0.0954112	10.7569	5.49896e-27	1.12741e-25
ARG2	72.295	1.02621	0.272756	3.76237	0.00016831	0.000620094
CTTNBP2NL	436.096	1.02611	0.112783	9.09809	9.19311e-20	1.29008e-18
SYT2	44.9607	1.02465	0.332647	3.08029	0.00206801	0.00630413
BTG1	936.159	1.02437	0.0955836	10.717	8.47293e-27	1.7263e-25
SLC29A3	263.193	1.02405	0.144808	7.07174	1.53002e-12	1.33243e-11
WIPF2	2028.53	1.02287	0.0703784	14.5339	7.3883e-48	3.62439e-46
GPA33	375.453	1.0228	0.128885	7.93579	2.09153e-15	2.23736e-14
ZNF525	262.149	1.0211	0.147827	6.90737	4.93736e-12	4.14043e-11
SH3D21	394.251	1.02098	0.131954	7.73739	1.0148e-14	1.03703e-13
SPRY1	244.468	1.02072	0.148508	6.87316	6.27936e-12	5.21228e-11
LMO7	6617.7	1.01953	0.0592525	17.2066	2.37052e-66	1.86862e-64
USP37	549.447	1.01911	0.118053	8.63265	5.99481e-18	7.51842e-17
RUNX3	34.1783	1.01872	0.358228	2.84378	0.00445814	0.0125912
PSMA7	4669.17	1.01834	0.0717831	14.1863	1.11429e-45	5.06416e-44
PRKAB2	2109.49	1.01833	0.0868321	11.7276	9.20462e-32	2.37492e-30
RPL30	4524.25	1.01796	0.0823631	12.3594	4.33506e-35	1.35013e-33
PDLIM2	601.306	1.01788	0.1069	9.52181	1.70182e-21	2.61098e-20
DSG2	1934.03	1.0178	0.0858971	11.8491	2.1754e-32	5.92019e-31
TTC9C	578.859	1.01709	0.100084	10.1623	2.92067e-24	5.29473e-23
HDHD5	943.549	1.01704	0.099581	10.2132	1.73013e-24	3.17422e-23
RPS27	21744.4	1.01608	0.0700322	14.5088	1.06561e-47	5.17195e-46
CCNT1	1329.99	1.01604	0.0807611	12.5808	2.69428e-36	8.78619e-35
RBCK1	1698.71	1.01475	0.0860011	11.7993	3.93535e-32	1.04729e-30
CALCOCO2	8105.76	1.01341	0.0552477	18.3431	3.74911e-75	3.55621e-73
SERPINH1	10043.3	1.01287	0.0678487	14.9284	2.15492e-50	1.15637e-48
MICA	667.958	1.01221	0.0998715	10.1351	3.85964e-24	6.92554e-23
BFAR	1426.91	1.01202	0.0802799	12.6061	1.95331e-36	6.45269e-35
RNF126	488.308	1.01142	0.139233	7.26423	3.7516e-13	3.42498e-12
SLC25A26	450.979	1.01126	0.117275	8.62297	6.52384e-18	8.16284e-17
TP53	120.279	1.01113	0.198496	5.09394	3.5069e-07	1.87527e-06
BAG5	968.822	1.0107	0.0926062	10.914	9.88034e-28	2.09134e-26
ASPRV1	36.5879	1.01068	0.353993	2.85509	0.0043024	0.0122056
RNASEL	471.116	1.01018	0.119584	8.44749	2.97637e-17	3.56043e-16
IGBP1	2393.16	1.00898	0.0699706	14.4201	3.8683e-47	1.86167e-45
TRAPPC2	256.446	1.00719	0.139922	7.19823	6.09975e-13	5.47684e-12
PHRF1	1464.66	1.00697	0.0991185	10.1592	3.01491e-24	5.45692e-23
PITHD1	587.547	1.00618	0.105314	9.5541	1.24658e-21	1.92547e-20
ZNF394	560.709	1.00595	0.107261	9.37851	6.69113e-21	9.9518e-20
IPMK	1124.2	1.00582	0.105639	9.52128	1.71062e-21	2.62271e-20
RINT1	458.233	1.00569	0.131197	7.66549	1.78148e-14	1.78226e-13
RPS25	19988.7	1.00536	0.0699119	14.3804	6.86576e-47	3.26302e-45
GM2A	2425.64	1.00426	0.0747079	13.4425	3.40878e-41	1.323e-39
PSMB7	2090.86	1.00409	0.0759893	13.2135	7.33186e-40	2.72531e-38
SPTY2D1	1170.71	1.00351	0.084428	11.886	1.39954e-32	3.84536e-31
CKS1B	442.149	1.00325	0.119176	8.41823	3.82225e-17	4.54377e-16
MARS2	158.943	-1.00002	0.187522	-5.33283	9.6695e-08	5.49316e-07
MPV17	469.806	-1.00081	0.12726	-7.86429	3.71211e-15	3.91054e-14
SAMD10	102.082	-1.00116	0.21353	-4.68861	2.75071e-06	1.31249e-05
SLC46A1	730.524	-1.0018	0.0981637	-10.2054	1.87478e-24	3.4286e-23
ADARB1	447.655	-1.0026	0.111328	-9.00583	2.14032e-19	2.9386e-18
TTLL1	52.6648	-1.00293	0.305665	-3.28114	0.00103388	0.00334008
SIX5	45.8188	-1.00377	0.326256	-3.07664	0.00209351	0.00637593
PCYOX1L	204.585	-1.00381	0.159674	-6.2866	3.24497e-10	2.35492e-09
DHRS1	302.814	-1.00465	0.136154	-7.37874	1.59798e-13	1.49897e-12
SMC1B	163.798	-1.00486	0.173351	-5.79667	6.76464e-09	4.36219e-08
ANKRD6	142.568	-1.00595	0.190579	-5.27841	1.30308e-07	7.29217e-07
AIFM1	832.507	-1.0062	0.0978381	-10.2844	8.28741e-25	1.5415e-23
ADAMTSL5	268.284	-1.00748	0.141622	-7.11387	1.12833e-12	9.89403e-12
NOS2	148.149	-1.00818	0.179048	-5.63079	1.79389e-08	1.10505e-07
TMEM139	243.259	-1.00826	0.145407	-6.93406	4.0893e-12	3.45204e-11
BIK	29.1444	-1.00885	0.400339	-2.51999	0.0117357	0.0298951
PTPRS	171.725	-1.00943	0.181229	-5.56992	2.54854e-08	1.54658e-07
BORCS7	267.304	-1.01028	0.158549	-6.37205	1.86523e-10	1.38125e-09
DIXDC1	152.623	-1.01072	0.182997	-5.52314	3.33003e-08	1.99122e-07
METTL1	82.082	-1.01207	0.23792	-4.25385	2.10127e-05	8.93508e-05
PAQR8	482.545	-1.01338	0.110721	-9.15258	5.55902e-20	7.89802e-19
ARMCX4	101.703	-1.01489	0.215692	-4.70527	2.53535e-06	1.21429e-05
LRR1	95.0404	-1.01498	0.233478	-4.34721	1.37881e-05	6.00715e-05
AC022137.3	24.4551	-1.01532	0.43446	-2.33698	0.0194402	0.0466663
LRRC19	30.5527	-1.01587	0.432502	-2.34881	0.0188334	0.0454205
ZNF704	201.774	-1.01797	0.164878	-6.17407	6.65553e-10	4.6814e-09
TTC31	654.766	-1.01911	0.0959163	-10.625	2.28058e-26	4.5413e-25
CAMKV	265.083	-1.01925	0.140295	-7.26503	3.72958e-13	3.4076e-12
SLC45A3	473.459	-1.01961	0.111864	-9.11473	7.88675e-20	1.11085e-18
ABCA1	2157.38	-1.02053	0.0729972	-13.9804	2.05206e-44	8.93525e-43
KCNK5	698.948	-1.0209	0.106066	-9.62516	6.26101e-22	9.8572e-21
CERS4	374.277	-1.02185	0.136979	-7.45989	8.65928e-14	8.26173e-13
SLC25A45	87.6335	-1.02274	0.251856	-4.06083	4.8899e-05	0.000196084
DMAC1	356.592	-1.02327	0.126201	-8.10825	5.13541e-16	5.69053e-15
DNASE1	1406.89	-1.02386	0.0816344	-12.542	4.39621e-36	1.41545e-34
ME3	196.923	-1.02397	0.173744	-5.89356	3.77963e-09	2.49934e-08
SLC9B2	366.468	-1.02419	0.119845	-8.54595	1.27488e-17	1.55849e-16
TMEM19	165.294	-1.02463	0.191623	-5.34709	8.93773e-08	5.10154e-07
GABPB2	120.814	-1.02542	0.205367	-4.99309	5.94207e-07	3.08367e-06
IYD	2377.72	-1.026	0.0716705	-14.3155	1.75049e-46	8.18327e-45
RAB3IL1	131.419	-1.02646	0.202883	-5.05938	4.20632e-07	2.22224e-06
TMEM207	311.645	-1.02646	0.151025	-6.79665	1.07077e-11	8.7234e-11
GALNT12	121.525	-1.02773	0.199103	-5.1618	2.44591e-07	1.33064e-06
KBTBD7	184.296	-1.02834	0.163451	-6.29141	3.14588e-10	2.28809e-09
PARS2	121.347	-1.02839	0.206046	-4.99108	6.0044e-07	3.11319e-06
WDR72	436.527	-1.02854	0.129809	-7.92345	2.31015e-15	2.45972e-14
USH1G	77.9683	-1.02889	0.260138	-3.95516	7.64822e-05	0.000297395
ALG8	1209.7	-1.02918	0.0848951	-12.1229	7.98743e-34	2.32602e-32
ZNF620	88.3668	-1.02981	0.232735	-4.4248	9.65321e-06	4.2849e-05
FER1L5	36.3044	-1.03027	0.365497	-2.81881	0.00482019	0.0135136
FAM200A	87.2003	-1.03028	0.234941	-4.38527	1.15844e-05	5.08876e-05
DENND2D	317.502	-1.03036	0.133845	-7.69816	1.38037e-14	1.39501e-13
ZFPM1	158.002	-1.03038	0.203747	-5.05713	4.25612e-07	2.247e-06
GATD3A	27.5444	-1.03072	0.412775	-2.49705	0.0125233	0.0316649
GRIN2C	79.9923	-1.03109	0.241982	-4.26102	2.03497e-05	8.66608e-05
PYCR1	583.787	-1.03116	0.12149	-8.48765	2.10855e-17	2.54093e-16
HOXC11	90.7212	-1.03233	0.228915	-4.50966	6.49304e-06	2.9474e-05
CRELD1	68.8341	-1.03256	0.281458	-3.66859	0.00024389	0.00087745
LDLRAP1	261.862	-1.03272	0.142506	-7.24682	4.26685e-13	3.87525e-12
FASTK	784.051	-1.03412	0.099018	-10.4437	1.56557e-25	2.99489e-24
C6orf47	235.164	-1.03576	0.152404	-6.79613	1.07468e-11	8.75213e-11
COQ2	148.446	-1.03587	0.188274	-5.50193	3.75659e-08	2.23344e-07
MARCHF2	70.4602	-1.03609	0.280306	-3.6963	0.000218766	0.000793054
LRFN4	93.4355	-1.03639	0.225086	-4.60443	4.13601e-06	1.92369e-05
NAT14	136.416	-1.03692	0.205184	-5.05361	4.33538e-07	2.28567e-06
TUBGCP6	577.932	-1.03704	0.110043	-9.42395	4.34413e-21	6.51193e-20
PHETA2	210.289	-1.03707	0.153099	-6.77383	1.25419e-11	1.01598e-10
PDZK1IP1	63.9976	-1.03772	0.270586	-3.83507	0.000125529	0.000472126
SCN3B	44.0764	-1.03956	0.339456	-3.06244	0.00219543	0.00665617
ZNF879	77.5452	-1.03997	0.24925	-4.17239	3.01419e-05	0.000125212
SAMHD1	254.622	-1.04018	0.140568	-7.39986	1.36324e-13	1.28245e-12
ACTL8	417.494	-1.04046	0.130597	-7.96696	1.62629e-15	1.7495e-14
FGB	5616.28	-1.04057	0.0913185	-11.395	4.4299e-30	1.04399e-28
LGALS2	809.366	-1.04061	0.0934067	-11.1406	7.95724e-29	1.77293e-27
TCTN1	93.1602	-1.04206	0.226483	-4.60106	4.20345e-06	1.95307e-05
CLEC2D	59.707	-1.04224	0.280722	-3.7127	0.00020506	0.000747159
ZNF37A	281.022	-1.04317	0.153384	-6.80104	1.03865e-11	8.47076e-11
MYO7A	363.35	-1.04322	0.12936	-8.06443	7.35779e-16	8.06711e-15
GSTZ1	191.29	-1.04394	0.158847	-6.57199	4.96461e-11	3.83935e-10
CRACR2B	122.421	-1.04468	0.211783	-4.93278	8.10685e-07	4.14406e-06
SPAG16	283.364	-1.0447	0.143952	-7.25728	3.94964e-13	3.59716e-12
SOX12	129.376	-1.04528	0.194308	-5.37951	7.46872e-08	4.30605e-07
TTPAL	709.321	-1.04613	0.0932016	-11.2244	3.09398e-29	7.02368e-28
UQCC2	366.212	-1.04666	0.135105	-7.74697	9.41109e-15	9.6431e-14
PABPC1L	965.55	-1.04738	0.098754	-10.6059	2.7971e-26	5.53607e-25
ABHD14A	64.3542	-1.04751	0.287604	-3.64218	0.000270334	0.000965148
HAL	93.7376	-1.04758	0.226354	-4.62807	3.69098e-06	1.73078e-05
APOBEC2	27.2051	-1.04803	0.401654	-2.60929	0.00907294	0.0238262
GPRASP1	47.9837	-1.04827	0.346488	-3.02542	0.00248287	0.00743202
MRI1	116.342	-1.04931	0.222509	-4.71582	2.40743e-06	1.15642e-05
FBXW9	45.9053	-1.04959	0.320709	-3.27273	0.00106514	0.00343476
CYB561A3	179.867	-1.05053	0.167534	-6.27059	3.59692e-10	2.60373e-09
PRLR	203.045	-1.05148	0.16542	-6.35641	2.06529e-10	1.52397e-09
SNX17	745.596	-1.05307	0.101604	-10.3645	3.59542e-25	6.80392e-24
LHX4	66.3761	-1.05413	0.273126	-3.85949	0.000113624	0.000430181
FAM151A	158.149	-1.05507	0.17667	-5.972	2.3436e-09	1.57573e-08
PGAP3	351.011	-1.05576	0.131619	-8.02137	1.04575e-15	1.1383e-14
USP40	535.133	-1.05612	0.113964	-9.26716	1.91169e-20	2.76765e-19
TBCD	771.291	-1.05641	0.101364	-10.4218	1.97082e-25	3.75755e-24
GSTK1	2437.69	-1.05662	0.0718998	-14.6957	6.8676e-49	3.4733e-47
MTARC1	710.403	-1.05716	0.0933025	-11.3305	9.26654e-30	2.15059e-28
MRAS	27.9948	-1.05745	0.415015	-2.54799	0.0108347	0.0278825
MYRF	3087.84	-1.05788	0.0656053	-16.1249	1.70481e-58	1.14287e-56
WDR5B	216.459	-1.05962	0.172085	-6.15753	7.38894e-10	5.17656e-09
SPDYE3	53.857	-1.05975	0.301581	-3.51396	0.000441472	0.0015176
RIDA	295.063	-1.06203	0.147844	-7.18344	6.7981e-13	6.07999e-12
CRYBG1	954.274	-1.06221	0.0860074	-12.3502	4.85965e-35	1.50531e-33
ZDHHC14	262.369	-1.06447	0.141735	-7.51027	5.90049e-14	5.70098e-13
ST6GALNAC1	43.5377	-1.0647	0.322081	-3.30569	0.000947422	0.00307818
TRMT1L	348.976	-1.0655	0.142101	-7.49816	6.4718e-14	6.23979e-13
GSTA2	2433.28	-1.06599	0.0728709	-14.6284	1.84982e-48	9.1928e-47
DDC	1171.86	-1.06696	0.0825122	-12.931	3.00987e-38	1.06646e-36
MAP2K6	378.713	-1.06763	0.126421	-8.44507	3.03859e-17	3.63106e-16
ZDHHC24	367.036	-1.06807	0.131715	-8.10892	5.10718e-16	5.66199e-15
STXBP4	242.864	-1.0689	0.156808	-6.81662	9.32043e-12	7.63674e-11
DYNC2H1	205.457	-1.07036	0.202478	-5.28628	1.24831e-07	7.00795e-07
PRX	74.1103	-1.07065	0.250563	-4.27299	1.92868e-05	8.2472e-05
RHOBTB1	223.522	-1.07118	0.151952	-7.04947	1.79596e-12	1.55928e-11
CPNE7	170.684	-1.07226	0.179022	-5.98955	2.10426e-09	1.42037e-08
SLC4A8	259.602	-1.07297	0.145347	-7.38211	1.55805e-13	1.46391e-12
SLC12A9	483.91	-1.07323	0.108487	-9.89272	4.47715e-23	7.5589e-22
CLCN7	898.896	-1.07363	0.0901455	-11.91	1.04995e-32	2.90228e-31
RWDD2B	220.529	-1.07476	0.162347	-6.62017	3.58783e-11	2.81271e-10
ZC3H4	488.012	-1.07498	0.125066	-8.5953	8.3049e-18	1.03011e-16
P2RY1	299.426	-1.07505	0.132105	-8.13785	4.02354e-16	4.49331e-15
MACROD2	44.3858	-1.0756	0.346733	-3.10209	0.00192157	0.00589942
FMO5	438.941	-1.07576	0.121562	-8.8495	8.79133e-19	1.16235e-17
PDZD3	649.209	-1.07584	0.109128	-9.8585	6.29827e-23	1.05479e-21
PIFO	31.5015	-1.07705	0.380764	-2.82865	0.00467452	0.0131471
TMTC4	596.5	-1.07729	0.102022	-10.5593	4.59962e-26	9.02552e-25
GASK1B	404.188	-1.07932	0.134594	-8.01908	1.06544e-15	1.15816e-14
DRD2	40.0229	-1.08172	0.365722	-2.95777	0.00309877	0.00908062
CCDC18	51.9749	-1.08239	0.298806	-3.6224	0.000291882	0.00103561
RFX5	310.353	-1.08255	0.135993	-7.96038	1.7151e-15	1.84244e-14
PRDM1	409.099	-1.0828	0.124922	-8.66786	4.40322e-18	5.5766e-17
P3H4	367.533	-1.08315	0.129454	-8.36703	5.90876e-17	6.93756e-16
TECPR2	116.653	-1.08469	0.201424	-5.3851	7.24042e-08	4.17864e-07
PCED1A	498.986	-1.085	0.116158	-9.34077	9.5638e-21	1.40688e-19
MCF2L	486.241	-1.08576	0.114492	-9.4833	2.46372e-21	3.73727e-20
SLC6A20	286.537	-1.08653	0.140631	-7.72609	1.10898e-14	1.12873e-13
RUVBL1	424.264	-1.08678	0.119473	-9.09647	9.33123e-20	1.30866e-18
PKD2	68.6892	-1.08787	0.261933	-4.15321	3.2784e-05	0.000135219
SORD	730.784	-1.08796	0.0934308	-11.6446	2.44531e-31	6.1361e-30
DCDC2	641.616	-1.0881	0.101767	-10.6921	1.10889e-26	2.25327e-25
TP53I3	90.7982	-1.08833	0.228362	-4.76581	1.88098e-06	9.17218e-06
ACADSB	1771.96	-1.089	0.0830374	-13.1146	2.71527e-39	9.93136e-38
IRAK4	227.559	-1.08987	0.147672	-7.38038	1.57839e-13	1.48181e-12
FAHD1	455.709	-1.09046	0.113422	-9.6142	6.96519e-22	1.09357e-20
HMGB3	277.463	-1.09184	0.14121	-7.73204	1.05838e-14	1.08011e-13
STKLD1	38.5214	-1.09189	0.362231	-3.01436	0.00257524	0.00768637
BOP1	260.523	-1.09212	0.145722	-7.49451	6.65485e-14	6.40547e-13
TTC28	183.801	-1.09222	0.166365	-6.56516	5.19757e-11	4.01407e-10
MUC17	1969.15	-1.09241	0.0833364	-13.1084	2.9472e-39	1.07624e-37
MTBP	80.469	-1.09287	0.277787	-3.9342	8.34745e-05	0.0003231
CEBPA	852.479	-1.09292	0.105839	-10.3262	5.36466e-25	1.00604e-23
COMMD8	101.476	-1.09378	0.227259	-4.81293	1.48735e-06	7.36424e-06
NXPH3	51.8723	-1.09412	0.298727	-3.6626	0.000249669	0.000896409
C1QL4	26.9433	-1.09519	0.4407	-2.48512	0.0129507	0.0326013
FRY	142.144	-1.09653	0.194087	-5.64965	1.60773e-08	9.96817e-08
NBEAL2	569.402	-1.09754	0.105268	-10.4261	1.88429e-25	3.59857e-24
TMEM184A	293.697	-1.0981	0.138417	-7.93329	2.13422e-15	2.27982e-14
SLC30A10	61.7232	-1.09925	0.283222	-3.88122	0.000103934	0.000396121
FXN	22.4316	-1.0993	0.450592	-2.43969	0.0147	0.0364826
BACE1	197.685	-1.10085	0.161186	-6.82968	8.51048e-12	6.99567e-11
PLEKHN1	26.3892	-1.10088	0.431189	-2.55314	0.0106757	0.0274982
FMNL1	32.0288	-1.10116	0.389538	-2.82684	0.00470097	0.013215
DMAP1	479.76	-1.10183	0.111377	-9.89274	4.47616e-23	7.5589e-22
HECW2	26.2824	-1.10221	0.446352	-2.46937	0.0135351	0.0339156
TEX261	875.701	-1.10258	0.0905418	-12.1775	4.09528e-34	1.21899e-32
CISD3	99.4401	-1.10307	0.217992	-5.06014	4.18955e-07	2.21389e-06
EPOR	118.65	-1.10315	0.205796	-5.3604	8.30371e-08	4.75729e-07
ACBD4	309.41	-1.10321	0.134004	-8.23264	1.83134e-16	2.09742e-15
ACOT1	55.4879	-1.10379	0.298319	-3.70002	0.000215581	0.000782003
NYNRIN	668.959	-1.10389	0.101619	-10.863	1.73059e-27	3.62283e-26
OSBPL7	371.632	-1.1041	0.122683	-8.99964	2.26457e-19	3.1036e-18
LIN7A	69.1501	-1.10489	0.306419	-3.6058	0.000311189	0.0010995
MYPOP	67.1491	-1.10493	0.268508	-4.11505	3.87091e-05	0.000157875
GPD1L	189.795	-1.10619	0.165312	-6.69153	2.20846e-11	1.75297e-10
OCA2	118.478	-1.10713	0.20558	-5.38538	7.22909e-08	4.17316e-07
HOXA9	24.2072	-1.1075	0.459768	-2.40882	0.0160041	0.0392927
TTLL6	57.32	-1.10802	0.286988	-3.86085	0.000112993	0.000428007
ZNF641	231.27	-1.10855	0.149472	-7.41644	1.20315e-13	1.13512e-12
FAM169A	166.382	-1.10933	0.171982	-6.45029	1.11635e-10	8.43348e-10
ATG16L2	312.491	-1.10957	0.154833	-7.16625	7.70775e-13	6.86401e-12
ACTL10	22.8521	-1.1097	0.450882	-2.46119	0.0138478	0.0346005
SRD5A3	178.47	-1.11022	0.167619	-6.62346	3.50883e-11	2.75264e-10
ABCC9	346.297	-1.11084	0.141897	-7.82846	4.93879e-15	5.16708e-14
COX18	175.884	-1.11116	0.169443	-6.55773	5.46328e-11	4.21074e-10
MOCS3	234.685	-1.11126	0.145209	-7.65285	1.96566e-14	1.96137e-13
ZCCHC14	940.98	-1.11146	0.0856213	-12.9812	1.56484e-38	5.58941e-37
ROGDI	64.7312	-1.11181	0.267649	-4.15398	3.26744e-05	0.000134826
ANKRD36C	105.302	-1.1124	0.212417	-5.23689	1.63305e-07	9.06104e-07
ZNF107	149.888	-1.11292	0.192433	-5.78339	7.32106e-09	4.70507e-08
SYTL5	204.331	-1.11365	0.159168	-6.99668	2.62093e-12	2.24989e-11
CERCAM	76.9791	-1.11399	0.272941	-4.08143	4.47591e-05	0.000180649
PROB1	45.4894	-1.11562	0.333668	-3.3435	0.000827292	0.00271645
STIM2	220.094	-1.11921	0.153693	-7.28209	3.28677e-13	3.01145e-12
GLS2	23.4135	-1.11937	0.452673	-2.47281	0.0134057	0.0336061
SFRP5	41.7184	-1.1194	0.415436	-2.69452	0.00704908	0.0189735
ANTKMT	61.6526	-1.11991	0.293564	-3.81489	0.000136241	0.000509317
PEPD	1618.84	-1.12074	0.0879621	-12.7412	3.48883e-37	1.18683e-35
MTCL1	221.454	-1.12087	0.151057	-7.4202	1.16941e-13	1.10603e-12
PEX10	129.004	-1.12144	0.208628	-5.3753	7.64571e-08	4.40254e-07
VDR	342.423	-1.1216	0.132123	-8.48903	2.08375e-17	2.51237e-16
SIRT5	316.212	-1.12218	0.148432	-7.56025	4.02302e-14	3.94028e-13
DHRS4L2	35.476	-1.12262	0.399185	-2.81227	0.00491931	0.0137611
TSTD1	160.423	-1.12269	0.19936	-5.63146	1.78689e-08	1.10133e-07
FOXRED2	1852.26	-1.12273	0.073878	-15.1971	3.69507e-52	2.08052e-50
MLXIPL	351.497	-1.12319	0.14674	-7.65428	1.94395e-14	1.94055e-13
KBTBD11	359.486	-1.12371	0.131268	-8.56038	1.12495e-17	1.38112e-16
NECTIN3	930.631	-1.12375	0.112234	-10.0125	1.34267e-23	2.3341e-22
RAB3D	506.459	-1.12399	0.121102	-9.28138	1.67303e-20	2.43137e-19
DUOX1	32.6422	-1.12435	0.419534	-2.67999	0.00736237	0.0197169
MPV17L	25.7469	-1.12443	0.437322	-2.57117	0.0101356	0.0262371
GLUD2	55.377	-1.12446	0.332459	-3.38224	0.000718975	0.00238511
FUOM	406.465	-1.12446	0.122168	-9.2042	3.44211e-20	4.92408e-19
LPCAT3	720.489	-1.12475	0.0929969	-12.0945	1.12927e-33	3.25538e-32
L3HYPDH	93.2615	-1.12481	0.224419	-5.01208	5.38439e-07	2.80637e-06
BIVM	213.352	-1.12568	0.155279	-7.24944	4.18499e-13	3.80393e-12
C3orf62	112.187	-1.12627	0.222302	-5.06639	4.05432e-07	2.14641e-06
ALDH4A1	141.356	-1.12695	0.190493	-5.91596	3.29944e-09	2.19306e-08
CATSPERG	41.1272	-1.12718	0.358351	-3.14547	0.00165818	0.00514956
PID1	73.2381	-1.1273	0.251638	-4.47985	7.46972e-06	3.3627e-05
GDF7	234.37	-1.12823	0.149335	-7.55507	4.18639e-14	4.09503e-13
AFM	54.711	-1.12829	0.300661	-3.75269	0.000174945	0.000643274
MROH8	36.7379	-1.129	0.357915	-3.15439	0.00160833	0.00500978
HPX	1057.66	-1.12903	0.0970807	-11.6299	2.90572e-31	7.25953e-30
UROD	287.797	-1.12935	0.155942	-7.24215	4.41619e-13	4.00136e-12
RBP5	116.73	-1.13021	0.217474	-5.19698	2.02552e-07	1.1136e-06
DLL4	55.0788	-1.13071	0.334939	-3.37588	0.000735792	0.00243771
ZBED8	118.361	-1.13191	0.207738	-5.44874	5.0728e-08	2.97268e-07
GVQW3	904.317	-1.1325	0.0995757	-11.3733	5.67981e-30	1.33033e-28
PEX7	110.278	-1.13254	0.213351	-5.30834	1.1063e-07	6.24909e-07
EPHA1	777.189	-1.13264	0.0931163	-12.1637	4.84925e-34	1.43779e-32
SARM1	245.913	-1.13386	0.149247	-7.59722	3.02567e-14	2.98133e-13
SEPHS2	3190.01	-1.1341	0.0633447	-17.9037	1.10357e-71	9.89317e-70
PCYT2	1215.16	-1.13509	0.0900957	-12.5987	2.14689e-36	7.07175e-35
VPS9D1	119.87	-1.13512	0.206172	-5.50572	3.67664e-08	2.18761e-07
MYCL	74.9534	-1.13648	0.275913	-4.11898	3.80546e-05	0.000155372
NIPSNAP1	2181.05	-1.13652	0.080215	-14.1684	1.43768e-45	6.50797e-44
RNF128	1479.3	-1.13679	0.0762999	-14.899	3.34492e-50	1.77002e-48
ZNF599	59.666	-1.13684	0.31389	-3.62177	0.000292594	0.00103765
ORAI3	38.3518	-1.13684	0.357192	-3.18273	0.00145896	0.00458758
PURB	853.05	-1.13694	0.105005	-10.8275	2.55017e-27	5.29491e-26
KIAA0513	162.009	-1.13824	0.179386	-6.3452	2.22137e-10	1.63282e-09
DZIP3	581.021	-1.13858	0.12625	-9.01843	1.90801e-19	2.63389e-18
GOPC	597.44	-1.14009	0.127283	-8.95714	3.33212e-19	4.52867e-18
ARFRP1	560.268	-1.14099	0.106588	-10.7047	9.67617e-27	1.96795e-25
LGALS4	33.0029	-1.14171	0.403788	-2.82749	0.0046915	0.0131916
PHETA1	259.94	-1.14192	0.162165	-7.04168	1.89939e-12	1.64782e-11
CDNF	64.1595	-1.14304	0.27691	-4.12785	3.66164e-05	0.000149848
RECQL5	466.471	-1.1436	0.112526	-10.163	2.90112e-24	5.26763e-23
PCDH7	53.5201	-1.1438	0.309963	-3.69012	0.00022415	0.00081154
GALK1	409.853	-1.14431	0.123461	-9.26861	1.88587e-20	2.73373e-19
TFEC	3345	-1.14448	0.100529	-11.3846	4.99095e-30	1.1738e-28
PRDM11	185.292	-1.14595	0.166973	-6.86308	6.73922e-12	5.57981e-11
TMEM82	125.947	-1.1462	0.203091	-5.64379	1.66344e-08	1.02913e-07
ABCC4	745.479	-1.14722	0.0973081	-11.7895	4.41999e-32	1.17217e-30
GALT	449.244	-1.14756	0.116311	-9.86632	5.82644e-23	9.772e-22
TTLL11	32.2983	-1.14803	0.378128	-3.03607	0.00239683	0.00720087
VANGL1	189.622	-1.14861	0.179458	-6.40044	1.54931e-10	1.15516e-09
HEMK1	343.909	-1.14923	0.129907	-8.84654	9.02781e-19	1.19155e-17
UNC13D	32.2157	-1.14979	0.406876	-2.82589	0.00471496	0.0132527
MEGF8	518.257	-1.15073	0.105034	-10.9558	6.23099e-28	1.33747e-26
TNFAIP8L1	320.129	-1.1517	0.138119	-8.33843	7.52823e-17	8.77589e-16
SLC37A4	2178.85	-1.15172	0.0775737	-14.8467	7.30278e-50	3.82893e-48
PIMREG	71.3074	-1.1533	0.288482	-3.99782	6.39292e-05	0.000251839
TMEM150B	61.5358	-1.15377	0.270519	-4.265	1.99898e-05	8.52771e-05
TTPA	30.2876	-1.15379	0.389043	-2.9657	0.00301993	0.00886778
GPLD1	125.345	-1.15473	0.194631	-5.93292	2.97598e-09	1.98283e-08
MYO1D	3675.09	-1.15494	0.0664051	-17.3924	9.41988e-68	7.80212e-66
RXYLT1	49.4072	-1.15511	0.332316	-3.47595	0.000509052	0.00173349
MUC5AC	30.7662	-1.15605	0.410565	-2.81575	0.00486636	0.013628
FKTN	424.795	-1.1572	0.119028	-9.72208	2.42764e-22	3.95833e-21
GCFC2	228.676	-1.15922	0.165933	-6.98607	2.82685e-12	2.41576e-11
UCP2	521.818	-1.15949	0.109862	-10.554	4.86808e-26	9.52777e-25
ST3GAL2	379.386	-1.16031	0.153495	-7.55923	4.05463e-14	3.96954e-13
FABP5	20.9391	-1.16123	0.480397	-2.41724	0.0156387	0.0385321
FCSK	426.427	-1.16128	0.119726	-9.6995	3.02993e-22	4.89154e-21
SLC29A2	521.206	-1.16336	0.113382	-10.2605	1.06117e-24	1.96265e-23
UPB1	303.557	-1.16348	0.131252	-8.86441	7.6907e-19	1.01918e-17
FADS1	2484.79	-1.16362	0.0716678	-16.2364	2.78977e-59	1.89804e-57
TMEM38A	139.226	-1.16372	0.20414	-5.70058	1.19404e-08	7.49882e-08
SLC35F6	375.709	-1.16405	0.121893	-9.54976	1.29992e-21	2.00649e-20
CYP4F3	384.937	-1.16501	0.124539	-9.35461	8.39056e-21	1.23907e-19
DEPDC1B	471.872	-1.16596	0.11983	-9.73017	2.24224e-22	3.66388e-21
XYLB	780.588	-1.17004	0.0981255	-11.9239	8.88622e-33	2.47128e-31
TMEM150C	54.4246	-1.17013	0.302982	-3.86205	0.000112442	0.000426413
PHGDH	1986.61	-1.17031	0.0792431	-14.7686	2.33657e-49	1.20302e-47
GDPD1	27.9188	-1.17109	0.436746	-2.68139	0.00733162	0.0196484
FAHD2A	162.182	-1.17257	0.184673	-6.34945	2.16093e-10	1.59094e-09
GREB1	17.5684	-1.17298	0.507131	-2.31296	0.0207247	0.0493405
SLC9A3	60.5053	-1.1731	0.292102	-4.01606	5.91798e-05	0.000234138
ZC3H10	42.9064	-1.1731	0.333578	-3.51673	0.000436898	0.00150324
HENMT1	223.213	-1.17386	0.154599	-7.59295	3.12708e-14	3.07993e-13
PSD4	514.094	-1.17406	0.131329	-8.93986	3.89646e-19	5.26437e-18
ERCC4	72.0397	-1.17582	0.263506	-4.46223	8.11106e-06	3.63852e-05
SORBS2	473.621	-1.17608	0.118076	-9.96037	2.27222e-23	3.90549e-22
CHI3L1	151.65	-1.17649	0.236067	-4.98371	6.23757e-07	3.22131e-06
TSPAN18	115.379	-1.17703	0.212831	-5.53034	3.19617e-08	1.91569e-07
FGFR4	1636.96	-1.17757	0.0793773	-14.835	8.69449e-50	4.54819e-48
HIBCH	579.879	-1.17777	0.107955	-10.9099	1.03371e-27	2.18397e-26
SUGCT	165.805	-1.17891	0.174197	-6.76769	1.30857e-11	1.05628e-10
GALE	555.752	-1.18019	0.117012	-10.086	6.37039e-24	1.12715e-22
MYRFL	37.3321	-1.18171	0.357846	-3.30227	0.000959055	0.00311465
CA2	122.957	-1.18223	0.223136	-5.29826	1.16913e-07	6.5861e-07
SLC44A3	514.681	-1.18241	0.112158	-10.5424	5.50538e-26	1.07291e-24
LMO4	827.333	-1.18296	0.0915549	-12.9207	3.43836e-38	1.21298e-36
PBLD	2421.73	-1.18359	0.0678655	-17.4402	4.08684e-68	3.42217e-66
LARGE2	168.813	-1.18362	0.17773	-6.65967	2.74445e-11	2.16488e-10
TNXB	157.218	-1.18419	0.18593	-6.36904	1.90216e-10	1.40678e-09
HPDL	474.196	-1.1842	0.117138	-10.1094	5.01871e-24	8.93519e-23
ZNF75A	201.532	-1.18519	0.163046	-7.26902	3.62101e-13	3.30972e-12
PIGM	316.751	-1.18547	0.137235	-8.63828	5.70663e-18	7.17172e-17
GLUD1	10741.6	-1.18605	0.0723005	-16.4044	1.77785e-60	1.24286e-58
ADCK1	110.828	-1.18631	0.224301	-5.28891	1.23049e-07	6.91471e-07
ZNF514	469.536	-1.18883	0.114829	-10.353	4.05378e-25	7.64599e-24
AARS2	283.217	-1.19045	0.146714	-8.11408	4.89487e-16	5.44245e-15
PRSS1	71.7149	-1.19179	0.284946	-4.1825	2.88318e-05	0.000120185
CRTC1	283.352	-1.19214	0.139806	-8.52715	1.49999e-17	1.82296e-16
TMCO6	223.636	-1.19247	0.162313	-7.34673	2.03108e-13	1.88895e-12
HMGA2	534.853	-1.19356	0.11857	-10.0663	7.78713e-24	1.37356e-22
LHPP	338.065	-1.19382	0.135733	-8.79531	1.42652e-18	1.85181e-17
SPRYD4	187.733	-1.19411	0.176375	-6.77026	1.28548e-11	1.03874e-10
SDC1	624.194	-1.19495	0.102614	-11.6451	2.43096e-31	6.10679e-30
EEF1E1	85.8546	-1.19609	0.240921	-4.96467	6.88191e-07	3.5337e-06
MSH5	118.196	-1.19644	0.217412	-5.50309	3.73194e-08	2.21993e-07
DNAH1	452.332	-1.19648	0.132422	-9.03535	1.63484e-19	2.26225e-18
ZNF688	71.9575	-1.1969	0.25852	-4.62983	3.65971e-06	1.71824e-05
SLC38A7	337.586	-1.19862	0.128436	-9.33238	1.03522e-20	1.5209e-19
CFAP65	37.9621	-1.19921	0.354559	-3.38226	0.000718927	0.00238511
ALS2CL	761.755	-1.19927	0.114569	-10.4677	1.21563e-25	2.33328e-24
RYR2	208.758	-1.20073	0.167863	-7.15302	8.48872e-13	7.536e-12
CYP2R1	323.16	-1.20111	0.145591	-8.24987	1.58572e-16	1.82159e-15
SKP2	2222.47	-1.20113	0.0734481	-16.3534	4.11248e-60	2.84883e-58
SULT1C2	1514.3	-1.20195	0.0973285	-12.3495	4.90359e-35	1.51686e-33
ARHGAP28	410.495	-1.20269	0.120153	-10.0096	1.38274e-23	2.4001e-22
COX11	435.845	-1.2028	0.132608	-9.0703	1.18689e-19	1.65542e-18
CCDC170	105.415	-1.20318	0.210142	-5.72553	1.03111e-08	6.52216e-08
CLDN16	73.5233	-1.20388	0.251607	-4.78476	1.71193e-06	8.40342e-06
RAB27A	309.266	-1.20436	0.139105	-8.65789	4.80588e-18	6.06639e-17
CCDC159	109.848	-1.20485	0.222613	-5.41231	6.22164e-08	3.61992e-07
RTN4IP1	111.085	-1.20494	0.222261	-5.4213	5.91685e-08	3.4505e-07
SELENON	786.794	-1.20541	0.103017	-11.701	1.2592e-31	3.21983e-30
RGL1	1197.02	-1.20605	0.0942617	-12.7947	1.7553e-37	6.06134e-36
ZNF493	120.357	-1.20639	0.209271	-5.76471	8.17979e-09	5.22027e-08
APEH	1400.5	-1.20817	0.0884433	-13.6604	1.75065e-42	7.13368e-41
MEGF6	117.344	-1.20927	0.229096	-5.27842	1.30302e-07	7.29217e-07
ETAA1	234.269	-1.20993	0.156579	-7.72728	1.09868e-14	1.11875e-13
SLC27A3	337.889	-1.21125	0.141484	-8.56106	1.11834e-17	1.37374e-16
MYL5	120.042	-1.21143	0.210722	-5.74895	8.97998e-09	5.71499e-08
ACSM2B	16.6548	-1.21149	0.515776	-2.34887	0.0188304	0.0454205
NPR2	94.5409	-1.2134	0.225715	-5.37579	7.62483e-08	4.39273e-07
NAPEPLD	723.713	-1.21346	0.100002	-12.1344	6.93924e-34	2.03113e-32
TBC1D7	146.409	-1.21404	0.186948	-6.49396	8.36088e-11	6.36887e-10
FMO4	126.798	-1.21468	0.20302	-5.98307	2.18974e-09	1.47575e-08
ACTR3C	52.9859	-1.21515	0.319787	-3.79988	0.000144765	0.000538715
SSTR1	428.991	-1.21729	0.119277	-10.2056	1.87206e-24	3.42636e-23
ATP6V1E2	55.1783	-1.21769	0.291976	-4.1705	3.03928e-05	0.000126186
PGGHG	883.337	-1.21824	0.0904381	-13.4704	2.33488e-41	9.12397e-40
SLC25A20	447.163	-1.21867	0.111641	-10.916	9.6655e-28	2.04776e-26
NPEPL1	43.6128	-1.21879	0.337835	-3.60765	0.000308986	0.00109222
CAD	1482.47	-1.21883	0.0816276	-14.9315	2.05478e-50	1.10523e-48
ELAC1	36.6158	-1.21892	0.356378	-3.42031	0.000625505	0.00209571
MC1R	23.1937	-1.22258	0.452439	-2.7022	0.00688831	0.0185867
ZBED3	711.082	-1.2229	0.099488	-12.2919	1.00065e-34	3.04187e-33
PYGO1	124.711	-1.22427	0.211593	-5.78596	7.20976e-09	4.63876e-08
SV2A	23.396	-1.22496	0.442455	-2.76855	0.0056306	0.0155274
GNAZ	36.0713	-1.22535	0.367368	-3.3355	0.00085147	0.00279022
EEF2KMT	44.1316	-1.22553	0.338966	-3.61551	0.000299761	0.00106192
NMNAT3	205.799	-1.22599	0.167852	-7.30397	2.79399e-13	2.56921e-12
DNAAF2	180.157	-1.22623	0.172367	-7.11405	1.12686e-12	9.88491e-12
TANGO6	123.752	-1.22714	0.20388	-6.01892	1.75583e-09	1.19495e-08
FAM184A	84.7455	-1.22751	0.238784	-5.14069	2.73731e-07	1.47966e-06
DPAGT1	1026.88	-1.23143	0.0951091	-12.9475	2.4271e-38	8.64228e-37
GAMT	340.676	-1.23203	0.130303	-9.4551	3.22701e-21	4.86605e-20
MCRIP1	189.441	-1.23231	0.17066	-7.22083	5.16712e-13	4.66142e-12
EGFR	2040.96	-1.23269	0.068228	-18.0672	5.77842e-73	5.28379e-71
MZF1	175.16	-1.23332	0.170626	-7.22821	4.89407e-13	4.42382e-12
SIRT4	23.3398	-1.23474	0.440109	-2.80554	0.00502322	0.0140277
CTPS1	495.633	-1.23624	0.110458	-11.1919	4.46511e-29	1.00962e-27
COQ5	458.259	-1.23799	0.111349	-11.1181	1.02446e-28	2.28035e-27
ERLIN2	883.684	-1.23836	0.0872269	-14.197	9.56246e-46	4.37196e-44
ZNF324B	31.5389	-1.23853	0.417594	-2.96588	0.00301822	0.0088639
SNTB1	1086.02	-1.23874	0.0885858	-13.9835	1.96521e-44	8.58982e-43
EPHB2	309.394	-1.24017	0.154609	-8.02132	1.04618e-15	1.1383e-14
ZNF774	125.345	-1.24076	0.222792	-5.56911	2.56039e-08	1.55253e-07
SLC17A4	445.765	-1.242	0.149434	-8.31138	9.45951e-17	1.09769e-15
PLXNC1	695.94	-1.24317	0.100625	-12.3545	4.60382e-35	1.428e-33
ADCK5	127.542	-1.24322	0.212989	-5.83699	5.31534e-09	3.4608e-08
LGSN	957.14	-1.24342	0.0926739	-13.4171	4.80084e-41	1.84449e-39
PDE6A	164.789	-1.2438	0.178934	-6.95114	3.6234e-12	3.07009e-11
AGBL2	99.5152	-1.24409	0.225256	-5.52301	3.33232e-08	1.99207e-07
PGBD4	83.1483	-1.24622	0.24246	-5.1399	2.7489e-07	1.48522e-06
CA8	18.2507	-1.2471	0.532456	-2.34216	0.0191726	0.0461111
CCDC61	87.3949	-1.2476	0.241128	-5.17403	2.29094e-07	1.2508e-06
METTL27	16.7941	-1.24902	0.516018	-2.4205	0.0154994	0.0382341
OXLD1	168.476	-1.24945	0.171042	-7.30495	2.77379e-13	2.55166e-12
TMEM64	425.625	-1.25057	0.148593	-8.4161	3.89219e-17	4.6221e-16
HEATR5A	214.705	-1.25108	0.172904	-7.23569	4.63185e-13	4.19177e-12
LYRM9	92.877	-1.25357	0.235568	-5.32149	1.02919e-07	5.82645e-07
NEURL1	28.0041	-1.25392	0.436979	-2.86952	0.00411091	0.0117206
NDOR1	110.57	-1.25551	0.22924	-5.47686	4.32936e-08	2.55645e-07
ARSD	20.4076	-1.25561	0.497562	-2.52352	0.0116185	0.0296428
LRRC14	171.651	-1.25596	0.172252	-7.29143	3.06692e-13	2.81453e-12
AGL	688.829	-1.25621	0.106908	-11.7503	7.03282e-32	1.83528e-30
PIGQ	139.109	-1.25625	0.199228	-6.30558	2.87123e-10	2.095e-09
RHBDF2	141.76	-1.25743	0.209085	-6.01397	1.81035e-09	1.23059e-08
IFI35	229.442	-1.25756	0.164422	-7.64835	2.03568e-14	2.02681e-13
ATP6AP1L	45.5636	-1.25767	0.34044	-3.69426	0.000220531	0.000799197
MYH7B	38.5603	-1.25801	0.36089	-3.48587	0.000490546	0.00167396
CYP2W1	614.443	-1.25982	0.125828	-10.0123	1.34628e-23	2.3386e-22
OAS3	310.513	-1.25985	0.134375	-9.37565	6.8753e-21	1.02191e-19
ALDH3B1	915.455	-1.26014	0.106587	-11.8226	2.9847e-32	8.03653e-31
ZNF662	147.877	-1.26022	0.196446	-6.41512	1.40709e-10	1.05532e-09
NT5E	236.096	-1.26115	0.164463	-7.6683	1.74288e-14	1.7444e-13
TKFC	441.159	-1.26126	0.117328	-10.7498	5.9394e-27	1.21336e-25
GHDC	371.438	-1.26126	0.136161	-9.263	1.98759e-20	2.87572e-19
FANCF	198.667	-1.26159	0.168269	-7.49748	6.50563e-14	6.26712e-13
CATSPER2	48.7228	-1.26188	0.318254	-3.96502	7.33897e-05	0.000286197
LNP1	33.9492	-1.26371	0.415933	-3.03825	0.0023796	0.00715289
UROS	524.442	-1.26533	0.116742	-10.8386	2.25795e-27	4.69669e-26
ANKLE1	105.872	-1.26795	0.224498	-5.64794	1.62381e-08	1.00597e-07
TIGD3	30.6202	-1.26907	0.409174	-3.10154	0.00192519	0.00590973
RNF157	333.396	-1.26946	0.142099	-8.93366	4.12158e-19	5.56195e-18
TRNP1	269.857	-1.26959	0.161156	-7.87805	3.32517e-15	3.50939e-14
MMAB	412.435	-1.2704	0.122938	-10.3337	4.9606e-25	9.32028e-24
FOXN1	17.9468	-1.27141	0.518256	-2.45325	0.014157	0.0353
PHYH	2017.02	-1.27175	0.0698679	-18.2022	4.95499e-74	4.60452e-72
GRK4	18.5343	-1.27355	0.527514	-2.41424	0.0157679	0.0388002
GSTA4	433.678	-1.27471	0.119949	-10.6271	2.22974e-26	4.4478e-25
C19orf57	58.3097	-1.27499	0.291471	-4.37432	1.21809e-05	5.34259e-05
RAD9B	26.4531	-1.27509	0.461332	-2.76392	0.0057111	0.0157315
DEPTOR	167.572	-1.27567	0.179824	-7.09403	1.30265e-12	1.13789e-11
LRRC7	81.9496	-1.27755	0.241783	-5.28388	1.26477e-07	7.09863e-07
IGSF9	628.448	-1.27795	0.10661	-11.9872	4.14575e-33	1.17292e-31
COCH	80.7016	-1.27859	0.254346	-5.02699	4.9824e-07	2.60516e-06
ZNF66	27.542	-1.27892	0.41275	-3.09853	0.00194482	0.00596439
FTCD	44.903	-1.27918	0.357589	-3.57725	0.000347231	0.00121875
SLIT1	18.6533	-1.2795	0.515199	-2.4835	0.0130097	0.0327355
CHAC1	32.5237	-1.27971	0.38394	-3.3331	0.00085885	0.00281118
SLC25A11	290.645	-1.28043	0.154576	-8.28347	1.19632e-16	1.38191e-15
NTN4	629.233	-1.28173	0.104815	-12.2285	2.18964e-34	6.55173e-33
AGBL3	38.2722	-1.2821	0.375961	-3.4102	0.000649158	0.00216987
THEM4	143.518	-1.28244	0.183505	-6.9886	2.77645e-12	2.37447e-11
AKR1D1	82.4479	-1.28274	0.23969	-5.35166	8.71527e-08	4.98452e-07
CGREF1	155.659	-1.2831	0.182951	-7.01336	2.32654e-12	2.00243e-11
CDK14	332.898	-1.28357	0.131447	-9.76495	1.59191e-22	2.62372e-21
ADPRH	28.4154	-1.28441	0.406362	-3.16076	0.00157357	0.00490881
TBC1D16	1311.76	-1.28451	0.0801286	-16.0306	7.80791e-58	5.08515e-56
RARG	50.2612	-1.28506	0.344287	-3.73253	0.000189568	0.000693365
TCTA	364.322	-1.28545	0.151687	-8.47439	2.36311e-17	2.84021e-16
OSBP2	407.768	-1.28598	0.125608	-10.238	1.33931e-24	2.46709e-23
ADAM23	957.488	-1.28605	0.0857833	-14.9918	8.30365e-51	4.54118e-49
CRELD2	166.583	-1.28623	0.174584	-7.36736	1.74036e-13	1.62651e-12
CLMP	544.432	-1.28668	0.110592	-11.6345	2.75053e-31	6.88687e-30
RASSF8	338.763	-1.28806	0.142508	-9.03848	1.58864e-19	2.20233e-18
REEP6	1192.49	-1.28841	0.0926049	-13.913	5.2799e-44	2.26877e-42
C1orf53	15.7259	-1.28851	0.558258	-2.3081	0.0209936	0.049913
HOXB3	17.5435	-1.28874	0.553988	-2.32631	0.0200023	0.0478497
WNT2B	25.2862	-1.2893	0.432053	-2.98411	0.002844	0.00840081
ENO3	35.0161	-1.28944	0.368349	-3.5006	0.000464216	0.00158957
ROR1	325.234	-1.29042	0.134616	-9.58593	9.16241e-22	1.42776e-20
CHMP6	108.721	-1.2907	0.215723	-5.98314	2.18875e-09	1.47552e-08
GYG2	603.265	-1.29127	0.100022	-12.91	3.95553e-38	1.39327e-36
SCLY	23.5754	-1.29224	0.438525	-2.94679	0.00321096	0.00938291
S100A1	44.9507	-1.29232	0.321704	-4.01712	5.89149e-05	0.00023313
ZCCHC24	64.5492	-1.29284	0.277883	-4.65248	3.27972e-06	1.54906e-05
SESN3	1450.78	-1.29354	0.109852	-11.7753	5.23272e-32	1.3797e-30
RMDN2	48.2282	-1.29432	0.331863	-3.90016	9.61279e-05	0.000368953
POLA2	67.0711	-1.295	0.270617	-4.78537	1.70674e-06	8.37973e-06
PRKG2	117.344	-1.29646	0.21078	-6.15078	7.71045e-10	5.38694e-09
AR	45.6036	-1.29714	0.318184	-4.07669	4.56818e-05	0.000184145
PRRT3	29.6947	-1.29748	0.389742	-3.32908	0.000871345	0.00284923
GNB3	25.8379	-1.29809	0.452129	-2.87107	0.00409085	0.0116706
ALDH3A1	28.5524	-1.29951	0.48495	-2.67967	0.00736941	0.0197312
UBTF	881.743	-1.29969	0.100712	-12.905	4.2157e-38	1.48263e-36
INTS3	1154.03	-1.30032	0.0826955	-15.7242	1.03187e-55	6.44497e-54
IRX3	128.221	-1.30038	0.23011	-5.65112	1.59404e-08	9.88597e-08
PZP	68.0188	-1.30176	0.294223	-4.42439	9.67139e-06	4.29214e-05
CELSR2	207.423	-1.3019	0.159107	-8.18254	2.77913e-16	3.13268e-15
CCDC71	144.837	-1.30209	0.193188	-6.74	1.58389e-11	1.26955e-10
LINC00514	37.5448	-1.30209	0.355662	-3.66104	0.000251192	0.00090117
PSKH1	678.078	-1.30215	0.106187	-12.2628	1.43404e-34	4.33625e-33
NAT1	99.3048	-1.30249	0.229482	-5.67578	1.38054e-08	8.61333e-08
ONECUT2	80.4253	-1.30279	0.250174	-5.20756	1.91339e-07	1.05602e-06
HYAL3	29.0269	-1.3033	0.39979	-3.25997	0.00111426	0.00357902
FZD2	65.5498	-1.30464	0.272345	-4.7904	1.66446e-06	8.18799e-06
ZNF786	88.4263	-1.3048	0.233096	-5.59771	2.17203e-08	1.3269e-07
MRPL24	326.52	-1.30573	0.131325	-9.9428	2.71107e-23	4.62501e-22
COL4A6	48.9833	-1.30589	0.314962	-4.14619	3.38048e-05	0.000139014
ZNF319	117.509	-1.30671	0.205703	-6.3524	2.11976e-10	1.56164e-09
FAM131B	84.9138	-1.30718	0.234828	-5.56653	2.59866e-08	1.57365e-07
FOXD2	88.1775	-1.3076	0.241872	-5.40615	6.43942e-08	3.74092e-07
SLC39A10	556.649	-1.30813	0.118868	-11.0049	3.61753e-28	7.84278e-27
TMEM169	20.0764	-1.30831	0.486931	-2.68685	0.00721295	0.0193576
DNAJC30	96.9681	-1.30871	0.221882	-5.89823	3.6741e-09	2.43167e-08
ZNF302	731.773	-1.30981	0.109215	-11.993	3.86495e-33	1.09755e-31
SEC31B	139.607	-1.31145	0.215848	-6.07581	1.23362e-09	8.5044e-09
ERBB3	6995.11	-1.3116	0.0626908	-20.9217	3.39745e-97	4.88463e-95
FXYD2	16.856	-1.31207	0.526884	-2.49024	0.0127656	0.0321885
SH2D2A	31.2613	-1.31221	0.429528	-3.055	0.00225062	0.00679914
IRF2BPL	195.765	-1.3126	0.196618	-6.67589	2.45745e-11	1.94519e-10
NEK1	101.52	-1.31552	0.221152	-5.94848	2.70646e-09	1.81117e-08
ATF6B	575.114	-1.31682	0.103906	-12.6732	8.32707e-37	2.79937e-35
ZNF239	115.96	-1.31703	0.20895	-6.30312	2.91714e-10	2.12676e-09
SLC19A1	154.887	-1.31735	0.181058	-7.27588	3.44177e-13	3.15093e-12
RDM1	71.1014	-1.31736	0.273657	-4.8139	1.48013e-06	7.3317e-06
SCN9A	97.3924	-1.31788	0.255069	-5.16675	2.38202e-07	1.29711e-06
SLC10A5	38.0783	-1.31836	0.366813	-3.59408	0.000325536	0.00114753
RBM45	139.479	-1.31978	0.192017	-6.87322	6.27677e-12	5.21202e-11
C11orf95	833.204	-1.32081	0.0938776	-14.0694	5.85338e-45	2.59822e-43
SI	2995.98	-1.32089	0.109038	-12.114	8.90284e-34	2.57619e-32
MPP6	463.298	-1.32247	0.113221	-11.6804	1.6053e-31	4.06392e-30
ANXA13	615.914	-1.3225	0.113934	-11.6077	3.76747e-31	9.36135e-30
EDN3	32.564	-1.32272	0.391206	-3.38113	0.00072189	0.00239339
SFTA2	17.7662	-1.32316	0.512102	-2.58378	0.0097723	0.0254204
ADM5	23.7734	-1.3243	0.457566	-2.89423	0.00380094	0.0109226
PROC	40.7793	-1.32454	0.342333	-3.86917	0.000109207	0.000414695
OSGEPL1	125.305	-1.32728	0.219644	-6.04285	1.51412e-09	1.036e-08
ANKRD29	72.3718	-1.32946	0.254166	-5.23067	1.68893e-07	9.36429e-07
TMEM150A	323.287	-1.32967	0.137145	-9.69533	3.15614e-22	5.08453e-21
ZNF611	166.036	-1.3302	0.184885	-7.19474	6.25821e-13	5.6125e-12
PIH1D2	24.1245	-1.33059	0.502112	-2.64998	0.00804959	0.0213597
SLC47A1	21.6768	-1.33067	0.462084	-2.87971	0.00398037	0.0113887
PRRG2	111.409	-1.33076	0.209162	-6.36234	1.98706e-10	1.46766e-09
TIGD6	93.9333	-1.33216	0.227729	-5.84977	4.92247e-09	3.21508e-08
GPR39	141.218	-1.33362	0.197132	-6.7651	1.33217e-11	1.07458e-10
PPP1R36	41.2464	-1.33387	0.338195	-3.9441	8.00995e-05	0.000310668
LRRC45	166.72	-1.33461	0.187792	-7.10683	1.18739e-12	1.03959e-11
SHBG	26.8273	-1.33575	0.424332	-3.1479	0.00164446	0.00511183
ARV1	151.512	-1.33703	0.186126	-7.18349	6.79532e-13	6.07989e-12
TMEM106A	117.095	-1.33903	0.217102	-6.16776	6.92661e-10	4.86459e-09
VARS1	560.849	-1.3423	0.121251	-11.0704	1.74696e-28	3.84364e-27
SLC38A11	86.185	-1.34292	0.282153	-4.75954	1.94039e-06	9.43975e-06
FGFR2	2507.56	-1.34339	0.0683313	-19.6599	4.75261e-86	5.6882e-84
MLN	62.1632	-1.34354	0.30793	-4.36312	1.28223e-05	5.60883e-05
XKR9	86.1961	-1.34439	0.247234	-5.43774	5.39609e-08	3.15566e-07
QTRT1	127.475	-1.34524	0.200411	-6.71243	1.91411e-11	1.52462e-10
USF3	477.846	-1.34749	0.124995	-10.7804	4.2622e-27	8.80958e-26
DIO1	388.203	-1.34848	0.127462	-10.5795	3.71019e-26	7.31164e-25
PLEKHA5	984.358	-1.34888	0.0929584	-14.5106	1.03766e-47	5.047e-46
LRMDA	74.0162	-1.34912	0.254861	-5.29357	1.19954e-07	6.74905e-07
CHRDL2	69.497	-1.34984	0.281765	-4.79066	1.6623e-06	8.1791e-06
ACVR1C	52.0886	-1.35042	0.314452	-4.29451	1.7508e-05	7.52459e-05
SULT1E1	262.934	-1.35086	0.165319	-8.17122	3.0529e-16	3.43283e-15
KDM8	47.287	-1.35089	0.338105	-3.99547	6.45664e-05	0.000254218
PPM1N	20.4679	-1.35151	0.4852	-2.78546	0.00534511	0.0148162
RFXAP	47.6888	-1.35421	0.327848	-4.1306	3.61812e-05	0.000148253
SCNN1D	28.3553	-1.35432	0.412365	-3.28428	0.00102242	0.00330541
HARBI1	70.9721	-1.35454	0.260352	-5.20272	1.96397e-07	1.08236e-06
HYAL2	276.994	-1.35631	0.144359	-9.39535	5.70304e-21	8.52659e-20
HDDC3	56.5215	-1.35809	0.30858	-4.40109	1.07709e-05	4.75151e-05
GATA4	24.082	-1.35834	0.443264	-3.06441	0.00218103	0.00661689
LOXL3	30.9114	-1.35917	0.401128	-3.38838	0.000703076	0.00233711
GBA	534.433	-1.36033	0.120474	-11.2915	1.44588e-29	3.33194e-28
ZNF311	71.173	-1.36034	0.279839	-4.86115	1.16704e-06	5.85182e-06
KSR2	16.3435	-1.36107	0.546341	-2.49124	0.0127299	0.0321091
SPHK2	682.188	-1.3625	0.112245	-12.1386	6.59355e-34	1.93242e-32
PPM1L	56.8132	-1.36386	0.317507	-4.29553	1.7428e-05	7.4916e-05
DISC1	54.1658	-1.36453	0.309028	-4.41555	1.00752e-05	4.46266e-05
PSAT1	326.023	-1.36483	0.143107	-9.53713	1.46833e-21	2.26187e-20
DGAT1	1754.41	-1.36505	0.0792514	-17.2244	1.74359e-66	1.38397e-64
ALG6	80.5381	-1.36573	0.280423	-4.87025	1.11458e-06	5.60083e-06
HSD17B8	185.945	-1.3658	0.177692	-7.68634	1.51408e-14	1.52274e-13
SYT16	15.8065	-1.36604	0.570198	-2.39573	0.0165873	0.0406286
RANBP17	146.081	-1.36665	0.189569	-7.20927	5.62533e-13	5.06479e-12
ACP2	453.207	-1.36706	0.118827	-11.5047	1.24924e-30	3.0316e-29
ZCWPW1	92.954	-1.36717	0.243628	-5.61171	2.00339e-08	1.22716e-07
KITLG	384.804	-1.3675	0.131397	-10.4074	2.29424e-25	4.36325e-24
PDZRN3	162.764	-1.36912	0.177598	-7.70907	1.26738e-14	1.2848e-13
TARBP1	719.068	-1.36996	0.116211	-11.7885	4.47232e-32	1.18467e-30
TSEN15	268.107	-1.36999	0.150431	-9.10711	8.46026e-20	1.18943e-18
IQCE	265.184	-1.37042	0.142113	-9.64321	5.25213e-22	8.33197e-21
PCCA	408.012	-1.37079	0.129631	-10.5745	3.91204e-26	7.68954e-25
KRCC1	150.758	-1.37084	0.184183	-7.44282	9.85619e-14	9.36461e-13
MAMDC4	74.781	-1.37186	0.262545	-5.22523	1.73937e-07	9.63229e-07
FUT2	267.437	-1.37269	0.143237	-9.58334	9.39568e-22	1.46212e-20
CCDC102A	51.6042	-1.37273	0.306913	-4.47269	7.72415e-06	3.47313e-05
C5	446.242	-1.37414	0.122338	-11.2324	2.82849e-29	6.44659e-28
ARHGAP4	151.359	-1.3742	0.201416	-6.82269	8.93514e-12	7.3263e-11
CCDC40	18.5772	-1.37448	0.517219	-2.65743	0.00787383	0.0209419
SLC7A9	36.0806	-1.37555	0.419083	-3.28228	0.00102972	0.00332758
MFSD4A	22.1593	-1.37607	0.463383	-2.96962	0.00298171	0.0087668
DCBLD2	693.243	-1.37748	0.10195	-13.5113	1.3411e-41	5.31327e-40
TSPOAP1	56.9552	-1.37989	0.302607	-4.56003	5.11468e-06	2.34768e-05
MIF4GD	128.078	-1.38054	0.212728	-6.48968	8.60167e-11	6.54139e-10
UGT2B7	105.312	-1.38107	0.241629	-5.71567	1.09271e-08	6.89655e-08
TMEM42	158.419	-1.38254	0.178318	-7.75322	8.95904e-15	9.19918e-14
PRKCA	770.119	-1.38258	0.0973371	-14.2041	8.64162e-46	3.96682e-44
CNTLN	54.6483	-1.3833	0.295245	-4.68525	2.79613e-06	1.33277e-05
TMEM86B	102.495	-1.38462	0.217247	-6.37346	1.84814e-10	1.36903e-09
ZNRF3	370.802	-1.3858	0.14597	-9.49374	2.2289e-21	3.38781e-20
TOMM40L	202.582	-1.38746	0.165182	-8.3996	4.4799e-17	5.28434e-16
RAPGEFL1	669.104	-1.39005	0.102615	-13.5462	8.34341e-42	3.31705e-40
SLC27A5	51.2651	-1.39019	0.318905	-4.35927	1.30498e-05	5.70397e-05
DDX28	205.847	-1.39058	0.161606	-8.60473	7.64936e-18	9.5242e-17
TMEM185B	844.754	-1.39205	0.0911777	-15.2674	1.261e-52	7.17075e-51
ATP2C2	80.7329	-1.39239	0.245916	-5.66207	1.49561e-08	9.30582e-08
ZNF318	495.177	-1.39281	0.1107	-12.5818	2.65852e-36	8.70684e-35
DGAT2	2955.21	-1.39297	0.0644434	-21.6154	1.28672e-103	1.98745e-101
BCAT1	785.478	-1.393	0.118792	-11.7263	9.34101e-32	2.40739e-30
NPR1	78.3746	-1.39349	0.259899	-5.36167	8.24578e-08	4.72783e-07
ZNF253	141.929	-1.39357	0.192053	-7.25619	3.98147e-13	3.62326e-12
CTNS	154.267	-1.39381	0.184549	-7.5525	4.26997e-14	4.17501e-13
LRRC56	47.3934	-1.39563	0.31387	-4.44653	8.7269e-06	3.89642e-05
ADGRG1	2131.17	-1.39682	0.0836436	-16.6996	1.31914e-62	9.66523e-61
ABCC10	322.146	-1.3982	0.132861	-10.5237	6.71643e-26	1.30227e-24
PCED1B	33.7353	-1.39846	0.388855	-3.59634	0.000322723	0.00113814
DNPH1	345.427	-1.39989	0.135498	-10.3315	5.07774e-25	9.53013e-24
KNG1	2296.2	-1.3999	0.0738164	-18.9647	3.34013e-80	3.61874e-78
TFF2	144.038	-1.40104	0.196531	-7.12886	1.01204e-12	8.9394e-12
CAPS	24.7951	-1.40113	0.451059	-3.10631	0.00189439	0.00582068
COL26A1	260.464	-1.40151	0.148479	-9.43913	3.75872e-21	5.64921e-20
ZBTB42	128.829	-1.40155	0.20831	-6.7282	1.7178e-11	1.37304e-10
SUSD4	204.363	-1.40228	0.158914	-8.82416	1.10283e-18	1.44722e-17
FRAS1	4492.15	-1.40929	0.077408	-18.2059	4.63152e-74	4.32149e-72
MRPL12	75.1584	-1.41095	0.266132	-5.30171	1.1472e-07	6.47051e-07
SEMA3A	457.244	-1.41103	0.12006	-11.7527	6.83874e-32	1.78872e-30
TRABD2B	16.8626	-1.41146	0.525803	-2.68438	0.00726641	0.0194896
NUDT6	34.3744	-1.41287	0.387965	-3.64175	0.00027079	0.000966624
CBS	16.4682	-1.41307	0.528124	-2.67565	0.0074585	0.0199417
RGN	539.421	-1.41396	0.117061	-12.0789	1.36555e-33	3.93154e-32
CHST12	253.11	-1.41583	0.15399	-9.19429	3.77465e-20	5.38967e-19
ABCC6	621.342	-1.41685	0.107249	-13.2108	7.59722e-40	2.81936e-38
ACY3	23.3304	-1.4174	0.447985	-3.16394	0.00155649	0.00486349
IRS1	1164.86	-1.42032	0.0854851	-16.6148	5.44619e-62	3.93987e-60
SOAT2	403.293	-1.42048	0.127347	-11.1544	6.81484e-29	1.52733e-27
MRC2	69.2122	-1.42106	0.279526	-5.0838	3.69954e-07	1.97025e-06
PEX11G	32.0845	-1.4223	0.379444	-3.74839	0.000177972	0.000653669
LCMT2	106.841	-1.42248	0.217551	-6.53863	6.20859e-11	4.7707e-10
SLC38A5	16.6091	-1.42261	0.592394	-2.40146	0.0163298	0.0400235
NEK8	137.626	-1.42359	0.209179	-6.80563	1.00606e-11	8.21962e-11
PLCB4	41.9602	-1.42434	0.3466	-4.10945	3.96602e-05	0.000161495
TNS2	20.7025	-1.42451	0.495822	-2.87302	0.00406564	0.0116074
ACAD10	633.789	-1.42513	0.106213	-13.4176	4.76938e-41	1.83549e-39
KHK	49.0705	-1.42646	0.317846	-4.4879	7.19285e-06	3.24444e-05
SPIRE2	403.857	-1.42812	0.132561	-10.7732	4.60476e-27	9.49187e-26
CTXND1	120.174	-1.42814	0.215963	-6.61292	3.7682e-11	2.946e-10
SOX5	153.543	-1.42949	0.187182	-7.63691	2.22498e-14	2.20664e-13
SIGMAR1	1177.48	-1.43169	0.103887	-13.7813	3.30416e-43	1.39021e-41
FBP1	33.2311	-1.43201	0.384304	-3.72624	0.000194358	0.000709977
KLHDC9	12.9854	-1.43273	0.61533	-2.32839	0.0198914	0.0476095
ARL15	955.463	-1.4343	0.107512	-13.3407	1.34112e-40	5.08424e-39
BEND3	118.161	-1.43497	0.209838	-6.83847	8.00409e-12	6.58652e-11
GPRASP2	52.0478	-1.43555	0.307828	-4.6635	3.10878e-06	1.47258e-05
AP002990.1	38.6309	-1.43602	0.357737	-4.01419	5.96512e-05	0.000235963
BNIPL	18.8908	-1.43699	0.538301	-2.66949	0.00759664	0.0202684
TMEM250	282.221	-1.43785	0.141778	-10.1416	3.61214e-24	6.49673e-23
TBCK	434.726	-1.43872	0.119991	-11.9902	3.99789e-33	1.13249e-31
RCBTB1	288.098	-1.43888	0.153987	-9.34419	9.25925e-21	1.36295e-19
ARHGEF17	1712.43	-1.43975	0.0931261	-15.4602	6.43654e-54	3.8218e-52
HMGCS2	2038.56	-1.44146	0.0810498	-17.7849	9.25788e-71	8.17124e-69
DPYD	28.1344	-1.44147	0.419161	-3.43893	0.000584012	0.00196823
SLC22A11	28.6093	-1.44171	0.416708	-3.45976	0.000540661	0.00183267
IL1R1	431.288	-1.44228	0.126019	-11.4449	2.49336e-30	5.9497e-29
CSF3R	17.6505	-1.44378	0.540485	-2.67128	0.00755636	0.0201743
AGFG2	511.581	-1.44429	0.109112	-13.2368	5.38181e-40	2.02349e-38
MR1	188.095	-1.44745	0.182574	-7.92802	2.22674e-15	2.37422e-14
ADORA2A	34.9935	-1.44763	0.403039	-3.59179	0.00032842	0.00115734
RDH5	76.7706	-1.44795	0.256916	-5.6359	1.7415e-08	1.07451e-07
FNDC10	42.8207	-1.44851	0.361257	-4.00965	6.08089e-05	0.000240292
LRRC29	23.855	-1.45	0.468696	-3.09369	0.00197683	0.006052
FAM241A	61.6397	-1.45047	0.287523	-5.04471	4.54206e-07	2.38913e-06
RBM15B	741.403	-1.45196	0.10004	-14.5138	9.9134e-48	4.84231e-46
FOXQ1	389.493	-1.45315	0.151384	-9.59907	8.06684e-22	1.2622e-20
AMIGO2	160.802	-1.45368	0.204561	-7.10634	1.19158e-12	1.04286e-11
SWSAP1	26.3868	-1.45544	0.433661	-3.35618	0.000790285	0.00260571
CLYBL	62.1083	-1.45653	0.291271	-5.00059	5.71551e-07	2.97217e-06
BMP8B	325.753	-1.45726	0.135523	-10.7528	5.74601e-27	1.17542e-25
NCDN	106.695	-1.45796	0.230099	-6.33622	2.35471e-10	1.72583e-09
SLC25A21	21.174	-1.45852	0.474482	-3.07391	0.00211273	0.00642663
TLCD2	190.504	-1.45866	0.170239	-8.56833	1.05e-17	1.29257e-16
CYB5D2	88.5747	-1.45991	0.273503	-5.33783	9.40631e-08	5.35429e-07
TSPAN10	23.4752	-1.46046	0.460133	-3.17399	0.00150358	0.00471105
PBX3	48.9741	-1.46162	0.315931	-4.62639	3.72087e-06	1.74301e-05
XPNPEP2	144.804	-1.46242	0.192358	-7.6026	2.90246e-14	2.86486e-13
EME2	145.653	-1.46285	0.195384	-7.48706	7.04328e-14	6.76794e-13
SYNE1	516.64	-1.46286	0.11462	-12.7627	2.64834e-37	9.1039e-36
LAMA1	641.707	-1.46305	0.108517	-13.4822	1.99153e-41	7.79561e-40
IGDCC4	97.2627	-1.46415	0.222433	-6.58243	4.62806e-11	3.59244e-10
TMEM170B	82.677	-1.4674	0.263057	-5.57825	2.42956e-08	1.47791e-07
ENPEP	28.7754	-1.46941	0.408142	-3.60024	0.000317923	0.00112191
LCT	91.2117	-1.47119	0.235992	-6.23406	4.54501e-10	3.24989e-09
ATF7IP2	241.085	-1.47144	0.155638	-9.45426	3.25314e-21	4.90222e-20
BORCS8	113.677	-1.47199	0.213456	-6.89602	5.34812e-12	4.47504e-11
BEST1	35.588	-1.47208	0.371506	-3.96247	7.41774e-05	0.000288924
NDP	28.1669	-1.475	0.423733	-3.48097	0.000499605	0.00170259
RBBP8NL	288.45	-1.47609	0.145625	-10.1363	3.8129e-24	6.84704e-23
LRFN3	68.2595	-1.47613	0.273517	-5.39687	6.7812e-08	3.9265e-07
TLX2	15.811	-1.47785	0.560436	-2.63696	0.00836534	0.0221179
PAK6	128.946	-1.47785	0.204519	-7.22599	4.97471e-13	4.49138e-12
ZNF480	346.006	-1.47848	0.158961	-9.3009	1.39256e-20	2.03152e-19
TTN	788.76	-1.48049	0.116817	-12.6735	8.289e-37	2.79067e-35
GSAP	508.756	-1.48088	0.110346	-13.4203	4.59762e-41	1.77536e-39
FO681492.1	16.6733	-1.48114	0.544771	-2.71883	0.00655128	0.0177671
DACT2	139.19	-1.48123	0.189516	-7.81589	5.45754e-15	5.69418e-14
PHYKPL	725.733	-1.48147	0.109756	-13.4978	1.61089e-41	6.34911e-40
NR2F2	1614.43	-1.48159	0.0805108	-18.4024	1.25785e-75	1.20311e-73
ELOVL3	22.5787	-1.48231	0.471498	-3.14383	0.00166751	0.00517504
CCR1	75.6432	-1.4838	0.255052	-5.81762	5.96914e-09	3.86666e-08
SOWAHB	109.81	-1.48491	0.213178	-6.9656	3.27015e-12	2.78005e-11
TSHZ1	59.6385	-1.48706	0.297939	-4.99115	6.00193e-07	3.11262e-06
ZNF300	142.72	-1.4901	0.196361	-7.58857	3.2346e-14	3.18171e-13
TRPV3	102.027	-1.4922	0.232852	-6.40839	1.47066e-10	1.10119e-09
TMEM17	34.4221	-1.49335	0.373829	-3.99475	6.47634e-05	0.000254949
RABL2B	89.4402	-1.49488	0.243876	-6.12969	8.80502e-10	6.13106e-09
TCF7	208.798	-1.49539	0.17328	-8.62991	6.14013e-18	7.69535e-17
FREM1	42.6205	-1.49713	0.358511	-4.17598	2.96711e-05	0.000123414
ADCY1	371.98	-1.49944	0.137321	-10.9192	9.32888e-28	1.9838e-26
ZNF268	396.897	-1.49948	0.141524	-10.5952	3.13535e-26	6.18947e-25
TTBK1	35.8284	-1.50016	0.384691	-3.89964	9.63343e-05	0.000369621
FGG	7885.98	-1.50037	0.0722086	-20.7783	6.80423e-96	9.48443e-94
RAMP1	14.4318	-1.50155	0.582782	-2.57652	0.00997997	0.0258939
COLCA2	83.6504	-1.50345	0.250805	-5.99451	2.04102e-09	1.38164e-08
EML1	168.979	-1.50495	0.185307	-8.12141	4.60794e-16	5.13591e-15
SLC26A8	17.1927	-1.5057	0.519795	-2.89671	0.00377101	0.0108502
ARIH2OS	15.8268	-1.50583	0.543531	-2.77046	0.00559771	0.0154452
RASL10B	46.9878	-1.50796	0.325232	-4.63656	3.54263e-06	1.66601e-05
PSPH	601.636	-1.5087	0.103794	-14.5355	7.21325e-48	3.54613e-46
WDR81	392.861	-1.50943	0.125924	-11.9869	4.16175e-33	1.17599e-31
SKIDA1	70.4669	-1.51098	0.269588	-5.60477	2.08534e-08	1.27531e-07
VWA2	35.5923	-1.51438	0.374262	-4.04633	5.20275e-05	0.000207855
METAP1D	178.086	-1.51446	0.175069	-8.65068	5.11932e-18	6.4478e-17
MAT1A	433.362	-1.51476	0.118696	-12.7617	2.68206e-37	9.20598e-36
SHISA6	32.0602	-1.51672	0.42606	-3.55986	0.000371053	0.00129421
NLRX1	66.9805	-1.5184	0.280705	-5.40922	6.32983e-08	3.68099e-07
LEF1	61.724	-1.51868	0.295994	-5.13078	2.88539e-07	1.55713e-06
TMEM132A	278.638	-1.51943	0.148369	-10.2409	1.30064e-24	2.39779e-23
CCT6B	26.3885	-1.51968	0.479948	-3.16634	0.0015437	0.00482881
NABP1	731.377	-1.52215	0.111546	-13.6459	2.13677e-42	8.67611e-41
INTS5	233.362	-1.52233	0.157254	-9.68067	3.64331e-22	5.85285e-21
ZFP69	27.1922	-1.5228	0.462723	-3.29096	0.000998463	0.00323253
PEG10	24964.1	-1.52282	0.0556165	-27.3808	4.64931e-165	1.58632e-162
HOXA3	127.623	-1.52301	0.21245	-7.1688	7.56607e-13	6.75362e-12
HOXC12	170.224	-1.52447	0.19617	-7.77115	7.77739e-15	8.005e-14
ULBP1	24.2555	-1.52571	0.444512	-3.43232	0.000598443	0.00201271
MTG1	104.735	-1.52678	0.232172	-6.57606	4.83081e-11	3.7422e-10
GABRA3	23.929	-1.52735	0.461728	-3.30789	0.000940006	0.00305582
ARPIN	536.167	-1.52751	0.10782	-14.1672	1.46303e-45	6.60056e-44
DGKK	20.1631	-1.5292	0.518908	-2.94695	0.00320922	0.00937904
PKLR	38.4273	-1.53201	0.362877	-4.22185	2.42302e-05	0.00010197
C1QTNF3	26.9837	-1.53245	0.418789	-3.65924	0.000252969	0.000906973
SCFD2	86.7984	-1.53502	0.236783	-6.48281	9.00276e-11	6.83504e-10
AMDHD2	181.808	-1.53575	0.169363	-9.06778	1.21467e-19	1.6921e-18
ASPM	514.961	-1.53852	0.151804	-10.1349	3.86722e-24	6.9337e-23
EMID1	130.418	-1.53916	0.200379	-7.68124	1.57552e-14	1.58105e-13
CACNA1F	15.9324	-1.54233	0.634841	-2.42947	0.0151207	0.037405
DARS2	800.26	-1.54248	0.0976461	-15.7966	3.28356e-56	2.07928e-54
ADGRF3	36.4887	-1.5436	0.394406	-3.91374	9.0878e-05	0.000350391
TMEM143	178.161	-1.54494	0.174389	-8.85915	8.06278e-19	1.06726e-17
CCDC78	35.1044	-1.55046	0.377837	-4.1035	4.06938e-05	0.000165439
RPS6KA3	4454.5	-1.55072	0.088158	-17.5902	2.9288e-69	2.47056e-67
KLB	985.809	-1.5509	0.0963173	-16.102	2.47146e-58	1.64237e-56
ZNF117	79.2157	-1.55152	0.25459	-6.09418	1.10001e-09	7.60621e-09
ODAM	24.7348	-1.55233	0.457182	-3.39542	0.000685232	0.00228211
TYSND1	409.987	-1.55353	0.142356	-10.913	9.99377e-28	2.11339e-26
BCAS1	639.05	-1.55469	0.113442	-13.7047	9.51021e-43	3.90311e-41
MOCOS	117.723	-1.55613	0.221378	-7.02929	2.0759e-12	1.79278e-11
ORM2	410.303	-1.55757	0.130291	-11.9545	6.14756e-33	1.72645e-31
ZFP41	86.7728	-1.5591	0.242008	-6.44233	1.17652e-10	8.87633e-10
SERPINA10	697.928	-1.55947	0.104144	-14.9742	1.0828e-50	5.87951e-49
WNT5A	41.3273	-1.5616	0.374799	-4.1665	3.09307e-05	0.000128233
CASTOR3	141.786	-1.562	0.196203	-7.96114	1.70456e-15	1.83199e-14
MTERF2	190.689	-1.56259	0.184408	-8.47351	2.38106e-17	2.85877e-16
EML6	486.67	-1.5629	0.123133	-12.6928	6.47872e-37	2.18442e-35
RNF32	77.8086	-1.56343	0.270884	-5.77158	7.853e-09	5.02293e-08
OPLAH	195.767	-1.56351	0.17421	-8.97485	2.83736e-19	3.87236e-18
POFUT1	3544.15	-1.56417	0.0712108	-21.9653	6.18083e-107	1.03893e-104
SERPINA11	63.1139	-1.56427	0.28536	-5.48173	4.21177e-08	2.49239e-07
SPA17	16.1048	-1.56448	0.582639	-2.68515	0.00724968	0.0194539
AMH	15.2747	-1.56449	0.570172	-2.74389	0.00607157	0.0166064
FGA	2528.59	-1.56586	0.0768556	-20.3741	2.84138e-92	3.7764e-90
BSN	71.7504	-1.56593	0.26617	-5.88318	4.02446e-09	2.65433e-08
MYCN	196.369	-1.56724	0.178389	-8.78552	1.55644e-18	2.01702e-17
CPAMD8	18.7734	-1.56791	0.562656	-2.78662	0.0053261	0.0147725
IGFL4	20.9036	-1.56818	0.486529	-3.2232	0.00126765	0.00403207
KCNK15	23.4455	-1.56888	0.46899	-3.34522	0.000822163	0.00270077
ENOSF1	1151.45	-1.57019	0.0959169	-16.3703	3.11526e-60	2.16459e-58
IRF2BP1	166.807	-1.57053	0.191457	-8.20302	2.34417e-16	2.6634e-15
SMIM10L2B	28.245	-1.57306	0.418244	-3.76109	0.000169171	0.000623048
COL2A1	1290.29	-1.5766	0.105202	-14.9864	9.01726e-51	4.90797e-49
ARAP3	216.334	-1.57673	0.159579	-9.88056	5.05502e-23	8.49689e-22
C8orf82	123.066	-1.57747	0.212153	-7.43556	1.04126e-13	9.88914e-13
C2orf72	3838.13	-1.57793	0.0646561	-24.405	1.51308e-131	3.42465e-129
MCMDC2	63.5222	-1.57852	0.293043	-5.38664	7.17874e-08	4.14514e-07
ABCD1	47.0942	-1.58158	0.326513	-4.84385	1.27345e-06	6.35564e-06
HS3ST1	24.7466	-1.58182	0.441528	-3.5826	0.000340194	0.00119515
FOXA1	1689.37	-1.58523	0.0794756	-19.9461	1.62029e-88	1.98074e-86
SYP	78.329	-1.58741	0.260319	-6.09793	1.0745e-09	7.44336e-09
PRUNE2	63.9491	-1.58749	0.280807	-5.6533	1.57392e-08	9.7665e-08
SLC2A2	60.4529	-1.58819	0.294654	-5.39002	7.04506e-08	4.07103e-07
TM4SF20	443.171	-1.59177	0.118762	-13.4031	5.80049e-41	2.21368e-39
CHST14	70.4196	-1.59246	0.26322	-6.04991	1.44924e-09	9.93989e-09
AKAP3	32.4265	-1.59331	0.391747	-4.0672	4.75821e-05	0.000191265
OLR1	379.974	-1.59372	0.136149	-11.7057	1.19156e-31	3.05372e-30
CSGALNACT1	39.7003	-1.5973	0.368148	-4.33875	1.43293e-05	6.23465e-05
SALL2	83.5204	-1.59829	0.241618	-6.61497	3.71625e-11	2.90937e-10
TRPC6	13.4827	-1.59895	0.631478	-2.53207	0.0113392	0.0290111
RAB37	912.958	-1.59902	0.0886516	-18.0371	9.96408e-73	9.03885e-71
CENPB	445.292	-1.60052	0.137736	-11.6202	3.2554e-31	8.11544e-30
BCL2L10	42.1259	-1.60071	0.346902	-4.61429	3.94437e-06	1.84055e-05
TCF4	218.483	-1.60083	0.159803	-10.0175	1.27662e-23	2.22604e-22
STX1B	10.5063	-1.601	0.679368	-2.3566	0.0184433	0.0446011
DRICH1	21.0676	-1.60281	0.511566	-3.13315	0.00172943	0.00534833
PLA2R1	58.0547	-1.60452	0.288143	-5.56848	2.56976e-08	1.55739e-07
CCDC142	244.42	-1.6056	0.150446	-10.6723	1.3726e-26	2.77187e-25
ADAT1	249.922	-1.60617	0.161255	-9.96042	2.27097e-23	3.90549e-22
PRKACB	18.6594	-1.6067	0.507899	-3.16343	0.00155923	0.00487074
AADAC	146.023	-1.6073	0.193064	-8.32519	8.41907e-17	9.77946e-16
STXBP5	335.908	-1.60809	0.132905	-12.0996	1.06169e-33	3.06442e-32
SLC16A7	43.1014	-1.60844	0.334783	-4.80442	1.55199e-06	7.65941e-06
ABCC3	4522.25	-1.61129	0.066342	-24.2876	2.65013e-130	5.71529e-128
PROCA1	52.2069	-1.61296	0.311607	-5.17628	2.2636e-07	1.23735e-06
TASOR	819.847	-1.61427	0.092822	-17.3911	9.64259e-68	7.95775e-66
RHBG	183.42	-1.6152	0.169041	-9.55505	1.2352e-21	1.91176e-20
ERP27	53.2817	-1.61789	0.325282	-4.9738	6.56528e-07	3.37947e-06
SERPINA6	397.537	-1.618	0.130019	-12.4443	1.50191e-35	4.74878e-34
EPSTI1	171.724	-1.61853	0.178886	-9.04783	1.45836e-19	2.0254e-18
SOWAHA	159.456	-1.61993	0.184695	-8.77083	1.77353e-18	2.29055e-17
JMJD4	76.1077	-1.62176	0.261007	-6.21346	5.18314e-10	3.68887e-09
HGH1	164.53	-1.62203	0.181092	-8.95698	3.33705e-19	4.53268e-18
CD96	13.9039	-1.6233	0.609696	-2.66248	0.00775669	0.0206536
DNAH11	43.2075	-1.62433	0.353577	-4.59399	4.34845e-06	2.01716e-05
TRIM17	36.7557	-1.62579	0.370147	-4.39227	1.12173e-05	4.93606e-05
HEXD	235.75	-1.62637	0.163976	-9.91839	3.46311e-23	5.87289e-22
NKPD1	16.1554	-1.62686	0.581336	-2.79848	0.00513437	0.0142962
ADAM22	750.229	-1.62746	0.0978621	-16.6302	4.21433e-62	3.06814e-60
ZMYND15	44.7556	-1.62988	0.412468	-3.95154	7.76487e-05	0.000301776
CCDC121	48.8582	-1.63013	0.332285	-4.90583	9.3034e-07	4.7167e-06
PCDHGA1	36.4341	-1.63169	0.388348	-4.20163	2.64996e-05	0.000110969
SLC2A6	29.1452	-1.63203	0.431249	-3.78444	0.000154057	0.000570876
UGT2B10	84.8787	-1.63419	0.254859	-6.41214	1.43488e-10	1.0751e-09
RND2	11.3184	-1.63664	0.655361	-2.49731	0.0125139	0.0316446
FSCN2	11.4655	-1.63766	0.659557	-2.48298	0.013029	0.0327804
NRXN3	94.6149	-1.63793	0.23777	-6.8887	5.63058e-12	4.70106e-11
SULT1B1	177.546	-1.63809	0.175252	-9.34704	9.01324e-21	1.32931e-19
TMEM129	315.679	-1.63993	0.140856	-11.6426	2.50196e-31	6.27137e-30
CYP2C19	108.943	-1.63997	0.241913	-6.77918	1.2086e-11	9.80081e-11
SLC29A4	540.332	-1.64312	0.121781	-13.4924	1.73347e-41	6.80879e-40
LRRC9	35.6302	-1.64343	0.381312	-4.30995	1.63291e-05	7.04572e-05
ULK2	81.7236	-1.64499	0.26528	-6.20097	5.61168e-10	3.97777e-09
BDH2	407.484	-1.64693	0.122803	-13.4111	5.20581e-41	1.99005e-39
METTL7A	93.6644	-1.64827	0.23941	-6.88471	5.79042e-12	4.83099e-11
KLHDC1	10.4855	-1.65008	0.66529	-2.48024	0.0131293	0.0330074
CYP7A1	34.4355	-1.65099	0.461253	-3.57937	0.000344426	0.00120927
PLEKHG2	451.527	-1.65153	0.116143	-14.2198	6.90082e-46	3.18693e-44
SLCO1A2	41.948	-1.65307	0.368114	-4.49065	7.10065e-06	3.20602e-05
CUL9	276.926	-1.65308	0.143565	-11.5145	1.11538e-30	2.71251e-29
CTSK	45.0275	-1.65478	0.332546	-4.97609	6.48804e-07	3.34122e-06
ART4	10.9683	-1.65659	0.666678	-2.48484	0.0129609	0.0326235
MECOM	647.797	-1.65896	0.106572	-15.5666	1.22781e-54	7.52485e-53
ZNF780B	381.448	-1.65902	0.130035	-12.7583	2.80337e-37	9.60796e-36
HSPA1L	37.4638	-1.66083	0.360934	-4.60149	4.19474e-06	1.94947e-05
B9D1	138.575	-1.66156	0.194517	-8.54199	1.31926e-17	1.61101e-16
TIGD5	46.319	-1.66164	0.329083	-5.0493	4.43435e-07	2.33623e-06
LIPT2	97.621	-1.66326	0.238054	-6.98688	2.81076e-12	2.40292e-11
LTB4R	52.4278	-1.66403	0.3228	-5.155	2.53632e-07	1.37786e-06
PLEKHG4B	99.2591	-1.66631	0.234413	-7.10843	1.17368e-12	1.02838e-11
NHS	94.7601	-1.66677	0.244695	-6.81161	9.65124e-12	7.90496e-11
HSPA12B	27.7259	-1.66975	0.426592	-3.91417	9.07163e-05	0.000349827
FSIP2	25.7511	-1.6703	0.439688	-3.79882	0.000145386	0.000540761
HP	67.6187	-1.67265	0.284695	-5.87524	4.22242e-09	2.77689e-08
PXMP2	65.7632	-1.67273	0.27446	-6.09464	1.09687e-09	7.5891e-09
SLX4	135.531	-1.67403	0.195745	-8.55211	1.20864e-17	1.48068e-16
SPTSSB	741.416	-1.67592	0.107697	-15.5615	1.32874e-54	8.10001e-53
CTTNBP2	43.6498	-1.67754	0.352674	-4.75663	1.96853e-06	9.56646e-06
DOLK	237.324	-1.67833	0.166282	-10.0932	5.91939e-24	1.04897e-22
TRAPPC6A	346.584	-1.67857	0.137502	-12.2076	2.83077e-34	8.44795e-33
TRAF1	32.2795	-1.67866	0.43371	-3.87046	0.00010863	0.000412848
GLYAT	9.24589	-1.68137	0.726303	-2.31497	0.0206143	0.0491096
KIF12	1044.97	-1.68528	0.0940839	-17.9125	9.41232e-72	8.47108e-70
ADGRL3	28.5045	-1.68665	0.427172	-3.9484	7.86749e-05	0.000305453
CFAP70	18.8324	-1.68842	0.551743	-3.06016	0.00221222	0.00670175
SHC3	16.1284	-1.68847	0.615116	-2.74497	0.00605173	0.01656
ATP8B4	10.577	-1.68903	0.666485	-2.53424	0.0112691	0.0288543
GLYATL1	103.29	-1.68945	0.229961	-7.34666	2.03224e-13	1.88926e-12
MOCS1	393.637	-1.68976	0.120601	-14.0111	1.33243e-44	5.86886e-43
SCRN2	1320.93	-1.68992	0.0973784	-17.3542	1.83486e-67	1.50341e-65
USP51	59.109	-1.69123	0.293095	-5.77024	7.91588e-09	5.05608e-08
JAKMIP2	10.7632	-1.69145	0.710426	-2.38089	0.0172709	0.0420998
HOXB13	41.7808	-1.69147	0.350356	-4.82785	1.38015e-06	6.86021e-06
CHAC2	13.5068	-1.69285	0.657628	-2.57417	0.0100481	0.026046
DPYSL3	313.453	-1.69297	0.148011	-11.4382	2.69516e-30	6.42455e-29
ACOX2	92.9283	-1.69512	0.273077	-6.20748	5.38405e-10	3.82472e-09
ARSI	12.4058	-1.69514	0.627256	-2.70247	0.00688272	0.0185738
LAMP3	25.8458	-1.69531	0.434931	-3.89788	9.70372e-05	0.000372006
CFAP157	12.1246	-1.69542	0.653058	-2.59612	0.00942828	0.0246349
IDNK	41.0274	-1.69711	0.374574	-4.53076	5.87706e-06	2.67789e-05
ZNF554	55.6267	-1.69767	0.318521	-5.32984	9.83016e-08	5.57888e-07
PLA2G4E	44.9524	-1.69826	0.334245	-5.0809	3.75648e-07	1.99937e-06
RGS17	24.3743	-1.69828	0.475743	-3.56974	0.000357333	0.00124979
TLR5	36.9136	-1.69909	0.368095	-4.61592	3.91367e-06	1.82696e-05
PCK2	836.218	-1.70352	0.109734	-15.5241	2.38442e-54	1.43245e-52
OLFML3	281.532	-1.70449	0.15004	-11.3603	6.59216e-30	1.53772e-28
PPOX	127.512	-1.70563	0.235612	-7.23916	4.51472e-13	4.08901e-12
EHHADH	487.403	-1.70869	0.119732	-14.2709	3.32326e-46	1.54097e-44
ORM1	542.581	-1.71069	0.116529	-14.6804	8.60339e-49	4.33202e-47
ACADM	471.412	-1.71214	0.125762	-13.6141	3.30091e-42	1.3285e-40
THTPA	39.1588	-1.71341	0.353738	-4.84374	1.2742e-06	6.35708e-06
SLC43A1	848.475	-1.71985	0.0975258	-17.6348	1.33192e-69	1.13611e-67
COL4A5	501.23	-1.72097	0.11622	-14.8079	1.30203e-49	6.79551e-48
IFT27	198.461	-1.72135	0.173209	-9.93797	2.84573e-23	4.8475e-22
MINPP1	438.265	-1.72211	0.139364	-12.3569	4.46843e-35	1.38977e-33
MST1R	229.415	-1.72538	0.166107	-10.3872	2.83608e-25	5.38032e-24
KLHL13	737.223	-1.72668	0.103273	-16.7196	9.42983e-63	6.97624e-61
LTB4R2	14.1657	-1.72792	0.591902	-2.91926	0.00350862	0.0101567
BFSP1	76.4881	-1.73188	0.262098	-6.60775	3.90216e-11	3.04449e-10
FDXACB1	30.1991	-1.7326	0.406441	-4.26287	2.0182e-05	8.60428e-05
STOML1	49.481	-1.73396	0.315529	-5.49539	3.89844e-08	2.31356e-07
ALPK3	15.5041	-1.73439	0.647004	-2.68065	0.00734789	0.0196828
ARHGEF39	156.353	-1.73615	0.185763	-9.34606	9.09737e-21	1.33999e-19
ADGRG7	99.5788	-1.73747	0.25933	-6.69987	2.0861e-11	1.65757e-10
PLEKHB1	82.4872	-1.74202	0.255156	-6.82729	8.65325e-12	7.10536e-11
LACTB2	567.862	-1.74559	0.115518	-15.111	1.36995e-51	7.65698e-50
THBS3	67.7753	-1.75164	0.283372	-6.1814	6.35354e-10	4.47725e-09
SPTLC3	2089.9	-1.75635	0.0868291	-20.2277	5.58899e-91	7.05881e-89
GABRB1	35.4287	-1.7579	0.382541	-4.59532	4.32093e-06	2.0048e-05
ROS1	14.5581	-1.75863	0.620636	-2.83359	0.00460277	0.0129676
MAP3K10	47.1377	-1.7591	0.352339	-4.99262	5.95642e-07	3.09042e-06
LRRC31	48.1971	-1.76143	0.338702	-5.20053	1.98721e-07	1.09366e-06
COLGALT2	132.699	-1.76345	0.217816	-8.09604	5.67779e-16	6.27328e-15
PIEZO2	9.12887	-1.76637	0.763004	-2.31502	0.0206116	0.0491096
LIG4	146.638	-1.76799	0.205214	-8.61536	6.97197e-18	8.70449e-17
HPS6	140.532	-1.76915	0.198797	-8.89928	5.62093e-19	7.5275e-18
HHIPL1	39.9252	-1.7704	0.361019	-4.90389	9.3955e-07	4.75916e-06
IGDCC3	256.957	-1.77239	0.166265	-10.66	1.56625e-26	3.15457e-25
CPB2	18.426	-1.77353	0.511906	-3.46455	0.00053111	0.00180297
NEB	628.549	-1.77384	0.120481	-14.723	4.58778e-49	2.33578e-47
PKDCC	3056.93	-1.77691	0.0733156	-24.2365	9.17776e-130	1.96078e-127
CHRNA1	37.1827	-1.77771	0.383282	-4.63813	3.51573e-06	1.65404e-05
PLEKHG4	1328.58	-1.77865	0.081721	-21.7649	4.99542e-105	8.04192e-103
COL11A2	28.7941	-1.77908	0.440465	-4.03909	5.36587e-05	0.000213849
MTRES1	156.522	-1.78036	0.181796	-9.7932	1.20423e-22	1.98906e-21
SUOX	355.732	-1.78046	0.129906	-13.7058	9.37389e-43	3.86103e-41
ENG	14.0757	-1.78063	0.624807	-2.8499	0.00437336	0.0123823
CDHR3	92.8901	-1.78111	0.240071	-7.41908	1.17933e-13	1.11403e-12
AC009779.4	67.6015	-1.7859	0.274033	-6.51712	7.16698e-11	5.47767e-10
NRBP2	266.774	-1.78816	0.149456	-11.9645	5.45277e-33	1.537e-31
SERPINA4	330.29	-1.78892	0.13903	-12.8671	6.89171e-38	2.41263e-36
RTEL1-TNFRSF6B	41.4096	-1.78936	0.366731	-4.87921	1.06513e-06	5.3703e-06
FJX1	15.7573	-1.79206	0.57716	-3.10496	0.00190306	0.00584573
LBHD1	62.1505	-1.79508	0.293311	-6.12007	9.35319e-10	6.50286e-09
LBX2	67.3464	-1.79635	0.280499	-6.40412	1.51238e-10	1.13021e-09
CATSPERB	26.7026	-1.79677	0.430539	-4.17331	3.002e-05	0.000124729
NKD1	404.443	-1.79746	0.125088	-14.3696	8.0273e-47	3.80714e-45
AMIGO1	41.3191	-1.79937	0.361051	-4.98369	6.23829e-07	3.22131e-06
BTBD16	18.8164	-1.80182	0.520964	-3.45862	0.000542946	0.00183987
CD4	16.8598	-1.80282	0.55852	-3.22785	0.00124725	0.00397491
CACNA1D	925.761	-1.80478	0.0922491	-19.5642	3.12351e-85	3.64304e-83
PLIN4	9.3355	-1.81084	0.730851	-2.47772	0.0132226	0.033209
SLC1A2	14.0596	-1.81116	0.599352	-3.02187	0.00251218	0.00751387
SLC5A6	1136.17	-1.81299	0.0868093	-20.8847	7.36966e-97	1.0464e-94
MORN1	57.491	-1.82294	0.303431	-6.00777	1.88098e-09	1.27594e-08
ITPR2	860.785	-1.82347	0.110118	-16.5592	1.37364e-61	9.84368e-60
TPK1	95.5682	-1.82567	0.2594	-7.03804	1.94969e-12	1.68954e-11
HIF3A	183.828	-1.82572	0.178809	-10.2105	1.78024e-24	3.26091e-23
CPS1	296.321	-1.82583	0.153322	-11.9085	1.0692e-32	2.94837e-31
SCARF1	10.9292	-1.82795	0.690696	-2.64653	0.00813221	0.0215714
LCN12	169.242	-1.82847	0.179663	-10.1772	2.5065e-24	4.56926e-23
[truncated: 413 more rows]

## Sheet: uCaco-2_OD
The full list of differentially expressed genes in undifferentiated Caco-2 cells upon oxyquinoline derivative treatment.
Gene Symbol	baseMean	log2FoldChange	lfcSE	stat	pvalue	padj
NRN1	23.512	6.95926	1.22362	5.68744	1.28959e-08	6.86296e-08
C4orf47	11.6745	6.92326	1.26606	5.46834	4.54261e-08	2.29629e-07
UPK1A	7.63639	6.31511	1.30964	4.82203	1.42103e-06	6.20478e-06
RAI2	7.4348	6.27147	1.31997	4.75123	2.02186e-06	8.66077e-06
LGI4	133.651	6.1071	0.457037	13.3624	1.00292e-40	2.52506e-39
PCK1	10.8068	5.8293	1.27061	4.58781	4.47924e-06	1.83943e-05
IL21R	9.13149	5.57664	1.30065	4.28756	1.80645e-05	6.94847e-05
P2RX1	3.95733	5.34932	1.45989	3.6642	0.000248115	0.000818811
GAST	14.3225	5.33421	1.105	4.82733	1.38377e-06	6.04594e-06
HR	20.6115	5.26155	0.90051	5.84285	5.13142e-09	2.8212e-08
TCAF2	20.5117	5.25465	0.920905	5.70596	1.15686e-08	6.18829e-08
AOAH	3.60198	5.22935	1.44985	3.60681	0.000309982	0.00100888
ARMH4	3.59865	5.22832	1.44532	3.61742	0.000297559	0.000971027
CSTA	3.56642	5.21841	1.44794	3.60402	0.000313334	0.0010193
PTPRN	6.85238	5.15205	1.32189	3.89748	9.71996e-05	0.000340633
AQP10	94.3243	5.04471	0.397287	12.6979	6.07511e-37	1.3467e-35
ODF3L1	3.02432	4.97144	1.48979	3.337	0.000846879	0.0025785
KRT5	2.97651	4.95407	1.49944	3.30395	0.000953314	0.00287504
C11orf86	2.95094	4.94453	1.50875	3.27723	0.00104829	0.0031402
TLR4	5.83527	4.91746	1.34857	3.64643	0.000265909	0.000873786
CA9	5.79189	4.91258	1.34797	3.64442	0.000267993	0.000880217
CLC	5.71003	4.88313	1.3585	3.59451	0.000325007	0.00105432
GDF3	2.69048	4.80465	1.53894	3.12204	0.00179601	0.00519135
DKK4	5.29499	4.78132	1.36112	3.51279	0.000443429	0.00141569
FBXO32	19.1506	4.73061	0.810318	5.83797	5.28422e-09	2.90049e-08
FNDC11	2.53967	4.72053	1.57182	3.00323	0.00267126	0.00749998
LOX	302.978	4.71295	0.203471	23.1627	1.08165e-118	1.60479e-116
PPP1R3G	35.4199	4.60744	0.575012	8.01279	1.12139e-15	9.79084e-15
FCHO1	2.30252	4.56812	1.61362	2.83097	0.00464067	0.0124682
RAB6D	2.178	4.5058	1.61516	2.78969	0.00527583	0.0140439
AKNAD1	2.17134	4.50246	1.59901	2.81578	0.00486593	0.0130111
PLA2G3	2.17134	4.50246	1.59901	2.81578	0.00486593	0.0130111
ANGPTL7	11.964	4.45825	0.951639	4.68481	2.80218e-06	1.18061e-05
GNRH2	15.7658	4.43232	0.822883	5.38633	7.1911e-08	3.56483e-07
RHBDL3	2.04611	4.41159	1.61699	2.72828	0.00636665	0.0166724
VNN1	2.03386	4.40508	1.68823	2.60929	0.00907309	0.0229966
LGALS14	75.4865	4.37083	0.370941	11.7831	4.77263e-32	9.10306e-31
SPRR2D	3.98197	4.33993	1.41351	3.07033	0.00213823	0.00609987
DSCAML1	3.9144	4.32245	1.42099	3.04186	0.00235118	0.00665527
ANGPTL4	18.0006	4.30261	0.743524	5.78678	7.17499e-09	3.89931e-08
NNMT	10.804	4.28975	0.958164	4.47706	7.56793e-06	3.02273e-05
PLA2G4D	1.87306	4.28707	1.65365	2.59249	0.00952836	0.024042
TREML2	3.70797	4.25103	1.44374	2.94447	0.00323511	0.00894759
VIT	3.73505	4.23801	1.4402	2.94265	0.0032542	0.00899801
SKOR1	3.70282	4.22786	1.435	2.94625	0.00321656	0.00890222
LPO	1.74449	4.17888	1.69668	2.46297	0.0137791	0.0335726
TRPM2	1.69669	4.14845	1.70307	2.43587	0.0148561	0.0359646
GPA33	6.56265	4.14776	1.1962	3.46746	0.000525406	0.00165728
NYAP2	6.48371	4.14747	1.18896	3.48832	0.00048606	0.00154137
MMP28	1.66446	4.12661	1.73929	2.37258	0.0176643	0.0420522
LSP1	3.40635	4.12223	1.45774	2.82782	0.00468662	0.0125721
CALHM3	3.35724	4.09532	1.52169	2.69129	0.00711761	0.0184823
PPBP	3.34674	4.07821	1.45749	2.7981	0.00514041	0.0137058
IL34	3.30335	4.06956	1.45693	2.79324	0.00521822	0.0138976
DDIT4	694.904	4.04995	0.118644	34.1354	2.2016e-255	1.34498e-252
HPCAL4	6.04106	4.03323	1.19982	3.36152	0.000775141	0.00237295
DMBX1	14.7105	3.99515	0.76907	5.19478	2.04959e-07	9.75081e-07
BNIP3	2607.94	3.98738	0.0638205	62.4781	0	0
ABCB4	3.129	3.9807	1.47469	2.69935	0.00694758	0.0180724
CNTFR	19.8756	3.93438	0.652105	6.03336	1.60587e-09	9.16611e-09
LCK	3.00376	3.91398	1.48125	2.64236	0.00823305	0.0210992
CBFA2T3	16.5367	3.88936	0.712001	5.46257	4.69281e-08	2.36991e-07
EVPL	5.52011	3.87112	1.22262	3.16624	0.00154422	0.00451632
CD300C	2.81312	3.82767	1.51249	2.53071	0.0113833	0.0282219
FGR	2.80979	3.82633	1.50523	2.54203	0.0110211	0.0274251
KRT6A	89.7132	3.82613	0.320335	11.9442	6.96505e-33	1.35969e-31
PFKFB4	1495.73	3.80274	0.0784028	48.5027	0	0
RNF183	300.28	3.78098	0.164971	22.9191	2.99859e-116	4.18011e-114
FAM189A2	2.73236	3.77205	1.52259	2.47738	0.013235	0.0323531
BSND	2.70548	3.75037	1.51078	2.4824	0.01305	0.0319459
NPHS1	2.69882	3.74743	1.52566	2.45627	0.0140388	0.0341492
TNNI2	191.677	3.68094	0.203659	18.074	5.10505e-73	3.1465e-71
ZMYND10	4.90109	3.67707	1.25689	2.92554	0.00343864	0.00947268
ITGB2	2.53374	3.6618	1.53005	2.39326	0.0166995	0.0399859
CCDC187	2.47928	3.63711	1.54158	2.35934	0.0183074	0.0434389
PIK3IP1	61.2279	3.59962	0.348989	10.3144	6.06487e-25	8.56963e-24
BNIP3L	1144.02	3.58181	0.0841612	42.5589	0	0
NEURL1	15.3279	3.53751	0.677588	5.22074	1.78206e-07	8.521e-07
FLT1	15.3428	3.53683	0.676357	5.22924	1.70211e-07	8.14807e-07
CDYL2	32.5317	3.51915	0.471155	7.4692	8.06865e-14	6.36997e-13
LPAR5	8.57584	3.51149	0.915761	3.83451	0.000125816	0.000434685
ACTBL2	10.8344	3.50046	0.815505	4.29239	1.76763e-05	6.81052e-05
RUNX2	4.2786	3.47444	1.28072	2.71287	0.00667023	0.0174033
IFIT2	53.9877	3.44325	0.357542	9.63034	5.95333e-22	7.29107e-21
B3GAT1	4.02276	3.3778	1.29358	2.6112	0.00902261	0.0228798
PRF1	19.73	3.37171	0.576869	5.84484	5.0704e-09	2.78912e-08
HIVEP2	171.578	3.35773	0.204418	16.4258	1.24986e-60	5.61923e-59
TLR3	3.94917	3.34716	1.31353	2.54822	0.0108275	0.0269857
RNF125	25.0716	3.32678	0.511621	6.50244	7.90281e-11	5.05541e-10
FRMD3	7.78236	3.31173	0.956882	3.46096	0.000538253	0.00169395
SLCO2A1	125.414	3.30956	0.228846	14.462	2.10619e-47	6.53925e-46
PRTN3	5.63263	3.30181	1.06736	3.09343	0.00197859	0.0056733
IL36RN	13.1028	3.29752	0.701666	4.69956	2.60726e-06	1.10229e-05
PDK1	1171.75	3.269	0.0785421	41.621	0	0
LRRC10B	7.34346	3.26269	0.937998	3.47835	0.000504504	0.00159669
EMP1	613.924	3.2606	0.109202	29.8583	6.84952e-196	2.41138e-193
SLC39A2	21.9428	3.25683	0.534689	6.09107	1.12155e-09	6.49451e-09
PSCA	3.56348	3.25396	1.33441	2.43851	0.014748	0.0357154
RNF223	22.1409	3.24762	0.537527	6.04177	1.52428e-09	8.71479e-09
ADAMTS15	16.438	3.24018	0.621877	5.21033	1.88506e-07	8.99278e-07
NDRG1	2053.49	3.2349	0.0693968	46.6145	0	0
TPBGL	7.33562	3.23388	0.925579	3.4939	0.000476019	0.00151137
C1orf21	5.2522	3.19362	1.07775	2.96324	0.00304419	0.00845559
BHLHE40	869.883	3.18894	0.089729	35.5397	1.19961e-276	8.899e-274
SLC25A27	3.53478	3.17173	1.30715	2.42645	0.0152473	0.0368301
ABCG1	3.43715	3.16978	1.32799	2.3869	0.0169913	0.0406176
CHRM4	17.4451	3.16192	0.593839	5.32454	1.01209e-07	4.95219e-07
USH1G	13.6727	3.13744	0.672723	4.6638	3.10427e-06	1.30234e-05
ELOVL4	11.6174	3.12044	0.721832	4.32295	1.53958e-05	5.97061e-05
GCGR	3.3842	3.10767	1.33912	2.32067	0.0203044	0.0476816
P4HA1	5419.18	3.08914	0.042847	72.097	0	0
ALDOC	1839.89	3.08618	0.0689058	44.7884	0	0
WNT9A	78.0065	3.08322	0.289027	10.6676	1.44316e-26	2.16432e-25
C17orf78	4.90417	3.07628	1.0943	2.8112	0.00493577	0.0131911
FRMPD1	3.30394	3.07152	1.32749	2.31379	0.0206792	0.048463
ANKRD37	82.0565	3.04792	0.275816	11.0506	2.17869e-28	3.52992e-27
ERFL	4.84339	3.04764	1.10095	2.7682	0.00563668	0.0149051
IL15	6.38559	3.04325	0.968699	3.14159	0.00168035	0.0048808
TNFSF9	50.1277	3.04273	0.345165	8.8153	1.1937e-18	1.24595e-17
FGF19	21.0338	3.03985	0.528781	5.74879	8.98825e-09	4.85174e-08
GJA3	6.39167	3.03735	0.961298	3.15963	0.00157967	0.00461093
SEC14L5	9.5643	3.02972	0.786318	3.85305	0.000116656	0.000404654
WNT9B	19.141	3.02131	0.556175	5.43229	5.56343e-08	2.78856e-07
SYT8	541.006	3.0035	0.108608	27.6545	2.46161e-168	6.39127e-166
HTRA1	24.9201	2.99479	0.475654	6.29616	3.05105e-10	1.86119e-09
CDKN1A	360.748	2.99171	0.134825	22.1896	4.3296e-109	5.35298e-107
MYOZ1	4.62232	2.97196	1.09498	2.71417	0.00664412	0.0173417
MRGPRX1	12.2421	2.96898	0.680733	4.36144	1.29207e-05	5.03993e-05
BACH2	7.55902	2.9488	0.858167	3.43616	0.00059002	0.0018429
PPFIA4	643.98	2.94317	0.10062	29.2503	4.45248e-188	1.44504e-185
SLC16A3	664.13	2.94145	0.0961641	30.5878	1.77613e-205	6.70762e-203
ENO2	1531.4	2.93631	0.0681993	43.0549	0	0
SUSD2	1278.3	2.90494	0.0754295	38.512	0	0
TSC22D3	36.912	2.9043	0.386846	7.50763	6.02057e-14	4.78948e-13
ADGRF2	385.161	2.90287	0.126616	22.9266	2.52566e-116	3.54463e-114
PANX2	83.8865	2.90187	0.259817	11.1689	5.79023e-29	9.62921e-28
KIAA0319	61.1414	2.88052	0.302358	9.52685	1.62126e-21	1.94767e-20
PLOD2	3938.46	2.87985	0.0514886	55.9318	0	0
TCP11L2	134.458	2.86991	0.207983	13.7988	2.59144e-43	7.10117e-42
TUBA1A	490.271	2.86916	0.110965	25.8565	2.0556e-147	4.22741e-145
YPEL2	210.122	2.86853	0.164269	17.4624	2.77222e-68	1.47268e-66
BNIP5	108.468	2.86847	0.2327	12.3269	6.49204e-35	1.3566e-33
SMIM38	8.5282	2.85704	0.808552	3.53353	0.000410045	0.00131558
INHBA	4.20416	2.85353	1.16828	2.44252	0.0145853	0.0353542
SRMS	5.70457	2.84984	0.985059	2.89306	0.00381505	0.0104308
TRIM36	35.5889	2.84721	0.390533	7.29058	3.08629e-13	2.34046e-12
SCARF1	14.0824	2.83638	0.625774	4.5326	5.82609e-06	2.36124e-05
HRK	5.69058	2.81802	0.985967	2.85813	0.00426151	0.01154
NSG1	98.328	2.81749	0.239295	11.7741	5.30532e-32	1.00728e-30
C1QTNF2	12.5816	2.80702	0.655141	4.28461	1.83062e-05	7.03723e-05
FXYD3	22.3615	2.79875	0.495565	5.64759	1.62713e-08	8.55841e-08
GPR146	28.994	2.79791	0.431595	6.48273	9.00805e-11	5.72715e-10
SLC6A8	437.821	2.79558	0.113106	24.7165	7.11168e-135	1.29576e-132
CD300LF	78.7023	2.79543	0.259632	10.7669	4.93506e-27	7.60432e-26
TMEM59L	4.12187	2.78065	1.13332	2.45355	0.0141454	0.0343722
TRERF1	87.4182	2.77659	0.246537	11.2623	2.01329e-29	3.44182e-28
RRAGD	158.54	2.77346	0.191276	14.4998	1.21493e-47	3.80049e-46
HSPA6	4.13136	2.77275	1.1498	2.41151	0.0158864	0.038236
PCDH1	202.013	2.75899	0.165677	16.6528	2.88558e-62	1.35297e-60
DLGAP3	4.06109	2.74512	1.14771	2.39182	0.0167648	0.040127
DACT3	24.0166	2.73769	0.471463	5.80681	6.36757e-09	3.47323e-08
NR3C2	3.95014	2.7375	1.14576	2.38925	0.0168826	0.0403811
PTHLH	9.42804	2.73477	0.748704	3.65267	0.000259528	0.000853762
PIP5KL1	17.3051	2.72644	0.569248	4.78954	1.67163e-06	7.23212e-06
ANKRD44	7.89391	2.72045	0.810131	3.35803	0.000784997	0.00240135
OSCAR	5.14682	2.70592	1.02912	2.62936	0.00855456	0.0218235
CCL26	3.90349	2.70375	1.1516	2.34781	0.018884	0.0446844
FHL1	5.21745	2.69922	0.987086	2.73454	0.00624679	0.0163932
CLIC3	29.9877	2.69299	0.413672	6.50997	7.51683e-11	4.82484e-10
CHST7	128.137	2.69218	0.21071	12.7767	2.21157e-37	4.99854e-36
COL17A1	37.7459	2.69046	0.371257	7.2469	4.2642e-13	3.20912e-12
PDE2A	15.3617	2.67794	0.590446	4.53546	5.74783e-06	2.33043e-05
BMP6	273.294	2.67405	0.148073	18.0591	6.69339e-73	4.10113e-71
ZDHHC11B	7.81304	2.67282	0.830413	3.21866	0.00128789	0.00381827
TMEM145	43.4151	2.67262	0.346062	7.72296	1.13658e-14	9.3682e-14
C14orf132	9.03806	2.6712	0.75426	3.54149	0.000397876	0.00127831
PLCH2	11.5046	2.65505	0.662423	4.00809	6.12124e-05	0.000220737
MAPK15	7.64342	2.65238	0.843342	3.14508	0.00166041	0.0048276
SAMD9	15.344	2.65199	0.599222	4.42572	9.6121e-06	3.80509e-05
DNAI1	5.13588	2.64963	1.04141	2.54427	0.0109507	0.0272665
INHA	39.3145	2.64701	0.365999	7.23229	4.74908e-13	3.55984e-12
COPZ2	18.9133	2.64068	0.520147	5.07679	3.83856e-07	1.77416e-06
IL15RA	21.4229	2.64056	0.483491	5.46144	4.72288e-08	2.38451e-07
APLP1	216.381	2.63269	0.155266	16.956	1.73765e-64	8.5731e-63
SPAG4	187.773	2.63173	0.165284	15.9225	4.42529e-57	1.85318e-55
HTRA3	8.69126	2.63099	0.77003	3.41674	0.000633759	0.00197089
CXCR4	62.4668	2.62957	0.295141	8.90953	5.12511e-19	5.42301e-18
PLXNA2	350.123	2.62843	0.123442	21.2928	1.32475e-100	1.43315e-98
TUBA3E	11.0237	2.62116	0.70291	3.72901	0.000192236	0.000645271
VPS37D	29.4825	2.60127	0.421133	6.17685	6.5395e-10	3.86215e-09
AFAP1L1	14.7292	2.59862	0.590706	4.39917	1.08665e-05	4.27638e-05
CRIP2	62.9565	2.59602	0.290637	8.9322	4.1763e-19	4.43259e-18
HES2	30.7142	2.59472	0.412445	6.29107	3.15285e-10	1.91934e-09
TRIM29	240.202	2.59373	0.156971	16.5237	2.4778e-61	1.13863e-59
CEACAM7	17.1263	2.59052	0.537974	4.81533	1.46959e-06	6.40738e-06
PNCK	6.07674	2.58578	0.900017	2.87303	0.00406554	0.0110502
SERPINE2	112.82	2.58009	0.213765	12.0697	1.52631e-33	3.04252e-32
WNT7B	23.246	2.57565	0.484116	5.32032	1.03584e-07	5.06363e-07
KRT9	4.91575	2.57234	1.03395	2.48788	0.0128507	0.0315025
PIK3CD	72.2566	2.56589	0.261072	9.82829	8.50529e-23	1.08516e-21
PLAUR	147.777	2.56468	0.189367	13.5435	8.65971e-42	2.27397e-40
AHNAK2	24.263	2.56417	0.477287	5.3724	7.76963e-08	3.83788e-07
CCNG2	572.491	2.55491	0.0993936	25.7049	1.02941e-145	2.09626e-143
HAP1	109.35	2.54487	0.220582	11.5371	8.58055e-31	1.56476e-29
ULBP1	161.565	2.5414	0.179665	14.1452	1.99954e-45	5.90788e-44
STING1	4.74945	2.54123	1.01388	2.50644	0.0121952	0.0300411
GBE1	721.644	2.54102	0.0877217	28.9668	1.72386e-184	5.4252e-182
JAKMIP3	54.6437	2.53708	0.305903	8.29373	1.09748e-16	1.01721e-15
BHLHE41	17.8701	2.53398	0.554976	4.56593	4.97284e-06	2.03089e-05
ADGRG2	14.2131	2.5292	0.593625	4.2606	2.03878e-05	7.80598e-05
ENDOU	5.95055	2.51885	0.932462	2.70129	0.00690717	0.0179808
SMIM35	23.6389	2.51196	0.469465	5.35069	8.76177e-08	4.30849e-07
CYS1	31.4981	2.51081	0.404999	6.19953	5.66321e-10	3.36087e-09
TAC4	28.9144	2.50159	0.415671	6.01818	1.76384e-09	1.00342e-08
WNT1	6.86876	2.50009	0.858405	2.91248	0.00358569	0.00984903
RAB6B	127.772	2.48957	0.198359	12.5508	3.93468e-36	8.50439e-35
ANKFN1	6.90272	2.48824	0.840315	2.96108	0.00306566	0.00851251
MAFA	6.91394	2.47596	0.872766	2.83691	0.00455524	0.0122545
NR4A2	36.5325	2.47457	0.378106	6.54466	5.96302e-11	3.84891e-10
SP140L	14.6398	2.47018	0.574515	4.29959	1.71111e-05	6.60255e-05
TRIM54	15.7947	2.467	0.577163	4.27435	1.91692e-05	7.35297e-05
FXYD6	8.01568	2.46491	0.799661	3.08244	0.00205309	0.00587151
TMOD2	5.51886	2.46315	0.950051	2.59266	0.0095238	0.0240363
MUC17	47.3689	2.46088	0.319234	7.70869	1.27117e-14	1.04444e-13
TPPP	38.4397	2.45552	0.356823	6.88161	5.91802e-12	4.10565e-11
PRRT4	7.94005	2.45381	0.787713	3.1151	0.00183883	0.00530035
NOS3	9.04082	2.45066	0.734761	3.33532	0.000852013	0.00259337
WFIKKN1	17.7662	2.44165	0.525711	4.64447	3.40947e-06	1.42377e-05
SLPI	84.6434	2.43419	0.244435	9.9584	2.31761e-23	3.041e-22
SLC35E4	39.3398	2.43273	0.37665	6.45886	1.05494e-10	6.67646e-10
NGFR	7.7623	2.43251	0.789204	3.08223	0.00205457	0.00587492
S100P	169.917	2.42446	0.170095	14.2536	4.25843e-46	1.27821e-44
TMEM40	35.6148	2.41722	0.375558	6.43635	1.22382e-10	7.69836e-10
UNC5B	1395.56	2.40259	0.0634446	37.8691	0	0
CDA	173.994	2.40063	0.168213	14.2713	3.30145e-46	9.92394e-45
MAOA	35.2317	2.39991	0.374728	6.4044	1.50961e-10	9.41341e-10
YPEL1	9.71601	2.39762	0.69449	3.45234	0.000555741	0.0017437
SPN	5.48908	2.39625	0.939851	2.5496	0.0107846	0.0268947
SCN5A	14.2689	2.39535	0.57486	4.16685	3.08843e-05	0.000115439
FADS6	45.5458	2.38719	0.323483	7.37966	1.58698e-13	1.2263e-12
ARTN	6.41552	2.38427	0.872046	2.73411	0.00625495	0.0164105
P4HA2	3087.76	2.38134	0.0486362	48.9624	0	0
IL1A	6.37019	2.37855	0.86049	2.76418	0.00570662	0.0150785
SIX2	35.5907	2.37666	0.361242	6.57915	4.73133e-11	3.07781e-10
TXK	17.3155	2.37427	0.521353	4.55406	5.26203e-06	2.14225e-05
PRKAR2B	6.47529	2.37196	0.85368	2.77852	0.00546076	0.0144842
TG	22.5233	2.37069	0.46176	5.13403	2.83606e-07	1.33095e-06
ECM1	127.691	2.36598	0.210303	11.2504	2.30605e-29	3.92293e-28
KRT81	5.484	2.36586	0.947629	2.49661	0.0125386	0.030792
PDIA2	9.68623	2.36055	0.693676	3.40296	0.00066659	0.00206437
PTGES	178.528	2.35332	0.164528	14.3035	2.0808e-46	6.30034e-45
CIART	119.43	2.35289	0.201078	11.7014	1.25362e-31	2.34586e-30
IRS2	282.551	2.35152	0.132477	17.7504	1.70991e-70	9.5732e-69
MAPK4	27.1808	2.34418	0.435121	5.38742	7.14772e-08	3.54586e-07
CACNA1G	66.5894	2.34278	0.265746	8.81588	1.1875e-18	1.2401e-17
MXD1	594.936	2.3285	0.0947193	24.5832	1.91272e-133	3.42493e-131
FAXC	8.20033	2.32167	0.7547	3.07628	0.00209601	0.00598437
SPDEF	15.587	2.3167	0.54076	4.28416	1.83434e-05	7.04924e-05
INSIG2	760.913	2.313	0.0862229	26.8258	1.61716e-158	3.61183e-156
WDR54	249.364	2.31222	0.138396	16.7073	1.15994e-62	5.50072e-61
ANKRD55	28.8551	2.30936	0.403977	5.71658	1.08691e-08	5.82914e-08
TMCC3	123.155	2.30844	0.19717	11.7079	1.16188e-31	2.18204e-30
CRYBG3	134.934	2.30727	0.191233	12.0652	1.61237e-33	3.2079e-32
GRM2	7.42488	2.30361	0.830455	2.77391	0.00553872	0.0146686
CKB	15986.2	2.2986	0.0413981	55.5243	0	0
FGFBP1	68.1003	2.29732	0.262289	8.75874	1.97442e-18	2.03123e-17
KLF4	218.154	2.29365	0.150162	15.2745	1.13035e-52	4.14082e-51
COL16A1	20.5336	2.29346	0.472931	4.84947	1.23793e-06	5.43616e-06
REPS2	17.3871	2.28689	0.521666	4.38383	1.16613e-05	4.57444e-05
HOGA1	8.17475	2.28409	0.746832	3.05837	0.00222544	0.00632868
NR4A3	7.22758	2.27552	0.809791	2.81001	0.00495398	0.0132329
SLC1A4	1093.85	2.27288	0.070749	32.126	1.91434e-226	8.64408e-224
TSPAN1	23.1899	2.27159	0.450886	5.03806	4.70266e-07	2.15057e-06
SCN4B	45.65	2.26281	0.318767	7.09862	1.26005e-12	9.18333e-12
NPTX1	36.4858	2.26037	0.358183	6.31066	2.77842e-10	1.70137e-09
PTAFR	14.2127	2.25989	0.568982	3.97181	7.13277e-05	0.000255221
SSBP2	20.9395	2.259	0.473824	4.7676	1.86431e-06	8.02561e-06
EEF1A2	227.06	2.24658	0.143297	15.6778	2.14474e-55	8.56702e-54
FBXL16	204.564	2.24173	0.165419	13.5518	7.72598e-42	2.03392e-40
ARHGDIG	10.0073	2.23845	0.670243	3.33976	0.000838512	0.0025549
ULBP2	350.11	2.23593	0.117224	19.074	4.15601e-81	3.09407e-79
HELZ2	914.054	2.22738	0.0772353	28.8389	6.97546e-183	2.1307e-180
CCDC17	37.4131	2.22592	0.355397	6.26321	3.77135e-10	2.2785e-09
GPR37L1	12.6512	2.22391	0.601178	3.69926	0.00021623	0.000719993
SPRR3	41.6071	2.22353	0.335742	6.62273	3.52618e-11	2.31706e-10
CYP4F2	6.82342	2.21711	0.811623	2.7317	0.00630089	0.0165143
BTN3A1	86.3996	2.21051	0.241065	9.16977	4.74023e-20	5.28215e-19
RASSF5	32.3249	2.21021	0.397015	5.56708	2.59047e-08	1.33814e-07
TANC2	18.4763	2.21013	0.501115	4.41043	1.03165e-05	4.07385e-05
EFNA3	39.8774	2.20709	0.344292	6.41052	1.45022e-10	9.04578e-10
USP18	22.5944	2.20669	0.457948	4.81865	1.4453e-06	6.30545e-06
P2RX2	6.00611	2.20504	0.905113	2.43621	0.0148421	0.035935
NDRG4	311.078	2.20178	0.123288	17.8588	2.46894e-71	1.43648e-69
KLHL24	279.636	2.20146	0.130464	16.8741	6.97776e-64	3.41024e-62
ISG20	102.261	2.19597	0.217102	10.1149	4.7429e-24	6.38877e-23
HGFAC	17.3953	2.19414	0.515647	4.25512	2.08933e-05	7.98482e-05
ABTB1	173.039	2.19074	0.16474	13.2981	2.37277e-40	5.90236e-39
GFPT2	39.3778	2.179	0.342056	6.37031	1.88646e-10	1.16827e-09
CSDC2	12.3849	2.17737	0.612405	3.55545	0.000377335	0.00121665
MX1	12.4982	2.16907	0.594637	3.64772	0.000264577	0.000869684
APOL6	529.668	2.16761	0.0980609	22.1048	2.84453e-108	3.41524e-106
CD82	59.771	2.16589	0.289423	7.48346	7.2391e-14	5.7325e-13
GUCA2A	289.263	2.16	0.136303	15.847	1.47496e-56	6.07865e-55
IQSEC2	16.1324	2.15577	0.530225	4.06576	4.7877e-05	0.000174803
TP53INP2	1264.54	2.15551	0.0639702	33.6955	6.72165e-249	3.57988e-246
CYP26A1	10.3288	2.15454	0.66227	3.25326	0.00114087	0.00340181
IL6R	484.91	2.14946	0.100611	21.3641	2.88332e-101	3.15208e-99
SEPTIN3	62.3432	2.14895	0.277112	7.75482	8.84688e-15	7.32982e-14
ZNF699	9.43324	2.14738	0.695838	3.08603	0.00202846	0.00580827
CLRN3	19.9111	2.14593	0.491478	4.36628	1.26379e-05	4.93889e-05
TUBAL3	6.58771	2.1426	0.830698	2.57927	0.0099009	0.0248702
FAM131C	9.44924	2.14184	0.677708	3.16041	0.00157546	0.00459993
ZNF470	11.4021	2.14081	0.636597	3.36289	0.000771297	0.00236257
KCNMB4	5.65265	2.13645	0.879396	2.42945	0.0151219	0.0365611
ROPN1L	7.43246	2.13463	0.79078	2.6994	0.00694651	0.0180719
SLC7A11	958.087	2.12924	0.0747723	28.4764	2.29972e-178	6.63439e-176
HCN2	127.289	2.12869	0.198309	10.7342	7.03341e-27	1.07105e-25
DUSP5	1806.38	2.12396	0.0569029	37.326	6.22125e-305	5.16886e-302
ASNS	47.4934	2.12351	0.303227	7.00305	2.50456e-12	1.78709e-11
MPIG6B	21.1768	2.12104	0.45886	4.6224	3.79318e-06	1.5745e-05
GPR162	12.1805	2.11942	0.60059	3.52889	0.000417301	0.001337
PLEKHD1	14.8184	2.10634	0.558589	3.77082	0.000162715	0.000553151
GFI1	82.9609	2.10583	0.230823	9.12317	7.29609e-20	8.05244e-19
DNAJC12	20.4544	2.10504	0.471341	4.46606	7.96721e-06	3.17755e-05
TMEM255B	15.6455	2.102	0.534838	3.93017	8.48856e-05	0.000299857
MYH15	22.0903	2.10096	0.441972	4.7536	1.99824e-06	8.56443e-06
PDZD4	75.5179	2.10059	0.241441	8.70025	3.31149e-18	3.36841e-17
PNMA2	91.5739	2.09946	0.224383	9.35661	8.23396e-21	9.53331e-20
KIF5C	33.072	2.09884	0.361779	5.80145	6.57433e-09	3.58225e-08
SLC2A12	10.1249	2.09741	0.666879	3.14511	0.00166024	0.0048276
CSF1R	238.007	2.09649	0.137065	15.2956	8.17543e-53	3.01085e-51
CD109	20.9782	2.08539	0.450949	4.62445	3.75592e-06	1.56153e-05
ENTPD2	74.6165	2.07693	0.244087	8.50897	1.75483e-17	1.69533e-16
MUC13	412.663	2.07558	0.113894	18.2237	3.34575e-74	2.11874e-72
CEP85L	10.778	2.06096	0.657645	3.13385	0.00172532	0.00500092
NUP62CL	26.7822	2.06009	0.408169	5.04716	4.48429e-07	2.05887e-06
TP53I11	91.6834	2.05917	0.220279	9.34801	8.93098e-21	1.03215e-19
STYK1	300.504	2.05878	0.126532	16.2708	1.59053e-59	7.04411e-58
MXI1	313.673	2.05843	0.12088	17.0287	5.03028e-65	2.52377e-63
R3HDML	7.14395	2.05825	0.788003	2.61199	0.00900173	0.0228352
CTH	265.085	2.05652	0.131392	15.6518	3.22822e-55	1.28209e-53
TTBK1	19.8631	2.05531	0.472084	4.35371	1.33855e-05	5.21339e-05
KDM3A	3199.36	2.05503	0.047882	42.9186	0	0
TNS1	1009.51	2.0478	0.0707327	28.9513	2.7063e-184	8.38992e-182
GPC4	17.6487	2.04286	0.507609	4.02448	5.7101e-05	0.0002067
MTURN	102.151	2.04079	0.211219	9.66193	4.37549e-22	5.4065e-21
SLC2A5	169.746	2.04071	0.163734	12.4636	1.17981e-35	2.50826e-34
CDH23	12.4886	2.03905	0.60307	3.38111	0.000721928	0.00222183
LONRF3	24.9785	2.03788	0.422072	4.82828	1.37715e-06	6.01954e-06
LINC00514	51.486	2.03757	0.291655	6.98623	2.82373e-12	2.00587e-11
RTN4RL1	9.6851	2.03653	0.665989	3.0579	0.00222891	0.00633768
PTGER2	29.3379	2.03421	0.387345	5.25168	1.50721e-07	7.25183e-07
KIF1A	1620	2.02471	0.0590846	34.268	2.35119e-257	1.47989e-254
DLX3	81.2805	2.02421	0.231833	8.73131	2.51736e-18	2.57958e-17
PLEKHA2	380.427	2.02103	0.111275	18.1626	1.0214e-73	6.3902e-72
SPOCK2	35.2748	2.01597	0.353755	5.69877	1.20672e-08	6.44507e-08
PLAU	79.6291	2.0159	0.234873	8.58293	9.24844e-18	9.1172e-17
PAG1	268.6	2.00754	0.142164	14.1213	2.80892e-45	8.24069e-44
RNF24	934.093	2.00002	0.0731926	27.3254	2.11481e-164	5.04905e-162
DOK7	13.0055	1.99912	0.590832	3.38357	0.000715506	0.00220403
HLA-DMA	34.0403	1.998	0.353696	5.64892	1.6146e-08	8.49464e-08
ADGRB2	44.4912	1.99626	0.316841	6.3005	2.96678e-10	1.81244e-09
GLI2	17.1609	1.99028	0.497082	4.00393	6.22981e-05	0.000224457
GPX8	183.282	1.98787	0.154261	12.8864	5.36628e-38	1.23164e-36
SP110	9.51807	1.98221	0.664784	2.98173	0.00286622	0.0079987
CSRP2	422.922	1.9793	0.10724	18.4567	4.60356e-76	3.1351e-74
GRIN3B	9.50055	1.97462	0.68158	2.89712	0.00376611	0.0103105
CDH16	106.657	1.96202	0.224127	8.75404	2.0584e-18	2.11554e-17
EFEMP2	17.0826	1.96085	0.494825	3.9627	7.41064e-05	0.000264387
ERO1B	44.0328	1.96061	0.318636	6.15313	7.59684e-10	4.46502e-09
MT1A	6.84741	1.95677	0.804704	2.43167	0.0150296	0.0363464
SLC7A4	7.66706	1.95614	0.749365	2.61039	0.00904378	0.0229307
SLC6A12	55.1844	1.9559	0.277428	7.05012	1.78762e-12	1.28658e-11
BMP8A	87.6634	1.95587	0.225421	8.67652	4.0806e-18	4.12047e-17
FOSB	38.1006	1.95468	0.331251	5.9009	3.61528e-09	2.01214e-08
ANKZF1	1677.74	1.94902	0.0591232	32.9654	2.54695e-238	1.2303e-235
PMAIP1	27.6519	1.94836	0.401767	4.84949	1.23781e-06	5.43616e-06
TMCC1	1101.95	1.94431	0.0680891	28.5554	2.40558e-179	7.03751e-177
GDPD2	130.986	1.94189	0.184975	10.4981	8.81213e-26	1.28899e-24
TGM1	89.736	1.94058	0.222435	8.72426	2.67928e-18	2.74144e-17
GOLGA8A	830.903	1.93713	0.0808549	23.9581	7.61381e-127	1.21651e-124
ITGA2B	18.5531	1.93665	0.489392	3.95725	7.58183e-05	0.000270216
BCO1	31.3823	1.93652	0.376775	5.13973	2.75128e-07	1.29262e-06
SNTA1	625.262	1.9364	0.0906949	21.3508	3.83714e-101	4.17284e-99
GPR137B	145.849	1.93624	0.181199	10.6857	1.18707e-26	1.7893e-25
TRIM7	18.5733	1.93413	0.494597	3.91051	9.21022e-05	0.000323698
CYBRD1	122.965	1.9328	0.190974	10.1208	4.46942e-24	6.03997e-23
TCAP	14.2016	1.93214	0.545461	3.54221	0.000396789	0.00127561
GABRA2	26.9827	1.93205	0.402458	4.80062	1.58178e-06	6.87058e-06
MEX3B	12.3177	1.93143	0.599976	3.21919	0.00128555	0.00381189
ZNF772	11.5474	1.92928	0.613216	3.14617	0.00165424	0.00481237
SMIM32	14.0439	1.92869	0.549143	3.51219	0.000444434	0.00141868
RIMS4	132.294	1.92804	0.180752	10.6667	1.45637e-26	2.18099e-25
ATG9B	46.396	1.92717	0.310365	6.20936	5.32004e-10	3.16263e-09
CCDC183	35.6589	1.92704	0.351202	5.48699	4.08842e-08	2.07427e-07
ERICH4	10.0166	1.9266	0.64534	2.98541	0.00283203	0.00791498
ZFYVE28	20.7621	1.9255	0.456404	4.21885	2.45554e-05	9.29205e-05
GUCA2B	8.31819	1.92523	0.700809	2.74716	0.00601142	0.0158256
SCN1B	60.2182	1.92346	0.27772	6.92591	4.33173e-12	3.03455e-11
RNF122	50.5045	1.91519	0.293971	6.51491	7.27331e-11	4.67143e-10
EIF4E3	35.8802	1.9141	0.347551	5.50739	3.64183e-08	1.85585e-07
GNAO1	11.5304	1.91368	0.609634	3.13906	0.00169493	0.00492038
ATF3	1052.57	1.91364	0.0686035	27.8942	3.13587e-171	8.80203e-169
DPYSL5	17.6585	1.91172	0.50918	3.75451	0.000173683	0.000587648
RUNX3	62.7517	1.91083	0.261979	7.29382	3.01291e-13	2.28649e-12
CHAC1	450.284	1.91034	0.105656	18.0807	4.52581e-73	2.79778e-71
DENND2C	42.0871	1.90743	0.32496	5.86973	4.36504e-09	2.41455e-08
TEC	98.9726	1.90709	0.206886	9.21808	3.02481e-20	3.42202e-19
NXPH4	84.4687	1.90652	0.23208	8.21494	2.12262e-16	1.93543e-15
PNRC1	535.685	1.90519	0.0948249	20.0917	8.72693e-90	7.74646e-88
LY6G6C	92.497	1.90157	0.215198	8.83639	9.88627e-19	1.03659e-17
VASH2	63.8036	1.89729	0.263825	7.19147	6.40986e-13	4.75667e-12
MAP1A	135.58	1.89496	0.17673	10.7224	7.99223e-27	1.21439e-25
KCTD11	439.812	1.89399	0.103265	18.3411	3.88751e-75	2.56342e-73
MYEOV	18.8178	1.89357	0.480464	3.94112	8.11012e-05	0.000287909
RGS11	84.8912	1.89299	0.225427	8.39735	4.56681e-17	4.32545e-16
TUBB3	58.804	1.89246	0.265759	7.12097	1.07167e-12	7.8545e-12
C2orf92	41.095	1.89116	0.338149	5.59268	2.23596e-08	1.16166e-07
PFKFB3	2275.2	1.88965	0.0523062	36.1267	8.63918e-286	6.64609e-283
CCDC136	74.4777	1.88918	0.238902	7.90775	2.62077e-15	2.24571e-14
WNT11	627.35	1.88849	0.0875349	21.5741	3.14314e-103	3.58716e-101
NECTIN4	7.54167	1.88771	0.794803	2.37507	0.0175456	0.0417839
NACAD	45.8203	1.88381	0.300832	6.26199	3.80107e-10	2.29578e-09
MAP1B	9.01182	1.87927	0.676601	2.77752	0.00547757	0.014525
APOL2	382.85	1.87841	0.108466	17.3179	3.44764e-67	1.78581e-65
BIRC7	7.14542	1.87391	0.770257	2.43283	0.0149812	0.0362422
SCD5	84.119	1.87253	0.224625	8.33624	7.66889e-17	7.16879e-16
AKR1C2	280.632	1.86962	0.129555	14.4311	3.29813e-47	1.01791e-45
SLC30A3	51.0685	1.86678	0.286959	6.50538	7.74955e-11	4.96655e-10
SLC27A1	90.2355	1.85897	0.218207	8.5193	1.60522e-17	1.55586e-16
TINCR	133.755	1.85297	0.181453	10.2118	1.75517e-24	2.43531e-23
CRB2	10.5401	1.85178	0.644227	2.87442	0.00404765	0.0110087
EMILIN3	11.1254	1.84648	0.608139	3.03629	0.00239512	0.00677226
CEMIP	89.3563	1.84506	0.21562	8.55699	1.15852e-17	1.1324e-16
GAREM1	40.7823	1.84426	0.328918	5.60706	2.05795e-08	1.07293e-07
DLX2	12.6139	1.8438	0.585221	3.15061	0.00162928	0.00474505
FUT11	485.215	1.84215	0.0998151	18.4556	4.70316e-76	3.19246e-74
PTK6	23.8659	1.84031	0.430953	4.27034	1.95178e-05	7.48393e-05
PGM1	1146.15	1.83825	0.0669412	27.4607	5.18357e-166	1.31302e-163
SNPH	14.4028	1.83682	0.532376	3.45023	0.000560118	0.00175611
RIPOR3	12.5828	1.8341	0.58314	3.14522	0.00165962	0.00482664
IL23A	22.252	1.8332	0.436126	4.20338	2.62963e-05	9.90446e-05
C16orf74	36.5791	1.83207	0.33656	5.44352	5.22388e-08	2.6247e-07
PDK3	278.643	1.82997	0.123743	14.7884	1.7399e-49	5.68231e-48
TMEM45A	200.828	1.82812	0.149384	12.2377	1.95462e-34	4.02772e-33
ADGRD1	20.6838	1.82802	0.450152	4.0609	4.88839e-05	0.000178385
FAM171A2	37.2508	1.82638	0.332298	5.4962	3.88065e-08	1.97416e-07
MAPK8IP2	131.31	1.82624	0.184986	9.87229	5.48955e-23	7.08661e-22
LRRC15	8.7287	1.82611	0.699208	2.61169	0.00900968	0.0228498
CAPN8	444.686	1.82437	0.103238	17.6715	6.95273e-70	3.84083e-68
STRA6	10.1307	1.82034	0.640377	2.8426	0.0044747	0.0120597
HK1	1199.56	1.8198	0.0668875	27.2069	5.38465e-163	1.27096e-160
ALS2CL	435.753	1.81755	0.100829	18.026	1.21756e-72	7.39473e-71
LUM	14.7582	1.8092	0.53051	3.41029	0.000648928	0.00201418
ACE	38.4822	1.80747	0.33574	5.38354	7.30341e-08	3.61964e-07
ULK1	777.257	1.80617	0.0785004	23.0084	3.8418e-117	5.50332e-115
APOL1	13.4114	1.80541	0.552542	3.26746	0.00108519	0.00324229
GDF15	650.653	1.80303	0.0928836	19.4117	6.14375e-84	4.76164e-82
HPN	275.537	1.79984	0.136344	13.2007	8.6916e-40	2.12392e-38
HYAL3	295.804	1.79692	0.121132	14.8344	8.77917e-50	2.92231e-48
DUSP9	258.899	1.79016	0.127784	14.0093	1.36757e-44	3.92887e-43
NCF2	32.4763	1.78773	0.360608	4.95753	7.1394e-07	3.2084e-06
SEMA3G	8.47527	1.78558	0.736838	2.4233	0.0153804	0.0371127
LAMP3	90.8778	1.78469	0.212722	8.38976	4.87116e-17	4.60322e-16
ICAM5	52.748	1.78281	0.298435	5.97385	2.31724e-09	1.30827e-08
MMP17	16.2424	1.78252	0.495317	3.59875	0.000319748	0.00103838
KPNA7	10.8016	1.77958	0.617263	2.88302	0.00393879	0.0107464
FYN	92.9935	1.77758	0.217002	8.19154	2.57909e-16	2.33931e-15
SCX	14.75	1.77716	0.529979	3.35327	0.000798617	0.00244122
TXNIP	1859.29	1.77654	0.0574584	30.9187	6.69478e-210	2.62372e-207
SLC15A1	420.051	1.77393	0.103481	17.1426	7.13606e-66	3.64185e-64
DSE	12.3221	1.77385	0.586869	3.02256	0.00250645	0.00705918
ADM2	375.532	1.77145	0.111345	15.9095	5.44755e-57	2.27576e-55
TFF1	109.655	1.76582	0.196692	8.97758	2.7678e-19	2.96952e-18
ITGA5	952.429	1.76274	0.0754243	23.3709	8.44131e-121	1.28922e-118
CDKL2	32.4596	1.7623	0.363861	4.84335	1.27671e-06	5.59934e-06
CGB7	7.68866	1.7604	0.740548	2.37715	0.0174469	0.0415823
DHDH	45.0434	1.7597	0.307645	5.7199	1.06587e-08	5.72218e-08
EXPH5	360.762	1.75544	0.113751	15.4323	9.92945e-54	3.72283e-52
AP003071.5	29.9677	1.75539	0.389262	4.50954	6.49697e-06	2.61782e-05
SCEL	380.804	1.75409	0.106928	16.4043	1.78192e-60	7.994e-59
TESK2	248.397	1.75387	0.142019	12.3495	4.90241e-35	1.02857e-33
ESR2	10.5808	1.75321	0.641558	2.73274	0.00628103	0.0164685
STC2	5707.94	1.7512	0.0376335	46.533	0	0
MKRN2OS	21.9532	1.74535	0.427024	4.08723	4.36548e-05	0.000160147
LIMCH1	484.414	1.74524	0.0951228	18.3472	3.47584e-75	2.3066e-73
SHISA4	9.02053	1.74381	0.672137	2.59443	0.00947482	0.023933
AZIN2	20.5119	1.74232	0.445888	3.90753	9.32449e-05	0.000327548
SERPINI1	89.8193	1.73243	0.219087	7.90749	2.62633e-15	2.24862e-14
FAM156A	9.86337	1.73089	0.651218	2.65793	0.0078622	0.0202412
GLIPR2	49.4988	1.72971	0.305031	5.67061	1.42289e-08	7.52414e-08
PTPRE	50.2787	1.72802	0.283712	6.09074	1.12389e-09	6.50619e-09
PITPNC1	39.0104	1.72766	0.323746	5.33648	9.47707e-08	4.64923e-07
RPS6KA2	57.6703	1.72673	0.264633	6.525	6.80001e-11	4.37556e-10
ZNF385C	42.8459	1.72589	0.308045	5.60272	2.1101e-08	1.09874e-07
TMEM121B	34.3277	1.72263	0.370271	4.65236	3.28161e-06	1.37341e-05
ERFE	25.4635	1.72104	0.40759	4.22247	2.41636e-05	9.15212e-05
MLPH	11.8666	1.72021	0.589064	2.92024	0.00349763	0.0096288
LYPD5	11.9536	1.71993	0.575751	2.98728	0.00281468	0.00786755
CCN3	8.99706	1.71496	0.66685	2.57174	0.010119	0.0253721
TMEM86A	12.6482	1.71409	0.55829	3.07025	0.00213882	0.00610071
MTTP	19.9525	1.71029	0.461182	3.7085	0.000208493	0.000696238
KRT15	214.19	1.70988	0.144693	11.8173	3.17909e-32	6.08039e-31
SLC25A34	23.1985	1.70951	0.419895	4.07128	4.6756e-05	0.00017098
MAFF	548.883	1.70936	0.101242	16.8838	5.91925e-64	2.89973e-62
GBP3	25.0504	1.70918	0.412175	4.14674	3.37237e-05	0.000125488
SLC16A4	214.841	1.70848	0.138506	12.3351	5.86413e-35	1.22786e-33
SPTB	146.168	1.70803	0.168317	10.1477	3.39261e-24	4.62691e-23
TIMP1	11.2157	1.70193	0.612911	2.7768	0.00548973	0.0145517
MUC1	16.3405	1.69988	0.493575	3.44401	0.000573157	0.00179428
ALOXE3	21.2286	1.69984	0.438508	3.87643	0.000106002	0.000369797
KIF26A	208.987	1.69973	0.13974	12.1636	4.85967e-34	9.92529e-33
ITGB6	45.8623	1.69901	0.304963	5.57119	2.53003e-08	1.30952e-07
FUT9	8.19637	1.69877	0.714975	2.37598	0.0175023	0.0416945
LOXL2	50.8274	1.69819	0.279226	6.08179	1.18849e-09	6.86107e-09
CREBRF	320.897	1.69747	0.122221	13.8886	7.4281e-44	2.07657e-42
UPK2	94.049	1.69441	0.207816	8.15342	3.53778e-16	3.18247e-15
IGFBP2	86.554	1.69133	0.216107	7.82637	5.02142e-15	4.22267e-14
ACER2	46.3682	1.68589	0.298041	5.65657	1.5443e-08	8.13924e-08
CCRL2	50.9485	1.68432	0.287285	5.86288	4.54894e-09	2.5136e-08
MAB21L3	9.55496	1.68173	0.648422	2.59358	0.00949837	0.0239849
CALCOCO1	560.119	1.68077	0.0919509	18.279	1.21592e-74	7.79504e-73
PXDN	19.0449	1.67747	0.462556	3.62652	0.000287265	0.000939948
MAFB	13.9523	1.67469	0.534064	3.13575	0.00171415	0.00497272
HDAC5	692.837	1.67162	0.0835644	20.004	5.08566e-89	4.41985e-87
TAP1	100.781	1.67099	0.201043	8.31157	9.4447e-17	8.77744e-16
AKAP7	141.006	1.66921	0.170796	9.77316	1.46795e-22	1.84939e-21
ISM2	316.848	1.66907	0.11793	14.1531	1.78694e-45	5.2948e-44
HK2	3209.68	1.668	0.0449064	37.1439	5.49802e-302	4.39228e-299
TP53INP1	198.147	1.66776	0.149554	11.1516	7.03308e-29	1.16494e-27
ARHGAP42	659.689	1.66489	0.0880326	18.9122	9.05561e-80	6.5538e-78
IL10RA	22.6433	1.66258	0.424423	3.91727	8.95557e-05	0.000315068
PTPRB	39.8811	1.66144	0.31744	5.23389	1.65977e-07	7.95825e-07
MT2A	60.0917	1.66131	0.281598	5.89958	3.64423e-09	2.02716e-08
EPHX4	15.273	1.65856	0.531614	3.11986	0.00180939	0.0052271
HBA1	9.41444	1.65731	0.652349	2.54053	0.0110686	0.0275269
MAP3K15	39.0549	1.65619	0.323064	5.12652	2.95141e-07	1.38103e-06
KIF5A	10.2664	1.65435	0.631248	2.62077	0.00877324	0.0223183
ADGRF4	839.88	1.6539	0.0730454	22.642	1.67104e-113	2.22495e-111
LGALS9	25.8754	1.65315	0.405234	4.0795	4.51334e-05	0.000165367
B3GNT4	58.6928	1.65129	0.265035	6.23043	4.65144e-10	2.78109e-09
PGK1	25722	1.65058	0.0310629	53.1368	0	0
ADAMTS9	535.714	1.6493	0.0921787	17.8924	1.35175e-71	7.93139e-70
HERPUD1	3920.88	1.64872	0.041161	40.0554	0	0
RETREG1	341.462	1.63907	0.110507	14.8322	9.06831e-50	3.01372e-48
SLC26A3	11.3826	1.63716	0.607416	2.69529	0.00703281	0.0182804
CAV1	139.801	1.63531	0.173843	9.40683	5.11313e-21	5.95653e-20
NRXN2	35.2781	1.63478	0.346749	4.7146	2.42182e-06	1.0287e-05
TRIB2	10.0023	1.63369	0.6441	2.5364	0.0111999	0.0278203
DIRAS1	12.9742	1.63348	0.552046	2.95896	0.0030868	0.0085682
ZNF438	12.1639	1.63304	0.567033	2.87997	0.00397709	0.0108381
SHISA8	14.8729	1.63271	0.512259	3.18728	0.00143618	0.00422116
FHDC1	76.5133	1.63235	0.231534	7.05012	1.78759e-12	1.28658e-11
SH3PXD2A	286.426	1.62933	0.120103	13.566	6.36895e-42	1.68521e-40
ZSWIM5	36.5164	1.62908	0.350086	4.65336	3.26565e-06	1.36728e-05
CSPG5	32.6404	1.62814	0.350645	4.64327	3.42935e-06	1.43149e-05
DOK3	217.542	1.62778	0.139233	11.691	1.41685e-31	2.64652e-30
TMEM74B	49.5113	1.6271	0.29475	5.52029	3.38435e-08	1.73058e-07
TNFSF15	26.9504	1.62525	0.382712	4.24668	2.16962e-05	8.26886e-05
BTBD19	22.742	1.62503	0.445037	3.65145	0.000260768	0.000857704
GCNT3	234.224	1.62388	0.133177	12.1934	3.37257e-34	6.90163e-33
DMXL2	188.915	1.62356	0.158395	10.2501	1.182e-24	1.65217e-23
PALM	285.57	1.62304	0.12398	13.0911	3.70041e-39	8.76411e-38
PAPSS2	179.914	1.6219	0.149461	10.8516	1.95862e-27	3.06806e-26
CA8	14.8578	1.62189	0.52396	3.09545	0.00196513	0.00564013
CCL28	218.074	1.62172	0.144682	11.2089	3.6893e-29	6.21495e-28
VWA5A	17.8227	1.62162	0.482274	3.36244	0.000772563	0.0023661
HECA	170.709	1.62062	0.155692	10.4091	2.25229e-25	3.24878e-24
PDCD4	896.907	1.61482	0.0828371	19.4939	1.23665e-84	9.76674e-83
NKAIN4	36.8243	1.61479	0.327442	4.93154	8.15833e-07	3.6458e-06
RRAD	29.7226	1.61394	0.368413	4.38078	1.18253e-05	4.63264e-05
SH3TC1	297.289	1.61039	0.121919	13.2086	7.82513e-40	1.91444e-38
INHBE	35.634	1.60964	0.350099	4.59768	4.2723e-06	1.75932e-05
ARFGEF3	542.359	1.60865	0.0960577	16.7467	5.98455e-63	2.85103e-61
AFAP1L2	161.75	1.60643	0.157997	10.1675	2.76881e-24	3.7986e-23
PEAR1	13.4151	1.60576	0.535703	2.99747	0.00272226	0.00763255
PHF24	9.81348	1.60345	0.63566	2.5225	0.0116523	0.0288165
B3GNT7	91.7463	1.60255	0.216169	7.41342	1.23081e-13	9.58217e-13
NOTCH1	276.239	1.60167	0.127525	12.5596	3.51911e-36	7.61411e-35
KIF3C	544.975	1.60163	0.0891644	17.9627	3.81855e-72	2.26615e-70
IRF5	32.9325	1.60132	0.348171	4.59923	4.24053e-06	1.74773e-05
MCAM	542.768	1.60114	0.0897794	17.8342	3.83594e-71	2.21323e-69
OSBPL6	20.9217	1.60039	0.431638	3.70772	0.000209137	0.000698278
HCN4	9.85578	1.59557	0.626203	2.54801	0.010834	0.0269986
PLAGL1	9.04076	1.59375	0.664646	2.39789	0.0164898	0.0395462
CLMN	229.754	1.59371	0.136324	11.6906	1.42376e-31	2.65705e-30
SH3D21	421.678	1.59219	0.10189	15.6266	4.79806e-55	1.88394e-53
BIN2	11.8446	1.58933	0.603531	2.63339	0.00845377	0.0216003
SLC9A5	38.8644	1.58907	0.317166	5.01021	5.43698e-07	2.47115e-06
SOCS3	280.118	1.58846	0.12679	12.5283	5.22841e-36	1.12538e-34
CLIC5	1748.12	1.58744	0.0539827	29.4064	4.5445e-190	1.49831e-187
ITGA10	9.16903	1.58736	0.658182	2.41173	0.015877	0.0382178
LRRC3	251.329	1.5872	0.127069	12.4908	8.37582e-36	1.78986e-34
SETBP1	100.026	1.58517	0.206719	7.66824	1.74374e-14	1.42203e-13
ZSWIM4	40.3963	1.58285	0.321988	4.91588	8.83827e-07	3.9361e-06
DUSP10	29.0916	1.58148	0.382237	4.13742	3.51238e-05	0.000130394
FOS	180.918	1.57826	0.149003	10.5922	3.24013e-26	4.8072e-25
DDIT4L	16.7231	1.57804	0.484545	3.25675	0.00112695	0.00336078
RAB3A	30.6207	1.57408	0.358151	4.39501	1.10768e-05	4.35254e-05
EPHB1	12.6282	1.57333	0.573087	2.74536	0.00604453	0.0159026
WNT2B	14.4589	1.57324	0.516325	3.047	0.00231139	0.00655514
SH2B2	116.194	1.57056	0.188613	8.32686	8.30152e-17	7.74622e-16
TM6SF2	10.8982	1.56875	0.609315	2.57461	0.0100354	0.0251806
PAM	2936.45	1.5683	0.0461236	34.0021	2.07194e-253	1.16314e-250
FXYD5	393.968	1.56748	0.103728	15.1114	1.36121e-51	4.77597e-50
MORN3	622.143	1.56656	0.0863688	18.1381	1.59508e-73	9.91958e-72
SLC30A4	16.4849	1.56573	0.484826	3.22946	0.00124025	0.00368809
GABBR2	18.3598	1.56534	0.473575	3.30538	0.000948491	0.00286228
AC112128.1	10.9732	1.56459	0.591756	2.64398	0.00819368	0.0210035
TMEM159	291.445	1.56446	0.122957	12.7236	4.37136e-37	9.77367e-36
GPR157	420.133	1.56281	0.103074	15.162	6.3137e-52	2.2341e-50
PDGFRL	64.7148	1.56163	0.248909	6.27391	3.52101e-10	2.13221e-09
SCUBE3	99.8547	1.55711	0.198556	7.84216	4.42861e-15	3.73929e-14
SHH	91.3559	1.55473	0.212754	7.30762	2.71925e-13	2.06968e-12
LHX5	9.697	1.55462	0.637139	2.44	0.0146874	0.0355809
CHPF	1334.95	1.55421	0.0691477	22.4766	7.02549e-112	9.0078e-110
TNFAIP8	358.937	1.55309	0.112564	13.7974	2.64281e-43	7.2324e-42
PLAAT2	26.7053	1.55189	0.379199	4.09256	4.26634e-05	0.000156704
HBP1	565.731	1.55163	0.0870165	17.8315	4.02671e-71	2.31687e-69
INTS6L	10.21	1.55042	0.619117	2.50424	0.0122715	0.0302111
NYAP1	68.3877	1.55003	0.241313	6.42333	1.33325e-10	8.35633e-10
RILP	329.448	1.54952	0.112912	13.7233	7.36159e-43	2.00403e-41
LPIN1	803.198	1.54881	0.0746971	20.7346	1.68877e-95	1.63913e-93
ZCCHC18	15.0013	1.54796	0.50393	3.07177	0.00212796	0.00607141
QRICH2	31.4509	1.5477	0.353177	4.38222	1.17478e-05	4.60663e-05
DUSP4	635.74	1.54758	0.0870998	17.7679	1.25334e-70	7.09349e-69
HHLA2	35.4316	1.54716	0.33093	4.67518	2.93693e-06	1.23413e-05
AKAP12	113.726	1.54559	0.191712	8.06207	7.50129e-16	6.60488e-15
ABCA5	133.632	1.54194	0.177862	8.66929	4.3481e-18	4.38206e-17
SERPINB8	56.1611	1.54078	0.264567	5.82378	5.75308e-09	3.14798e-08
TMEM92	443.043	1.54014	0.0992915	15.5113	2.91131e-54	1.1116e-52
GABARAPL1	3356.54	1.53687	0.0457539	33.5898	2.3608e-247	1.2259e-244
FANK1	15.6627	1.53663	0.492741	3.11854	0.00181749	0.00524684
IFI27	13.0093	1.53513	0.57013	2.69259	0.00708987	0.0184195
SMAD9	8.92217	1.53492	0.665594	2.30609	0.0211056	0.0493342
MIB2	350.903	1.53315	0.112667	13.6078	3.59956e-42	9.62245e-41
TRIQK	17.568	1.53182	0.464192	3.29997	0.000966949	0.00291291
CEACAM1	1042.63	1.52964	0.0712892	21.4569	3.93921e-102	4.39899e-100
PEX11A	176.5	1.52459	0.151571	10.0586	8.41638e-24	1.12422e-22
SEMA6C	70.3111	1.52455	0.237234	6.42636	1.307e-10	8.20417e-10
PBX4	71.5669	1.52415	0.234666	6.49496	8.30563e-11	5.30656e-10
VASN	145.88	1.52166	0.169513	8.97666	2.7911e-19	2.99298e-18
SLCO4C1	31.0835	1.52114	0.405523	3.75106	0.00017609	0.000595307
KCNK6	601.722	1.52095	0.089159	17.0588	3.00468e-65	1.5185e-63
KLHL29	19.4524	1.52076	0.461712	3.29374	0.000988649	0.00297267
ZC3H12D	56.5706	1.52039	0.286278	5.31088	1.09096e-07	5.32431e-07
PADI2	15.4234	1.51711	0.496979	3.05266	0.00226819	0.00643879
GFOD1	23.4326	1.51707	0.404321	3.75214	0.00017533	0.000593026
RASGEF1A	26.3605	1.51673	0.403321	3.7606	0.000169506	0.000574262
IFIT3	59.2114	1.51621	0.255214	5.94095	2.83372e-09	1.59122e-08
KCNH2	17.478	1.51586	0.481204	3.15014	0.00163191	0.00475204
NFATC1	20.4946	1.51555	0.45723	3.31464	0.00091761	0.00277636
PHEX	24.0442	1.51493	0.405631	3.73475	0.000187902	0.000631744
TSPAN33	22.0854	1.51145	0.421899	3.5825	0.000340322	0.00110126
MXD4	349.272	1.51118	0.110124	13.7226	7.43756e-43	2.02206e-41
CDKN1C	41.9091	1.50982	0.306835	4.92064	8.62624e-07	3.84662e-06
IFIT1	21.3828	1.50958	0.428346	3.52422	0.000424734	0.00135976
AC093512.2	23.9667	1.50696	0.436679	3.45095	0.000558622	0.00175168
SYNGR3	101.273	1.50623	0.197804	7.61478	2.64131e-14	2.13307e-13
DTNA	148.949	1.50512	0.163767	9.19062	3.90578e-20	4.37814e-19
FOXO4	454.558	1.50409	0.0972114	15.4724	5.33039e-54	2.02039e-52
OAS1	285.997	1.50368	0.119004	12.6356	1.3437e-36	2.94408e-35
PRODH	293.979	1.50343	0.118234	12.7157	4.8381e-37	1.07709e-35
NOS1AP	48.518	1.50319	0.292359	5.1416	2.72405e-07	1.28041e-06
SDC3	170.583	1.50244	0.155482	9.66312	4.32482e-22	5.35345e-21
RIMKLB	18.5198	1.50194	0.47418	3.16746	0.00153777	0.00450001
PRSS36	32.8619	1.50051	0.350868	4.27657	1.89795e-05	7.28154e-05
LGALS4	12.7527	1.4999	0.559092	2.68275	0.00730188	0.0189064
EPOR	126.491	1.49881	0.191974	7.80736	5.8398e-15	4.89107e-14
NFKBID	150.138	1.49873	0.163904	9.14396	6.02084e-20	6.66981e-19
AIFM3	11.2881	1.49714	0.579277	2.5845	0.0097521	0.0245439
CREB3L3	97.6913	1.49398	0.206496	7.23494	4.6572e-13	3.49602e-12
DYSF	61.3045	1.49369	0.25557	5.84454	5.07963e-09	2.79346e-08
BAAT	16.4695	1.49278	0.490547	3.04309	0.00234161	0.00662999
PAQR5	126.948	1.48978	0.178202	8.36008	6.26774e-17	5.89082e-16
FNIP2	558.032	1.48544	0.0893975	16.6162	5.32169e-62	2.47286e-60
SHANK3	240.534	1.48544	0.129998	11.4267	3.07592e-30	5.47002e-29
AQP3	842.546	1.4838	0.07642	19.4163	5.61583e-84	4.36878e-82
SLC52A3	20.5579	1.48315	0.438705	3.38075	0.000722884	0.00222421
DMPK	166.887	1.48141	0.165444	8.95411	3.42502e-19	3.66141e-18
IFFO1	15.8853	1.48099	0.507704	2.91703	0.00353383	0.00972072
LNPK	620.873	1.48094	0.0882287	16.7852	3.13034e-63	1.50162e-61
DNAJB9	541.103	1.48048	0.0922093	16.0556	5.21972e-58	2.23084e-56
NATD1	671.474	1.47606	0.0807074	18.289	1.01237e-74	6.51019e-73
SLC8A2	31.5012	1.47069	0.359156	4.09485	4.22451e-05	0.000155305
SESN2	511.448	1.46989	0.0900714	16.3191	7.21365e-60	3.21534e-58
ACP7	15.7577	1.46833	0.496857	2.95524	0.00312425	0.00866405
KLF2	11.9408	1.46792	0.583687	2.51492	0.0119061	0.0293951
RAPGEF3	27.0112	1.46785	0.378305	3.88008	0.000104422	0.00036447
SEPTIN6	267.116	1.46732	0.122486	11.9795	4.55276e-33	8.93812e-32
TNXB	33.4438	1.46627	0.345962	4.23824	2.25283e-05	8.56711e-05
GNAZ	15.1374	1.46565	0.516537	2.83746	0.00454735	0.0122364
YPEL3	277.615	1.46401	0.122146	11.9858	4.21899e-33	8.29069e-32
GYS1	2218.84	1.46163	0.0504297	28.9835	1.06131e-184	3.39147e-182
BMT2	114.327	1.46088	0.1868	7.82053	5.26002e-15	4.41974e-14
ADCY10	23.3672	1.46043	0.406032	3.59684	0.000322104	0.00104571
SOWAHD	23.4793	1.45629	0.421562	3.45451	0.000551301	0.00173055
AJM1	64.3183	1.45579	0.243721	5.97319	2.32664e-09	1.31287e-08
ATP2A3	164.959	1.45475	0.154039	9.44409	3.58518e-21	4.22632e-20
WIPI1	318.274	1.45393	0.117173	12.4084	2.35186e-35	4.96447e-34
LDHA	36544	1.4528	0.0284265	51.1073	0	0
OSR2	85.2347	1.45188	0.216798	6.69693	2.12844e-11	1.422e-10
MEIS3	153.834	1.45145	0.158742	9.14342	6.05081e-20	6.69943e-19
NKD2	154.948	1.45078	0.162119	8.94889	3.5909e-19	3.83479e-18
PLB1	334.394	1.45064	0.110409	13.1387	1.97567e-39	4.76063e-38
LAMB3	6055.16	1.44963	0.0408528	35.4843	8.58038e-276	6.14562e-273
OVOL1	472.236	1.44782	0.0978391	14.798	1.50975e-49	4.94621e-48
B3GNT3	119.233	1.4476	0.193368	7.48627	7.08587e-14	5.61544e-13
PRR15L	505.387	1.44518	0.093587	15.4421	8.53174e-54	3.21038e-52
RASA3	98.6496	1.44319	0.207996	6.93857	3.961e-12	2.78234e-11
PCP2	11.7466	1.44317	0.581063	2.48368	0.0130034	0.031847
FBXO27	54.6159	1.44275	0.273757	5.27019	1.36285e-07	6.58318e-07
ANKRD6	125.453	1.43859	0.175463	8.1988	2.42802e-16	2.20614e-15
PLA2R1	15.0135	1.43712	0.516803	2.7808	0.00542259	0.0143939
CREB5	444.53	1.43708	0.0988194	14.5425	6.51449e-48	2.0533e-46
SLC25A29	386.305	1.4361	0.105807	13.5728	5.80411e-42	1.53968e-40
B4GALNT4	457.372	1.43554	0.0969123	14.8128	1.21113e-49	3.98044e-48
SLC6A9	319.046	1.43192	0.117958	12.1392	6.54312e-34	1.32722e-32
NARF	1318.01	1.43163	0.0607103	23.5813	5.99258e-123	9.28895e-121
NPR1	54.1344	1.43155	0.275316	5.19967	1.9964e-07	9.51082e-07
ROBO3	32.1361	1.43122	0.346372	4.13203	3.5957e-05	0.000133321
CRISPLD2	99.1346	1.43009	0.205446	6.96088	3.38147e-12	2.389e-11
KIAA1549L	10.8325	1.42962	0.595335	2.40137	0.016334	0.0392213
AKR1C1	275.407	1.42931	0.122365	11.6807	1.60006e-31	2.9807e-30
FOXD1	24.9979	1.42641	0.390183	3.65575	0.000256432	0.000844379
FAM114A1	454.363	1.42586	0.0974911	14.6255	1.93024e-48	6.14925e-47
BTG1	712.853	1.42525	0.0791264	18.0123	1.56116e-72	9.4539e-71
PCSK9	2350.62	1.42513	0.0516624	27.5855	1.66101e-167	4.25937e-165
CRABP2	249.011	1.42472	0.128523	11.0853	1.47835e-28	2.41027e-27
RIT1	602.304	1.42362	0.0930887	15.2932	8.49378e-53	3.12256e-51
GATA2	383.246	1.42245	0.102817	13.8348	1.57256e-43	4.33615e-42
PDE10A	120.345	1.42232	0.184768	7.69788	1.38347e-14	1.13358e-13
KRT80	23.0301	1.42169	0.405688	3.50441	0.000457626	0.0014581
VWA7	21.1093	1.42003	0.427756	3.31971	0.000901098	0.00273117
VEGFA	4386.16	1.41952	0.0412502	34.4125	1.64198e-259	1.0658e-256
SPRN	15.459	1.41807	0.501337	2.82858	0.00467551	0.0125472
LAMC2	10516.7	1.41796	0.0354503	39.9986	0	0
ELK3	21.0103	1.4166	0.422914	3.34963	0.000809205	0.0024714
ZIC2	28.6322	1.41414	0.363217	3.89337	9.88593e-05	0.000345983
ARHGEF4	42.0486	1.41361	0.30028	4.70765	2.50593e-06	1.06183e-05
KIAA0513	192.192	1.41333	0.15788	8.95193	3.4931e-19	3.73226e-18
ALPK3	20.2961	1.41224	0.444639	3.17614	0.00149246	0.00437445
MARCHF3	16.571	1.41149	0.475976	2.96548	0.00302216	0.00840001
C22orf23	15.3143	1.41122	0.502029	2.81103	0.00493829	0.0131961
N4BP3	474.53	1.40947	0.0934249	15.0866	1.98354e-51	6.91276e-50
GRAMD2A	30.4817	1.40933	0.358664	3.9294	8.51565e-05	0.00030066
VWDE	11.479	1.40929	0.571293	2.46684	0.0136312	0.0332317
N4BP2L1	67.2679	1.40662	0.25673	5.47897	4.278e-08	2.1678e-07
PLEKHM3	340.85	1.40249	0.109337	12.8273	1.15303e-37	2.63183e-36
FAM162A	1195.38	1.40104	0.0691448	20.2624	2.76382e-91	2.51786e-89
ETS1	786.968	1.39985	0.0824122	16.9859	1.0443e-64	5.18928e-63
TFAP2C	727.002	1.39935	0.0789456	17.7254	2.66843e-70	1.48994e-68
PPP2R5B	413.412	1.399	0.104357	13.4059	5.58126e-41	1.42945e-39
IFIT5	26.0295	1.39573	0.391047	3.5692	0.000358067	0.00115649
CAPN5	596.55	1.39497	0.0917266	15.2079	3.13516e-52	1.12277e-50
FAM117B	243.62	1.39456	0.126822	10.9962	3.98767e-28	6.38119e-27
PNPLA2	959.24	1.39315	0.0671753	20.739	1.54041e-95	1.50215e-93
ATP6V1C2	80.4632	1.39043	0.219336	6.33925	2.30886e-10	1.42011e-09
ZBED2	34.0817	1.38774	0.332208	4.17731	2.94972e-05	0.000110394
PTPRH	116.55	1.38772	0.189295	7.331	2.28449e-13	1.74903e-12
EFNA1	743.993	1.38772	0.0785204	17.6733	6.72965e-70	3.72751e-68
F2R	341.653	1.38657	0.111444	12.4419	1.5487e-35	3.2791e-34
MTRNR2L1	38.6469	1.38463	0.328626	4.21339	2.5157e-05	9.50067e-05
CCDC69	191.644	1.38337	0.157213	8.79932	1.37647e-18	1.43025e-17
NPNT	1639.46	1.38315	0.0545984	25.3332	1.3768e-141	2.62363e-139
AP000944.5	18.8247	1.38283	0.44651	3.09697	0.00195508	0.00561362
PRSS53	47.6196	1.38266	0.282659	4.8916	1.00019e-06	4.43718e-06
RTL5	105.773	1.38099	0.214078	6.45089	1.11197e-10	7.02455e-10
MSMB	18.1559	1.37879	0.45392	3.03751	0.00238542	0.00674851
GBP2	21.2498	1.37854	0.419637	3.28507	0.00101958	0.00305861
BIRC3	596.78	1.37787	0.0886914	15.5356	1.99262e-54	7.63629e-53
HILPDA	355.426	1.37778	0.10862	12.6844	7.21751e-37	1.59654e-35
SDCBP2	44.8705	1.37648	0.296816	4.63748	3.52677e-06	1.47068e-05
MYO7B	19.4669	1.37613	0.444747	3.09419	0.00197354	0.00566115
KDM4B	1049.93	1.3747	0.0670335	20.5076	1.84198e-93	1.73908e-91
ACKR3	65.097	1.37364	0.241243	5.69401	1.24093e-08	6.61587e-08
TIMP2	1774.45	1.37134	0.0529718	25.8881	9.06314e-148	1.88251e-145
MAPRE3	153.95	1.36999	0.165849	8.26048	1.45084e-16	1.33698e-15
JUNB	293.411	1.36942	0.121761	11.2468	2.40229e-29	4.07997e-28
ACSS2	2873.63	1.36808	0.0444445	30.7817	4.61044e-208	1.7734e-205
FBXL20	154.047	1.36702	0.162041	8.43627	3.27636e-17	3.12745e-16
QSOX1	804.436	1.36521	0.0768431	17.7663	1.29011e-70	7.28177e-69
C4orf3	1303.96	1.365	0.0613304	22.2566	9.74114e-110	1.21887e-107
GPRC5A	11037.4	1.36424	0.0408302	33.4125	9.03131e-245	4.46641e-242
PTP4A3	61.7581	1.36402	0.251686	5.41953	5.97563e-08	2.9894e-07
COL6A2	162.633	1.36304	0.15707	8.67789	4.03173e-18	4.07311e-17
UBALD2	457.862	1.36273	0.102198	13.3343	1.46241e-40	3.65532e-39
ALDOA	572.113	1.36273	0.0873494	15.6009	7.18091e-55	2.80366e-53
C6orf163	16.1831	1.36247	0.490065	2.78018	0.00543282	0.0144156
LIPH	301.815	1.36236	0.114779	11.8694	1.70681e-32	3.30094e-31
RAB40B	84.8769	1.35796	0.211785	6.41197	1.4365e-10	8.96292e-10
BTN3A2	82.6026	1.35705	0.215419	6.29961	2.98387e-10	1.82181e-09
TRIM9	146.38	1.35496	0.162521	8.3371	7.61344e-17	7.12658e-16
RIOK3	978.163	1.35414	0.0672286	20.1423	3.14368e-90	2.81454e-88
GSDMB	215.764	1.35031	0.136855	9.86672	5.80294e-23	7.46333e-22
ZNF654	330.194	1.34898	0.110999	12.1531	5.52089e-34	1.12316e-32
STARD9	54.2163	1.34789	0.265897	5.06923	3.99437e-07	1.84255e-06
PBXIP1	686.542	1.34777	0.0869624	15.4983	3.56042e-54	1.35198e-52
FAM161B	51.7726	1.34773	0.274577	4.90838	9.18334e-07	4.08365e-06
SP100	110.381	1.34771	0.185621	7.26057	3.85449e-13	2.90921e-12
MICALL2	318.497	1.34694	0.114389	11.7751	5.24648e-32	9.97023e-31
VIPR1	76.8878	1.3447	0.233474	5.75953	8.43474e-09	4.56245e-08
LSMEM1	28.5119	1.34329	0.372504	3.60612	0.000310813	0.00101142
ORAI3	27.9287	1.34045	0.387821	3.45635	0.000547535	0.00172003
NFIX	20.1298	1.33853	0.431082	3.10503	0.00190257	0.00547193
RASGRP2	49.6287	1.33759	0.273702	4.88703	1.02367e-06	4.53363e-06
RCBTB2	50.5866	1.33731	0.279233	4.78922	1.67435e-06	7.24236e-06
ATP8B2	274.698	1.33658	0.118394	11.2893	1.48215e-29	2.55696e-28
EFNB3	147.136	1.33639	0.160051	8.34977	6.83979e-17	6.41686e-16
SP6	999.635	1.33582	0.0699821	19.088	3.17526e-81	2.37242e-79
MGLL	679.562	1.33519	0.0857823	15.5648	1.26173e-54	4.88034e-53
LIPA	1961.09	1.3329	0.0594625	22.4157	2.7656e-111	3.50269e-109
ZNF160	931.222	1.33273	0.072919	18.2769	1.2641e-74	8.02955e-73
ANG	74.5089	1.33223	0.230799	5.77226	7.82163e-09	4.24407e-08
CHRD	157.433	1.3321	0.159648	8.34396	7.1842e-17	6.73693e-16
STXBP1	97.895	1.33073	0.19809	6.71781	1.84481e-11	1.23968e-10
RAP1GAP	292.75	1.33012	0.116781	11.3899	4.69686e-30	8.28875e-29
BACE2	18.854	1.3293	0.453941	2.92834	0.00340774	0.00939379
RAB11FIP5	1064.58	1.32797	0.0644717	20.5978	2.8727e-94	2.7371e-92
LRP11	36.4575	1.32786	0.322924	4.11198	3.9228e-05	0.000144777
DOCK11	89.5267	1.32771	0.206806	6.42005	1.36228e-10	8.52287e-10
LHX2	58.1802	1.3256	0.259986	5.09873	3.41947e-07	1.58788e-06
RTN4R	326.127	1.3243	0.109575	12.0858	1.25531e-33	2.51679e-32
WSB1	4555.16	1.3237	0.0388373	34.0832	1.3101e-254	7.77486e-252
PLAC8	116.15	1.32288	0.183211	7.22051	5.1794e-13	3.86983e-12
ZNF350	48.9084	1.32234	0.28214	4.68683	2.77476e-06	1.16977e-05
RIMKLA	615.535	1.31947	0.0854367	15.4439	8.29646e-54	3.12751e-52
ADAM8	192.769	1.31799	0.146366	9.00471	2.16234e-19	2.33077e-18
ZNF836	64.953	1.31566	0.258598	5.08766	3.62503e-07	1.67995e-06
FZD4	1390.67	1.31435	0.0674601	19.4833	1.52088e-84	1.1966e-82
ZNF292	1506.16	1.31431	0.073377	17.9117	9.55929e-72	5.62481e-70
IQCN	20.1032	1.31342	0.434431	3.02331	0.00250025	0.00704363
CARD9	41.5712	1.31283	0.314036	4.1805	2.9087e-05	0.000108937
DAPK1	1351.18	1.31136	0.0592051	22.1495	1.05462e-108	1.29619e-106
EPHB3	133.353	1.31106	0.168122	7.79828	6.27566e-15	5.24132e-14
ABTB2	506.523	1.30932	0.0928782	14.0971	3.9554e-45	1.15715e-43
TLE6	25.2929	1.309	0.382386	3.42323	0.000618817	0.00192763
EPPK1	499.219	1.30865	0.0999112	13.0982	3.37378e-39	8.01794e-38
ZFYVE1	344.339	1.30752	0.109785	11.9097	1.05299e-32	2.04026e-31
NUPR1	20.0206	1.30639	0.432424	3.02109	0.00251865	0.00709066
NTN1	56.3122	1.30579	0.26612	4.90676	9.25919e-07	4.1165e-06
LZTS3	405.412	1.30567	0.102591	12.727	4.18737e-37	9.39264e-36
TMEM154	21.4701	1.30521	0.428638	3.04502	0.00232661	0.00659292
SSTR2	28.8181	1.30067	0.37023	3.51314	0.000442844	0.00141404
SPATA6	22.2063	1.30064	0.407197	3.19413	0.00140252	0.00413158
STAMBPL1	21.6627	1.30034	0.417041	3.11801	0.00182077	0.00525383
BBC3	120.744	1.30008	0.179661	7.23629	4.6111e-13	3.46391e-12
BRICD5	88.4393	1.29994	0.207336	6.26974	3.6166e-10	2.18818e-09
TNFRSF25	124.343	1.29987	0.188835	6.88363	5.83462e-12	4.04914e-11
ZNF577	125.125	1.29899	0.173449	7.48915	6.9323e-14	5.49583e-13
TMTC2	12.0519	1.29484	0.552803	2.34232	0.0191641	0.0452749
ANKRD35	19.1687	1.29448	0.450824	2.87137	0.00408694	0.0111011
DUOXA2	46.9822	1.29316	0.283474	4.56182	5.07121e-06	2.06943e-05
MTHFD2	4845.01	1.29194	0.0402859	32.0692	1.18446e-225	5.23456e-223
ISG15	459.957	1.29142	0.0935516	13.8044	2.39738e-43	6.57808e-42
RHOF	85.9483	1.29055	0.209853	6.14981	7.75752e-10	4.55174e-09
TRAPPC2B	31.012	1.29054	0.349158	3.69615	0.000218895	0.000728283
TSPYL2	1505.21	1.29004	0.0675615	19.0943	2.81575e-81	2.1114e-79
GRAMD1C	43.2587	1.28918	0.302616	4.26012	2.04315e-05	7.81984e-05
HOXA13	54.5497	1.28809	0.261755	4.92096	8.61204e-07	3.84111e-06
MST1	109.878	1.28729	0.203203	6.33497	2.37384e-10	1.45749e-09
ARHGAP45	1607.3	1.28544	0.0597476	21.5145	1.13955e-102	1.28639e-100
NR4A1	699.111	1.28475	0.0764908	16.7961	2.60471e-63	1.25237e-61
C1orf226	132.834	1.28319	0.168933	7.59582	3.05838e-14	2.46415e-13
KDM7A	204.892	1.28248	0.140974	9.09728	9.26224e-20	1.01953e-18
RADX	85.8635	1.28243	0.209388	6.12466	9.0879e-10	5.30329e-09
ALPG	84.8352	1.28165	0.209601	6.11473	9.67203e-10	5.62423e-09
SERPINC1	37.3064	1.28073	0.323784	3.9555	7.63753e-05	0.000271968
EPS8	879.341	1.27831	0.0717282	17.8216	4.80416e-71	2.74141e-69
C1QL1	39.4038	1.27816	0.319636	3.9988	6.36636e-05	0.000229059
BAIAP3	73.1266	1.27724	0.232477	5.49405	3.92808e-08	1.99731e-07
KCNJ14	66.0988	1.27672	0.2505	5.09669	3.45646e-07	1.60362e-06
ACAP1	20.0366	1.27594	0.445853	2.86181	0.00421235	0.0114193
PDLIM3	95.9401	1.27379	0.198428	6.41942	1.36798e-10	8.55595e-10
ZNF550	293.532	1.27122	0.115593	10.9974	3.93095e-28	6.305e-27
MICB	404.648	1.27059	0.0993064	12.7946	1.75711e-37	3.98439e-36
ADCY5	15.0016	1.26848	0.507351	2.5002	0.0124122	0.0305287
ABCB9	103.271	1.26732	0.191544	6.61633	3.68215e-11	2.41649e-10
EML6	704.179	1.26446	0.0829655	15.2407	1.89706e-52	6.84094e-51
FBLN5	193.381	1.26302	0.142189	8.88267	6.52726e-19	6.87513e-18
PHLDA3	118.141	1.26258	0.185578	6.80352	1.02093e-11	6.97328e-11
SPIN4	293.388	1.26257	0.118349	10.6682	1.43399e-26	2.15212e-25
TMOD1	32.0772	1.261	0.350649	3.59619	0.000322909	0.00104799
PPP1R14C	73.8791	1.26016	0.225676	5.58394	2.35136e-08	1.21887e-07
SLC4A11	208.061	1.25964	0.13928	9.04398	1.51067e-19	1.64197e-18
GABBR1	35.8074	1.25837	0.324645	3.87614	0.000106126	0.000370165
EGLN1	409.5	1.25804	0.10763	11.6886	1.45704e-31	2.7167e-30
RORA	364.093	1.25781	0.107565	11.6935	1.37667e-31	2.57379e-30
DLX1	35.3241	1.25483	0.324365	3.86856	0.000109479	0.000380903
PKHD1	269.299	1.25351	0.126513	9.90816	3.83629e-23	4.99584e-22
MYO7A	389.499	1.25334	0.102764	12.1963	3.25382e-34	6.66519e-33
YPEL5	644.683	1.24859	0.0815338	15.3137	6.1927e-53	2.29285e-51
CLDN3	148.137	1.24788	0.161723	7.71615	1.19898e-14	9.86298e-14
MMP14	2704.34	1.24743	0.0454272	27.4599	5.29001e-166	1.32384e-163
LRRC49	28.9837	1.24729	0.363109	3.43502	0.000592501	0.00185037
COL9A2	13.5315	1.24727	0.521838	2.39014	0.0168419	0.0402945
OSR1	37.2346	1.24555	0.323823	3.84638	0.000119876	0.000415131
PCP4L1	17.713	1.24329	0.477927	2.60142	0.00928378	0.0234962
MEP1A	263.987	1.24321	0.128809	9.65158	4.84048e-22	5.95273e-21
KAT6B	777.627	1.24193	0.0753542	16.4812	5.00706e-61	2.27078e-59
RBM43	15.2542	1.23861	0.500745	2.47353	0.0133786	0.0326734
LYPD6B	376.336	1.23688	0.110244	11.2195	3.27112e-29	5.53294e-28
HAVCR1	2277.9	1.23251	0.0595286	20.7044	3.16024e-95	3.03895e-93
PVRIG	13.2355	1.23183	0.531908	2.31588	0.020565	0.0482335
HKDC1	758.79	1.22833	0.0745246	16.4822	4.92247e-61	2.2373e-59
LPCAT4	725.594	1.22776	0.0767887	15.9888	1.52967e-57	6.51081e-56
TRIM21	261.456	1.22715	0.122639	10.0062	1.43158e-23	1.89157e-22
SNAI1	281.884	1.22713	0.126909	9.66931	4.07113e-22	5.04543e-21
B4GALNT1	117.365	1.22699	0.187014	6.56094	5.34689e-11	3.46198e-10
CD83	65.3411	1.22343	0.24262	5.04256	4.59344e-07	2.10387e-06
TMEM191C	15.0105	1.22323	0.504685	2.42375	0.0153614	0.0370754
TACSTD2	1580.28	1.22243	0.057888	21.1171	5.5343e-99	5.74764e-97
CP	63.8539	1.22233	0.240507	5.08231	3.72865e-07	1.72528e-06
PNPLA8	616.404	1.22214	0.0828533	14.7507	3.04715e-49	9.90491e-48
ARID5A	115.258	1.22139	0.18585	6.57191	4.96745e-11	3.22636e-10
SPRY4	719.019	1.22028	0.0764145	15.9692	2.09386e-57	8.85775e-56
TMCC2	17.0457	1.22011	0.491625	2.4818	0.0130721	0.0319926
TGFB1	740.38	1.21847	0.0835648	14.5812	3.69969e-48	1.17502e-46
ABCC5	1520.01	1.21758	0.0548462	22.1998	3.44654e-109	4.28671e-107
ERO1A	4196.97	1.21726	0.0456442	26.6685	1.09163e-156	2.3619e-154
SPICE1	39.8133	1.21513	0.308624	3.93726	8.24166e-05	0.000291979
TTYH2	136.832	1.21147	0.173118	6.99796	2.59722e-12	1.84939e-11
MAPK11	84.4567	1.21088	0.215237	5.62581	1.84642e-08	9.66044e-08
ISYNA1	671.585	1.20997	0.0800894	15.1078	1.43916e-51	5.03246e-50
PGBD5	173.591	1.20895	0.148706	8.12981	4.29975e-16	3.838e-15
PTH1R	29.1676	1.20832	0.37595	3.21404	0.00130879	0.00387526
IRF7	297.351	1.20746	0.124555	9.6942	3.19129e-22	3.96687e-21
CECR2	61.2307	1.20635	0.250957	4.80698	1.53224e-06	6.67077e-06
CA12	62.7975	1.20632	0.242393	4.97672	6.467e-07	2.91886e-06
SAMD14	17.3047	1.20588	0.457927	2.63335	0.00845459	0.0216003
BDKRB2	45.8233	1.20584	0.290196	4.15528	3.24894e-05	0.000121112
NRIP3	327.695	1.20496	0.108449	11.1108	1.11178e-28	1.82264e-27
FAM234B	431.656	1.20444	0.0985396	12.2229	2.34632e-34	4.82528e-33
NTF3	49.3128	1.20442	0.293037	4.11014	3.95418e-05	0.000145839
CPA4	16.1691	1.20422	0.482333	2.49666	0.0125371	0.0307919
C1orf116	1046.46	1.20312	0.0731829	16.4399	9.91038e-61	4.46526e-59
CYP27A1	483.85	1.20309	0.0947049	12.7036	5.6494e-37	1.25367e-35
NKX1-2	15.5472	1.20231	0.491034	2.44854	0.0143438	0.0348137
RNF19B	555.01	1.20209	0.0893914	13.4475	3.18424e-41	8.21613e-40
FAM214A	147.796	1.2014	0.163023	7.36951	1.71255e-13	1.32235e-12
PLK3	155.78	1.19864	0.166115	7.21574	5.36411e-13	3.99634e-12
GRAMD2B	98.7798	1.19745	0.20785	5.76113	8.35523e-09	4.52179e-08
NPAS1	28.5928	1.19593	0.384458	3.11068	0.00186655	0.00537504
TNFRSF9	61.0136	1.19527	0.256353	4.66261	3.12217e-06	1.30942e-05
MOB3C	94.9286	1.19511	0.196303	6.08809	1.14268e-09	6.60577e-09
OSGIN1	743.683	1.19424	0.0755683	15.8034	2.94628e-56	1.19994e-54
CFAP44	117.364	1.1933	0.178347	6.69086	2.2186e-11	1.47985e-10
C11orf45	45.5456	1.19255	0.307178	3.88229	0.000103478	0.000361598
ACACB	345.097	1.1918	0.107269	11.1104	1.11645e-28	1.82885e-27
PCMTD1	216.245	1.19169	0.138098	8.6293	6.17277e-18	6.15233e-17
STAT5A	68.3655	1.18959	0.235937	5.04197	4.60767e-07	2.10992e-06
MEF2D	560.52	1.18946	0.0850443	13.9863	1.88925e-44	5.39033e-43
ENPP1	121.205	1.18897	0.192904	6.16352	7.11456e-10	4.18867e-09
MFSD2A	57.4191	1.18856	0.253566	4.68739	2.76713e-06	1.16679e-05
ZDBF2	283.749	1.18796	0.120592	9.85107	6.7818e-23	8.67394e-22
MLXIPL	98.1461	1.18655	0.200756	5.9104	3.41272e-09	1.9045e-08
DLK2	23.8264	1.18556	0.403383	2.93905	0.00329221	0.00909462
UBXN11	485.152	1.18537	0.0976158	12.1432	6.23644e-34	1.26625e-32
ARNTL	434.734	1.1847	0.0969331	12.2218	2.37734e-34	4.88425e-33
CYLD	415.926	1.18417	0.101191	11.7023	1.24073e-31	2.32592e-30
ZNF528	37.448	1.18318	0.330911	3.57552	0.000349533	0.00113033
MBOAT1	272.245	1.18229	0.122356	9.66274	4.34083e-22	5.36875e-21
NRXN3	201.485	1.18208	0.150028	7.87904	3.299e-15	2.80949e-14
SPNS2	20.5107	1.18192	0.424982	2.78112	0.00541719	0.0143815
CYTH1	1122.22	1.18103	0.0633118	18.6542	1.16686e-77	8.10595e-76
HMOX1	1935.95	1.18096	0.052297	22.5818	6.5496e-113	8.55608e-111
RNASE1	33.0112	1.1752	0.34986	3.35906	0.000782092	0.00239352
FAM13A	259.011	1.17302	0.132046	8.88339	6.4851e-19	6.83419e-18
DPYD	28.2002	1.17093	0.371091	3.15537	0.00160295	0.00467362
KDELR3	948.483	1.17073	0.0725878	16.1284	1.61151e-58	6.97347e-57
CDH24	382.267	1.16958	0.102857	11.3709	5.83777e-30	1.02673e-28
TOB1	1559.73	1.16877	0.0563748	20.7321	1.77789e-95	1.71761e-93
ARHGAP31	30.1605	1.16674	0.366885	3.18012	0.00147216	0.00431775
TCHH	35.2052	1.16624	0.32826	3.5528	0.000381147	0.0012276
PLXND1	1011.51	1.1659	0.067186	17.3534	1.85911e-67	9.70239e-66
BBX	24.5742	1.16586	0.392693	2.96889	0.00298881	0.00831509
C8orf58	104.491	1.16541	0.189446	6.15165	7.66816e-10	4.50312e-09
OPTN	3180.55	1.164	0.0475329	24.4884	1.96418e-132	3.39983e-130
KIAA0040	1091.65	1.16331	0.0632187	18.4013	1.28297e-75	8.62414e-74
CAPG	143.619	1.16245	0.16735	6.9462	3.75255e-12	2.6386e-11
GDPD5	765.398	1.16085	0.0734893	15.7961	3.30743e-56	1.34177e-54
BNIPL	27.0703	1.16081	0.367481	3.15884	0.00158399	0.00462222
PHACTR3	19.4327	1.16043	0.45176	2.56868	0.0102087	0.025567
GDPD3	34.0827	1.15962	0.344417	3.3669	0.000760178	0.00233112
KRTAP3-1	67.4418	1.15773	0.236078	4.90402	9.3895e-07	4.17264e-06
ST3GAL4	392.219	1.15743	0.108493	10.6682	1.43347e-26	2.15212e-25
VGLL3	706.758	1.15581	0.0862921	13.3942	6.54104e-41	1.665e-39
PPP1R3B	862.617	1.15522	0.0793879	14.5516	5.70772e-48	1.80175e-46
WNT7A	16.2783	1.15212	0.483161	2.38456	0.0170998	0.0408534
CIDEC	163.991	1.15077	0.149907	7.67653	1.63458e-14	1.33511e-13
HOXB9	105.329	1.15052	0.187247	6.14438	8.02764e-10	4.70624e-09
NPAS2	57.0594	1.14927	0.252121	4.55842	5.15401e-06	2.10157e-05
C1orf61	102.354	1.14753	0.188612	6.08408	1.1716e-09	6.76733e-09
TYMP	21.8171	1.14685	0.407399	2.81505	0.00487694	0.0130389
PLCXD2	240.854	1.14577	0.12756	8.98222	2.65348e-19	2.84981e-18
SLC7A8	1991.5	1.14484	0.053552	21.378	2.13979e-101	2.36412e-99
ELF3	1498.7	1.14328	0.062396	18.323	5.42149e-75	3.55236e-73
MBNL2	556.324	1.14328	0.0929322	12.3022	8.80877e-35	1.8315e-33
FNDC4	56.7814	1.14324	0.257572	4.43855	9.05683e-06	3.59418e-05
IL1RAP	174.311	1.14285	0.163833	6.97566	3.04431e-12	2.15593e-11
SLC4A3	181.102	1.14253	0.145645	7.84465	4.3416e-15	3.66732e-14
TRIM62	90.2124	1.14247	0.204017	5.59989	2.14487e-08	1.11629e-07
FSCN1	2121.63	1.13912	0.0547179	20.8181	2.96658e-96	2.94827e-94
TMPRSS13	1002.92	1.13901	0.0669406	17.0152	6.33368e-65	3.16243e-63
CAVIN3	75.7406	1.13704	0.223208	5.09407	3.50451e-07	1.62482e-06
B3GALT5	49.4263	1.13614	0.282985	4.01486	5.9482e-05	0.000214945
AOC1	54.5097	1.13421	0.262451	4.32161	1.54898e-05	6.00594e-05
RGS16	69.882	1.13398	0.238021	4.7642	1.89601e-06	8.15195e-06
NFE2L1	13156.3	1.13367	0.0322778	35.1222	3.08936e-270	2.13897e-267
GJB2	21.6567	1.13351	0.409348	2.76905	0.00562193	0.0148719
COL9A3	92.2101	1.13334	0.201859	5.61452	1.97111e-08	1.02999e-07
PLCD1	150.818	1.13204	0.165179	6.85342	7.2105e-12	4.97407e-11
MFNG	34.496	1.13199	0.323951	3.49432	0.000475272	0.00150946
IRF6	1630.67	1.13032	0.0547127	20.6592	8.0624e-95	7.71724e-93
TERT	41.5936	1.12985	0.299386	3.77391	0.000160711	0.000546516
YEATS2	2326.98	1.12941	0.0488752	23.108	3.85065e-118	5.67248e-116
TMPRSS6	22.7146	1.12901	0.412893	2.73438	0.00624972	0.0163988
SGK2	24.4103	1.12716	0.387503	2.90878	0.00362838	0.00995838
MVD	3861.95	1.1271	0.0439341	25.6544	3.7728e-145	7.46332e-143
CNNM4	1237.23	1.12687	0.0599642	18.7924	8.71894e-79	6.24486e-77
PRRT2	19.6298	1.12656	0.443179	2.54199	0.0110223	0.0274251
ZNF880	28.7203	1.12599	0.355952	3.16331	0.00155985	0.00455756
CEACAM5	178.068	1.12569	0.146538	7.68191	1.56735e-14	1.28221e-13
SLC22A17	35.163	1.12542	0.330823	3.40186	0.00066928	0.00207208
INSIG1	3717.61	1.12491	0.045776	24.5743	2.37743e-133	4.22064e-131
HRNR	39.6434	1.1244	0.30433	3.69468	0.000220167	0.000731974
APAF1	692.183	1.12225	0.0793907	14.1358	2.28615e-45	6.73554e-44
MELTF	556.651	1.12006	0.0852764	13.1345	2.08828e-39	5.02614e-38
ARHGEF28	415.948	1.11851	0.0967278	11.5634	6.31388e-31	1.15649e-29
RBM20	39.3586	1.11847	0.304444	3.6738	0.00023897	0.000790514
EPAS1	2067.7	1.11829	0.0505372	22.128	1.69931e-108	2.07625e-106
MARF1	501.107	1.11709	0.0899655	12.4168	2.11752e-35	4.47436e-34
DQX1	39.0242	1.11632	0.303181	3.68203	0.000231383	0.000767616
IKBIP	549.403	1.11557	0.0891254	12.5168	6.03884e-36	1.29579e-34
TOX3	273.685	1.11499	0.1185	9.40919	4.99951e-21	5.83071e-20
AMIGO2	17.6722	1.11486	0.458395	2.43209	0.0150119	0.0363122
ERRFI1	1220.23	1.11452	0.06142	18.1459	1.38315e-73	8.62744e-72
TUBB4A	17.6236	1.11436	0.46506	2.39617	0.0165673	0.0397193
PGM2L1	435.605	1.11292	0.103825	10.7191	8.28036e-27	1.25633e-25
DACT2	176.093	1.11242	0.152895	7.27571	3.44605e-13	2.60757e-12
ZNF329	185.762	1.11237	0.142902	7.78413	7.01956e-15	5.84147e-14
SLC37A1	210.468	1.11117	0.138839	8.00331	1.21116e-15	1.05436e-14
PLIN2	1869.9	1.11057	0.0533566	20.8142	3.2209e-96	3.18578e-94
PIK3AP1	123.902	1.11036	0.174384	6.36731	1.92369e-10	1.19097e-09
OLFML2A	47.5795	1.11008	0.277264	4.0037	6.23591e-05	0.000224599
SLC25A42	102.634	1.10922	0.191326	5.79755	6.72913e-09	3.66275e-08
ANKRD9	330.33	1.10632	0.108785	10.1698	2.70405e-24	3.71222e-23
PTK2B	644.79	1.10467	0.0823195	13.4193	4.65916e-41	1.19476e-39
MSANTD1	16.3627	1.10411	0.468818	2.3551	0.0185177	0.0438825
LRP1	4064.37	1.10409	0.044958	24.5582	3.53171e-133	6.21671e-131
PLEC	6197.55	1.10404	0.0528357	20.8958	5.84729e-97	5.89583e-95
ATXN1	183.536	1.10307	0.146549	7.527	5.19201e-14	4.14941e-13
NEBL	1223.17	1.10229	0.0793706	13.8879	7.4967e-44	2.09293e-42
ZFP14	69.2096	1.10164	0.231262	4.76359	1.90174e-06	8.1749e-06
LPIN2	2093.12	1.10007	0.0500767	21.9678	5.85876e-107	6.87527e-105
DIP2C	477.107	1.09961	0.092166	11.9308	8.18279e-33	1.59143e-31
GPR153	82.9214	1.09958	0.212813	5.16686	2.38057e-07	1.12507e-06
RASL11A	285.673	1.0994	0.115942	9.4823	2.48748e-21	2.96429e-20
GOLGA7B	39.3569	1.09938	0.3104	3.54182	0.000397381	0.00127712
MVP	1151.78	1.09821	0.0644953	17.0278	5.11061e-65	2.55789e-63
GPX2	880.84	1.09769	0.0700198	15.6769	2.1773e-55	8.68037e-54
LRRC75A	73.3448	1.09639	0.225479	4.86251	1.15907e-06	5.10608e-06
GALNT3	817.114	1.09594	0.0744203	14.7263	4.36856e-49	1.41119e-47
CRLF1	23.1934	1.09513	0.415983	2.63263	0.0084726	0.021641
LRP2BP	27.854	1.09477	0.427978	2.55801	0.0105272	0.0263065
TBC1D3L	29.7621	1.09467	0.359072	3.0486	0.00229909	0.00652204
IFI6	136.214	1.09428	0.164755	6.64186	3.09756e-11	2.04447e-10
PIGZ	52.5604	1.09398	0.266641	4.10283	4.08118e-05	0.000150355
ARRDC3	592.833	1.0938	0.0832347	13.1412	1.91291e-39	4.61476e-38
CACNB3	333.614	1.09247	0.110747	9.86463	5.92506e-23	7.61568e-22
RPS6KA5	142.251	1.09222	0.161599	6.75885	1.39095e-11	9.4201e-11
GLCCI1	347.09	1.09158	0.107153	10.1872	2.26247e-24	3.12458e-23
LYPD3	29.5018	1.09158	0.349036	3.1274	0.00176358	0.00510044
PRRG4	399.376	1.09134	0.100658	10.8421	2.1746e-27	3.39359e-26
LNX1	148.87	1.0913	0.157913	6.91073	4.82162e-12	3.37205e-11
BCL6	578.108	1.09128	0.0854505	12.7709	2.38419e-37	5.38282e-36
PTPRU	926.056	1.09107	0.0686674	15.8892	7.52989e-57	3.13434e-55
HSPA13	793.09	1.09064	0.073938	14.7507	3.04439e-49	9.90491e-48
STOX2	18.2684	1.09046	0.458519	2.37822	0.0173967	0.0414768
TINAGL1	2057.04	1.09035	0.0554713	19.656	5.13293e-86	4.24765e-84
SRPX	123.74	1.08935	0.172664	6.30907	2.80723e-10	1.718e-09
GPSM1	559.358	1.08912	0.085434	12.748	3.19674e-37	7.19388e-36
MICAL1	654.885	1.08904	0.0861699	12.6383	1.29865e-36	2.8484e-35
IGFBP6	697.485	1.08776	0.0837239	12.9922	1.3539e-38	3.14915e-37
FRAT1	22.0239	1.08626	0.422522	2.57089	0.0101438	0.025422
ENPP5	19.5812	1.08595	0.435045	2.49617	0.0125542	0.0308268
NIBAN1	173.57	1.08551	0.150435	7.21581	5.36149e-13	3.99582e-12
SNX25	492.813	1.08513	0.0896491	12.1042	1.00343e-33	2.0196e-32
ZBTB46	107.196	1.08365	0.191183	5.66811	1.44382e-08	7.63199e-08
ICAM1	724.287	1.08266	0.0746882	14.4957	1.28925e-47	4.02693e-46
AKT3	19.4605	1.08261	0.429546	2.52037	0.0117232	0.0289816
COL4A4	355.67	1.08258	0.106093	10.204	1.90252e-24	2.63624e-23
USP54	1077.35	1.08167	0.0676944	15.9787	1.79813e-57	7.63783e-56
ZCCHC24	159.826	1.08074	0.159802	6.763	1.35161e-11	9.15963e-11
INSR	708.529	1.08003	0.075194	14.3632	8.80686e-47	2.68222e-45
MEGF9	122.045	1.0797	0.185824	5.81032	6.23542e-09	3.40205e-08
DSP	17821.1	1.07968	0.0344079	31.3789	3.93059e-216	1.63285e-213
B3GNT8	28.6892	1.07813	0.353907	3.04635	0.00231636	0.00656598
SRGAP2B	18.9777	1.07727	0.438676	2.45572	0.0140603	0.0341935
SRC	2353.96	1.07644	0.0481833	22.3405	1.49236e-110	1.87865e-108
WDR47	220.242	1.07612	0.133136	8.08286	6.32659e-16	5.59904e-15
RHOD	294.154	1.07612	0.115528	9.31478	1.22201e-20	1.40701e-19
ING4	304.909	1.07471	0.117146	9.1741	4.55363e-20	5.08513e-19
CLSTN3	873.107	1.07459	0.0712617	15.0794	2.2112e-51	7.69329e-50
SFRP5	79.2373	1.07307	0.216364	4.95956	7.06519e-07	3.17574e-06
OSBP2	161.35	1.07201	0.153744	6.97269	3.10932e-12	2.20047e-11
NPC1	1706.23	1.07136	0.0559653	19.1433	1.09986e-81	8.27723e-80
GRHL3	68.381	1.07122	0.243253	4.40371	1.06413e-05	4.19255e-05
NFIL3	308.858	1.07061	0.115849	9.24139	2.43323e-20	2.76632e-19
STON2	375.922	1.06953	0.101437	10.5438	5.42393e-26	7.99577e-25
CD24	1452.54	1.06932	0.060238	17.7515	1.67743e-70	9.41675e-69
SDK1	76.3511	1.06913	0.227866	4.69194	2.70632e-06	1.14208e-05
MFSD6	252.939	1.06893	0.130039	8.2201	2.03325e-16	1.85802e-15
RFLNA	662.166	1.06881	0.0846418	12.6274	1.49096e-36	3.25644e-35
AGPAT2	1500.83	1.06753	0.0608777	17.5357	7.65358e-69	4.13991e-67
HAS3	374.483	1.06686	0.101722	10.488	9.80541e-26	1.43126e-24
REEP1	415.005	1.06646	0.105896	10.0709	7.4321e-24	9.95949e-23
NBL1	242.427	1.06568	0.14316	7.44396	9.77133e-14	7.67336e-13
PLAG1	24.9218	1.06542	0.401917	2.65085	0.0080289	0.0206269
TFCP2L1	846.435	1.06493	0.0789064	13.4962	1.64723e-41	4.29833e-40
HOMER2	67.7078	1.06442	0.235112	4.52729	5.9744e-06	2.41758e-05
PMEL	295.399	1.06424	0.114285	9.31212	1.25305e-20	1.44195e-19
FLVCR2	327.284	1.06247	0.114596	9.27142	1.83685e-20	2.09748e-19
PLEKHA6	636.864	1.06029	0.0794663	13.3426	1.30777e-40	3.27668e-39
PMEPA1	74.4067	1.0594	0.230416	4.59776	4.27054e-06	1.75894e-05
HLA-E	2236.2	1.05877	0.0502202	21.0825	1.15056e-98	1.18897e-96
DLL4	50.6135	1.05868	0.276611	3.82734	0.000129535	0.000446419
HSD17B6	26.2848	1.05731	0.371601	2.8453	0.00443702	0.0119675
RNF103	254.603	1.05715	0.124052	8.52184	1.57044e-17	1.52286e-16
SEMA7A	703.227	1.05678	0.077417	13.6505	2.00569e-42	5.39639e-41
ATP2B4	1057.14	1.05642	0.0641931	16.4569	7.47813e-61	3.3767e-59
THAP8	158.677	1.05611	0.153642	6.87382	6.25063e-12	4.32629e-11
S1PR2	99.3515	1.05594	0.199513	5.29259	1.20598e-07	5.85815e-07
RNF152	64.051	1.05577	0.239248	4.41286	1.02014e-05	4.02917e-05
NR1D1	107.827	1.0555	0.190294	5.5467	2.91112e-08	1.4967e-07
WDR66	20.295	1.05445	0.417487	2.5257	0.0115467	0.028595
PLEKHG5	227.24	1.05282	0.129783	8.11214	4.97365e-16	4.42621e-15
GOLGB1	4343.02	1.05281	0.0449456	23.4241	2.42729e-121	3.73461e-119
F2RL1	3794.5	1.05254	0.0476134	22.1059	2.77428e-108	3.35027e-106
ASAP3	273.146	1.05238	0.117081	8.98843	2.50785e-19	2.699e-18
IGFBP4	3706.51	1.05186	0.0523475	20.0939	8.3446e-90	7.43887e-88
PDZD7	24.0677	1.05186	0.388096	2.7103	0.00672229	0.0175303
PRICKLE1	82.0621	1.05163	0.218822	4.80586	1.54085e-06	6.70401e-06
CDKN2D	99.7005	1.0502	0.192818	5.44656	5.13533e-08	2.58208e-07
PINK1	229.212	1.04944	0.140126	7.48928	6.92523e-14	5.49232e-13
FSTL3	1029.45	1.04829	0.0669918	15.648	3.42723e-55	1.35853e-53
AGO4	172.12	1.04735	0.147618	7.09501	1.29339e-12	9.41312e-12
HBEGF	401.535	1.04677	0.103529	10.1109	4.94192e-24	6.65254e-23
IFIH1	40.4468	1.04672	0.309458	3.38244	0.000718459	0.00221182
IPMK	468.827	1.04637	0.0907182	11.5343	8.8616e-31	1.6146e-29
HOXB13	90.2088	1.0455	0.203767	5.13085	2.88436e-07	1.35178e-06
SLC34A2	26.275	1.04493	0.396996	2.63209	0.00848608	0.0216727
RHBDL1	46.9839	1.04393	0.286054	3.64943	0.000262823	0.000864056
CPT1A	345.467	1.04259	0.107466	9.70158	2.96879e-22	3.69692e-21
NT5DC4	46.1899	1.04211	0.279208	3.73237	0.000189688	0.000637234
CARS1	2244.36	1.04057	0.04912	21.1842	1.33609e-99	1.40872e-97
CRTC1	187.015	1.04054	0.146795	7.08838	1.35692e-12	9.86168e-12
LMBR1L	350.922	1.03989	0.109213	9.52168	1.70402e-21	2.04355e-20
CCDC80	686.537	1.03907	0.0800625	12.9783	1.62548e-38	3.76818e-37
CFAP410	169.532	1.03891	0.148217	7.00938	2.39377e-12	1.71216e-11
ZNF488	654.411	1.03828	0.0831774	12.4827	9.27423e-36	1.97777e-34
PPP1R15A	2819.97	1.03806	0.0517246	20.0689	1.37994e-89	1.21453e-87
SLCO4A1	1061.9	1.03491	0.063866	16.2044	4.69184e-59	2.05167e-57
ZNF737	33.438	1.03286	0.345152	2.99249	0.00276715	0.00774617
VKORC1	270.801	1.03275	0.128746	8.02161	1.04366e-15	9.13906e-15
SYNE3	872.918	1.03275	0.0712522	14.4943	1.3168e-47	4.10679e-46
SOX8	60.3778	1.03247	0.262548	3.93251	8.40636e-05	0.000297256
ISX	133.469	1.03195	0.178259	5.78902	7.07984e-09	3.84861e-08
SLC38A3	140.697	1.03168	0.167235	6.16906	6.86957e-10	4.04903e-09
SYTL3	32.1243	1.03057	0.334291	3.08287	0.00205018	0.00586399
GCSAM	171.238	1.03026	0.14851	6.93726	3.99781e-12	2.80725e-11
GJB3	32.8003	1.0292	0.339264	3.03364	0.00241626	0.00682832
TCIRG1	20.5549	1.02749	0.419916	2.4469	0.0144093	0.0349603
SLC41A1	767.636	1.02663	0.0741861	13.8386	1.49145e-43	4.11954e-42
PRNP	1025.62	1.0266	0.0654014	15.6969	1.5888e-55	6.37084e-54
ZNF548	41.3583	1.02637	0.298133	3.44265	0.00057604	0.00180249
CDH4	47.5891	1.02632	0.291447	3.52145	0.000429197	0.001373
RELT	452.971	1.02596	0.0926167	11.0775	1.61299e-28	2.62771e-27
MR1	55.943	1.02584	0.270015	3.79919	0.000145172	0.00049674
TIAM2	107.32	1.02524	0.186284	5.50365	3.71999e-08	1.89475e-07
NR2E1	39.3125	1.02491	0.311778	3.2873	0.00101151	0.00303571
BCAR3	166.39	1.02277	0.149239	6.85322	7.22058e-12	4.97937e-11
CLDN4	5548.44	1.02171	0.0482737	21.1649	2.0108e-99	2.10941e-97
DUSP1	669.967	1.01985	0.0816498	12.4905	8.40789e-36	1.79486e-34
COL5A1	252.685	1.01947	0.124752	8.17197	3.03404e-16	2.73882e-15
APOA4	30.9938	1.01908	0.346118	2.94432	0.00323666	0.00895069
TIAF1	79.5242	1.01895	0.218549	4.66233	3.12652e-06	1.31088e-05
ACKR2	37.5367	1.01883	0.317601	3.2079	0.00133706	0.00394939
TMEM144	385.766	1.01851	0.100419	10.1427	3.57159e-24	4.86462e-23
SMIM6	79.1972	1.01839	0.21601	4.71453	2.42273e-06	1.02888e-05
ADAP2	23.335	1.01749	0.397541	2.55946	0.0104834	0.0262067
ZNF571	40.287	1.01712	0.298143	3.41152	0.000646018	0.00200605
ABCA2	797.706	1.01629	0.0721491	14.086	4.6318e-45	1.35122e-43
OTUD1	80.2335	1.01587	0.212595	4.7784	1.76698e-06	7.62877e-06
SMPD3	358.623	1.01555	0.106542	9.53197	1.54331e-21	1.85618e-20
TCN2	456.89	1.01488	0.0937635	10.8238	2.6543e-27	4.12668e-26
SORL1	2030.75	1.01424	0.0542929	18.6808	7.09003e-78	4.95849e-76
KRBOX4	179.123	1.01407	0.146879	6.90409	5.05252e-12	3.52404e-11
ALDH1L2	283.817	1.01354	0.124893	8.11524	4.84812e-16	4.3182e-15
MTMR8	25.3003	1.01324	0.379941	2.66682	0.00765719	0.0197378
PPCDC	237.341	1.01235	0.127053	7.96795	1.61335e-15	1.39107e-14
TBC1D17	899.669	1.012	0.0764501	13.2374	5.33303e-40	1.31247e-38
HDAC11	203.273	1.01091	0.143318	7.05365	1.74288e-12	1.25743e-11
SEMA4B	313.256	1.01037	0.113211	8.92463	4.47191e-19	4.73908e-18
WDR45	246.243	1.00984	0.124996	8.07898	6.53114e-16	5.77515e-15
CCDC102A	235.713	1.00947	0.128894	7.83183	4.80819e-15	4.04828e-14
PC	432.427	1.00917	0.0938026	10.7584	5.40837e-27	8.31512e-26
SLC2A1	19638.7	1.00754	0.043716	23.0473	1.56511e-117	2.27335e-115
ZNF559	24.2653	1.00715	0.409456	2.45973	0.013904	0.033845
ACSL5	1217.45	1.00699	0.06312	15.9536	2.6879e-57	1.13476e-55
INHBB	722.179	1.0066	0.0790384	12.7356	3.7512e-37	8.42336e-36
SUCO	2128.52	1.006	0.0535556	18.7842	1.01673e-78	7.23237e-77
ELOVL3	28.9868	1.00458	0.35921	2.79664	0.00516364	0.0137646
RND1	68.8294	1.00394	0.239203	4.19704	2.70431e-05	0.000101649
CEBPB	730.649	1.00361	0.0763197	13.1501	1.7003e-39	4.11141e-38
PLAAT4	24.5999	1.00327	0.380472	2.63692	0.00836626	0.0213983
RBP2	290.781	-1.00041	0.115268	-8.67897	3.99373e-18	4.03668e-17
RAD9B	37.4708	-1.00292	0.31508	-3.18305	0.00145732	0.00427846
PLPP2	251.853	-1.00392	0.129196	-7.77051	7.81695e-15	6.49464e-14
MYL9	4886.57	-1.00396	0.0404028	-24.8487	2.67272e-136	4.91284e-134
MACROD1	215.616	-1.00548	0.131096	-7.66981	1.72249e-14	1.40526e-13
THAP11	623.219	-1.00568	0.0838113	-11.9994	3.58065e-33	7.05632e-32
HNRNPU	13258	-1.0065	0.0337958	-29.7818	6.72417e-195	2.3278e-192
SLC25A15	616.363	-1.00723	0.0828203	-12.1616	4.97603e-34	1.0153e-32
FIGNL2	19.9658	-1.00748	0.426686	-2.36118	0.0182168	0.0432535
SBF2	576.605	-1.00855	0.0882733	-11.4253	3.12408e-30	5.55093e-29
UROD	604.028	-1.00879	0.0834852	-12.0835	1.29098e-33	2.58333e-32
PARPBP	282.341	-1.00908	0.116991	-8.62526	6.39458e-18	6.36425e-17
GAMT	524.813	-1.00946	0.0894267	-11.2881	1.50275e-29	2.59034e-28
PPP1R35	95.2182	-1.00988	0.195538	-5.16461	2.4094e-07	1.13766e-06
PURA	529.133	-1.01039	0.0919911	-10.9835	4.58642e-28	7.30556e-27
ATIC	5295.42	-1.01167	0.0376627	-26.8612	6.2401e-159	1.40884e-156
PDZK1IP1	33.5102	-1.01189	0.334663	-3.0236	0.00249789	0.00703889
NUP35	632.031	-1.0123	0.0784583	-12.9024	4.36162e-38	1.00327e-36
OLR1	3045.48	-1.01235	0.04626	-21.8839	3.6998e-106	4.24578e-104
CEP55	2203.73	-1.01279	0.0551752	-18.356	2.95852e-75	1.97593e-73
PHGR1	309.518	-1.01414	0.11069	-9.16203	5.09278e-20	5.66589e-19
MRPL19	1234.11	-1.01545	0.0602284	-16.86	8.85447e-64	4.30717e-62
EIF2B3	497.023	-1.01694	0.0902453	-11.2686	1.87578e-29	3.20938e-28
NOC4L	413.373	-1.0172	0.0978618	-10.3943	2.63325e-25	3.7773e-24
ZNF239	351.605	-1.01826	0.107468	-9.47503	2.66674e-21	3.17063e-20
ALDH1B1	1342.43	-1.01908	0.061797	-16.4908	4.2751e-61	1.94733e-59
NDST4	66.2328	-1.01927	0.232714	-4.37994	1.18714e-05	4.64984e-05
CCDC170	56.2563	-1.01937	0.283178	-3.59975	0.000318525	0.00103457
KIF23	1827.15	-1.02126	0.0561492	-18.1883	6.38508e-74	4.00678e-72
ASPHD1	218.039	-1.02442	0.133288	-7.68582	1.52022e-14	1.24464e-13
PPP1R36	30.7405	-1.02668	0.368207	-2.78832	0.00529827	0.0140946
STK32B	87.8925	-1.02742	0.203157	-5.05727	4.25298e-07	1.95656e-06
AARSD1	34.5794	-1.02843	0.332999	-3.08838	0.00201249	0.00576492
COL28A1	84.4492	-1.02994	0.205518	-5.01141	5.40328e-07	2.45637e-06
AXIN2	1431.08	-1.03114	0.0577193	-17.8648	2.2182e-71	1.29422e-69
HECW2	25.1621	-1.03146	0.387348	-2.66287	0.00774781	0.019964
CCDC34	501.593	-1.03311	0.0894995	-11.5432	7.98662e-31	1.45773e-29
RAC3	933.89	-1.03498	0.0694074	-14.9117	2.76569e-50	9.37132e-49
NME2	59.9372	-1.03565	0.258635	-4.00427	6.2208e-05	0.000224171
TIGD2	324.861	-1.03646	0.108821	-9.52447	1.65892e-21	1.99061e-20
H2BC9	40.4676	-1.03917	0.295986	-3.51087	0.000446651	0.00142553
DDC	961.326	-1.0401	0.0665565	-15.6273	4.74366e-55	1.86611e-53
LRRCC1	151.69	-1.04044	0.165382	-6.29113	3.15165e-10	1.91917e-09
LMNB1	2799.31	-1.04223	0.0509899	-20.4399	7.38222e-93	6.87605e-91
MARS2	332.411	-1.04285	0.105538	-9.88121	5.02224e-23	6.50761e-22
FAM122A	77.1253	-1.04337	0.219389	-4.75578	1.97678e-06	8.47991e-06
HMBS	1351.23	-1.04476	0.0593981	-17.589	2.98849e-69	1.63352e-67
BEND3	175.01	-1.04672	0.148409	-7.05295	1.75158e-12	1.26327e-11
CTU2	423.237	-1.04688	0.0984961	-10.6287	2.19159e-26	3.2632e-25
AADAC	20.1794	-1.04716	0.417601	-2.50756	0.012157	0.0299504
TAF10	97.8918	-1.04907	0.193444	-5.42315	5.85564e-08	2.93078e-07
CARM1	1387.2	-1.04917	0.0583094	-17.9931	2.20586e-72	1.32422e-70
FAM83D	1805.43	-1.04964	0.058282	-18.0097	1.63628e-72	9.85133e-71
DNAH6	30.0507	-1.04994	0.356924	-2.94165	0.00326472	0.0090259
MROH8	24.1992	-1.05159	0.396826	-2.64999	0.00804931	0.0206742
MBLAC2	57.1155	-1.05181	0.250917	-4.19187	2.76667e-05	0.000103805
DIMT1	475.91	-1.05303	0.091862	-11.4631	2.02076e-30	3.61838e-29
KDM8	83.0545	-1.05434	0.212983	-4.95035	7.40806e-07	3.32339e-06
FAM43B	42.6765	-1.05583	0.288944	-3.6541	0.000258083	0.000849548
NIP7	1548.6	-1.05908	0.0579419	-18.2782	1.23355e-74	7.85955e-73
HMGB3	1113.05	-1.05994	0.0694111	-15.2705	1.20236e-52	4.39688e-51
SET	9848.88	-1.06087	0.0354386	-29.9354	6.80699e-197	2.43772e-194
B3GNT10	24.735	-1.06117	0.395464	-2.68335	0.00728891	0.0188822
ATPSCKMT	226.221	-1.06483	0.127489	-8.35234	6.69223e-17	6.28126e-16
RARRES1	28.6237	-1.06504	0.35207	-3.02508	0.00248569	0.00700831
LGI2	92.2237	-1.06602	0.20434	-5.2169	1.8194e-07	8.69554e-07
CKAP2	1270.16	-1.06692	0.0707142	-15.0878	1.94965e-51	6.80609e-50
TM4SF4	23.9273	-1.06876	0.388733	-2.74934	0.00597145	0.0157283
BOP1	1423.44	-1.0694	0.0667733	-16.0155	9.96739e-58	4.25118e-56
NDUFAF4	353.453	-1.07333	0.10864	-9.87967	5.10002e-23	6.59605e-22
MT-ATP6	40280.3	-1.07418	0.0332677	-32.289	9.97605e-229	4.60472e-226
CD14	68.9807	-1.07526	0.233846	-4.59814	4.26286e-06	1.75647e-05
TRNT1	563.928	-1.07616	0.0895035	-12.0236	2.66962e-33	5.28102e-32
DNAJC15	1857.73	-1.07688	0.0557311	-19.3227	3.45846e-83	2.66058e-81
EHHADH	325.448	-1.07735	0.117899	-9.13788	6.36863e-20	7.04757e-19
KTI12	69.5414	-1.08035	0.245572	-4.39931	1.08594e-05	4.27439e-05
BCCIP	1908.8	-1.0818	0.0509838	-21.2184	6.45464e-100	6.84027e-98
HMGB1	4274.68	-1.08244	0.039514	-27.3938	3.2538e-165	7.85867e-163
GNG2	84.0454	-1.08398	0.207163	-5.2325	1.67231e-07	8.01468e-07
METTL5	646.799	-1.08445	0.0790518	-13.7182	7.89917e-43	2.14475e-41
MCRIP1	158.925	-1.08447	0.155441	-6.97675	3.02083e-12	2.14076e-11
PKDCC	3830.8	-1.0857	0.0400238	-27.1263	4.82564e-162	1.1137e-159
RNLS	51.5584	-1.08653	0.275601	-3.94238	8.06762e-05	0.000286645
IDNK	25.5626	-1.08664	0.397538	-2.73342	0.00626796	0.0164384
DNAH3	61.8556	-1.08684	0.247877	-4.38462	1.16189e-05	4.55868e-05
SLC1A3	3542.52	-1.08873	0.0404568	-26.911	1.63257e-159	3.72639e-157
TAF9B	305.012	-1.09033	0.115776	-9.41766	4.61261e-21	5.39462e-20
GTF2H2	194.205	-1.0914	0.143339	-7.61414	2.65449e-14	2.14288e-13
CISD3	179.323	-1.09155	0.145706	-7.49142	6.81319e-14	5.40966e-13
HNRNPA3	5140.07	-1.09462	0.0459337	-23.8304	1.61762e-125	2.54542e-123
ABCE1	2108.36	-1.09502	0.0561248	-19.5105	8.93992e-85	7.08744e-83
TIMM10	750.179	-1.0971	0.0734955	-14.9275	2.18328e-50	7.40994e-49
FAM216A	210.958	-1.09728	0.137595	-7.97469	1.52761e-15	1.31988e-14
C1orf131	633.166	-1.0974	0.0815198	-13.4618	2.62585e-41	6.81768e-40
ADAT2	272.81	-1.09766	0.117908	-9.30946	1.28481e-20	1.47768e-19
GEMIN5	1291.85	-1.09915	0.0650706	-16.8916	5.18693e-64	2.54699e-62
HSPH1	5394.21	-1.10002	0.0437854	-25.123	2.78653e-139	5.16777e-137
COQ3	147.923	-1.1014	0.15612	-7.05482	1.72827e-12	1.24776e-11
SPA17	22.7132	-1.10284	0.423766	-2.60249	0.00925505	0.0234321
TLL1	82.8659	-1.10286	0.217385	-5.07331	3.90957e-07	1.80577e-06
SLC5A6	2063.13	-1.10309	0.0549284	-20.0824	1.05189e-89	9.29737e-88
VPS36	674.46	-1.10386	0.0828722	-13.32	1.77045e-40	4.41995e-39
DCDC2	2794.98	-1.10391	0.0454855	-24.2694	4.12447e-130	6.85355e-128
RSAD1	1318.96	-1.10559	0.0588703	-18.7801	1.09803e-78	7.78404e-77
FP565260.1	26.983	-1.10736	0.376979	-2.93746	0.00330909	0.00913666
NKD1	1000.19	-1.10992	0.0740811	-14.9826	9.54741e-51	3.27784e-49
RPL39L	20.4301	-1.11136	0.419672	-2.64817	0.00809282	0.0207757
MYLPF	21.2215	-1.11158	0.413614	-2.68748	0.00719931	0.0186711
FGG	523.995	-1.11172	0.0984942	-11.2871	1.51924e-29	2.61595e-28
DTD1	460.398	-1.11202	0.0998801	-11.1335	8.61419e-29	1.42004e-27
STEAP3	576.34	-1.11223	0.0837563	-13.2793	3.05177e-40	7.55522e-39
KPNA3	1985.02	-1.11339	0.057607	-19.3273	3.16314e-83	2.44243e-81
HLF	150.34	-1.11355	0.161171	-6.90914	4.87588e-12	3.4077e-11
RTN4IP1	197.391	-1.11383	0.138992	-8.01361	1.1139e-15	9.7336e-15
DNAJC17	118.869	-1.11652	0.174941	-6.38228	1.74474e-10	1.08309e-09
HSPE1	1219.95	-1.1169	0.143988	-7.75689	8.70344e-15	7.21385e-14
NAA15	1797.29	-1.11832	0.0609265	-18.3552	3.00169e-75	1.99834e-73
NOP16	783.038	-1.12064	0.0732099	-15.3072	6.84486e-53	2.5253e-51
WDR46	1136.92	-1.12148	0.0612392	-18.313	6.51285e-75	4.25404e-73
MRTO4	1346.89	-1.12234	0.0611772	-18.3456	3.57731e-75	2.36638e-73
ERICH2	24.1813	-1.12456	0.410607	-2.73879	0.00616666	0.0161931
ACTL8	4069.93	-1.1248	0.0404873	-27.7815	7.26165e-170	1.98463e-167
UNC13C	39.0892	-1.12579	0.306435	-3.67384	0.000238935	0.000790514
HSD17B8	113.041	-1.12606	0.184575	-6.10078	1.05549e-09	6.12448e-09
ACTB	67501.5	-1.12695	0.0404113	-27.8871	3.82491e-171	1.0593e-168
FAM155B	77.0558	-1.12785	0.217948	-5.17487	2.28072e-07	1.07911e-06
LDHD	43.3194	-1.12864	0.294578	-3.83139	0.000127421	0.000439717
RPL17	154.678	-1.13334	0.155406	-7.29278	3.0363e-13	2.3034e-12
LDHB	729.196	-1.1334	0.089155	-12.7127	5.02962e-37	1.11733e-35
DTD2	81.5043	-1.13463	0.213956	-5.30309	1.13859e-07	5.54507e-07
CLGN	19.5187	-1.13497	0.457926	-2.47851	0.0131932	0.0322699
URB2	763.857	-1.13592	0.0760555	-14.9354	1.93938e-50	6.59295e-49
MT-ND6	8373.79	-1.13606	0.0329816	-34.4453	5.29224e-260	3.54597e-257
H2AJ	400.499	-1.13795	0.0998814	-11.393	4.53017e-30	8.00137e-29
PNPT1	2424.65	-1.1388	0.0548751	-20.7525	1.16383e-95	1.14568e-93
FARSB	2307.9	-1.13922	0.0502993	-22.6488	1.43347e-113	1.92094e-111
TIPIN	371.322	-1.13941	0.101313	-11.2464	2.41322e-29	4.09518e-28
CCDC86	1434.15	-1.14058	0.067056	-17.0094	6.994e-65	3.48375e-63
NPR2	402.393	-1.14066	0.120468	-9.46851	2.83852e-21	3.36524e-20
ZSCAN12	65.1686	-1.14305	0.243612	-4.69211	2.70408e-06	1.14136e-05
MAML3	232.529	-1.1437	0.131361	-8.70652	3.13335e-18	3.19346e-17
TBC1D7	916.656	-1.14399	0.0678298	-16.8656	8.05408e-64	3.92703e-62
MRPL20	804.068	-1.14515	0.07231	-15.8366	1.73899e-56	7.13843e-55
FRA10AC1	168.837	-1.14793	0.146789	-7.82025	5.27197e-15	4.42799e-14
SCFD2	155.16	-1.15024	0.155337	-7.40482	1.31331e-13	1.02053e-12
RUVBL1	1480.25	-1.1508	0.0550262	-20.9136	4.02587e-97	4.09908e-95
ADTRP	18.8563	-1.15375	0.441762	-2.61169	0.00900948	0.0228498
ARHGAP11A	1196.9	-1.15429	0.0694052	-16.6312	4.14038e-62	1.93258e-60
RNF128	651.204	-1.15454	0.0792772	-14.5633	4.80912e-48	1.5204e-46
TMEM126B	1313.37	-1.15517	0.0671685	-17.198	2.74746e-66	1.41256e-64
WDR35	300.291	-1.15811	0.11182	-10.357	3.89132e-25	5.53606e-24
NUDT3	38.9308	-1.15877	0.304989	-3.7994	0.000145048	0.000496423
CAD	2842.31	-1.15889	0.0451389	-25.6738	2.29379e-145	4.62565e-143
MT-ND5	44685.3	-1.15972	0.0310569	-37.3418	3.44429e-305	2.98089e-302
XKRX	300.779	-1.15998	0.114656	-10.117	4.64395e-24	6.26361e-23
ELAC1	34.8442	-1.16248	0.32289	-3.60025	0.000317911	0.0010329
IKZF3	37.9293	-1.16308	0.313362	-3.7116	0.000205951	0.000688858
NUCKS1	4315.71	-1.16346	0.0420196	-27.6885	9.59415e-169	2.55487e-166
ADSL	184.902	-1.16562	0.142665	-8.17035	3.07494e-16	2.77453e-15
PIWIL1	21.8573	-1.17096	0.410715	-2.85103	0.0043578	0.0117645
COA7	736.682	-1.17133	0.079705	-14.6958	6.85848e-49	2.20864e-47
PUM3	1406.82	-1.17205	0.0571073	-20.5236	1.3248e-93	1.25651e-91
NUDC	2336.71	-1.1729	0.0514928	-22.7779	7.58951e-115	1.03034e-112
AGBL3	35.0821	-1.17431	0.320679	-3.66196	0.000250295	0.00082522
MSRB2	110.575	-1.17438	0.188892	-6.21718	5.06157e-10	3.01361e-09
ADH6	95.9	-1.17453	0.195165	-6.01815	1.76423e-09	1.00342e-08
BMP4	1499.21	-1.17487	0.0574146	-20.4628	4.61618e-93	4.31904e-91
IGSF23	24.7614	-1.17823	0.389544	-3.02463	0.00248941	0.00701691
CCDC18	125.431	-1.17848	0.183784	-6.41231	1.43332e-10	8.94577e-10
RPF2	872.196	-1.1786	0.073976	-15.9322	3.79067e-57	1.59385e-55
GTF2H2C	95.9547	-1.17936	0.200828	-5.8725	4.29274e-09	2.37772e-08
EXOSC6	575.666	-1.17991	0.0849894	-13.883	8.03312e-44	2.23968e-42
RNFT2	21.6806	-1.18067	0.407847	-2.89488	0.00379309	0.0103803
GADL1	16.6455	-1.18113	0.481205	-2.45453	0.0141069	0.0342909
SRSF1	1051.69	-1.18312	0.0762857	-15.509	3.01527e-54	1.14918e-52
DNAAF2	267.453	-1.18534	0.120114	-9.86844	5.70465e-23	7.34587e-22
DCTPP1	736.871	-1.18688	0.0796384	-14.9034	3.13239e-50	1.05622e-48
LYAR	870.293	-1.18932	0.0694892	-17.1152	1.14263e-65	5.80282e-64
LRFN1	275.32	-1.19026	0.121257	-9.81598	9.60996e-23	1.22234e-21
UBE2C	3801.99	-1.19181	0.0420174	-28.3646	5.52932e-177	1.57328e-174
NOP56	5869.32	-1.19317	0.040571	-29.4095	4.15124e-190	1.39073e-187
ANAPC15	256.018	-1.1936	0.129696	-9.20308	3.47848e-20	3.92245e-19
RPIA	779.052	-1.19789	0.0739311	-16.2028	4.81446e-59	2.10086e-57
MRPL24	452.721	-1.20038	0.0958388	-12.525	5.44842e-36	1.17152e-34
FKBP4	3719.58	-1.20245	0.0438496	-27.4221	1.49707e-165	3.65831e-163
WDR3	895.361	-1.2028	0.07441	-16.1645	8.97909e-59	3.90177e-57
TAGLN	11746.8	-1.20304	0.0400954	-30.0045	8.57226e-198	3.12376e-195
FDXACB1	43.6284	-1.2077	0.291414	-4.14426	3.40911e-05	0.000126787
TOP2A	7807.75	-1.21075	0.035743	-33.8739	1.61564e-251	8.83116e-249
KRI1	482.989	-1.21327	0.0915167	-13.2573	4.09236e-40	1.00953e-38
HYLS1	19.5053	-1.21454	0.443632	-2.73772	0.00618665	0.0162415
LEF1	200.631	-1.21492	0.140879	-8.6238	6.47658e-18	6.43968e-17
BRIX1	1198.45	-1.2182	0.0630891	-19.3093	4.48945e-83	3.44097e-81
CHORDC1	3844.37	-1.21997	0.0458493	-26.6083	5.44856e-156	1.15482e-153
SPSB2	228.935	-1.22311	0.130556	-9.3685	7.35698e-21	8.54174e-20
MT-ATP8	10779.1	-1.22378	0.0382291	-32.0119	7.44833e-225	3.22311e-222
HSPA1L	35.2873	-1.22561	0.325484	-3.76552	0.000166204	0.000564088
TMEM163	17.4756	-1.22628	0.45824	-2.67606	0.00744934	0.0192474
PAK1IP1	861.266	-1.23271	0.0698114	-17.6577	8.88142e-70	4.89326e-68
EID2B	19.9899	-1.23413	0.421819	-2.92574	0.00343642	0.00946845
RHBG	34.7018	-1.23694	0.348682	-3.54748	0.000388932	0.00125132
TOMM40L	538.115	-1.23707	0.0875333	-14.1325	2.3943e-45	7.03423e-44
LIN28B	160.384	-1.23792	0.158852	-7.79293	6.54733e-15	5.45944e-14
TROAP	1031.81	-1.23943	0.0664218	-18.6599	1.04867e-77	7.30934e-76
TBC1D30	53.5603	-1.24124	0.266073	-4.66501	3.08599e-06	1.29519e-05
NHLRC1	14.0315	-1.2416	0.520544	-2.3852	0.0170697	0.0407908
NTHL1	332.613	-1.24459	0.112491	-11.0639	1.8783e-28	3.05037e-27
KRTCAP3	291.684	-1.24498	0.117264	-10.6169	2.48576e-26	3.69855e-25
RARB	22.0099	-1.24617	0.415129	-3.00188	0.00268317	0.00753238
EEF2KMT	165.674	-1.24646	0.156204	-7.97969	1.46706e-15	1.26968e-14
BEX3	2557.17	-1.24651	0.0459023	-27.1556	2.17179e-162	5.06857e-160
CD3EAP	189.331	-1.24784	0.155756	-8.0115	1.13318e-15	9.88958e-15
MRPL12	357.054	-1.25312	0.112076	-11.1809	5.05517e-29	8.43382e-28
RRP15	985.995	-1.25348	0.0694059	-18.0601	6.57229e-73	4.03885e-71
CYB5A	962.485	-1.25387	0.0721599	-17.3763	1.24815e-67	6.56335e-66
IPO4	24.9511	-1.25588	0.391395	-3.20874	0.00133317	0.00394013
FAM86C1	187.64	-1.25916	0.14299	-8.80592	1.29781e-18	1.35122e-17
WDR72	101.613	-1.26023	0.20064	-6.28103	3.36343e-10	2.04095e-09
BFSP1	232.374	-1.26382	0.135197	-9.34797	8.93461e-21	1.03215e-19
KLHL31	23.3841	-1.26502	0.395831	-3.19586	0.00139414	0.00410863
UBE2E3	24.9383	-1.2669	0.388427	-3.26161	0.0011078	0.00330701
KNSTRN	923.033	-1.27124	0.0698326	-18.2041	4.79143e-74	3.01584e-72
GCFC2	219.362	-1.27348	0.146548	-8.68986	3.62901e-18	3.68237e-17
FAM131B	494.519	-1.27806	0.0913711	-13.9876	1.85636e-44	5.30379e-43
HMGA2	887.1	-1.28248	0.0750541	-17.0874	1.84094e-65	9.32636e-64
GSTA4	233.236	-1.28628	0.142094	-9.05232	1.3996e-19	1.52444e-18
CCDC71L	33.204	-1.28857	0.350924	-3.67193	0.000240723	0.000796061
SCLY	44.9735	-1.28952	0.307262	-4.19681	2.70701e-05	0.000101732
C6orf52	23.8047	-1.29216	0.401062	-3.22184	0.00127369	0.00377887
EEF1E1	153.899	-1.29332	0.187345	-6.90343	5.07603e-12	3.53925e-11
ARHGAP4	136.731	-1.29443	0.165341	-7.82883	4.92437e-15	4.14273e-14
LGSN	93.0805	-1.2946	0.201502	-6.42475	1.32082e-10	8.28097e-10
MT-ND3	7063.76	-1.29575	0.0440546	-29.4124	3.80689e-190	1.29628e-187
HGH1	465.818	-1.29605	0.101427	-12.7782	2.16899e-37	4.90764e-36
ACTG2	54.751	-1.29878	0.279326	-4.64969	3.32432e-06	1.39045e-05
CHAC2	73.4601	-1.29894	0.226081	-5.74547	9.16686e-09	4.94686e-08
CATSPERB	16.6672	-1.30281	0.484153	-2.69091	0.0071258	0.0185012
AGMAT	1081.46	-1.30703	0.0644521	-20.2791	1.96881e-91	1.80151e-89
GUCA1B	12.0237	-1.31262	0.559519	-2.34598	0.0189773	0.0448694
LTV1	690.509	-1.31299	0.0783995	-16.7475	5.90875e-63	2.8214e-61
STEAP1	407.1	-1.31445	0.110719	-11.872	1.65455e-32	3.20286e-31
NEXN	91.5964	-1.31713	0.204636	-6.43646	1.2229e-10	7.69492e-10
ARHGAP28	1130.87	-1.31819	0.0663511	-19.8669	7.87496e-88	6.67636e-86
PNO1	950.184	-1.31846	0.0672731	-19.5986	1.58927e-85	1.29454e-83
CLDN2	162.121	-1.32286	0.156805	-8.43632	3.27475e-17	3.12735e-16
PTGIS	18.0046	-1.32518	0.485724	-2.72827	0.00636682	0.0166724
C12orf66	83.8729	-1.33741	0.222311	-6.01595	1.78829e-09	1.01627e-08
KRT23	64.3486	-1.34111	0.239081	-5.60944	2.02978e-08	1.05958e-07
PPP3CB	391.886	-1.34174	0.109865	-12.2126	2.66204e-34	5.45836e-33
STEAP1B	15.0582	-1.34347	0.496615	-2.70526	0.00682509	0.0177894
DLGAP5	1279.25	-1.34511	0.0607901	-22.1271	1.73255e-108	2.10449e-106
SVEP1	117.784	-1.34798	0.188802	-7.13966	9.35643e-13	6.88425e-12
ARSJ	95.8833	-1.3487	0.196999	-6.84622	7.58263e-12	5.21692e-11
ROR1	962.103	-1.34945	0.0720771	-18.7223	3.25474e-78	2.28392e-76
PRMT6	183.503	-1.35042	0.142932	-9.44796	3.45511e-21	4.0753e-20
MT-CO3	87858	-1.35123	0.0312611	-43.224	0	0
FEM1A	21.6374	-1.35349	0.416562	-3.24918	0.00115737	0.00345002
ZP3	15.8886	-1.35391	0.492995	-2.7463	0.0060271	0.0158617
ZBTB2	569.167	-1.35626	0.0883952	-15.3431	3.93919e-53	1.4637e-51
CCR1	31.9951	-1.35736	0.33839	-4.01124	6.04011e-05	0.000218038
LRRC61	238.115	-1.36132	0.127495	-10.6774	1.29891e-26	1.95505e-25
PIGW	548.872	-1.36422	0.0911453	-14.9676	1.19642e-50	4.10081e-49
UNC5CL	121.55	-1.36431	0.175509	-7.77347	7.63638e-15	6.34969e-14
POTEF	35.3707	-1.37002	0.328518	-4.1703	3.04199e-05	0.000113745
AURKA	3754.53	-1.37135	0.0442996	-30.9564	2.08426e-210	8.32543e-208
MAT1A	51.4868	-1.37165	0.281709	-4.86902	1.12151e-06	4.95005e-06
POLR3G	89.1118	-1.37218	0.213504	-6.42695	1.30189e-10	8.17459e-10
ERVMER34-1	1032.58	-1.37579	0.0685832	-20.0601	1.6475e-89	1.44389e-87
NEB	386.667	-1.37784	0.104941	-13.1296	2.22686e-39	5.33495e-38
GSTA2	256.923	-1.38226	0.123962	-11.1506	7.11123e-29	1.17601e-27
HGD	507.716	-1.38228	0.0937339	-14.7469	3.22179e-49	1.04562e-47
ATR	422.423	-1.38389	0.0975107	-14.1922	1.02433e-45	3.05255e-44
SHISA6	188.712	-1.38549	0.152418	-9.09004	9.90041e-20	1.0869e-18
CENPE	1015.07	-1.38628	0.0792798	-17.4859	1.83399e-68	9.76764e-67
SLC25A35	17.6851	-1.38769	0.47569	-2.91721	0.00353175	0.00971628
QTRT1	383.452	-1.39728	0.102886	-13.5809	5.19935e-42	1.38456e-40
NKPD1	80.9388	-1.39786	0.216802	-6.44764	1.13607e-10	7.1713e-10
COL26A1	268.716	-1.40295	0.139678	-10.0442	9.74312e-24	1.29644e-22
UFSP1	13.8405	-1.40666	0.542383	-2.59349	0.00950087	0.0239849
EDN3	926.559	-1.40821	0.0808431	-17.419	5.91788e-68	3.1198e-66
UTP20	1967.89	-1.41144	0.0527046	-26.7801	5.50796e-158	1.21708e-155
DKK1	13657.9	-1.41178	0.031439	-44.9052	0	0
PLP1	26.6506	-1.41261	0.38381	-3.6805	0.000232775	0.000772114
RRP9	852.092	-1.41292	0.0724094	-19.513	8.52104e-85	6.78124e-83
ADGRG5	85.7839	-1.41678	0.218726	-6.47741	9.33095e-11	5.92519e-10
DEPDC1	300.34	-1.41737	0.116778	-12.1373	6.69946e-34	1.35628e-32
TNFAIP8L1	270.569	-1.41824	0.12297	-11.5333	8.96797e-31	1.63255e-29
LRRC69	11.6104	-1.42195	0.5757	-2.46995	0.0135132	0.0329866
ARHGAP22	79.446	-1.43461	0.225129	-6.37241	1.86085e-10	1.1531e-09
HOXA9	92.4213	-1.43495	0.208105	-6.89534	5.37346e-12	3.7366e-11
MFSD3	131.323	-1.43568	0.179078	-8.01705	1.08319e-15	9.46928e-15
MRC2	149.839	-1.43601	0.168788	-8.50776	1.77328e-17	1.71235e-16
KCNK10	52.5539	-1.44604	0.271274	-5.33056	9.79077e-08	4.79972e-07
PPEF1	13.5434	-1.44805	0.519855	-2.78549	0.00534462	0.0142015
SUMO3	1429.48	-1.45258	0.061103	-23.7726	6.42279e-125	1.00307e-122
H1-0	5212.2	-1.46181	0.0429423	-34.0412	5.48535e-254	3.1649e-251
CDKN3	659.203	-1.4657	0.0800787	-18.3033	7.7912e-75	5.02581e-73
HPDL	944.293	-1.46702	0.0703325	-20.8583	1.28187e-96	1.28627e-94
ZNHIT2	83.4229	-1.46743	0.21864	-6.71164	1.92448e-11	1.29155e-10
FOXA1	1003.22	-1.46905	0.0665838	-22.0632	7.13684e-108	8.47081e-106
IQCK	34.2387	-1.47472	0.339561	-4.34303	1.40531e-05	5.46523e-05
FZD2	381.376	-1.47604	0.103297	-14.2893	2.55118e-46	7.69093e-45
NIPSNAP1	860.455	-1.47622	0.0820493	-17.9918	2.25871e-72	1.35204e-70
C17orf67	40.1559	-1.4839	0.312003	-4.75604	1.97425e-06	8.47081e-06
SCGN	95.2969	-1.49116	0.213043	-6.99933	2.57198e-12	1.83205e-11
CFAP45	23.3143	-1.49225	0.403894	-3.69466	0.000220181	0.000731974
SLC28A3	42.5786	-1.49872	0.316564	-4.73433	2.19784e-06	9.37205e-06
TPK1	670.665	-1.49891	0.0788373	-19.0127	1.33897e-80	9.86232e-79
KIF20A	2118.4	-1.50185	0.0522417	-28.7481	9.57752e-182	2.88311e-179
GSTA1	42.3467	-1.50384	0.311762	-4.82368	1.40931e-06	6.15492e-06
POTEE	14.0085	-1.50785	0.522825	-2.88405	0.00392592	0.0107156
FYB2	20.0858	-1.51502	0.443416	-3.4167	0.000633843	0.00197089
H1-2	74.0744	-1.53699	0.23959	-6.41507	1.40757e-10	8.7956e-10
CDC20	2062.7	-1.53734	0.0537178	-28.6187	3.92762e-180	1.16544e-177
APELA	146.031	-1.53752	0.172887	-8.89318	5.93847e-19	6.27087e-18
SOCS2	2069.42	-1.53885	0.0636877	-24.1624	5.53146e-129	8.97609e-127
DYNC1I1	114.252	-1.55103	0.191907	-8.0822	6.36105e-16	5.62715e-15
ARHGDIA	1302.96	-1.55406	0.0636029	-24.4339	7.47202e-132	1.28266e-129
SLC2A2	81.9708	-1.55909	0.21526	-7.24283	4.39433e-13	3.30466e-12
PTTG1	1303.43	-1.56592	0.0672027	-23.3015	4.28203e-120	6.44507e-118
PAMR1	180.745	-1.56612	0.152056	-10.2996	7.07371e-25	9.98152e-24
PSRC1	220.95	-1.57322	0.135767	-11.5876	4.76271e-31	8.73907e-30
VARS1	2331.45	-1.57562	0.049646	-31.7372	4.77209e-221	2.02288e-218
GRTP1	180.123	-1.57644	0.151484	-10.4067	2.31081e-25	3.33087e-24
ALG1L	19.3378	-1.57907	0.45046	-3.50546	0.000455827	0.00145326
CCNB1	4754.1	-1.58922	0.0384412	-41.3416	0	0
ADRA2A	32.0952	-1.59193	0.346292	-4.59709	4.28423e-06	1.76283e-05
CHI3L1	2506.27	-1.60602	0.0513232	-31.2923	5.94218e-215	2.4201e-212
ARHGEF39	370.206	-1.6151	0.108914	-14.8292	9.49102e-50	3.14698e-48
HMX2	12.7127	-1.6244	0.558854	-2.90667	0.00365299	0.0100246
CENPA	360.928	-1.63146	0.107562	-15.1677	5.79042e-52	2.05244e-50
HBQ1	24.7293	-1.63361	0.399562	-4.08849	4.34184e-05	0.000159336
HMMR	1425.09	-1.63663	0.0763808	-21.4273	7.44166e-102	8.26581e-100
GLB1L	27.2626	-1.64032	0.380995	-4.30535	1.6672e-05	6.44387e-05
PRMT3	617.925	-1.64438	0.0858537	-19.1533	9.08341e-82	6.86078e-80
MRVI1	12.3147	-1.65767	0.559741	-2.96149	0.00306155	0.00850266
TSACC	35.3221	-1.65827	0.341343	-4.85808	1.18531e-06	5.215e-06
CLMP	815.39	-1.66829	0.0758844	-21.9847	4.03508e-107	4.76208e-105
RRS1	402.892	-1.68596	0.101398	-16.6272	4.42842e-62	2.06239e-60
KCNJ8	1149.61	-1.69479	0.0662313	-25.589	2.02169e-144	3.92453e-142
OPN3	19.5565	-1.73007	0.445768	-3.88109	0.000103987	0.000363073
WDR4	390.205	-1.74588	0.109739	-15.9094	5.45631e-57	2.27576e-55
ADGRD2	13.0174	-1.75486	0.553245	-3.17194	0.00151425	0.00443554
PLK1	1579.22	-1.78729	0.0646125	-27.6616	2.02438e-168	5.32257e-166
CD28	7.0505	-1.79425	0.752804	-2.38342	0.0171524	0.0409556
DNAH12	39.5215	-1.80029	0.316135	-5.69469	1.23599e-08	6.59292e-08
SLC35D3	87.5083	-1.83271	0.218269	-8.39657	4.5972e-17	4.35225e-16
PCP4	15.9309	-1.84938	0.504801	-3.66358	0.000248715	0.000820399
HECTD2	10.2524	-1.86011	0.620197	-2.99923	0.00270666	0.00759113
CPS1	16.2178	-1.86955	0.542577	-3.44569	0.00056961	0.00178425
FJX1	200.232	-1.88912	0.158142	-11.9458	6.83254e-33	1.33508e-31
SLIT3	8.31645	-1.93225	0.695957	-2.77639	0.00549655	0.0145679
FUOM	442.126	-1.97157	0.103449	-19.0584	5.59292e-81	4.14895e-79
STX1B	5.43836	-1.98241	0.858479	-2.30921	0.0209319	0.0489945
H3C8	20.3414	-1.98276	0.447092	-4.43479	9.21599e-06	3.65455e-05
PIF1	353.031	-1.9886	0.110735	-17.9582	4.1426e-72	2.45145e-70
FO681492.1	7.01355	-1.98904	0.782854	-2.54075	0.0110615	0.0275159
H2BC12	100.236	-1.99227	0.204506	-9.74188	1.99814e-22	2.5002e-21
TDO2	18.7706	-1.99308	0.479848	-4.15357	3.27328e-05	0.000121932
CALHM5	11.0578	-2.00262	0.631962	-3.1689	0.00153018	0.00447968
NMNAT3	139.305	-2.01016	0.181711	-11.0624	1.90849e-28	3.09698e-27
HCRTR2	11.1484	-2.01303	0.610517	-3.29726	0.000976346	0.00293909
FSIP1	15.2564	-2.02315	0.528535	-3.82784	0.000129271	0.000445585
GLYATL1	30.437	-2.02612	0.378839	-5.34824	8.88119e-08	4.36412e-07
H2AC8	6.57698	-2.04228	0.809435	-2.5231	0.0116326	0.0287747
FABP5	177.496	-2.04246	0.155187	-13.1613	1.46593e-39	3.5571e-38
H2BC8	9.62725	-2.05421	0.689154	-2.98077	0.00287521	0.00801838
SOX2	276.499	-2.06803	0.128369	-16.1101	2.16823e-58	9.34363e-57
RPGRIP1	5.75152	-2.10332	0.851173	-2.47108	0.0134705	0.0328902
CNN1	21.8174	-2.10791	0.445923	-4.72709	2.27766e-06	9.69848e-06
SLC9A4	20.9708	-2.124	0.459285	-4.62458	3.75351e-06	1.56085e-05
H2AC11	15.3183	-2.13978	0.53224	-4.02034	5.81153e-05	0.000210152
NOX1	402.864	-2.14735	0.106138	-20.2317	5.15009e-91	4.67129e-89
ADH4	9.38921	-2.14941	0.666503	-3.2249	0.00126016	0.00374194
ANKRD31	21.2982	-2.1516	0.458136	-4.69641	2.64773e-06	1.11849e-05
CCDC184	7.88459	-2.15749	0.743418	-2.90212	0.00370647	0.0101593
GNB1L	99.9879	-2.16156	0.212118	-10.1904	2.18942e-24	3.02572e-23
NXPH1	17.6486	-2.21068	0.502669	-4.39789	1.09307e-05	4.30003e-05
RASSF10	6.37593	-2.2251	0.846232	-2.62942	0.00855305	0.0218223
FAM72A	32.8449	-2.26265	0.377838	-5.9884	2.1192e-09	1.19842e-08
CD96	5.4598	-2.27154	0.900453	-2.52266	0.0116472	0.0288072
HEPACAM2	10.001	-2.29967	0.693712	-3.31501	0.000916384	0.00277305
H4C9	84.7791	-2.32974	0.235781	-9.88095	5.03515e-23	6.52026e-22
H2AC6	33.738	-2.35947	0.375655	-6.28096	3.36499e-10	2.0413e-09
APOA5	9.87359	-2.39205	0.690556	-3.46395	0.000532297	0.00167747
GPR83	79.6467	-2.43375	0.245882	-9.89802	4.24607e-23	5.51564e-22
RASL11B	12.1864	-2.4516	0.613397	-3.99675	6.42178e-05	0.000230853
H2BC11	13.7205	-2.50395	0.579773	-4.31885	1.56846e-05	6.07922e-05
H3C10	8.34779	-2.53544	0.773225	-3.27905	0.00104159	0.00312145
APOBEC2	43.4118	-2.5579	0.353341	-7.23918	4.51411e-13	3.3935e-12
C12orf56	56.3831	-2.56082	0.295406	-8.66881	4.36661e-18	4.39858e-17
CHIT1	9.97222	-2.58011	0.690373	-3.73726	0.000186034	0.000626072
H2BC5	41.1736	-2.58202	0.351725	-7.34103	2.11963e-13	1.62581e-12
CXCL17	4.50479	-2.59757	1.03263	-2.51549	0.0118867	0.0293508
LNP1	16.8272	-2.61232	0.530733	-4.92211	8.56179e-07	3.82034e-06
AFM	8.56281	-2.76603	0.770736	-3.58882	0.000332176	0.00107605
PSG8	3.77084	-2.80316	1.16489	-2.40638	0.0161116	0.0387286
CLEC3A	7.87479	-2.90418	0.825829	-3.51668	0.00043698	0.00139596
MINAR1	6.64943	-2.90606	0.905794	-3.2083	0.0013352	0.00394557
CALHM4	4.45324	-3.07643	1.1079	-2.77681	0.00548953	0.0145517
SMIM24	4.50176	-3.08892	1.10554	-2.79405	0.00520531	0.013865
PRDM13	3.23773	-3.20832	1.33982	-2.39459	0.0166388	0.0398712
INMT	24.6714	-3.25361	0.495644	-6.56441	5.22381e-11	3.3844e-10
MEOX1	4.97979	-3.25836	1.09163	-2.98485	0.00283716	0.00792825
H2AC20	3.67712	-3.43331	1.32926	-2.58288	0.00979807	0.0246417
LIN28A	5.49882	-3.43361	1.07176	-3.20371	0.00135671	0.00400515
DHRS2	90.4956	-3.66796	0.283025	-12.9598	2.06709e-38	4.78125e-37
SYT14	2.45487	-3.74552	1.54817	-2.41932	0.0155495	0.0374773
GPRC6A	2.72595	-3.92997	1.51728	-2.59014	0.0095936	0.0241919
MYBPH	419.947	-4.07847	0.148602	-27.4456	7.8318e-166	1.9366e-163
AC013489.1	1.89124	-4.44557	1.65811	-2.6811	0.00733806	0.0189883

## Sheet: uCaco-2_CoCl2
The full list of differentially expressed genes in undifferentiated Caco-2 cells upon cobalt (II) chlolide treatment.
Gene Symbol	baseMean	log2FoldChange	lfcSE	stat	pvalue	padj
HSPA6	1812	11.9617	0.834519	14.3337	1.34762e-46	1.18483e-45
NR1H4	54.782	9.35091	1.20033	7.7903	6.68523e-15	2.77165e-14
MMP13	34.478	8.6855	1.21215	7.16534	7.75911e-13	2.99565e-12
CCL26	168.76	8.52794	0.84588	10.0817	6.65376e-24	3.6076e-23
H1-6	24.1627	8.17272	1.22635	6.66426	2.6601e-11	9.67631e-11
SLC36A2	21.5434	8.0143	1.23495	6.48957	8.60808e-11	3.06753e-10
HSPA1A	42555.9	7.2463	0.0542658	133.534	0	0
SPANXN5	12.4437	7.22043	1.2716	5.67823	1.36096e-08	4.38745e-08
TEX13C	12.3087	7.19838	1.27146	5.6615	1.50058e-08	4.83025e-08
RAI2	11.364	7.08475	1.27877	5.54027	3.02007e-08	9.56268e-08
TP63	20.596	6.96617	1.23463	5.64234	1.67757e-08	5.38446e-08
C11orf86	9.25971	6.78256	1.30627	5.19232	2.07687e-07	6.27796e-07
SSX1	8.02082	6.58159	1.32268	4.97595	6.49279e-07	1.90688e-06
CFP	7.5972	6.51372	1.33188	4.89064	1.0051e-06	2.91577e-06
HSPA1B	13217.6	6.49729	0.0625615	103.854	0	0
KRT14	14.8001	6.48209	1.25821	5.15185	2.57927e-07	7.76461e-07
APBB1IP	7.5039	6.47575	1.33237	4.86033	1.1719e-06	3.38627e-06
CDKN1C	850.178	6.46025	0.197809	32.659	5.97428e-234	4.17239e-232
CALB1	14.3815	6.44238	1.25895	5.11725	3.10019e-07	9.28987e-07
ARC	65.3799	6.42078	0.680234	9.43908	3.76056e-21	1.89367e-20
HTRA3	89.6014	6.38322	0.575267	11.0961	1.31041e-28	7.92528e-28
TNFSF9	397.3	6.3829	0.277051	23.0387	1.90773e-117	4.48565e-116
FAM153A	6.69423	6.32426	1.34607	4.69833	2.62298e-06	7.40953e-06
KRT16	6.67657	6.30277	1.35434	4.65375	3.25957e-06	9.15819e-06
ZFAND2A	10142.1	6.28701	0.0700733	89.7204	0	0
CCN2	4079.83	6.24066	0.134012	46.5679	0	0
ACTN2	22.8412	6.21908	1.08236	5.74585	9.14588e-09	2.97295e-08
CLEC7A	5.38666	6.02385	1.40077	4.30038	1.70504e-05	4.54407e-05
APOBEC3A	10.5561	5.99332	1.28549	4.6623	3.12702e-06	8.79417e-06
PLXDC1	19.1024	5.96496	1.09254	5.45969	4.76962e-08	1.49731e-07
SYN3	28.4043	5.94447	0.891886	6.66506	2.64564e-11	9.62522e-11
BBOX1	4.78856	5.85122	1.42035	4.11956	3.79596e-05	9.86119e-05
RCSD1	9.35763	5.82239	1.30157	4.47336	7.70007e-06	2.10521e-05
TCN1	9.37165	5.80804	1.30397	4.45411	8.42407e-06	2.29513e-05
H3-4	4.57788	5.76325	1.42368	4.04814	5.16254e-05	0.000132688
SPANXN1	4.50783	5.75937	1.42455	4.04295	5.27836e-05	0.000135501
GCKR	49.1915	5.73389	0.636568	9.0075	2.10801e-19	1.00724e-18
CCDC73	4.40668	5.73369	1.43621	3.99224	6.54509e-05	0.000166761
CSF3	4.47394	5.72426	1.43413	3.99145	6.56715e-05	0.000167269
PRR20G	4.28371	5.67617	1.43541	3.95439	7.67288e-05	0.000194294
C4orf47	4.15426	5.64161	1.44208	3.91215	9.1478e-05	0.000229856
PRR9	8.42135	5.64055	1.33946	4.21106	2.54173e-05	6.68132e-05
CCR4	8.26501	5.63133	1.31471	4.28333	1.84118e-05	4.89356e-05
KCNN2	4.1394	5.62202	1.44904	3.87983	0.00010453	0.000261392
TRIM54	106.135	5.61897	0.420742	13.3549	1.10913e-40	8.69877e-40
OTOP2	7.76854	5.55424	1.32373	4.19591	2.71783e-05	7.13146e-05
GPR183	7.50172	5.49925	1.34013	4.10352	4.06917e-05	0.000105406
LAMA2	13.5342	5.46817	1.12575	4.85734	1.18974e-06	3.4357e-06
LY9	7.32119	5.4603	1.34586	4.0571	4.9685e-05	0.000127883
ANXA10	3.764	5.45854	1.51531	3.60226	0.000315468	0.000757472
TDRD9	20.2011	5.43834	0.91931	5.91568	3.30516e-09	1.09857e-08
VSX2	3.56312	5.4271	1.49116	3.63951	0.000273155	0.000659315
FOSB	299.834	5.4252	0.242277	22.3925	4.65674e-111	1.02992e-109
HS6ST3	7.14071	5.40919	1.33873	4.04054	5.33287e-05	0.000136796
C17orf99	3.49165	5.38587	1.50662	3.57481	0.000350479	0.000837594
SERPINB5	7.00567	5.37076	1.35627	3.95994	7.49676e-05	0.000189957
DPEP2	6.66421	5.32434	1.3805	3.85683	0.000114866	0.000286597
CXCL11	6.64608	5.31933	1.35164	3.93546	8.30379e-05	0.000209591
LSMEM1	278.439	5.27866	0.24347	21.6809	3.1045e-104	6.40724e-103
CYP4F11	6.4809	5.27069	1.35185	3.89886	9.66449e-05	0.000242397
HSPB6	3.26473	5.25976	1.53893	3.41781	0.000631283	0.00146337
RAB6D	3.13111	5.21279	1.52235	3.42418	0.000616655	0.00143116
ERN2	3.05827	5.18667	1.5243	3.40266	0.00066734	0.00154284
GZMM	6.05031	5.17411	1.35898	3.80734	0.00014047	0.000347928
KRT34	11.2949	5.16698	1.15414	4.47692	7.57276e-06	2.07136e-05
FGF8	2.98542	5.16019	1.53157	3.36921	0.000753841	0.00173292
RADIL	27.9583	5.15197	0.721187	7.14374	9.08256e-13	3.49453e-12
USP17L2	2.99886	5.14416	1.54446	3.33072	0.000866204	0.00197708
VEGFD	16.4497	5.13919	0.931977	5.51429	3.50187e-08	1.1042e-07
CEACAM20	2.88427	5.12149	1.5512	3.30162	0.000961274	0.00218451
GADD45G	696.33	5.09931	0.14911	34.1983	2.56712e-256	2.11369e-254
SRRM4	2.91116	5.09295	1.61581	3.15195	0.00162182	0.00359475
ZEB1	5.75055	5.08479	1.38068	3.68282	0.000230665	0.00056004
HMOX1	17993.8	5.08285	0.0433169	117.341	0	0
CDKN1A	1223.05	5.08068	0.110936	45.7985	0	0
DRC1	15.6586	5.06426	0.948447	5.33953	9.31885e-08	2.8724e-07
C9	10.3725	5.06196	1.14439	4.4233	9.72059e-06	2.63581e-05
GRM3	2.76409	5.05487	1.56066	3.23893	0.0011998	0.00269963
DKK4	5.59359	5.05454	1.37969	3.66354	0.000248755	0.000602653
PCK1	5.53618	5.03975	1.37997	3.65208	0.000260125	0.000629159
TUBB3	369.262	5.03908	0.198976	25.3251	1.69192e-141	5.09662e-140
C9orf131	2.7613	5.03216	1.56469	3.21608	0.00129955	0.00291318
CRYAB	157.972	5.03129	0.294012	17.1125	1.19723e-65	1.46936e-64
NANOGNB	2.70332	5.03043	1.6141	3.11656	0.00182973	0.00402895
ZFP28	2.74923	5.02552	1.57219	3.1965	0.00139104	0.00310759
SPANXN3	5.47341	5.01872	1.38251	3.63015	0.000283257	0.000682784
CCDC152	10.1416	5.01111	1.1441	4.37994	1.18713e-05	3.20307e-05
BTLA	2.70469	5.00782	1.56701	3.19578	0.00139452	0.00311507
PLIN1	5.43224	5.00652	1.38875	3.60506	0.000312084	0.000749807
AKNAD1	2.68845	5.0025	1.56794	3.19049	0.00142032	0.00316939
GLRA4	2.63185	4.97774	1.57571	3.15904	0.00158291	0.00351314
KRTAP4-4	2.65736	4.96692	1.5899	3.12405	0.00178379	0.00393258
SRGN	9.83669	4.96185	1.15492	4.29625	1.73712e-05	4.6264e-05
MLLT11	393.338	4.95831	0.183633	27.0012	1.42992e-160	5.22657e-159
AL049844.1	2.62905	4.95389	1.5869	3.12174	0.00179783	0.00396243
AL136531.2	9.57025	4.94207	1.15395	4.28273	1.84618e-05	4.90573e-05
TRPM5	2.52653	4.93383	1.63285	3.0216	0.00251442	0.00543909
SDCBP2	342.839	4.92829	0.194502	25.3379	1.22026e-141	3.68529e-140
FCGR1A	2.45785	4.90034	1.63053	3.00536	0.00265269	0.00572027
SYT11	18.2515	4.8708	0.822885	5.91918	3.23556e-09	1.0762e-08
ZNF280A	1659.68	4.86657	0.0938615	51.8484	0	0
RAB34	8.75815	4.84317	1.195	4.05287	5.05931e-05	0.00013012
LDLRAD4	13.3505	4.83268	0.95275	5.07234	3.92944e-07	1.16986e-06
FOS	1161.95	4.82637	0.115598	41.7515	0	0
BTK	8.90684	4.82219	1.16253	4.14802	3.35366e-05	8.74314e-05
CBR3	17.5733	4.82148	0.84218	5.725	1.03434e-08	3.35106e-08
CCDC70	2.33488	4.79742	1.61778	2.96543	0.00302262	0.00647042
MYPN	4.59089	4.78347	1.4158	3.37863	0.000728492	0.00167701
SAMD11	4.66014	4.78336	1.41036	3.39159	0.000694881	0.00160303
CCR2	4.62161	4.77303	1.41417	3.37515	0.000737748	0.00169742
CCR7	4.64191	4.76944	1.4259	3.34486	0.000823235	0.00188413
NLRP4	12.7381	4.74334	0.968475	4.89775	9.69419e-07	2.814e-06
KRT3	12.6504	4.73982	0.956722	4.95423	7.2618e-07	2.12635e-06
H2BC8	182.084	4.71258	0.259802	18.1391	1.56507e-73	2.14145e-72
CTRB2	2.14465	4.7033	1.68595	2.78971	0.0052755	0.0109398
CD53	2.14186	4.67617	1.65419	2.82686	0.00470064	0.00979969
ZC3H11A	20.0734	4.66921	0.749248	6.23186	4.60931e-10	1.59249e-09
NYAP2	7.87431	4.6441	1.18073	3.93326	8.38023e-05	0.000211407
NAP1L2	7.85202	4.63649	1.18011	3.92885	8.5352e-05	0.00021527
TCAF2	11.805	4.63639	0.962873	4.81516	1.47079e-06	4.22236e-06
AL031777.2	4.18719	4.62066	1.43586	3.21806	0.00129062	0.00289373
MYCT1	2.02864	4.61175	1.72547	2.67275	0.00752325	0.0152756
OR2B6	7.68451	4.59583	1.1906	3.8601	0.000113342	0.000282885
CD300LB	2.03791	4.59141	1.6801	2.73282	0.00627943	0.0128873
SHISAL1	1.96786	4.5808	1.72129	2.66126	0.00778477	0.0157766
AKR1C2	1300.21	4.57392	0.0991245	46.1432	0	0
MTRNR2L3	7.60296	4.56934	1.19118	3.83598	0.000125064	0.000310916
KLK11	2.02305	4.55611	1.76158	2.58638	0.00969902	0.0193519
KRT72	2.00682	4.54706	1.7463	2.60383	0.00921885	0.018455
MAFB	70.0624	4.53863	0.38875	11.6749	1.71189e-31	1.10664e-30
SELENOM	25.4984	4.5361	0.639154	7.09704	1.27456e-12	4.87354e-12
MMP12	1.90846	4.51691	1.71509	2.63363	0.00844773	0.0170115
OR6J1	1.90846	4.51691	1.71509	2.63363	0.00844773	0.0170115
OPN1SW	3.88199	4.51478	1.464	3.08387	0.0020433	0.0044686
PKD2L1	3.87598	4.51478	1.46431	3.08321	0.00204783	0.0044781
CLEC4C	1.89222	4.50947	1.7094	2.63804	0.00833866	0.0168135
C22orf42	1.93397	4.50231	1.72433	2.61105	0.00902644	0.0181069
ARMH4	1.86392	4.49186	1.72096	2.61009	0.00905188	0.0181533
KRT6A	120.366	4.48231	0.291152	15.3951	1.76563e-53	1.75561e-52
CILP	3.71902	4.47042	1.4661	3.04919	0.0022946	0.0049844
WFIKKN2	1.81938	4.46537	1.75143	2.54956	0.0107859	0.0213677
INSM2	7.11481	4.46261	1.20559	3.70161	0.000214236	0.000521718
AKR1C1	1495.61	4.46116	0.0875382	50.9624	0	0
GCK	1.83282	4.44048	1.73258	2.56293	0.0103794	0.0206269
IL1A	20.365	4.42846	0.698282	6.34193	2.26909e-10	7.9484e-10
UGT2B17	1.80035	4.42463	1.75813	2.51667	0.011847	0.0233028
HSPB3	1.80452	4.42253	1.76545	2.50505	0.0122435	0.0240223
GLRA1	3.63051	4.42061	1.47015	3.00692	0.00263909	0.00569356
TNFRSF8	3.61149	4.39725	1.4697	2.99193	0.00277216	0.00596584
KPRP	1.74374	4.3873	1.7457	2.51321	0.0119638	0.0235089
POU1F1	1.74374	4.3873	1.7457	2.51321	0.0119638	0.0235089
C11orf91	1.73167	4.37622	1.78475	2.452	0.0142063	0.0275691
ARG1	1.75718	4.36067	1.77619	2.45507	0.0140858	0.0273577
DHH	1.75718	4.36067	1.77619	2.45507	0.0140858	0.0273577
RHOH	1.74095	4.35265	1.79067	2.43074	0.0150681	0.0291067
GDF3	1.68713	4.34863	1.77562	2.44908	0.0143223	0.0277712
GP6	3.43749	4.3411	1.48249	2.92825	0.00340874	0.00725595
FABP4	1.67089	4.33973	1.78746	2.42787	0.0151878	0.0293138
NLRP1	12.8992	4.33458	0.863585	5.01928	5.18645e-07	1.53262e-06
SULF1	1.71264	4.33186	1.7706	2.44655	0.0144231	0.0279504
IFI16	1.65883	4.32786	1.81553	2.3838	0.0171351	0.0326851
KCNJ2	1.69641	4.32419	1.80293	2.39843	0.0164657	0.0315235
MRO	15.938	4.32136	0.769157	5.61831	1.92837e-08	6.17006e-08
VAV3	6.38021	4.32072	1.2195	3.54301	0.000395584	0.000938698
CCL15	1.64259	4.31964	1.80051	2.39913	0.0164342	0.031471
ANGPT2	31.8631	4.31835	0.548792	7.86882	3.57994e-15	1.49585e-14
AOAH	1.6681	4.30332	1.77805	2.42025	0.01551	0.0298619
GPR152	1.6398	4.28301	1.77461	2.41349	0.0158007	0.030347
KCNS3	1.6398	4.28301	1.77461	2.41349	0.0158007	0.030347
VNN1	1.6398	4.28301	1.77461	2.41349	0.0158007	0.030347
TMEM156	3.30524	4.27596	1.49727	2.85583	0.0042924	0.00900137
C3AR1	3.35906	4.27561	1.50093	2.84864	0.00439061	0.00919173
H2BC18	12.0932	4.26344	0.880329	4.84301	1.2789e-06	3.68546e-06
HTR7	1.61149	4.26271	1.78781	2.38432	0.0171107	0.0326438
TUSC3	1.61149	4.26271	1.78781	2.38432	0.0171107	0.0326438
EID3	24.4569	4.26006	0.615644	6.91968	4.52663e-12	1.69251e-11
RASEF	1.65324	4.25949	1.86981	2.27803	0.0227245	0.0422916
FNDC11	1.59526	4.25374	1.79105	2.37501	0.0175487	0.0334142
H2BC21	127.892	4.24939	0.272358	15.6022	7.0309e-55	7.15779e-54
NR4A2	96.5534	4.24329	0.312415	13.5822	5.10668e-42	4.12649e-41
A2ML1	1.58319	4.24197	1.82339	2.32642	0.019996	0.0376375
AC010132.3	6.02246	4.23487	1.23878	3.41859	0.000629465	0.00145959
BNIP3L	1521.52	4.23296	0.0836761	50.5875	0	0
MYBPC1	5.9046	4.22796	1.23644	3.41945	0.000627475	0.00145541
TNNC2	1.6087	4.22615	1.84615	2.28917	0.0220698	0.0411742
APOL3	1.53865	4.21163	1.81514	2.32028	0.0203256	0.0381965
NPIPB12	3.21138	4.20818	1.52298	2.76313	0.00572496	0.0118092
H2BC17	14.7219	4.1959	0.785265	5.34329	9.12741e-08	2.81524e-07
CCK	29.2138	4.19308	0.558686	7.50525	6.13107e-14	2.46313e-13
GCNT3	963.052	4.1927	0.101714	41.2205	0	0
KRT6C	1.51034	4.18926	1.85482	2.25857	0.02391	0.044308
CPEB2	3.12646	4.17706	1.56639	2.66668	0.00766045	0.0155368
F2RL2	8.63257	4.15641	1.01017	4.11456	3.87919e-05	0.00010064
CYP3A7	3.0077	4.15558	1.53434	2.70838	0.0067612	0.013824
GDF9	62.9275	4.15352	0.387403	10.7215	8.07223e-27	4.68869e-26
DDIT4	647.694	4.15148	0.123537	33.6052	1.40619e-247	1.09627e-245
TBR1	8.49199	4.1318	1.03085	4.00816	6.11944e-05	0.00015634
PPP1R27	16.6699	4.10903	0.721929	5.69174	1.2575e-08	4.06007e-08
NPBWR1	1.44677	4.1066	1.85027	2.21946	0.0264552	0.0486404
YPEL5	3030.08	4.10641	0.0665723	61.6834	0	0
RBM24	5.51297	4.10425	1.24996	3.28351	0.00102524	0.00232275
HBP1	2272.65	4.09865	0.0732824	55.9295	0	0
KRT37	2.89089	4.08214	1.53489	2.65957	0.00782412	0.0158523
CREBRF	1178.85	4.07675	0.0926474	44.0028	0	0
OSGIN1	3483.57	4.06179	0.0591084	68.7176	0	0
MPZ	32.4472	4.06178	0.511638	7.93878	2.04187e-15	8.6038e-15
MAFF	1980.84	4.05946	0.135234	30.0181	5.69568e-198	2.89924e-196
CCDC181	2.8881	4.05739	1.53241	2.64773	0.00810353	0.0163745
TEX19	144.38	4.05572	0.242988	16.691	1.52437e-62	1.77523e-61
ZMYND10	5.43464	4.04989	1.25243	3.23362	0.00122233	0.00274744
TBX10	2.81189	4.03537	1.5539	2.59693	0.00940623	0.0188092
ITK	5.23239	4.0188	1.2581	3.19434	0.00140151	0.00313039
CTRB1	2.72617	3.99301	1.56307	2.5546	0.0106311	0.0210896
SCARA5	2.69867	3.98606	1.55808	2.55831	0.0105181	0.0208831
YPEL2	371.827	3.98585	0.152566	26.1253	1.87888e-150	6.15778e-149
RNF212	2.75665	3.9854	1.59945	2.49174	0.012712	0.0248957
PTGER4	5.19987	3.97473	1.32174	3.00719	0.00263671	0.00568895
IDI2	2.67036	3.97302	1.57091	2.52912	0.011435	0.0225567
SPP1	12.3909	3.95411	0.818972	4.82814	1.37812e-06	3.9631e-06
FBXO32	9.93323	3.94947	0.909002	4.34484	1.39375e-05	3.73779e-05
H2BC4	60.0406	3.94459	0.371619	10.6146	2.54893e-26	1.46421e-25
HMCN1	7.37022	3.93478	1.06907	3.68057	0.000232717	0.000564848
H3C12	7.47453	3.93083	1.04312	3.76835	0.000164329	0.000404632
FAM166A	9.91851	3.92869	0.927581	4.23542	2.28125e-05	6.01616e-05
MYO3B	7.43558	3.92355	1.04331	3.76068	0.000169455	0.000416642
DENND2C	124.968	3.92085	0.255169	15.3657	2.77979e-53	2.75583e-52
MAP1A	402.467	3.92058	0.151686	25.8468	2.64453e-147	8.38602e-146
PKD1L3	7.38673	3.91737	1.04497	3.74877	0.000177703	0.000435872
POU4F3	2.59056	3.91721	1.58894	2.46529	0.0136901	0.0266489
GFPT2	99.9868	3.91655	0.28182	13.8974	6.57258e-44	5.48478e-43
IL16	2.53916	3.8839	1.61343	2.40723	0.0160743	0.0308269
TLR4	2.53732	3.88313	1.58388	2.45166	0.0142198	0.0275884
PAX6	2.50485	3.87034	1.61206	2.40087	0.0163561	0.0313316
CALHM3	2.51502	3.86892	1.60298	2.41358	0.0157968	0.030347
KCNK1	4.7424	3.86462	1.28225	3.01393	0.00257888	0.00557136
ASIC4	2.47734	3.86346	1.5947	2.42269	0.0154062	0.0296918
POU3F1	4.81846	3.86199	1.28203	3.0124	0.00259193	0.00559593
SLA2	9.43685	3.86198	0.902653	4.27848	1.88175e-05	4.99684e-05
NPHS1	2.54053	3.85481	1.58003	2.43971	0.0146992	0.0284413
ABCA13	4.61375	3.85068	1.2843	2.99826	0.00271523	0.00584815
SNAI1	1129.23	3.84718	0.098237	39.1622	0	0
DEDD2	3390.15	3.84547	0.0577737	66.561	0	0
CIART	258.277	3.82771	0.178779	21.4103	1.07131e-101	2.13225e-100
GABARAPL1	11372.3	3.82558	0.0426258	89.7478	0	0
GAST	4.62624	3.81847	1.29313	2.9529	0.00314805	0.00672727
C5orf49	6.83492	3.81479	1.05711	3.60868	0.000307756	0.000739635
CCDC81	116.091	3.80951	0.270028	14.1078	3.39801e-45	2.90589e-44
SDS	2.47696	3.80235	1.63551	2.32487	0.020079	0.0377785
KCNS1	40.6724	3.79976	0.428897	8.85937	8.04688e-19	3.76602e-18
CABP7	20.1173	3.79218	0.612983	6.18644	6.15372e-10	2.11178e-09
NGFR	15.7372	3.79082	0.698878	5.42416	5.82286e-08	1.81798e-07
ECT2L	2.44866	3.78616	1.61071	2.35062	0.0187422	0.0354709
GADD45B	1694.32	3.78261	0.081375	46.4836	0	0
MIOX	2.35716	3.78082	1.60555	2.35484	0.0185305	0.0351156
C11orf96	8.89446	3.77735	0.918978	4.11038	3.95011e-05	0.00010239
AC104389.5	6.87918	3.77471	1.07876	3.49913	0.000466784	0.00109843
KLHL24	637.945	3.77355	0.112387	33.5764	3.70933e-247	2.88222e-245
ATP6V0C	19.7486	3.76328	0.613063	6.13848	8.33143e-10	2.84289e-09
SYT2	30.5388	3.76059	0.497048	7.56586	3.85305e-14	1.55647e-13
BNIP3	1957.93	3.75874	0.0697684	53.8746	0	0
NRIP3	1249.71	3.75212	0.0886217	42.3385	0	0
ELL3	2.31599	3.75115	1.62299	2.31125	0.0208188	0.0390391
HEY1	26.3975	3.74879	0.530166	7.07098	1.53838e-12	5.86187e-12
TPH2	2.29975	3.74403	1.63763	2.28625	0.0222395	0.0414578
LYVE1	8.65827	3.72979	0.922308	4.04398	5.25524e-05	0.000134923
PYGM	49.5681	3.72548	0.385241	9.67052	4.02319e-22	2.07993e-21
FOSL1	1846.24	3.71832	0.0759107	48.9828	0	0
FGF1	2.28152	3.71423	1.61157	2.30472	0.0211822	0.0396602
FRZB	4.3475	3.70973	1.29396	2.86695	0.00414444	0.00870901
WNT16	8.45383	3.70313	0.933604	3.96649	7.29373e-05	0.000184992
OLFM4	2.26865	3.69917	1.61142	2.2956	0.0216986	0.0405366
SAT1	10315.2	3.68987	0.0597216	61.7845	0	0
NCF2	87.8315	3.68573	0.295064	12.4913	8.32902e-36	5.91194e-35
NDRG1	2376.48	3.68284	0.0697002	52.8383	0	0
MAFA	12.7013	3.68245	0.754477	4.8808	1.05658e-06	3.06094e-06
TDGF1	2.22411	3.67732	1.62586	2.26176	0.0237121	0.0440002
IRS2	553.314	3.66891	0.120848	30.3596	1.87405e-202	9.90461e-201
BAG3	5621.68	3.66256	0.0511784	71.5645	0	0
RND1	268.9	3.63866	0.164942	22.0602	7.62405e-108	1.65042e-106
TMEM31	4.10667	3.63391	1.31957	2.75385	0.00588984	0.0121376
RNF223	24.6878	3.6337	0.547459	6.63739	3.1929e-11	1.15803e-10
ZFP36	1707.42	3.6316	0.0789717	45.9861	0	0
GALR2	18.0755	3.631	0.633111	5.73518	9.74113e-09	3.16075e-08
COX7A1	4.03789	3.62771	1.31163	2.76579	0.00567848	0.0117185
TLR6	6.09667	3.62743	1.09115	3.32441	0.000886069	0.00202045
GCNA	287.153	3.6259	0.167703	21.621	1.13984e-103	2.32789e-102
CTH	595.957	3.62321	0.113096	32.0366	3.36873e-225	2.1423e-223
SUMO4	13.9022	3.60893	0.710713	5.07789	3.81645e-07	1.13709e-06
TXK	31.804	3.59798	0.46862	7.67783	1.61807e-14	6.61608e-14
CHGA	5.94881	3.59724	1.08442	3.31719	0.00090927	0.00207094
CPA4	55.7189	3.5922	0.357366	10.0519	9.01201e-24	4.86151e-23
RASD1	1223.45	3.58005	0.0873964	40.9634	0	0
HRG	15.8762	3.57752	0.666699	5.36602	8.04943e-08	2.49193e-07
RIT1	1836.4	3.57034	0.0752612	47.4392	0	0
FTL	162558	3.56472	0.046839	76.1057	0	0
LYG1	23.081	3.55238	0.546803	6.49663	8.21417e-11	2.92983e-10
HYPK	82.3353	3.54917	0.292681	12.1264	7.6535e-34	5.22997e-33
ZNF385B	11.4614	3.54194	0.767272	4.61627	3.90691e-06	1.08987e-05
XIRP1	3.8045	3.53945	1.32384	2.67362	0.00750379	0.0152401
ENPP2	3.93452	3.53721	1.33186	2.65585	0.00791092	0.0160198
GCLM	2168.87	3.53449	0.0634358	55.7176	0	0
AKR1B15	5.76005	3.53421	1.10065	3.21101	0.00132271	0.00296284
NRAP	11.3704	3.53378	0.768031	4.60109	4.20294e-06	1.16939e-05
PPP1R15A	10013.5	3.51754	0.0514392	68.3823	0	0
CABP4	3.79489	3.50406	1.34725	2.60089	0.00929814	0.0186058
MAP1LC3B	8243.2	3.48045	0.0461396	75.433	0	0
CREM	880.25	3.47789	0.0945072	36.8003	1.8258e-296	1.97439e-294
CAPNS2	16.4533	3.47266	0.630475	5.50801	3.62914e-08	1.14357e-07
GFAP	3.57716	3.45738	1.34328	2.57383	0.0100579	0.0200305
ARRDC3	1972.21	3.45394	0.0716041	48.2366	0	0
GPR55	3.53062	3.44592	1.36923	2.51668	0.0118466	0.0233028
HTR2B	3.60267	3.44553	1.34528	2.5612	0.0104313	0.0207195
NHLH1	12.5631	3.43842	0.716192	4.80098	1.57894e-06	4.52177e-06
PMAIP1	58.3058	3.42099	0.335816	10.1871	2.26467e-24	1.24456e-23
GEM	360.422	3.41777	0.143371	23.8386	1.33099e-125	3.40973e-124
SLC7A11	1815.79	3.41707	0.0714479	47.8261	0	0
FAM209A	3.52576	3.40834	1.35021	2.5243	0.011593	0.0228356
AC027644.4	3.44955	3.40667	1.39507	2.44194	0.0146087	0.0282892
DNAJB1	12405	3.39225	0.0507692	66.8172	0	0
JAZF1	8.60372	3.3919	0.882571	3.8432	0.00012144	0.000302325
MAFG	4226.87	3.39189	0.0535107	63.387	0	0
NIM1K	10.3802	3.38634	0.783914	4.31979	1.56177e-05	4.17171e-05
THSD1	15.6545	3.38336	0.659173	5.13273	2.85567e-07	8.56812e-07
CNTN2	5.00664	3.38232	1.16468	2.90406	0.00368354	0.00780337
ZFP2	5.16881	3.38137	1.1053	3.05924	0.00221897	0.00482893
DNAJA4	142.956	3.36905	0.214111	15.7351	8.69251e-56	8.99773e-55
KDM3A	6111.48	3.36585	0.0474806	70.8891	0	0
LDHAL6B	3.47237	3.35856	1.36977	2.45191	0.01421	0.0275739
PNPLA8	1806.49	3.35129	0.0760603	44.061	0	0
PLK2	2715.66	3.34863	0.0717924	46.6433	0	0
GLA	5605.63	3.34831	0.0462154	72.4501	0	0
MXD1	962.068	3.34539	0.0915022	36.5608	1.20119e-292	1.25835e-290
SERPINB2	3.27682	3.3429	1.40752	2.37502	0.0175478	0.0334142
ATP8A2	3.39351	3.3416	1.36131	2.45469	0.0141005	0.0273841
IER5L	172.921	3.33569	0.378234	8.8191	1.15383e-18	5.37217e-18
ADM	5475.57	3.33198	0.0607372	54.859	0	0
CD163L1	8.18473	3.32969	0.886789	3.75477	0.000173498	0.000426091
PIK3IP1	44.6505	3.32827	0.382675	8.69738	3.39639e-18	1.56182e-17
ZNF382	16.4239	3.32478	0.633949	5.24455	1.56662e-07	4.76936e-07
ZNF699	16.5339	3.31609	0.625491	5.30157	1.14811e-07	3.52638e-07
CRYBA4	10.0532	3.31181	0.796861	4.15607	3.23772e-05	8.44839e-05
STYK1	551.91	3.30594	0.111744	29.5851	2.32353e-192	1.1312e-190
RIOK3	2603.92	3.30208	0.060717	54.3847	0	0
PNLDC1	18.1776	3.29744	0.593435	5.55653	2.75194e-08	8.72897e-08
LRRC43	6.60592	3.2974	0.983399	3.35307	0.000799216	0.0018322
FLT1	11.5799	3.29574	0.745481	4.42096	9.82642e-06	2.66267e-05
KRTAP2-3	72.1942	3.29037	0.299913	10.9711	5.26413e-28	3.14321e-27
SLC5A11	22.8051	3.29011	0.518496	6.34549	2.21717e-10	7.7712e-10
MAP1B	17.9259	3.27353	0.586925	5.57742	2.44107e-08	7.76709e-08
TCP11L2	149.535	3.26756	0.205682	15.8865	7.8622e-57	8.28816e-56
TMEM88	6.39903	3.26189	0.984067	3.31471	0.000917389	0.00208842
H3C2	10.9972	3.26183	0.761005	4.28621	1.81744e-05	4.83264e-05
H2AC16	4.79421	3.25224	1.15856	2.80714	0.0049984	0.0103946
B3GNT4	129.835	3.24557	0.223393	14.5286	7.98826e-48	7.17659e-47
TXNRD1	17401.8	3.24546	0.0401617	80.8099	0	0
CPA5	4.69184	3.24423	1.15344	2.81266	0.00491335	0.0102259
SLC17A8	3.20176	3.24324	1.41185	2.29715	0.0216104	0.0403877
SRXN1	121.597	3.24036	0.240755	13.4591	2.7203e-41	2.16095e-40
JUNB	740.951	3.23067	0.0989995	32.6332	1.38607e-233	9.59452e-232
DGKG	12.4642	3.22958	0.696026	4.64003	3.48364e-06	9.75967e-06
SGK2	69.3521	3.22669	0.30126	10.7106	9.07303e-27	5.26478e-26
ZSWIM6	1811.92	3.22096	0.0730624	44.085	0	0
MEGF11	32.8307	3.21998	0.428849	7.50843	5.98395e-14	2.40609e-13
CNTN5	4.689	3.21481	1.13202	2.83988	0.00451306	0.00943544
CCNG2	745.703	3.2133	0.100835	31.8669	7.68473e-223	4.82166e-221
NOS3	12.4637	3.2038	0.6999	4.57751	4.70545e-06	1.30471e-05
DNAJB4	284.358	3.19279	0.15472	20.6359	1.3066e-94	2.38419e-93
DUSP1	1946.7	3.18561	0.0651713	48.8806	0	0
TMEM81	149.856	3.18481	0.216109	14.7371	3.72702e-49	3.43782e-48
MYO1H	7.75165	3.17924	0.884553	3.59418	0.000325417	0.000780322
KLHL21	4637.96	3.17578	0.050255	63.1932	0	0
KPNA7	21.3315	3.17474	0.527689	6.01631	1.78442e-09	6.00084e-09
DAPP1	3.02777	3.17349	1.39177	2.28018	0.0225969	0.0420773
CXCL8	16.6796	3.17223	0.613079	5.17426	2.28811e-07	6.90762e-07
CDKN2D	282.396	3.1677	0.151436	20.9177	3.69164e-97	6.95249e-96
TULP2	15.02	3.16641	0.626232	5.05629	4.27501e-07	1.27e-06
CYGB	7.40194	3.16598	0.907021	3.49052	0.000482073	0.00113225
SLIT2	15.1398	3.16369	0.628101	5.0369	4.7312e-07	1.40109e-06
OSER1	7046.35	3.15937	0.0508745	62.1012	0	0
PIK3CD	90.2779	3.15837	0.255455	12.3637	4.10947e-35	2.87002e-34
SUN3	4.55595	3.14664	1.13798	2.7651	0.00569049	0.0117402
MAP1LC3B2	46.2426	3.14653	0.357457	8.80253	1.3376e-18	6.21917e-18
CARD6	52.3337	3.1426	0.340617	9.2262	2.80393e-20	1.37363e-19
ARRDC4	414.335	3.14171	0.126771	24.7826	1.38028e-135	3.90236e-134
SQSTM1	14410.2	3.14032	0.0387421	81.0571	0	0
SERPINE2	138.29	3.13959	0.207013	15.1662	5.92424e-52	5.72091e-51
AC068580.4	11.6722	3.111	0.703864	4.41989	9.87528e-06	2.6756e-05
GBP2	49.6302	3.10936	0.344645	9.02195	1.84779e-19	8.84361e-19
NNAT	225.82	3.10337	0.165239	18.7811	1.07732e-78	1.58997e-77
IER5	1712.38	3.10308	0.0800168	38.7803	0	0
TMEM236	53.7246	3.09735	0.339542	9.12213	7.36639e-20	3.56559e-19
IL15	5.71682	3.09431	1.00527	3.07808	0.00208341	0.00455164
AP002373.1	14.1922	3.08187	0.637275	4.83601	1.32472e-06	3.81328e-06
ALKAL2	4.43298	3.07977	1.17015	2.63194	0.00848979	0.0170932
GNG3	18.5672	3.07211	0.557626	5.50927	3.60322e-08	1.1357e-07
H1-4	8.46458	3.06673	0.84818	3.61566	0.000299588	0.000720742
NRG4	11.2904	3.06369	0.716847	4.27384	1.92133e-05	5.0979e-05
MMP3	8.46163	3.05851	0.818208	3.73806	0.000185443	0.000454003
RNF103-CHMP3	12.757	3.05435	0.687799	4.44076	8.9642e-06	2.43719e-05
PARD6G	55.2797	3.0538	0.32691	9.3414	9.50688e-21	4.72245e-20
GADD45A	2967.27	3.05299	0.0655274	46.591	0	0
RDH12	7.18276	3.05213	0.92086	3.31443	0.000918301	0.00209029
PNRC1	913.543	3.05073	0.0884342	34.4972	8.84746e-261	7.60493e-259
MX1	18.329	3.0462	0.560975	5.43018	5.62957e-08	1.7595e-07
RBM11	21.2917	3.04601	0.537884	5.66296	1.48784e-08	4.78991e-08
ZNF114	365.797	3.03597	0.129772	23.3947	4.84271e-121	1.18005e-119
H4C8	33.4067	3.03513	0.414894	7.31544	2.56536e-13	1.00835e-12
SELPLG	11.0851	3.03349	0.722995	4.19573	2.71997e-05	7.13626e-05
FAM83C	5.5015	3.03067	1.00529	3.01473	0.0025721	0.00555824
GPR75	204.661	3.02804	0.169879	17.8247	4.5442e-71	6.01433e-70
CXCR4	69.3168	3.01934	0.294919	10.2379	1.34167e-24	7.41138e-24
KIAA0319	57.8775	3.01504	0.313084	9.63014	5.96456e-22	3.07479e-21
C1S	421.369	3.00486	0.123301	24.37	3.55596e-131	9.68029e-130
NXF1	8498.33	3.00481	0.047594	63.1341	0	0
OVOL1	994.348	3.0004	0.081106	36.9936	1.45004e-299	1.5975e-297
MAPK10	6.76788	2.99242	0.911352	3.2835	0.00102527	0.00232275
KLRD1	4.12753	2.99192	1.18192	2.53141	0.0113604	0.0224265
EMP1	448.922	2.97751	0.119878	24.8377	3.50788e-136	9.97767e-135
PITX3	4.07434	2.969	1.24482	2.38509	0.0170752	0.0325946
CDKN2AIP	1365.15	2.96609	0.0712843	41.6093	0	0
BAAT	33.0935	2.95989	0.418131	7.07886	1.4535e-12	5.54509e-12
BARX2	10.5608	2.95813	0.740588	3.99429	6.48874e-05	0.000165361
AP3B2	5.25788	2.95745	1.03009	2.87105	0.0040911	0.00860539
H2BC12	611.989	2.95547	0.102547	28.8206	1.18287e-182	5.21751e-181
CCDC114	3.97967	2.94401	1.2337	2.38632	0.0170179	0.0324953
EGR2	18.3768	2.94398	0.550739	5.3455	9.01657e-08	2.78252e-07
CPO	3.92713	2.94291	1.18173	2.49033	0.0127624	0.0249818
DLX2	20.8381	2.94279	0.5178	5.68326	1.32151e-08	4.26437e-08
TNN	4.02559	2.94236	1.17632	2.50133	0.0123729	0.0242699
TRIM36	33.0687	2.93937	0.418197	7.02869	2.08487e-12	7.89855e-12
SNIP1	768.048	2.93447	0.0953465	30.7769	5.34213e-208	2.95657e-206
FAM219A	1327.19	2.93299	0.0708058	41.423	0	0
ANKRD65	9.05892	2.92466	0.781705	3.74138	0.000183013	0.000448333
MUC13	593.469	2.92361	0.108377	26.9763	2.80646e-160	1.0163e-158
H4C12	3.9081	2.9187	1.21067	2.41081	0.0159172	0.0305482
ZNF823	1451.7	2.91661	0.0718411	40.598	0	0
CAMK4	27.2902	2.91593	0.447835	6.51117	7.45653e-11	2.66365e-10
RHEBL1	143.098	2.91338	0.201001	14.4943	1.3157e-47	1.17886e-46
THSD4	16.9369	2.90543	0.578467	5.02263	5.09683e-07	1.50632e-06
PHLDA2	1011.01	2.90539	0.0911829	31.8634	8.59839e-223	5.38053e-221
PRDM7	26.865	2.90376	0.460516	6.30546	2.87342e-10	1.00249e-09
DNAI1	5.25159	2.90295	1.0388	2.79452	0.00519767	0.0107927
ALDOA	1179.14	2.89711	0.0780319	37.1273	1.0198e-301	1.145e-299
GCNT7	43.6249	2.8962	0.359183	8.06329	7.42686e-16	3.17563e-15
STOX2	42.7843	2.89478	0.37655	7.68764	1.49874e-14	6.13671e-14
HELB	166.216	2.89331	0.182935	15.816	2.41341e-56	2.51702e-55
RASGRP3	575.417	2.87882	0.10151	28.36	6.30184e-177	2.65492e-175
PEAK3	5.1058	2.87836	1.03136	2.79085	0.00525696	0.0109062
PLET1	3.87094	2.87781	1.21584	2.36694	0.0179358	0.034085
MYH15	30.2978	2.87643	0.422258	6.81202	9.62396e-12	3.55647e-11
SARNP	7.57754	2.87578	0.860714	3.34116	0.000834305	0.00190817
TSPYL2	3165.7	2.87311	0.0623783	46.0594	0	0
SENP3-EIF4A1	13.6354	2.8726	0.639669	4.49076	7.09688e-06	1.94483e-05
ZNF222	216.279	2.86865	0.161014	17.8161	5.29694e-71	6.99876e-70
FGF19	16.6688	2.86738	0.595611	4.81418	1.47809e-06	4.24227e-06
DCAF4L1	22.5551	2.86308	0.51436	5.5663	2.60209e-08	8.26148e-08
KIAA1324	21.4579	2.8629	0.517509	5.53207	3.16467e-08	1.00084e-07
ERRFI1	2777.83	2.86215	0.0580732	49.2852	0	0
ZFAND5	1926.37	2.86183	0.0641808	44.5902	0	0
CWC25	2349.03	2.86037	0.063454	45.0778	0	0
FAM214A	320.364	2.84962	0.135621	21.0117	5.12957e-98	9.77826e-97
AC010422.8	53.6796	2.84932	0.318343	8.95048	3.5395e-19	1.67523e-18
ADGRF2	324.471	2.84745	0.13481	21.122	4.99429e-99	9.59837e-98
CLDN4	13066.1	2.84647	0.0389771	73.0294	0	0
SASH3	3.71598	2.84638	1.20482	2.36249	0.0181525	0.0344661
S100P	190.25	2.84475	0.170987	16.6372	3.74704e-62	4.33143e-61
DDX43	4.93587	2.84339	1.04518	2.72049	0.00651854	0.0133535
HSPB9	3.71124	2.8424	1.23374	2.30388	0.0212292	0.0397419
GPBAR1	7.45671	2.83897	0.848818	3.34461	0.000823978	0.00188565
PLAUR	151.616	2.83566	0.194138	14.6065	2.5544e-48	2.31524e-47
CLIP4	95.0106	2.8297	0.248314	11.3957	4.39535e-30	2.75117e-29
TCAP	20.7074	2.82443	0.510297	5.53488	3.11449e-08	9.85634e-08
SERPINB8	101.446	2.82385	0.230834	12.2333	2.06502e-34	1.42439e-33
GDF15	1020.33	2.82192	0.079366	35.5557	6.77727e-277	6.41272e-275
IFITM10	9.8817	2.8165	0.739778	3.80722	0.000140538	0.000348023
ADAM32	7.21275	2.81222	0.861341	3.26493	0.00109489	0.0024745
SERTAD1	853.72	2.81133	0.0843208	33.3409	9.86852e-244	7.42227e-242
ZMAT5	327.845	2.80863	0.13229	21.2309	4.952e-100	9.59567e-99
BRD2	14401.1	2.80776	0.052694	53.2843	0	0
GPR179	6.07218	2.80175	0.96862	2.89252	0.00382169	0.00806836
PTAFR	17.0349	2.80073	0.55932	5.00738	5.51749e-07	1.62778e-06
HBEGF	908.132	2.80001	0.0862136	32.4776	2.21259e-231	1.50059e-229
ELMO1	3.52996	2.79756	1.25727	2.22512	0.0260735	0.0479762
GOLGB1	9718.42	2.78664	0.047407	58.7813	0	0
ANGPTL4	5.88073	2.77961	0.94054	2.95534	0.00312328	0.00667738
SGK1	2924	2.77857	0.0625643	44.4115	0	0
PLCXD2	514.394	2.77841	0.110614	25.1181	3.15207e-139	9.26897e-138
ZFYVE1	676.595	2.7777	0.0959459	28.9507	2.75112e-184	1.23202e-182
PELO	2798.04	2.77532	0.0526282	52.7346	0	0
TCHH	74.1293	2.77507	0.272699	10.1763	2.52926e-24	1.38672e-23
FHL1	4.68033	2.76031	1.0593	2.60579	0.00916635	0.0183656
RNF122	71.831	2.75759	0.27209	10.1348	3.87055e-24	2.11077e-23
MCC	65.165	2.75551	0.312355	8.82174	1.12696e-18	5.24916e-18
CCDC17	44.3	2.7497	0.343409	8.00707	1.1747e-15	4.98745e-15
KLF9	21.0012	2.74854	0.514113	5.34617	8.98331e-08	2.77262e-07
AC092718.3	27.9909	2.7474	0.439126	6.25653	3.93648e-10	1.36345e-09
NR1D1	235.631	2.74716	0.153877	17.8529	2.74172e-71	3.64105e-70
H2BC7	9.41697	2.74577	0.777253	3.53266	0.000411401	0.000974455
SESN2	908.555	2.74176	0.081487	33.6466	3.50161e-248	2.74812e-246
AKT1S1	4727.81	2.74063	0.0498571	54.9697	0	0
ZNF483	13.8457	2.73871	0.608986	4.49717	6.88642e-06	1.88847e-05
HIVEP2	101.931	2.73717	0.236661	11.5658	6.14124e-31	3.91924e-30
TBC1D15	1849.21	2.73658	0.0667466	40.9996	0	0
TEC	139.169	2.73464	0.197258	13.8632	1.05831e-43	8.79086e-43
AK8	14.9509	2.72439	0.586351	4.64635	3.37861e-06	9.47788e-06
MT2A	95.5256	2.72212	0.236626	11.5039	1.2609e-30	7.98601e-30
GNRH1	101.645	2.71687	0.230378	11.7931	4.23751e-32	2.77991e-31
H3C6	98.625	2.71501	0.228678	11.8727	1.64167e-32	1.0867e-31
PLCXD3	11.5644	2.71176	0.675454	4.01473	5.9515e-05	0.000152199
C1orf162	18.215	2.70847	0.557726	4.85626	1.19621e-06	3.45354e-06
CRTC2	1311.71	2.70642	0.0708999	38.1725	0	0
SMAD7	398.078	2.70522	0.122965	22	2.88176e-107	6.18696e-106
TOB1	3144.54	2.70445	0.053225	50.8116	0	0
TAF13	754.392	2.70087	0.0908421	29.7315	3.01033e-194	1.48404e-192
ZNF57	56.5909	2.70027	0.300421	8.98829	2.51096e-19	1.19517e-18
RB1CC1	1945.67	2.6985	0.0702092	38.4352	0	0
KLF4	241.335	2.6973	0.147746	18.2563	1.84301e-74	2.55151e-73
MAPRE2	728.745	2.68715	0.0893247	30.083	8.08853e-199	4.13519e-197
CCDC126	403.193	2.68262	0.118811	22.579	6.9703e-113	1.57123e-111
TEX14	11.2166	2.67717	0.66996	3.99602	6.44166e-05	0.000164269
TSC22D3	28.1333	2.67564	0.434168	6.16269	7.1521e-10	2.44616e-09
GJA3	4.48451	2.67518	1.05557	2.53436	0.0112653	0.0222597
HSPH1	23530.6	2.66563	0.047728	55.8504	0	0
TRIM16L	179.622	2.66382	0.185178	14.3852	6.40867e-47	5.67066e-46
LAT	5.5581	2.66336	1.00444	2.65159	0.00801127	0.0162063
PANX2	63.0426	2.66182	0.287526	9.25767	2.08942e-20	1.02746e-19
MAOA	35.5438	2.6605	0.383834	6.93139	4.16731e-12	1.5614e-11
SELENOK	2662.86	2.659	0.0520162	51.1186	0	0
PER1	339.406	2.65678	0.130426	20.37	3.08774e-92	5.43563e-91
KCP	12.1376	2.65176	0.673923	3.93481	8.32622e-05	0.000210067
PRH2	4.60427	2.65149	1.1347	2.33672	0.0194538	0.0366787
AOC3	47.0657	2.64724	0.32917	8.04218	8.82519e-16	3.76326e-15
RGS2	637.316	2.64606	0.115405	22.9286	2.41039e-116	5.58915e-115
H2AC6	178.746	2.64406	0.175537	15.0627	2.84865e-51	2.71623e-50
GABARAP	20.8361	2.64392	0.491444	5.37991	7.45243e-08	2.31168e-07
CACNA2D2	17.5212	2.64357	0.547808	4.82572	1.39496e-06	4.01105e-06
CD109	25.1801	2.64132	0.444896	5.93692	2.90421e-09	9.6873e-09
LAMB3	10173.1	2.632	0.0418626	62.8723	0	0
RNF103	516.265	2.62244	0.108628	24.1415	9.15982e-129	2.42875e-127
CPEB4	1418.28	2.61884	0.0744936	35.1552	9.67947e-271	8.80382e-269
H4C9	439.007	2.61755	0.124627	21.0031	6.14181e-98	1.16889e-96
WBP2	2283.67	2.6143	0.0561118	46.5909	0	0
WFIKKN1	17.2078	2.61363	0.537771	4.86011	1.1732e-06	3.38961e-06
ROM1	27.9709	2.60683	0.458851	5.68121	1.33742e-08	4.31393e-08
BACH2	5.36981	2.60651	0.960764	2.71295	0.00666865	0.0136459
KRT13	9.59859	2.60324	0.723592	3.59767	0.000321085	0.000770171
UFD1	5285.72	2.60157	0.0477491	54.4842	0	0
BCL2L15	8.45513	2.60138	0.781566	3.32843	0.000873383	0.00199269
ULK1	1063.56	2.60077	0.077824	33.4186	7.35759e-245	5.60562e-243
PDCL	1306.43	2.59837	0.0720671	36.0549	1.15656e-284	1.14999e-282
SLC38A2	15610.7	2.59754	0.100777	25.775	1.68954e-146	5.3217e-145
TTLL7	5.48555	2.59277	0.990396	2.61791	0.00884704	0.0177668
TAX1BP1	10254.4	2.58494	0.0420516	61.4708	0	0
RPA4	11.4996	2.58152	0.679659	3.79826	0.000145714	0.000360345
HSPA13	1541.16	2.5803	0.0650776	39.6496	0	0
SLC26A5	8.57475	2.57732	0.79537	3.24041	0.00119359	0.00268644
MOK	85.4421	2.57536	0.255548	10.0778	6.92644e-24	3.75458e-23
LIN37	78.02	2.57486	0.25323	10.168	2.75414e-24	1.50825e-23
OGA	6858.89	2.5744	0.0449853	57.2276	0	0
AOX1	28.537	2.57318	0.426653	6.03109	1.6286e-09	5.4846e-09
NXPE3	352.131	2.57109	0.122635	20.9654	1.357e-97	2.57425e-96
CDK11A	131.52	2.56934	0.194944	13.1799	1.1452e-39	8.80226e-39
LRP11	62.7246	2.56771	0.285088	9.00672	2.12315e-19	1.01346e-18
GPATCH3	1023.67	2.56745	0.0852832	30.105	4.16954e-199	2.14097e-197
ECM1	125.043	2.56547	0.206748	12.4087	2.34399e-35	1.64782e-34
ULBP2	369.052	2.56319	0.120258	21.3141	8.39757e-101	1.64901e-99
H2BC9	163.352	2.55452	0.179256	14.2507	4.439e-46	3.85941e-45
SULT1A2	11.2872	2.55168	0.679389	3.75584	0.000172758	0.000424363
NFATC4	4.09326	2.55058	1.09668	2.32572	0.0200333	0.0377015
SDCBP	5185.43	2.54893	0.0546941	46.6033	0	0
UTS2B	5.19829	2.54418	0.971499	2.61881	0.00882359	0.0177242
FBRS	2108.9	2.54271	0.0673214	37.7697	0	0
NRDE2	864.946	2.54228	0.0879138	28.9178	7.12603e-184	3.17908e-182
IL15RA	17.5518	2.54211	0.524635	4.84547	1.2631e-06	3.64127e-06
BSCL2	67.1293	2.54209	0.284805	8.92572	4.42794e-19	2.09025e-18
MXD4	539.266	2.54015	0.100706	25.2235	2.21435e-140	6.6278e-139
CLK3	2662.52	2.53527	0.0569572	44.5118	0	0
CITED2	2637.39	2.5345	0.0566245	44.7598	0	0
TES	7830.89	2.53343	0.0443599	57.1107	0	0
BRF2	407.527	2.52744	0.113416	22.2848	5.19174e-110	1.14072e-108
RPL3L	15.5616	2.52434	0.587028	4.3002	1.70646e-05	4.54682e-05
AOC2	136.526	2.52255	0.196163	12.8595	7.61021e-38	5.62461e-37
ZNF668	218.769	2.52243	0.153133	16.4722	5.814e-61	6.60045e-60
IGHMBP2	2923.15	2.51923	0.0523548	48.1184	0	0
HSPA8	235151	2.51768	0.0448899	56.0858	0	0
EXPH5	482.976	2.51666	0.11208	22.4542	1.16507e-111	2.60129e-110
ANKRD37	51.8514	2.51235	0.310248	8.09788	5.59257e-16	2.3983e-15
SERPINI1	121.49	2.50983	0.210716	11.911	1.03785e-32	6.90311e-32
FCGBP	6.07359	2.5085	0.940333	2.66768	0.00763774	0.015496
MUC4	7.97578	2.50471	0.813667	3.0783	0.00208189	0.00454917
ELL	700.19	2.50408	0.090715	27.6038	1.00207e-167	3.89962e-166
HPD	22.1684	2.50404	0.473347	5.29007	1.2227e-07	3.74716e-07
AP5Z1	2708.65	2.4977	0.0507674	49.199	0	0
DUSP5	1948.62	2.49518	0.0584754	42.6706	0	0
CSRNP1	1166.13	2.49509	0.0769163	32.439	7.73837e-231	5.2331e-229
ATG9B	55.6771	2.49335	0.307849	8.09927	5.52879e-16	2.37139e-15
GPER1	5.9885	2.49136	0.897225	2.77674	0.00549071	0.011359
DRP2	12.057	2.48993	0.667448	3.73053	0.00019108	0.000467071
WBP1	112.123	2.489	0.222533	11.1849	4.83492e-29	2.95459e-28
TRMT10A	243.935	2.48833	0.152068	16.3633	3.4978e-60	3.91227e-59
BNIP5	75.3078	2.48816	0.263555	9.44076	3.70083e-21	1.864e-20
TUBA4A	1814.92	2.48705	0.0601141	41.3721	0	0
LRIT3	7.00742	2.48673	0.826096	3.01021	0.00261063	0.00563423
ATG4A	590.869	2.48369	0.0978997	25.3697	5.44275e-142	1.64587e-140
LRRC4	5.86391	2.4806	0.920725	2.69418	0.00705627	0.0143847
MMRN2	6.95871	2.48051	0.832765	2.97864	0.00289528	0.00621485
TOR1AIP2	3216.83	2.47847	0.0539749	45.9189	0	0
RUNX1	439.183	2.46986	0.115335	21.4146	9.7778e-102	1.94941e-100
SPTY2D1	2847.06	2.46897	0.0547322	45.11	0	0
ZCCHC12	18.8308	2.46767	0.516857	4.77437	1.80275e-06	5.14514e-06
AL135905.2	269.205	2.46492	0.151891	16.2283	3.18307e-59	3.49691e-58
KBTBD4	308.563	2.46188	0.134384	18.3198	5.7574e-75	8.02752e-74
ERICH5	13.5511	2.46084	0.612085	4.02042	5.80946e-05	0.000148745
MBNL2	983.878	2.46059	0.0822833	29.9039	1.7525e-196	8.76847e-195
FAM229A	35.2869	2.45962	0.383827	6.40815	1.47293e-10	5.19444e-10
PDE2A	11.7315	2.45778	0.643455	3.81966	0.000133634	0.000331485
ERVFRD-1	6.97736	2.45749	0.845466	2.90667	0.00365295	0.00774206
TRAF3IP3	12.8028	2.45474	0.632511	3.88094	0.000104054	0.000260257
GSTO2	9.79075	2.45407	0.695864	3.52665	0.000420857	0.000996149
PEX11A	256.65	2.45299	0.139745	17.5534	5.6052e-69	7.20527e-68
NOCT	636.295	2.45285	0.100537	24.3974	1.82152e-131	4.97599e-130
SNX32	32.3587	2.45211	0.387932	6.32096	2.59937e-10	9.08368e-10
PLOD2	2656.11	2.45208	0.056519	43.385	0	0
CHRM4	9.88022	2.45083	0.713057	3.43708	0.00058802	0.00136768
WDR47	399.879	2.45023	0.125539	19.5178	7.75683e-85	1.24502e-83
H2BC11	65.6327	2.44701	0.284089	8.61354	7.08378e-18	3.2196e-17
ATF3	1240.27	2.44663	0.0721474	33.9116	4.50083e-252	3.65455e-250
P4HA1	3197.88	2.4449	0.0480511	50.8811	0	0
ZNF473	1974.43	2.44468	0.0622472	39.2737	0	0
ZNF143	1115.72	2.44189	0.0787341	31.0144	3.44302e-211	1.94684e-209
AKR1B10	61.3793	2.44115	0.282342	8.64606	5.33082e-18	2.43799e-17
CDH23	13.5437	2.43908	0.621179	3.92654	8.61775e-05	0.000217212
AC007906.2	3.93512	2.43434	1.09898	2.21508	0.0267545	0.0491331
LINC00672	17.6388	2.43329	0.576743	4.21901	2.45372e-05	6.45722e-05
DHRS2	469.13	2.43266	0.114029	21.3337	5.52795e-101	1.08916e-99
DUSP13	23.3416	2.43118	0.454629	5.3476	8.91269e-08	2.75227e-07
RNF183	113.167	2.4265	0.207059	11.7189	1.01995e-31	6.62627e-31
TMEM262	10.484	2.42521	0.676115	3.58697	0.000334542	0.00080122
ZNF540	10.6141	2.42515	0.673689	3.5998	0.000318458	0.000764416
ERMN	14.4028	2.42432	0.572705	4.23311	2.3048e-05	6.0769e-05
CCR3	39.5936	2.41813	0.346888	6.97093	3.14859e-12	1.18424e-11
BACH1	1756.37	2.4177	0.0652256	37.0668	9.64304e-301	1.07243e-298
CCDC116	5.69233	2.41202	0.905629	2.66337	0.00773621	0.0156823
GPX2	1541.34	2.40907	0.0642698	37.4838	1.69148e-307	1.95528e-305
CSRP2	469.534	2.40504	0.109055	22.0534	8.86242e-108	1.91673e-106
SLC2A12	10.5584	2.40478	0.668061	3.59963	0.000318668	0.000764844
CYTH1	1879.87	2.40301	0.0613077	39.1958	0	0
CRYBA2	8.44616	2.40273	0.777267	3.09125	0.00199317	0.00436588
PTP4A1	12.4275	2.40108	0.625567	3.83825	0.000123916	0.00030826
AC068946.2	20.9132	2.40103	0.485387	4.94663	7.55075e-07	2.2082e-06
KBTBD8	381.346	2.39873	0.123006	19.5009	1.07793e-84	1.72896e-83
H3-5	19.1113	2.39867	0.502506	4.77341	1.81135e-06	5.16655e-06
BMT2	166.549	2.39697	0.180453	13.2831	2.90212e-40	2.25277e-39
IL10RA	29.2781	2.3885	0.405979	5.88331	4.0215e-09	1.3312e-08
PDK1	598.032	2.38633	0.0978415	24.3898	2.19629e-131	5.9928e-130
PARD6B	1693.25	2.38425	0.0654279	36.4409	9.58038e-291	9.94749e-289
H2BC6	9.39188	2.38419	0.71396	3.33938	0.000839646	0.00191982
MED15	4073.96	2.38247	0.0454551	52.4137	0	0
TVP23A	34.1568	2.38168	0.379999	6.2676	3.66652e-10	1.27126e-09
UBAP1	2639.18	2.3783	0.057207	41.5736	0	0
EHF	26.2972	2.37753	0.426708	5.57179	2.52139e-08	8.01719e-08
ODAPH	16.1299	2.37408	0.569253	4.17051	3.0392e-05	7.94982e-05
LONRF3	26.3805	2.37365	0.427176	5.55661	2.75062e-08	8.72599e-08
KCNJ13	14.1522	2.37342	0.583495	4.0676	4.74994e-05	0.000122445
SOD1	10744.1	2.37293	0.042672	55.6087	0	0
VCP	30861.8	2.37169	0.0390084	60.7994	0	0
ZBTB43	1081.23	2.36847	0.0795166	29.7858	5.96619e-195	2.96615e-193
BCL6	990.024	2.36759	0.0789358	29.9938	1.18052e-197	5.99611e-196
OSR2	122.483	2.36457	0.202353	11.6854	1.51333e-31	9.79369e-31
UGT2B4	8.22608	2.35963	0.772849	3.05317	0.00226441	0.00492326
MEF2D	909.498	2.35382	0.0790429	29.779	7.29869e-195	3.62095e-193
BOD1L1	5010.2	2.35376	0.0461193	51.0363	0	0
ATG14	1198.75	2.35048	0.075006	31.3372	1.45435e-215	8.57482e-214
PSMC4	11226.4	2.34907	0.0431422	54.4496	0	0
TRIML2	30.3837	2.34859	0.39848	5.89386	3.77276e-09	1.25027e-08
ZNF442	73.8703	2.34598	0.252598	9.28739	1.58112e-20	7.79795e-20
MED26	302.263	2.34579	0.1292	18.1564	1.14364e-73	1.56757e-72
TENT5B	1272.61	2.34542	0.0703707	33.3295	1.44381e-243	1.08244e-241
PFKFB3	2559.86	2.34471	0.055091	42.5607	0	0
RLF	1783.46	2.34034	0.0644863	36.292	2.16416e-288	2.21765e-286
MTMR11	100.458	2.3403	0.230483	10.1539	3.18319e-24	1.73875e-23
MARF1	834.122	2.3371	0.0832141	28.0854	1.47809e-173	6.08507e-172
AC013394.1	11.8783	2.33691	0.644469	3.62611	0.000287727	0.00069299
ABTB2	766.994	2.33533	0.0886984	26.3289	8.94743e-153	3.00372e-151
TSPAN9	2435.09	2.33506	0.058838	39.6862	0	0
MATN4	5.48444	2.33442	0.921112	2.53435	0.0112655	0.0222597
KDM6B	686.938	2.33213	0.0884293	26.3728	2.81387e-153	9.4735e-152
ETV3	1449.6	2.32676	0.0687202	33.8584	2.7279e-251	2.19975e-249
MPZL3	1950.97	2.32592	0.0600737	38.7177	0	0
CD163	6.27665	2.31868	0.858227	2.70171	0.00689833	0.0140897
CACNB4	6.36071	2.31626	0.855675	2.70694	0.00679069	0.0138807
ATP6V1FNB	21.7505	2.31614	0.464776	4.98334	6.24952e-07	1.83727e-06
PROCR	154.457	2.31415	0.187075	12.3702	3.79034e-35	2.64872e-34
MACO1	1276.96	2.30966	0.0710991	32.4851	1.73326e-231	1.17892e-229
CAPS2	4.6258	2.30813	1.03377	2.23272	0.0255672	0.0471028
MTF1	797.488	2.30747	0.0885181	26.0678	8.45084e-150	2.75045e-148
TAS2R5	19.6815	2.30568	0.502545	4.588	4.47504e-06	1.24333e-05
RFFL	903.637	2.30529	0.0814838	28.2914	4.41193e-176	1.85206e-174
EGF	19.7233	2.305	0.493003	4.67544	2.93323e-06	8.268e-06
KIF5A	12.7365	2.30164	0.630046	3.65313	0.000259067	0.000626729
TSC22D2	1208.84	2.30062	0.0862814	26.6642	1.22606e-156	4.26866e-155
TM2D2	2228.09	2.29996	0.0578766	39.739	0	0
CASTOR2	950.665	2.29905	0.0761964	30.1727	5.40857e-200	2.80791e-198
CLCF1	286.163	2.29841	0.131498	17.4787	2.08325e-68	2.65826e-67
MED31	135.716	2.29712	0.188599	12.1799	3.97641e-34	2.72918e-33
ZNF430	444.826	2.29499	0.110848	20.704	3.18636e-95	5.85522e-94
CASS4	11.4596	2.29445	0.650664	3.52632	0.000421385	0.000997298
ZC3H12A	471.056	2.29028	0.106003	21.6058	1.58419e-103	3.22137e-102
SLC20A1	8365.08	2.29022	0.0490175	46.7225	0	0
IP6K2	2802.88	2.28878	0.0570102	40.1469	0	0
AKR1C3	901.433	2.2865	0.0895658	25.5287	9.46544e-144	2.90348e-142
PSMD2	20125.7	2.28578	0.0362453	63.064	0	0
PLAAT2	34.5882	2.28284	0.369038	6.18592	6.17402e-10	2.11812e-09
BHLHE40	438.644	2.28154	0.112436	20.2919	1.51621e-91	2.6453e-90
PLEKHO2	353.074	2.28123	0.118126	19.3119	4.26888e-83	6.69609e-82
GBE1	538.432	2.27674	0.0971541	23.4344	1.90848e-121	4.67966e-120
FBXO30	2464.15	2.27477	0.065581	34.6863	1.26619e-263	1.10046e-261
DCUN1D3	807.412	2.27451	0.0823066	27.6346	4.27576e-168	1.67225e-166
IKZF5	641.977	2.27197	0.0909047	24.9929	7.30753e-138	2.12489e-136
ZNF438	14.9066	2.26794	0.55553	4.08248	4.45584e-05	0.000115104
IL6R	451.204	2.26699	0.10615	21.3565	3.39644e-101	6.72014e-100
C2orf42	292.57	2.26622	0.134923	16.7964	2.59141e-63	3.05118e-62
B4GALNT1	177.484	2.26577	0.171429	13.217	7.00383e-40	5.39743e-39
C7orf25	14.8358	2.26568	0.563769	4.01881	5.8494e-05	0.000149735
IL11	29.903	2.26408	0.416542	5.43542	5.46669e-08	1.70951e-07
RRAD	36.8189	2.25882	0.350953	6.43624	1.22473e-10	4.33215e-10
USP43	387.295	2.25731	0.116034	19.4539	2.70201e-84	4.30743e-83
ZNF136	135.384	2.25665	0.194074	11.6278	2.977e-31	1.91288e-30
DNAJB9	718.979	2.25506	0.0939062	24.014	1.98691e-127	5.19208e-126
AC011448.1	21.6968	2.25495	0.458646	4.91653	8.80918e-07	2.56249e-06
APOL2	410.991	2.25461	0.113107	19.9335	2.08552e-88	3.53604e-87
RNF19B	845.473	2.25254	0.0818918	27.5063	1.47605e-166	5.64119e-165
NME9	9.56307	2.24343	0.694684	3.22942	0.0012404	0.00278618
RRAGC	282.086	2.24247	0.141354	15.8642	1.12116e-56	1.17872e-55
DNALI1	6.92496	2.23816	0.80158	2.79218	0.0052354	0.0108643
LDLR	7303.74	2.23536	0.0427222	52.3232	0	0
RAB4B	14.5243	2.23495	0.562364	3.9742	7.06176e-05	0.000179302
AP001931.2	8.75994	2.23157	0.723979	3.08237	0.00205361	0.00449031
HSP90AA1	102243	2.22854	0.038904	57.2831	0	0
NFKBIZ	738.7	2.2225	0.0843735	26.3413	6.46284e-153	2.17274e-151
MICALL2	442.739	2.22033	0.108665	20.4328	8.54063e-93	1.51944e-91
PTPN23	2348.83	2.21634	0.0533572	41.5377	0	0
ADRM1	10479.9	2.21485	0.0398455	55.5861	0	0
DDX47	159.012	2.21363	0.1794	12.3391	5.5789e-35	3.88701e-34
CASP4	1133.72	2.21323	0.0739635	29.9233	9.78845e-197	4.90803e-195
KRT15	245.946	2.21215	0.148489	14.8977	3.41173e-50	3.20366e-49
UBXN8	596.983	2.20762	0.0975985	22.6194	2.79115e-113	6.31602e-112
TTC1	3398.99	2.20433	0.0488412	45.1326	0	0
UBQLN1	4363.95	2.20391	0.0535291	41.1722	0	0
ZNF329	286.509	2.20377	0.129711	16.9898	9.77072e-65	1.17459e-63
CLDN15	291.625	2.1992	0.13368	16.4512	8.22791e-61	9.31835e-60
SLC25A18	35.3633	2.19823	0.361545	6.08009	1.20116e-09	4.06611e-09
RTCA	1501.97	2.19803	0.062902	34.9437	1.616e-267	1.42561e-265
SIRT6	474.101	2.19599	0.105701	20.7754	7.22042e-96	1.33518e-94
OVGP1	37.7885	2.19263	0.351155	6.24404	4.26406e-10	1.47538e-09
FAM184B	5.12927	2.19167	0.957912	2.28796	0.0221397	0.0412849
PHTF1	719.855	2.18789	0.0852511	25.6641	2.94406e-145	9.18688e-144
INSIG1	5651.06	2.18656	0.0582497	37.5377	0	0
NR4A3	5.92416	2.18533	0.916839	2.38355	0.0171465	0.0327041
DNAJB6	4030.65	2.18517	0.048154	45.3788	0	0
SPDYA	16.9862	2.18448	0.522597	4.18004	2.91453e-05	7.63137e-05
KAT6B	1115.62	2.1841	0.0751431	29.0659	9.70254e-186	4.40387e-184
EPG5	754.169	2.17931	0.0829732	26.2652	4.78977e-152	1.59654e-150
ZIC2	37.5023	2.17528	0.348635	6.23942	4.39208e-10	1.51878e-09
STAT4	20.6463	2.16853	0.471651	4.59773	4.27109e-06	1.18779e-05
INO80	2578.52	2.16728	0.0533504	40.6235	0	0
RGMA	154.43	2.16601	0.182052	11.8977	1.21589e-32	8.06449e-32
PRDM10	818.065	2.16515	0.085841	25.2228	2.25116e-140	6.7294e-139
DAGLB	1436.55	2.16399	0.0753193	28.7308	1.57198e-181	6.86927e-180
PELI2	78.1632	2.1612	0.242242	8.92165	4.59397e-19	2.16775e-18
ALDOC	924.117	2.16094	0.0775927	27.8498	1.08364e-170	4.3246e-169
ALOX12	18.0928	2.1584	0.502808	4.29269	1.76521e-05	4.69801e-05
H3C10	34.0325	2.15821	0.361349	5.97264	2.33442e-09	7.81449e-09
HSPA5	39587	2.15797	0.0487612	44.2559	0	0
GSR	4819.04	2.15322	0.0463648	46.4409	0	0
TNFRSF10D	1341.95	2.15078	0.0722705	29.7602	1.28052e-194	6.33938e-193
ZBTB17	628.105	2.14774	0.0913273	23.517	2.73445e-122	6.74729e-121
ARL8A	616.841	2.14357	0.0913443	23.467	8.87309e-122	2.18256e-120
CNNM2	586.602	2.14349	0.0931507	23.011	3.61361e-117	8.46277e-116
EPHX4	17.2222	2.13988	0.520469	4.11144	3.932e-05	0.000101954
CYP19A1	10.3687	2.13981	0.688699	3.10704	0.00188973	0.00415404
CLTRN	18.9849	2.13973	0.487943	4.38521	1.15876e-05	3.12906e-05
RNF39	38.8927	2.13921	0.371858	5.75277	8.77954e-09	2.85743e-08
RASSF5	27.0422	2.13916	0.438577	4.87751	1.07434e-06	3.11087e-06
TMEM59	2506.95	2.13599	0.057773	36.9721	3.22139e-299	3.53239e-297
SYNJ1	641.911	2.13465	0.093288	22.8824	6.96213e-116	1.60801e-114
PFKFB4	469.168	2.13247	0.104798	20.3484	4.79995e-92	8.43713e-91
ARID3B	1726.95	2.13153	0.0621683	34.2865	1.24662e-257	1.04104e-255
ITPKC	1581.07	2.12991	0.0662624	32.1436	1.08579e-226	7.01906e-225
RPP21	74.9712	2.12974	0.258231	8.2474	1.61879e-16	7.04237e-16
NPC1	2576.88	2.12962	0.0520131	40.9439	0	0
TTC9B	5.67665	2.12919	0.872735	2.43967	0.0147006	0.0284413
HAUS8	923.536	2.12877	0.076479	27.8347	1.64939e-170	6.57125e-169
BHLHE41	12.3131	2.12829	0.607092	3.50572	0.000455379	0.00107321
SIRT7	1857.17	2.12795	0.0635511	33.484	8.23693e-246	6.31659e-244
RUSC2	771.267	2.12774	0.0850853	25.0072	5.10599e-138	1.49026e-136
ZACN	19.4664	2.12727	0.480997	4.42262	9.75097e-06	2.64344e-05
AIFM2	2553.69	2.12623	0.0530008	40.117	0	0
JMY	393.973	2.12618	0.111044	19.1472	1.02052e-81	1.57033e-80
NPR3	7.2852	2.12551	0.831389	2.55658	0.0105708	0.0209824
RFESD	57.9304	2.1224	0.286415	7.41021	1.26099e-13	5.01364e-13
MED17	398.093	2.11892	0.117058	18.1014	3.105e-73	4.23124e-72
TINAGL1	3053.36	2.11537	0.0486249	43.5039	0	0
NQO1	7061.19	2.11485	0.0449613	47.0371	0	0
RSRC2	4997.47	2.11437	0.0539285	39.2068	0	0
WHAMM	450.508	2.11398	0.1082	19.5378	5.23976e-85	8.4506e-84
SERINC1	5224.73	2.11396	0.0514147	41.1158	0	0
SLC30A1	1412.77	2.11349	0.0688125	30.7137	3.73017e-207	2.04514e-205
TBC1D17	1382.39	2.11296	0.0723449	29.2068	1.59164e-187	7.32343e-186
SDE2	1183.33	2.11232	0.0701534	30.11	3.58776e-199	1.84628e-197
RAB5IF	1868.78	2.1118	0.0750065	28.1548	2.09259e-174	8.67576e-173
BPGM	307.239	2.10961	0.128384	16.432	1.1283e-60	1.27353e-59
SLC4A4	16.121	2.10911	0.530363	3.97673	6.98693e-05	0.000177518
PTRH2	1162.82	2.10636	0.0682633	30.8563	4.60734e-209	2.58033e-207
MKRN1	1893.13	2.1053	0.0580349	36.2765	3.80388e-288	3.88095e-286
LNX1	219.745	2.10395	0.146263	14.3847	6.4536e-47	5.70826e-46
HSPB8	2152.58	2.10233	0.0551582	38.1146	0	0
ZNF408	862.004	2.1021	0.0769705	27.3105	3.18541e-164	1.19407e-162
ABHD17B	212.327	2.10174	0.154141	13.6351	2.47569e-42	2.00672e-41
ADGRD1	20.793	2.0995	0.469768	4.46922	7.85044e-06	2.14332e-05
SLU7	2979.05	2.09519	0.0559907	37.4204	1.82052e-306	2.08391e-304
KLF5	4279.63	2.09474	0.0497137	42.1361	0	0
IFIT2	21.0882	2.09252	0.475041	4.40491	1.05827e-05	2.86396e-05
PIM1	1761.81	2.09084	0.058831	35.5397	1.19779e-276	1.12881e-274
ZBTB49	170.679	2.08914	0.166605	12.5394	4.54287e-36	3.24712e-35
ZBTB5	1059.29	2.0885	0.0740053	28.221	3.23015e-175	1.35113e-173
PSMD14	7058.72	2.08807	0.0419779	49.7422	0	0
HECW1	21.3281	2.08733	0.456277	4.5747	4.76907e-06	1.32142e-05
KCTD9	1640.44	2.08679	0.0669713	31.1595	3.76899e-213	2.1784e-211
RBM15	802.511	2.08557	0.0806216	25.8686	1.50339e-147	4.79327e-146
ZNF394	855.48	2.08543	0.0806326	25.8633	1.72395e-147	5.48159e-146
UBC	27709.9	2.08435	0.0403456	51.6622	0	0
EXOC8	898.927	2.08414	0.0772948	26.9635	3.96679e-160	1.43428e-158
IFI27	15.1499	2.08391	0.56133	3.71246	0.000205255	0.000500624
HLA-E	3308.14	2.08304	0.0495673	42.0244	0	0
ZBTB40	2689.48	2.08129	0.0509861	40.8208	0	0
CCDC186	1892.31	2.08024	0.0737731	28.1978	6.23098e-175	2.59709e-173
MORC3	1353.71	2.07861	0.0680562	30.5426	7.1005e-205	3.82157e-203
RMND5A	3049.08	2.07733	0.0545894	38.0537	0	0
TEPSIN	301.815	2.07647	0.124664	16.6566	2.71141e-62	3.14203e-61
U2AF1L4	95.276	2.07575	0.21578	9.61975	6.59918e-22	3.3997e-21
DEPP1	121.661	2.07574	0.200143	10.3713	3.35065e-25	1.87967e-24
H1-2	249.322	2.07569	0.148909	13.9394	3.65202e-44	3.05956e-43
TUFT1	3272.47	2.07493	0.0476423	43.5523	0	0
CDH26	35.7083	2.0726	0.362951	5.71042	1.12699e-08	3.64469e-08
CDYL2	11.8909	2.07193	0.607043	3.41315	0.000642166	0.00148757
ZNF433	36.1483	2.07157	0.350275	5.91412	3.33653e-09	1.10884e-08
CEP97	295.895	2.06606	0.127348	16.2237	3.42831e-59	3.76456e-58
DDR2	31.4375	2.06564	0.379147	5.44811	5.09087e-08	1.59453e-07
BATF	15.7437	2.06464	0.539918	3.82399	0.000131309	0.000325925
NAA25	3047.69	2.06409	0.0577872	35.7188	2.01833e-279	1.95712e-277
DYSF	72.3583	2.06336	0.251067	8.21838	2.06266e-16	8.9485e-16
PCDH12	10.2729	2.06291	0.673989	3.06075	0.00220784	0.00480559
GPR146	16.5736	2.0626	0.53153	3.8805	0.000104244	0.000260704
AC008687.4	7.03751	2.06228	0.804731	2.5627	0.0103862	0.0206369
IFRD1	3008.81	2.06213	0.0576985	35.7398	9.53517e-280	9.28432e-278
SCPEP1	1447.66	2.05994	0.0654691	31.4643	2.67553e-217	1.59756e-215
H2AC8	23.6277	2.05926	0.433366	4.75178	2.01634e-06	5.7345e-06
CLDND1	1236.12	2.05799	0.0686231	29.9898	1.33469e-197	6.76456e-196
WDR44	931.546	2.05793	0.0762623	26.985	2.21903e-160	8.07313e-159
TPPP	26.8204	2.05712	0.408251	5.03886	4.68307e-07	1.38701e-06
BCL10	457.911	2.05656	0.103759	19.8207	1.97503e-87	3.29397e-86
RAPGEF3	32.0682	2.05563	0.37499	5.48183	4.20958e-08	1.3238e-07
CHMP5	2506.91	2.05528	0.0517128	39.7442	0	0
BCL2L2-PABPN1	6.26802	2.05365	0.886552	2.31645	0.0205338	0.0385631
SMPDL3A	599.451	2.05339	0.0930059	22.078	5.14079e-108	1.11389e-106
POFUT2	1225.06	2.05276	0.0694254	29.5679	3.86982e-192	1.88011e-190
TFAP2A	22.0324	2.0511	0.463023	4.42981	9.4317e-06	2.55955e-05
H2BC15	21.7143	2.04733	0.481744	4.24982	2.13938e-05	5.65283e-05
LYPD3	41.9346	2.04491	0.331231	6.17367	6.67211e-10	2.28399e-09
DNAJA1	18553.3	2.04436	0.0353967	57.7556	0	0
TMPRSS9	12.3835	2.04365	0.594258	3.43899	0.000583889	0.00135861
PNPLA2	1178.9	2.04294	0.0677525	30.153	9.80422e-200	5.07872e-198
TMEM218	506.578	2.0425	0.0980659	20.8278	2.42183e-96	4.5068e-95
GPRC5A	13765.2	2.04195	0.0350349	58.2834	0	0
HUS1B	9.26619	2.04003	0.684511	2.98027	0.00287997	0.00618368
C12orf57	284.156	2.03948	0.128018	15.9312	3.84773e-57	4.08926e-56
PSAP	75502.6	2.03925	0.0349825	58.2935	0	0
SWT1	215.927	2.03857	0.147528	13.8181	1.98115e-43	1.63985e-42
EGFL8	156.019	2.0381	0.186594	10.9227	8.98195e-28	5.32922e-27
SLPI	58.7452	2.0376	0.281712	7.23294	4.72654e-13	1.83905e-12
UBALD2	570.473	2.03637	0.0935733	21.7623	5.27839e-105	1.10296e-103
ZNF407	243.243	2.03613	0.136993	14.8631	5.72571e-50	5.35297e-49
CFAP53	5.46797	2.03606	0.890239	2.28709	0.0221903	0.041376
SPATA2	1979.7	2.03352	0.0601761	33.7929	2.50716e-250	2.00112e-248
SLC3A2	29738.7	2.03282	0.0358984	56.6271	0	0
ABCC5	2024.86	2.03185	0.0547264	37.1274	1.0164e-301	1.145e-299
EPC1	1349.3	2.03013	0.0693248	29.2843	1.645e-188	7.61371e-187
ZNF461	122.201	2.02948	0.192504	10.5425	5.50141e-26	3.14408e-25
USP50	12.2898	2.02772	0.592892	3.42004	0.000626109	0.00145238
TXNL1	2522.33	2.02193	0.0649965	31.1083	1.86274e-212	1.06353e-210
RC3H1	1209.04	2.02149	0.0714249	28.3022	3.24406e-176	1.36425e-174
ZNF844	14.7022	2.02099	0.547663	3.69021	0.000224066	0.000544638
MOB2	799.459	2.02075	0.0800534	25.2425	1.36992e-140	4.11081e-139
ZNF622	2377.51	2.018	0.0542453	37.2014	6.48727e-303	7.35412e-301
PLEKHM3	410.996	2.01561	0.107396	18.768	1.38075e-78	2.03138e-77
TSC1	2019.15	2.01526	0.0603517	33.392	1.78998e-244	1.35496e-242
NARF	1565.93	2.01427	0.0605075	33.2896	5.4668e-243	4.05962e-241
RSBN1	405.682	2.0142	0.107827	18.6799	7.21821e-78	1.05011e-76
C1orf52	607.18	2.01332	0.0920472	21.8726	4.73336e-106	1.00428e-104
ANKRD42	447.57	2.01199	0.10693	18.8159	5.59776e-79	8.27707e-78
WDR66	28.9993	2.01153	0.39152	5.13773	2.7807e-07	8.35385e-07
CCDC160	6.86881	2.01142	0.798746	2.51822	0.0117949	0.02321
ZC3H12D	64.0026	2.00937	0.286922	7.00322	2.50151e-12	9.44649e-12
ELK3	24.9951	2.00643	0.413955	4.84699	1.25348e-06	3.61443e-06
ABCB6	306.131	2.00633	0.130866	15.3312	4.72892e-53	4.66256e-52
ASIC3	9.05731	2.00512	0.70749	2.83413	0.00459511	0.00959587
EAF1	1490.18	2.00427	0.0607276	33.0043	7.03526e-239	5.11113e-237
GDAP2	594.056	2.00385	0.093555	21.419	8.89663e-102	1.77524e-100
RAB22A	2254.39	2.00309	0.0673801	29.7282	3.31515e-194	1.63089e-192
EPS8	1118.32	2.00045	0.0770397	25.9665	1.18495e-148	3.83532e-147
PSME4	8972.69	1.99909	0.0441342	45.2956	0	0
LIN54	1269.42	1.99857	0.0661507	30.2124	1.62986e-200	8.49917e-199
FBXL20	186.851	1.99828	0.156238	12.79	1.86533e-37	1.36659e-36
B9D2	62.9903	1.99814	0.263266	7.58982	3.20362e-14	1.29703e-13
FLCN	1234.19	1.99811	0.0674106	29.641	4.4361e-193	2.1687e-191
PRR4	8.95057	1.9961	0.699214	2.85478	0.00430669	0.00902894
NRARP	494.761	1.99139	0.13115	15.184	4.51209e-52	4.36862e-51
WDR86	10.6135	1.98901	0.636783	3.12352	0.00178701	0.00393894
CDK3	11.4667	1.98883	0.652199	3.04942	0.00229285	0.00498185
GPX3	3771.9	1.98811	0.0514266	38.6592	0	0
FAM160A1	1096.92	1.98729	0.0689178	28.8357	7.66179e-183	3.3923e-181
FLNC	7970.55	1.98606	0.0403595	49.2092	0	0
SKIL	295.385	1.98289	0.12446	15.932	3.80184e-57	4.04416e-56
PCGF1	442.195	1.98072	0.10587	18.7089	4.18767e-78	6.1226e-77
WDR83	140.113	1.97929	0.185745	10.6559	1.63629e-26	9.44814e-26
GPAT3	634.306	1.97866	0.0889183	22.2526	1.06497e-109	2.33774e-108
ZNF256	10.4026	1.97856	0.638964	3.09652	0.00195808	0.00429584
MEIOC	19.1457	1.9759	0.494006	3.99975	6.34092e-05	0.00016184
VCPIP1	578.31	1.97462	0.0909664	21.7072	1.75511e-104	3.6415e-103
PI4K2A	1409.25	1.97352	0.0640687	30.8031	2.37935e-208	1.32622e-206
SMURF1	1375	1.96821	0.0667274	29.4963	3.21285e-191	1.54493e-189
ZNF410	20.5794	1.96788	0.465188	4.23028	2.33397e-05	6.15035e-05
PHF1	887.061	1.96677	0.0769131	25.5713	3.18549e-144	9.83562e-143
AKAP8L	1921.08	1.96564	0.0593931	33.0955	3.45198e-240	2.53138e-238
PNP	2252.22	1.96486	0.059817	32.8479	1.22157e-236	8.76613e-235
TFF1	106.307	1.95986	0.204562	9.58074	9.635e-22	4.93765e-21
FASTKD5	2698.6	1.95983	0.0514268	38.1092	0	0
DHRS3	561.07	1.95965	0.0924387	21.1994	9.6686e-100	1.86735e-98
IGLON5	6.71962	1.95816	0.79743	2.45559	0.0140653	0.0273248
HLA-C	6232.98	1.95763	0.044961	43.5407	0	0
VPS4B	1381.11	1.95424	0.0658878	29.6602	2.50812e-193	1.22872e-191
GCLC	2599.79	1.95337	0.0526574	37.0959	3.26954e-301	3.65348e-299
ARHGEF28	556.644	1.95323	0.0924895	21.1184	5.38963e-99	1.03412e-97
TANK	1046.56	1.9517	0.0771723	25.2902	4.09364e-141	1.23156e-139
DUSP14	2022.63	1.95005	0.0585319	33.316	2.26836e-243	1.69521e-241
CHST7	73.1565	1.94839	0.271112	7.18665	6.64008e-13	2.57165e-12
NCOA3	6087.84	1.94677	0.0459374	42.3788	0	0
PHEX	26.3073	1.9426	0.407573	4.76627	1.87665e-06	5.345e-06
PAN3	1322.69	1.94194	0.0704143	27.5788	1.99919e-167	7.71595e-166
ACSL3	8357.84	1.93792	0.0453808	42.7036	0	0
LGMN	3306.25	1.9379	0.046417	41.7497	0	0
EMC3	2078.21	1.93629	0.0588137	32.9224	1.05188e-237	7.59493e-236
RGS16	91.9957	1.93599	0.228937	8.45642	2.75717e-17	1.23027e-16
PLIN4	7.20027	1.9331	0.782784	2.46952	0.0135294	0.0263492
AC097625.2	8.02939	1.93288	0.727525	2.65679	0.00788886	0.0159779
SERTAD3	843.372	1.92814	0.0826945	23.3165	3.01723e-120	7.26923e-119
TP53INP2	969.123	1.92773	0.0748161	25.7662	2.12227e-146	6.67578e-145
AFF4	5414.64	1.92731	0.0477283	40.381	0	0
SLC25A25	898.56	1.92676	0.0753568	25.5685	3.42005e-144	1.0546e-142
GPATCH2L	1595.32	1.92635	0.0671103	28.7043	3.37339e-181	1.47138e-179
SMG1	8904.95	1.92298	0.050453	38.1142	0	0
ANXA1	1457.98	1.92283	0.0639248	30.0796	8.95718e-199	4.56933e-197
NMB	237.959	1.92135	0.139171	13.8057	2.35609e-43	1.94882e-42
KDM5B	3018.51	1.92117	0.0475909	40.3684	0	0
ATP6V1G2	7.39008	1.92086	0.77872	2.4667	0.0136366	0.0265492
STPG4	8.51685	1.92077	0.724855	2.64987	0.00805228	0.0162808
TRIM22	7.45215	1.9207	0.818539	2.3465	0.0189505	0.0358219
HECA	174.923	1.92056	0.165771	11.5857	4.87193e-31	3.11597e-30
SYF2	1062.31	1.91878	0.0718843	26.6927	5.72743e-157	2.00298e-155
PLEKHB2	11236.2	1.91842	0.034927	54.9266	0	0
ELF3	1943.63	1.9183	0.0606588	31.6244	1.70734e-219	1.04334e-217
BTG1	805.613	1.91714	0.084279	22.7475	1.51801e-114	3.47868e-113
LPAR6	8.71638	1.91685	0.734085	2.61121	0.00902216	0.018103
MPIG6B	16.4605	1.91556	0.513555	3.73	0.000191478	0.000467947
SLC6A13	5.80866	1.91424	0.847808	2.25786	0.0239541	0.0443664
HIVEP1	1206.28	1.91307	0.075747	25.256	9.73566e-141	2.92518e-139
ZNF684	63.4648	1.91066	0.260985	7.32097	2.46191e-13	9.68338e-13
ING1	743.609	1.90449	0.0817259	23.3033	4.10221e-120	9.85286e-119
ZNF562	879.009	1.90374	0.0766408	24.8398	3.3346e-136	9.49634e-135
DNAAF1	10.8981	1.90334	0.631859	3.01229	0.00259283	0.00559736
KLHL28	145.182	1.9017	0.185634	10.2443	1.2548e-24	6.93804e-24
CPEB3	60.3756	1.90058	0.269437	7.05389	1.73984e-12	6.61487e-12
C12orf49	4457.12	1.89838	0.0505006	37.5913	0	0
VGF	93.328	1.89326	0.224467	8.43446	3.32748e-17	1.48052e-16
MAPRE3	176.284	1.89274	0.163375	11.5853	4.89443e-31	3.1295e-30
TAS1R3	7.76225	1.89032	0.74246	2.54602	0.010896	0.0215676
PIK3C3	647.823	1.88927	0.0897853	21.0421	2.70192e-98	5.15892e-97
FBXO33	504.678	1.88806	0.101335	18.6319	1.77073e-77	2.55547e-76
CHD2	3868.14	1.8869	0.0553651	34.081	1.40908e-254	1.15614e-252
SOCS3	286.214	1.88673	0.126878	14.8704	5.13075e-50	4.80056e-49
GULP1	1057.24	1.88657	0.0770757	24.4769	2.60404e-132	7.18055e-131
ABL2	1880.3	1.88657	0.0613605	30.7457	1.3962e-207	7.69091e-206
PSMD12	4596.68	1.88628	0.05795	32.5502	2.08187e-232	1.42429e-230
SLC17A7	10.2021	1.88608	0.680407	2.77198	0.0055716	0.0115121
MARCHF5	817.257	1.88513	0.0803332	23.4664	8.99485e-122	2.21019e-120
NGDN	2272.03	1.8847	0.0550991	34.2057	1.98832e-256	1.64288e-254
TUT7	946.011	1.88374	0.0791796	23.7908	4.16204e-125	1.057e-123
UCP3	10.6554	1.87934	0.648814	2.89657	0.00377264	0.00797628
NFIL3	405.383	1.87927	0.1066	17.6291	1.47252e-69	1.90486e-68
NPIPB11	10.6203	1.87811	0.629356	2.98417	0.00284345	0.00611029
AL031708.1	16.6705	1.87547	0.520524	3.60304	0.000314512	0.000755253
BLOC1S2	1712.28	1.87518	0.0577107	32.4928	1.34577e-231	9.18017e-230
TUBB1	34.0934	1.87459	0.35723	5.24757	1.54117e-07	4.69434e-07
AKIRIN2	1311.99	1.87415	0.0722028	25.9567	1.52841e-148	4.9266e-147
PTGR1	1460.68	1.87412	0.0650166	28.8253	1.03454e-182	4.57184e-181
ATP6V1G1	3822.31	1.87375	0.0529716	35.3728	4.47706e-274	4.10386e-272
BRAP	1471.33	1.87371	0.0655065	28.6034	6.10262e-180	2.64214e-178
ZNF230	205.546	1.87348	0.152028	12.3233	6.78685e-35	4.71882e-34
KLF6	6432.14	1.87233	0.0521902	35.8752	7.44531e-282	7.27966e-280
ATXN1	236.747	1.87224	0.138878	13.4812	2.01751e-41	1.60702e-40
TRIB1	2204.22	1.87152	0.0525039	35.6454	2.78068e-278	2.66332e-276
C17orf49	9.18894	1.87094	0.695865	2.68865	0.00717421	0.0146074
SH3RF1	1439.23	1.87085	0.0643374	29.0787	6.66627e-186	3.0434e-184
TMCC3	83.9355	1.87079	0.229332	8.15755	3.41878e-16	1.47527e-15
AFTPH	1599.72	1.87043	0.0649118	28.8149	1.39722e-182	6.15143e-181
ZNF317	1422.79	1.87024	0.0633723	29.5119	2.02676e-191	9.76592e-190
SPNS1	38.9408	1.86439	0.333667	5.58758	2.30255e-08	7.33727e-08
FAM217A	22.6314	1.8625	0.445555	4.18018	2.91282e-05	7.62774e-05
HMGN5	18.5169	1.86213	0.491952	3.78519	0.00015359	0.000379143
ANKZF1	1392.94	1.86211	0.0630177	29.5489	6.7834e-192	3.28883e-190
JMJD6	1530.16	1.8611	0.0633197	29.3922	6.91689e-190	3.27903e-188
KCTD10	2933.04	1.85972	0.0504778	36.8424	3.87096e-297	4.20537e-295
CBLL1	972.304	1.85922	0.0748481	24.8399	3.32671e-136	9.48536e-135
MGAM	19.2536	1.85735	0.501168	3.70604	0.000210526	0.000513054
CRISPLD2	107.45	1.85336	0.211019	8.7829	1.59308e-18	7.39382e-18
SLC45A4	440.941	1.85307	0.101959	18.1746	8.20206e-74	1.12555e-72
CLN3	15.4351	1.85253	0.526487	3.51866	0.000433728	0.00102476
DNAH10	11.8368	1.85041	0.597889	3.09491	0.00196875	0.00431763
SCARF1	6.95972	1.85017	0.807244	2.29196	0.0219077	0.0408946
HLA-B	942.668	1.84623	0.0800595	23.0607	1.14875e-117	2.70648e-116
E2F6	1077.63	1.84578	0.0694875	26.5628	1.82907e-155	6.27501e-154
FAM160B1	518.958	1.84552	0.100375	18.3862	1.69432e-75	2.38506e-74
OSR1	44.063	1.84515	0.315944	5.84013	5.21613e-09	1.71623e-08
ZNF571	53.3594	1.84096	0.284591	6.46879	9.87883e-11	3.51025e-10
CTDP1	809.353	1.84041	0.0779616	23.6066	3.29796e-123	8.21548e-122
IER2	638.331	1.84023	0.0902936	20.3805	2.49237e-92	4.39414e-91
ARHGAP31	36.8379	1.83961	0.360812	5.09854	3.42285e-07	1.02293e-06
CCDC32	158.976	1.83793	0.16478	11.1538	6.86085e-29	4.17198e-28
LMTK2	1843.04	1.83773	0.0571837	32.1374	1.32594e-226	8.54794e-225
NR4A1	810.2	1.83703	0.0766839	23.9559	8.01722e-127	2.08572e-125
NPPA	11.9462	1.83649	0.617598	2.97361	0.0029432	0.0063079
ERO1B	35.7952	1.83565	0.354192	5.18265	2.1875e-07	6.60981e-07
PSMA6	519.628	1.83288	0.096043	19.0839	3.43368e-81	5.23893e-80
RAB30	904.732	1.8326	0.0777675	23.5651	8.78945e-123	2.18257e-121
GAREM1	35.2779	1.83226	0.347451	5.27342	1.33905e-07	4.09516e-07
GOLGA6L10	15.2837	1.82753	0.534507	3.41909	0.000628316	0.00145721
DNTTIP2	2867.32	1.82742	0.058406	31.2883	6.73929e-215	3.96351e-213
ZNF850	180.696	1.82618	0.162796	11.2176	3.34148e-29	2.04782e-28
KDM2A	9136.25	1.82552	0.0398589	45.7996	0	0
KCMF1	2831.61	1.82352	0.0538545	33.8601	2.57956e-251	2.08731e-249
CNOT8	1465.14	1.82327	0.0652724	27.9333	1.05278e-171	4.27413e-170
PISD	2684.33	1.81964	0.0585313	31.0883	3.46387e-212	1.96336e-210
DCTN4	2807.46	1.81811	0.0561048	32.4056	2.2919e-230	1.54102e-228
PIGA	551.646	1.8178	0.0952645	19.0816	3.59198e-81	5.47334e-80
INO80B	14.4033	1.81579	0.542267	3.34851	0.000812476	0.00186096
NR5A2	302.778	1.8148	0.12143	14.9452	1.67436e-50	1.58111e-49
SBNO1	4170.21	1.81402	0.0458274	39.5837	0	0
UBE2V1	226.656	1.81377	0.145793	12.4407	1.57055e-35	1.10974e-34
CRYM	9.15685	1.81344	0.733018	2.47394	0.0133633	0.0260537
STAM	2642.25	1.81311	0.052718	34.3927	3.24593e-259	2.74979e-257
UBR2	2190.12	1.81299	0.0571447	31.7264	6.72635e-221	4.14279e-219
SLC47A2	12.3635	1.81227	0.589603	3.07372	0.00211409	0.00461224
UBXN4	5746.43	1.81053	0.0436997	41.4312	0	0
ZNF420	25.8242	1.81006	0.409125	4.42423	9.67863e-06	2.62535e-05
SPRY4	847.252	1.80924	0.077673	23.2931	5.21084e-120	1.24901e-118
SLC26A1	153.71	1.80891	0.167047	10.8287	2.51603e-27	1.47824e-26
USHBP1	14.162	1.80875	0.569618	3.17538	0.00149642	0.00333033
SMOX	1877.73	1.80759	0.0555142	32.5609	1.4684e-232	1.00753e-230
MED23	1272.76	1.80708	0.0726793	24.8637	1.83829e-136	5.25423e-135
FRK	582.683	1.80683	0.102926	17.5546	5.48209e-69	7.05278e-68
LZTFL1	402.626	1.80667	0.118997	15.1825	4.61706e-52	4.46779e-51
NIPAL3	317.738	1.8048	0.122893	14.686	7.92403e-49	7.25782e-48
KDM4A	530.842	1.80445	0.104833	17.2126	2.13733e-66	2.65649e-65
ATG101	1009.91	1.80395	0.072832	24.7686	1.95366e-135	5.51017e-134
SREK1IP1	1017.52	1.80341	0.0715867	25.192	4.90163e-140	1.46152e-138
ALS2	2965.56	1.8026	0.0498061	36.1924	8.00568e-287	8.13253e-285
FERMT3	46.55	1.80223	0.303568	5.93684	2.90573e-09	9.691e-09
ZNF165	373.781	1.80085	0.113616	15.8503	1.39921e-56	1.4671e-55
GPNMB	29.2425	1.80031	0.388037	4.63954	3.49189e-06	9.78163e-06
ZBTB7B	1180.17	1.8003	0.0677617	26.5681	1.58535e-155	5.45482e-154
RAE1	7068.65	1.79971	0.0418829	42.9701	0	0
PPP1R12B	786.387	1.79939	0.086607	20.7765	7.05692e-96	1.30598e-94
CDK11B	1366.06	1.79918	0.0645397	27.8771	5.05542e-171	2.02787e-169
JMJD1C	4946.06	1.79862	0.0512699	35.0815	1.29016e-269	1.16442e-267
HBA1	8.84544	1.79803	0.692595	2.59608	0.00942951	0.0188526
STK17A	1221.4	1.79781	0.0860249	20.8988	5.49548e-97	1.03001e-95
LIPH	328.632	1.79347	0.116223	15.4312	1.00925e-53	1.0065e-52
CCDC12	1508.61	1.79314	0.0654747	27.3867	3.9484e-165	1.49924e-163
ACTA1	22.2648	1.79279	0.457726	3.91673	8.97586e-05	0.000225729
MSMO1	2718.07	1.79037	0.136865	13.0813	4.21139e-39	3.19098e-38
UPP1	1017.33	1.78973	0.076001	23.5487	1.29376e-122	3.20246e-121
UBE2H	2410.92	1.7893	0.0511163	35.0045	1.92467e-268	1.71727e-266
TMCC1	882.124	1.7892	0.0753778	23.7364	1.51946e-124	3.84221e-123
KCNH2	17.5866	1.78899	0.50508	3.54199	0.000397122	0.000942251
ATL1	22.9501	1.78897	0.422965	4.2296	2.34103e-05	6.16828e-05
RELN	15.0225	1.78738	0.539145	3.31522	0.000915715	0.00208481
IKBKG	198.314	1.7871	0.148458	12.0377	2.25126e-33	1.51936e-32
ACSBG1	9.91824	1.7869	0.672571	2.65681	0.00788836	0.0159779
ARID4B	1956.91	1.78361	0.0586602	30.4058	4.61002e-203	2.45861e-201
RTN4	12630.9	1.7831	0.0553167	32.2344	5.82948e-228	3.83178e-226
CXXC1	770.787	1.78225	0.0813918	21.8972	2.76509e-106	5.88264e-105
SPSB3	12.7517	1.78192	0.568242	3.13584	0.00171363	0.00378716
GJC2	12.0539	1.78181	0.589738	3.02136	0.00251645	0.00544248
CNTF	60.5288	1.78171	0.263786	6.75441	1.4342e-11	5.266e-11
TNFRSF10B	2971.3	1.78067	0.05304	33.5722	4.2711e-247	3.30778e-245
SERPIND1	28.8372	1.77929	0.383151	4.64382	3.42018e-06	9.58877e-06
COL17A1	19.6631	1.7791	0.464706	3.82844	0.000128959	0.000320328
LGALS4	13.0462	1.77902	0.688923	2.58233	0.00981367	0.0195706
R3HCC1L	987.475	1.77704	0.072761	24.4229	9.76463e-132	2.67683e-130
SELENOP	390.323	1.77614	0.112377	15.8053	2.86182e-56	2.98071e-55
EWSR1	13025.2	1.77458	0.0406447	43.6608	0	0
WDR20	889.286	1.77388	0.0734818	24.1404	9.42817e-129	2.49708e-127
DYRK1A	1773.83	1.7734	0.0640147	27.7031	6.41071e-169	2.52406e-167
TFPT	351.262	1.77295	0.115034	15.4124	1.35161e-53	1.34622e-52
PSMA2	199.382	1.77146	0.150235	11.7913	4.33057e-32	2.83858e-31
KATNBL1	454.289	1.77107	0.11374	15.5712	1.14266e-54	1.15926e-53
JAKMIP3	30.8428	1.77005	0.365712	4.84002	1.29827e-06	3.73944e-06
WIPI2	2877.72	1.76938	0.0498053	35.526	1.95105e-276	1.83133e-274
CLK1	2489.12	1.76704	0.0590393	29.9298	8.05355e-197	4.04678e-195
LAMTOR3	1034.51	1.7669	0.0718544	24.59	1.61461e-133	4.50517e-132
PRDM1	132.699	1.76421	0.189137	9.32767	1.08228e-20	5.36701e-20
GRN	4429.45	1.76294	0.0521161	33.8271	7.88194e-251	6.33417e-249
TESK2	216.882	1.76293	0.160656	10.9733	5.1343e-28	3.06803e-27
FAM126B	619.181	1.76245	0.0913245	19.2988	5.49628e-83	8.59265e-82
ATP6V0B	2350.58	1.76237	0.0521892	33.769	5.6351e-250	4.48248e-248
JPT1	4908.45	1.76193	0.0420198	41.9309	0	0
GLRX	574.283	1.76052	0.0936138	18.8062	6.71439e-79	9.92191e-78
CNOT4	813.709	1.75929	0.0807888	21.7764	3.88061e-105	8.12331e-104
WASHC2A	2966.83	1.75746	0.0470998	37.3135	9.91416e-305	1.12935e-302
INA	9.21973	1.75725	0.695603	2.52623	0.0115294	0.0227296
ARL14	42.417	1.75654	0.316313	5.55317	2.80533e-08	8.89593e-08
C11orf54	143.933	1.7563	0.1743	10.0763	7.03137e-24	3.8097e-23
EPHA4	2245.21	1.7555	0.0596207	29.4445	1.4797e-190	7.0718e-189
DNAJC3	1939.59	1.75418	0.0721196	24.3232	1.11436e-130	3.02307e-129
RBBP6	3382.36	1.75394	0.0509291	34.4388	6.62912e-260	5.63619e-258
SLC12A6	468.082	1.7532	0.104602	16.7607	4.73299e-63	5.55044e-62
SYTL4	567.226	1.75296	0.091118	19.2383	1.76861e-82	2.74485e-81
ZNF654	355.124	1.75241	0.119353	14.6826	8.33498e-49	7.62827e-48
RNF125	8.72057	1.75199	0.70588	2.482	0.0130648	0.0255249
GNAI1	45.2859	1.7519	0.311929	5.61635	1.9503e-08	6.23767e-08
ZNF597	302.697	1.75158	0.123744	14.1548	1.7432e-45	1.49894e-44
CRY2	1408.63	1.74945	0.0633483	27.6163	7.09255e-168	2.76928e-166
AREL1	2508.88	1.74661	0.0520837	33.5347	1.50308e-246	1.15644e-244
PSPN	84.1786	1.74528	0.224539	7.7727	7.68282e-15	3.17907e-14
AC072022.2	17.9926	1.74511	0.485976	3.59095	0.00032948	0.000789501
IQCG	44.2244	1.74446	0.310351	5.62093	1.89932e-08	6.07959e-08
P4HA2	1883.82	1.74443	0.0548208	31.8205	3.36594e-222	2.0951e-220
BANP	620.771	1.74413	0.090588	19.2535	1.32003e-82	2.05138e-81
LMBR1L	434.39	1.74201	0.10214	17.0551	3.20318e-65	3.88453e-64
CTSD	3966.87	1.74168	0.059474	29.2847	1.62653e-188	7.54313e-187
HACL1	1135.23	1.74063	0.0672189	25.895	7.5833e-148	2.42769e-146
RTN3	7300.35	1.73914	0.0373508	46.5624	0	0
SUPT6H	10060.1	1.73845	0.0446443	38.94	0	0
KLHL18	1334.71	1.73683	0.0644642	26.9426	6.97043e-160	2.51257e-158
AFF1	1702.44	1.73623	0.0575936	30.1463	1.20082e-199	6.19306e-198
ZNF529	285.213	1.73591	0.128368	13.523	1.14429e-41	9.17383e-41
INSIG2	480.982	1.7358	0.101702	17.0675	2.5921e-65	3.15325e-64
ZNF707	295.323	1.73532	0.122256	14.1942	9.94992e-46	8.59348e-45
NAV3	105.187	1.73522	0.205906	8.42727	3.53809e-17	1.57274e-16
CWC22	1919	1.73401	0.0657208	26.3845	2.06258e-153	6.97412e-152
CD72	8.63069	1.7317	0.700104	2.47349	0.0133802	0.0260824
WDR37	883.909	1.73074	0.0807963	21.421	8.51077e-102	1.69969e-100
SAV1	979.194	1.72964	0.0742333	23.3	4.42955e-120	1.06282e-118
HERC3	7.82949	1.72953	0.724322	2.3878	0.0169497	0.0323762
PIM3	1598.94	1.72866	0.0605067	28.5697	1.60141e-179	6.88256e-178
SAMD8	1406.38	1.72835	0.0697032	24.7959	9.92987e-136	2.81758e-134
EIF1	10780.2	1.72817	0.0405584	42.6094	0	0
RORA	403.547	1.72729	0.110514	15.6297	4.57029e-55	4.66288e-54
FBXW7	805.762	1.72694	0.0862958	20.0119	4.33578e-89	7.39414e-88
ALKBH6	117.225	1.72666	0.192146	8.98617	2.56002e-19	1.21754e-18
MAFK	1429.79	1.72632	0.0634079	27.2256	3.23146e-163	1.20502e-161
SPSB1	591.023	1.72534	0.0907367	19.0148	1.28525e-80	1.94453e-79
STK11IP	745.482	1.7251	0.0797779	21.6238	1.07166e-103	2.19247e-102
STX1A	337.742	1.72473	0.115443	14.9401	1.80569e-50	1.70444e-49
GAPDH	103840	1.72454	0.0362331	47.5956	0	0
PLAAT4	30.8547	1.72411	0.373921	4.61089	4.00945e-06	1.11688e-05
HMGCS1	13498.5	1.72322	0.0492221	35.0091	1.63335e-268	1.46291e-266
PFDN1	3022.09	1.72214	0.0478532	35.9881	1.28573e-283	1.26769e-281
LGALS8	1668.66	1.72203	0.0585466	29.4129	3.75367e-190	1.78669e-188
DNAJC2	5035.04	1.72116	0.0452055	38.074	0	0
CORO2B	8.29191	1.71936	0.724153	2.37431	0.0175818	0.0334746
TRAF6	737.081	1.71866	0.0829045	20.7306	1.83465e-95	3.37928e-94
TSPAN1	14.9398	1.71676	0.522906	3.28311	0.0010267	0.00232553
FAM214B	280.291	1.71544	0.127996	13.4024	5.85726e-41	4.62316e-40
GPBP1L1	1925.71	1.71529	0.0563045	30.4646	7.66994e-204	4.09984e-202
OTUD1	99.2701	1.71437	0.206706	8.29373	1.09753e-16	4.80318e-16
AZIN2	17.4915	1.7122	0.487737	3.51049	0.000447282	0.00105561
RBBP5	1313.28	1.71093	0.0673587	25.4002	2.50805e-142	7.60387e-141
CLPB	2004.81	1.71067	0.0542817	31.5147	5.45828e-218	3.2758e-216
ZNF263	1840.84	1.71043	0.0637791	26.818	1.99375e-158	7.0887e-157
ZFAND6	1023.38	1.7104	0.0779206	21.9505	8.5569e-107	1.83208e-105
RIMKLB	17.9117	1.70824	0.490934	3.47956	0.000502238	0.00117643
MED10	1425.97	1.70695	0.064029	26.659	1.40818e-156	4.89548e-155
GPR37L1	8.33102	1.70675	0.712328	2.39602	0.0165742	0.0317055
AMBP	39.3731	1.70601	0.326725	5.22156	1.77427e-07	5.38476e-07
ERN1	722.038	1.70555	0.0808341	21.0993	8.06441e-99	1.54481e-97
JUN	1427.96	1.70465	0.0648329	26.2929	2.30983e-152	7.72115e-151
OSBPL2	3781.5	1.70424	0.0471057	36.1791	1.29707e-286	1.31194e-284
TUBA1C	7290.36	1.70402	0.0423098	40.2749	0	0
ZNF335	1812.9	1.70376	0.0632408	26.9409	7.28836e-160	2.62314e-158
GLUL	8266.22	1.70335	0.0532562	31.9841	1.81609e-224	1.1456e-222
ATP6V0E1	5208.04	1.70306	0.0463542	36.7402	1.66772e-295	1.79517e-293
SUPT5H	6669.45	1.70288	0.0445814	38.197	0	0
GBP3	21.6103	1.70238	0.465363	3.65818	0.00025401	0.000614811
GRHL1	402.521	1.70176	0.105766	16.0898	3.00887e-58	3.26125e-57
TENT5C	1103.62	1.70143	0.0757793	22.4524	1.21235e-111	2.70428e-110
TMCC2	19.0385	1.69779	0.489167	3.47077	0.000518964	0.00121368
HDAC9	26.9456	1.69666	0.388863	4.36314	1.28209e-05	3.44859e-05
TNKS	1183.85	1.69656	0.0711561	23.8429	1.20062e-125	3.08247e-124
UGDH	3290.69	1.69639	0.0486231	34.8887	1.10445e-266	9.70676e-265
TRIM11	1422.39	1.69627	0.0602273	28.1645	1.59179e-174	6.61115e-173
MXI1	224.059	1.69426	0.139722	12.1259	7.70029e-34	5.25888e-33
ELOC	1714.43	1.69039	0.070263	24.058	6.8796e-128	1.80983e-126
KCNAB1	19.8347	1.68913	0.45249	3.73297	0.000189234	0.000462849
PSMC1	1500.5	1.68907	0.0650666	25.9592	1.43338e-148	4.63301e-147
RAG1	12.8411	1.68786	0.574564	2.93764	0.00330723	0.00704946
MT1X	33.5471	1.68715	0.373153	4.52134	6.14489e-06	1.68907e-05
EYA3	670.523	1.68711	0.0837093	20.1544	2.46163e-90	4.2474e-89
HCFC1	6167.88	1.68679	0.0390824	43.1599	0	0
KDM7A	219.353	1.6859	0.144568	11.6616	2.0021e-31	1.29211e-30
DDX58	370.997	1.6855	0.113376	14.8664	5.44405e-50	5.09167e-49
BCO2	30.5123	1.6854	0.379261	4.44391	8.83406e-06	2.40404e-05
AIP	2638.83	1.68525	0.0533734	31.5747	8.21376e-219	4.99337e-217
AHR	479.154	1.68434	0.108816	15.4788	4.82639e-54	4.82762e-53
YTHDC1	3483.75	1.68394	0.045936	36.6584	3.36093e-294	3.60126e-292
CBLB	590.583	1.68313	0.0908578	18.5249	1.30109e-76	1.86167e-75
ZNF490	42.2472	1.68161	0.31542	5.33134	9.74883e-08	3.00218e-07
LVRN	9.66731	1.68086	0.658693	2.55181	0.0107165	0.0212448
ZBTB46	126.019	1.68055	0.182645	9.20116	3.54114e-20	1.72901e-19
DLL1	259.22	1.67923	0.143133	11.732	8.73909e-32	5.68853e-31
STK35	2587.03	1.67881	0.0502136	33.4333	4.49859e-245	3.43857e-243
TFIP11	1104.88	1.6776	0.0719167	23.327	2.36053e-120	5.71643e-119
PRDX1	15344.4	1.67751	0.0470259	35.6721	1.07193e-278	1.03514e-276
IPMK	559.674	1.67655	0.0942816	17.7824	9.67631e-71	1.27207e-69
CHRNB1	38.5469	1.67638	0.341108	4.91452	8.90016e-07	2.58767e-06
RANBP10	1644.43	1.67528	0.0605227	27.6802	1.20972e-168	4.74705e-167
FTH1	3299.17	1.67495	0.0533265	31.4093	1.51163e-216	9.00302e-215
UBE2O	1836.32	1.67464	0.0631846	26.5039	8.73355e-155	2.97448e-153
GUK1	1462.6	1.67326	0.0668839	25.0173	3.96247e-138	1.15795e-136
NAXD	2096.68	1.67298	0.0530462	31.5381	2.61109e-218	1.57917e-216
NUP50	5312.1	1.67262	0.0424322	39.4187	0	0
LSG1	2810.93	1.67228	0.0495474	33.7511	1.02867e-249	8.15499e-248
RIPOR3	10.1271	1.67045	0.65507	2.55004	0.0107711	0.0213404
NPLOC4	5395.04	1.66991	0.0417982	39.9516	0	0
PSMB3	9313.74	1.66957	0.0406539	41.068	0	0
TAF7	4260.14	1.66889	0.0450609	37.0363	2.9795e-300	3.29797e-298
ANKHD1	148.78	1.66714	0.169077	9.86023	6.19072e-23	3.2682e-22
PAIP2	1608.56	1.66657	0.0654063	25.4803	3.25745e-143	9.92719e-142
PALLD	181.471	1.66595	0.151855	10.9707	5.28627e-28	3.15562e-27
ZNF516	354.23	1.66573	0.111809	14.898	3.39536e-50	3.18958e-49
PSMB7	7236.98	1.66565	0.0423549	39.3259	0	0
YJU2	575.826	1.66485	0.089192	18.6659	9.38185e-78	1.36066e-76
TEN1-CDK3	19.4491	1.664	0.470933	3.53342	0.000410219	0.000971754
JARID2	1064.99	1.66323	0.0704382	23.6126	2.85874e-123	7.14411e-122
AP4B1	257.254	1.66321	0.12896	12.8971	4.6743e-38	3.46892e-37
RNF24	677.85	1.66257	0.0830182	20.0266	3.23066e-89	5.51752e-88
CA5B	63.122	1.66134	0.264556	6.27974	3.39145e-10	1.17867e-09
ZNF470	7.57225	1.65994	0.73576	2.25609	0.0240652	0.0445604
CLU	5109.79	1.65769	0.0471686	35.144	1.43748e-270	1.30239e-268
EPHB3	138.357	1.65505	0.175654	9.42224	4.41555e-21	2.21732e-20
HSPA2	226.797	1.65501	0.136675	12.109	9.45977e-34	6.44924e-33
DENND3	580.505	1.65338	0.0890624	18.5643	6.25211e-77	9.00073e-76
ZNF404	8.12523	1.65272	0.723328	2.28488	0.0223201	0.0415982
MAX	984.513	1.65271	0.0719603	22.9669	9.9856e-117	2.32693e-115
APC	1724.48	1.65188	0.0694026	23.8014	3.23135e-125	8.2331e-124
PLA2G15	1183.79	1.65152	0.0672275	24.5661	2.90981e-133	8.09024e-132
RAB2B	447.04	1.65109	0.104785	15.7569	6.15743e-56	6.39055e-55
C16orf72	1461.61	1.65059	0.0610339	27.0439	4.51077e-161	1.65909e-159
YRDC	551.745	1.64953	0.0990078	16.6606	2.53515e-62	2.94067e-61
SIRT1	1915.48	1.64789	0.0630379	26.1413	1.23837e-150	4.07569e-149
MTPN	5117	1.64762	0.0436902	37.7113	0	0
EDNRB	1191.65	1.64577	0.0708335	23.2344	2.04743e-119	4.88263e-118
FAM32A	4545.61	1.64577	0.0453326	36.3043	1.38289e-288	1.42328e-286
SEMA4D	355.466	1.6455	0.123613	13.3117	1.9804e-40	1.54598e-39
PRDM4	1024.97	1.6441	0.0696406	23.6083	3.16655e-123	7.89651e-122
KLHL15	444.938	1.64336	0.10197	16.1162	1.96415e-58	2.13383e-57
LPIN1	734.096	1.64235	0.079399	20.6848	4.74699e-95	8.70257e-94
IRF7	322.75	1.64173	0.123008	13.3465	1.24127e-40	9.71892e-40
MAPK6	3627.91	1.64124	0.0558709	29.3757	1.12414e-189	5.31835e-188
LGALS9	22.4766	1.64077	0.432025	3.79787	0.000145948	0.000360848
BRD4	2446.85	1.64077	0.0506259	32.4096	2.00723e-230	1.3535e-228
AMPD2	929.56	1.64062	0.07252	22.623	2.57632e-113	5.83551e-112
PMEPA1	86.474	1.64046	0.229178	7.15804	8.18387e-13	3.156e-12
RAPGEF2	4198.72	1.63921	0.0460376	35.606	1.13182e-277	1.07527e-275
P4HA3	15.4217	1.63818	0.533498	3.07064	0.00213598	0.00465783
TECTA	8.10923	1.63431	0.722948	2.26062	0.0237827	0.0441208
YWHAG	8408.08	1.63412	0.0377468	43.2917	0	0
MEGF9	140.193	1.63395	0.185889	8.78989	1.49703e-18	6.95079e-18
SLC26A3	9.8587	1.63261	0.691734	2.36017	0.0182667	0.0346634
DNAJC12	13.8046	1.63253	0.553763	2.94806	0.00319777	0.00682667
KIAA1614	17.3464	1.63184	0.491077	3.32298	0.000890618	0.00203023
ATP7A	158.505	1.63155	0.161414	10.1079	5.0987e-24	2.77216e-23
ALPG	87.9761	1.63006	0.215167	7.57578	3.56979e-14	1.44329e-13
HMBOX1	335.137	1.62995	0.115585	14.1017	3.70632e-45	3.16724e-44
PLIN2	2110.5	1.62958	0.0536229	30.3896	7.52721e-203	4.0053e-201
NRL	40.4534	1.62939	0.320656	5.08143	3.746e-07	1.11694e-06
VPS11	1952.32	1.62892	0.0583905	27.897	2.90077e-171	1.16757e-169
MED13	3583.12	1.62844	0.0508104	32.0493	2.24812e-225	1.43745e-223
SIPA1L2	378.07	1.62815	0.110538	14.7293	4.18128e-49	3.85078e-48
F2RL1	4395.61	1.62653	0.0440326	36.9392	1.08697e-298	1.18637e-296
RNMT	1889.41	1.62646	0.0619475	26.2554	6.20214e-152	2.06439e-150
VWF	13.1108	1.62518	0.5548	2.9293	0.00339722	0.00723273
TMEM87A	1219.73	1.62442	0.0690357	23.5302	2.00396e-122	4.95522e-121
TP53INP1	169.106	1.62347	0.164176	9.88864	4.66306e-23	2.46894e-22
CRKL	4636.39	1.62322	0.0443367	36.6113	1.89226e-293	2.00922e-291
ZNF24	1426.23	1.62314	0.0625296	25.9579	1.48115e-148	4.78083e-147
SHC1	1989.26	1.62224	0.0535971	30.2672	3.09689e-201	1.62214e-199
CCNK	726.172	1.62091	0.0816697	19.8471	1.16717e-87	1.95914e-86
RLIM	1668.7	1.62043	0.0615488	26.3275	9.28017e-153	3.11098e-151
CCDC28A	213.505	1.62014	0.139984	11.5738	5.59796e-31	3.57641e-30
CACTIN	811.889	1.62012	0.0803868	20.154	2.48071e-90	4.27717e-89
LRRC8A	1328.66	1.61928	0.0635145	25.4947	2.25981e-143	6.91378e-142
CIR1	997.076	1.61834	0.0755724	21.4144	9.80121e-102	1.95242e-100
SSNA1	1106.38	1.6169	0.0728113	22.2067	2.95747e-109	6.47389e-108
ABHD4	2697.78	1.61671	0.0562396	28.7468	9.92671e-182	4.35402e-180
KDM5C	3978.06	1.61539	0.0460656	35.0671	2.1426e-269	1.92637e-267
ATP6V1A	3313.23	1.61195	0.045261	35.6147	8.30988e-278	7.92681e-276
ZNF267	941.878	1.61187	0.0755643	21.3311	5.84586e-101	1.14987e-99
ADAT3	100.024	1.61021	0.203328	7.91929	2.38878e-15	1.00457e-14
PINK1	263.825	1.6096	0.127232	12.6509	1.10577e-36	7.98398e-36
USP35	528.385	1.60955	0.0933514	17.2418	1.2888e-66	1.60525e-65
NDUFV2	69.8067	1.60946	0.257343	6.25413	3.99729e-10	1.38431e-09
KIAA0895	147.785	1.60823	0.181529	8.85934	8.04888e-19	3.7662e-18
KAT7	3663.39	1.60715	0.0453644	35.4275	6.43709e-275	5.97047e-273
THAP1	181.637	1.60608	0.156469	10.2645	1.01859e-24	5.64795e-24
TBC1D23	1439.52	1.60596	0.068852	23.3248	2.48654e-120	6.01537e-119
ZNF384	1727	1.60412	0.0612904	26.1725	5.47055e-151	1.80806e-149
CTSL	1856.59	1.603	0.0612094	26.1888	3.56889e-151	1.18121e-149
ZNF71	20.0913	1.60189	0.451078	3.55125	0.000383401	0.000911817
GLIS3	51.1729	1.60175	0.285536	5.60961	2.02783e-08	6.48032e-08
BLCAP	3491.72	1.60097	0.046222	34.6365	7.12158e-263	6.16661e-261
FAM20A	12.7657	1.60094	0.57407	2.78876	0.00529103	0.0109687
CHMP2B	2170.43	1.60075	0.0676414	23.6652	8.24077e-124	2.07043e-122
FOXO1	334.687	1.59953	0.120714	13.2505	4.48232e-40	3.47021e-39
UTP11	1373.16	1.59857	0.0713803	22.3951	4.39812e-111	9.73644e-110
ULK4	88.381	1.59822	0.222421	7.18556	6.69309e-13	2.59132e-12
C1orf54	8.87517	1.59814	0.707663	2.25833	0.0239249	0.0443285
PGM2L1	483.793	1.5976	0.096653	16.5292	2.26184e-61	2.57902e-60
EPHA2	3251.49	1.59717	0.0488427	32.7003	1.5472e-234	1.09029e-232
HERPUD1	3321.05	1.59534	0.0481561	33.1285	1.15514e-240	8.49734e-239
EIF4A1	151.185	1.5946	0.166476	9.57857	9.8396e-22	5.0403e-21
ZNF460	63.8316	1.59456	0.257296	6.19739	5.74064e-10	1.97319e-09
AC068946.1	8.62188	1.5945	0.690306	2.30984	0.0208968	0.0391727
PLAA	705.801	1.59377	0.0849069	18.7708	1.30905e-78	1.92711e-77
TRMT112	2494.96	1.59353	0.0512559	31.0897	3.32002e-212	1.88638e-210
KLHL11	290.641	1.59181	0.124384	12.7975	1.69339e-37	1.24295e-36
HDAC5	578.366	1.59171	0.0937039	16.9865	1.03318e-64	1.24141e-63
C18orf25	586.945	1.58994	0.0904344	17.5811	3.43559e-69	4.42964e-68
CNKSR1	315.167	1.5886	0.118892	13.3616	1.01307e-40	7.95339e-40
ING4	342.778	1.58839	0.118977	13.3504	1.17806e-40	9.23019e-40
ZNF175	135.606	1.58685	0.182586	8.69095	3.59432e-18	1.65154e-17
ZNF90	63.8256	1.5861	0.251252	6.3128	2.74024e-10	9.56599e-10
IRF6	1780.11	1.58506	0.059133	26.8049	2.82989e-158	1.00463e-156
TNIP1	2541.79	1.58385	0.0553898	28.5946	7.85106e-180	3.38042e-178
CDC42EP4	937.86	1.58275	0.0735875	21.5084	1.29859e-102	2.62244e-101
PPP2R3C	446.619	1.5823	0.109604	14.4366	3.04599e-47	2.71158e-46
FAM241B	558.533	1.58168	0.0942354	16.7843	3.1784e-63	3.73669e-62
RABGEF1	48.6047	1.58066	0.291149	5.42905	5.66534e-08	1.77045e-07
SAP18	5152.9	1.58052	0.046916	33.6884	8.55652e-249	6.73783e-247
UCHL1	5370.26	1.58036	0.0396212	39.8867	0	0
RNF44	1817.86	1.57948	0.055552	28.4325	8.01401e-178	3.39453e-176
FAF2	4081.92	1.57894	0.0420529	37.5465	0	0
TFPI	2794.73	1.57819	0.057192	27.5946	1.29131e-167	5.01686e-166
INO80D	562.315	1.578	0.102689	15.3668	2.73135e-53	2.7101e-52
GRB7	1773.53	1.57665	0.0579079	27.2269	3.12145e-163	1.16637e-161
STOM	509.778	1.57639	0.0975185	16.165	8.8989e-59	9.7036e-58
RNF25	808.17	1.57525	0.0794643	19.8234	1.87087e-87	3.12468e-86
ADAM9	6856.53	1.57434	0.0399841	39.3741	0	0
SETD5	4619.94	1.57344	0.0512326	30.7117	3.97082e-207	2.17201e-205
TTF1	691.666	1.573	0.0855789	18.3807	1.87647e-75	2.63988e-74
MRPS24	30.7334	1.57266	0.36402	4.32024	1.55859e-05	4.1637e-05
EPC2	821.801	1.57252	0.0834349	18.8473	3.09438e-79	4.60156e-78
PCF11	4005.01	1.57192	0.0470399	33.4168	7.82912e-245	5.94557e-243
LBH	5998.14	1.57155	0.040573	38.7339	0	0
ELL2	2079.83	1.56971	0.0564777	27.7935	5.1937e-170	2.05871e-168
ASB6	801.966	1.56964	0.0769049	20.4102	1.35815e-92	2.41077e-91
SMURF2	788.997	1.56927	0.0797964	19.6659	4.22781e-86	6.92322e-85
ZFP82	141.992	1.5672	0.174571	8.97743	2.77168e-19	1.31714e-18
TDG	1305.76	1.5664	0.063436	24.6926	1.28346e-134	3.60258e-133
WDR26	2990.05	1.56604	0.0501901	31.2023	9.92674e-214	5.75163e-212
ZBTB20	104.086	1.56561	0.20335	7.69907	1.37064e-14	5.62005e-14
ZNF274	652.525	1.56487	0.0853588	18.3329	4.52354e-75	6.32218e-74
COQ10B	852.877	1.5646	0.0817799	19.1319	1.37104e-81	2.10143e-80
MMP21	21.0187	1.56368	0.440774	3.54756	0.00038881	0.000923651
ZNF567	404.404	1.56224	0.105176	14.8536	6.59627e-50	6.15215e-49
ALOXE3	17.1556	1.56153	0.490291	3.18491	0.00144801	0.0032284
GIPR	30.6637	1.56141	0.368109	4.2417	2.21832e-05	5.85482e-05
BBIP1	275.104	1.56094	0.133893	11.6581	2.0858e-31	1.3454e-30
HELZ	2179.35	1.56037	0.0531708	29.3464	2.65951e-189	1.24567e-187
GNA13	1389.35	1.55885	0.0702036	22.2047	3.09482e-109	6.76822e-108
ZUP1	622.807	1.5586	0.0935725	16.6566	2.70944e-62	3.14129e-61
TNFSF15	22.5599	1.55767	0.422347	3.68814	0.000225898	0.000548919
FLYWCH1	545.225	1.55755	0.0912512	17.0688	2.5343e-65	3.08613e-64
DUSP6	765.281	1.55675	0.0832988	18.6887	6.11873e-78	8.91815e-77
C9orf85	56.0527	1.55589	0.267074	5.82567	5.68829e-09	1.86687e-08
ATXN7L2	163.83	1.55566	0.161193	9.65089	4.87311e-22	2.51601e-21
NFE2L2	4258.16	1.55556	0.0484112	32.1323	1.56321e-226	1.005e-224
UBXN6	932.653	1.55528	0.0747069	20.8184	2.95106e-96	5.48294e-95
OGFOD2	36.3706	1.55496	0.333818	4.65812	3.19106e-06	8.96999e-06
PLEC	6749.41	1.55489	0.0480329	32.3713	6.95623e-230	4.65057e-228
ABI1	3522.57	1.55302	0.0475901	32.6333	1.38117e-233	9.58893e-232
MIDN	2250.3	1.55107	0.0536754	28.8972	1.29289e-183	5.7569e-182
SLC16A3	262.444	1.5502	0.128911	12.0253	2.61493e-33	1.76176e-32
PP2D1	13.0116	1.54996	0.578951	2.67719	0.00742418	0.0150836
NDEL1	966.387	1.54954	0.0759472	20.4029	1.57648e-92	2.79197e-91
ABCC2	8404.17	1.54917	0.0389503	39.773	0	0
AZI2	589.186	1.5489	0.0906126	17.0936	1.65513e-65	2.02498e-64
KDM5A	2944.3	1.54874	0.0502134	30.8431	6.93289e-209	3.8735e-207
HAL	9.5431	1.54871	0.640167	2.41923	0.0155536	0.0299409
TDP2	1453.13	1.54795	0.0613377	25.2366	1.5899e-140	4.76481e-139
PLK3	161.729	1.54791	0.164369	9.41727	4.62983e-21	2.32343e-20
ALKBH8	939.286	1.54469	0.0745598	20.7174	2.4125e-95	4.43665e-94
ZRSR2	330.979	1.54339	0.118684	13.0042	1.15817e-38	8.7136e-38
MED6	990.092	1.54327	0.0704642	21.9014	2.51713e-106	5.36485e-105
MTMR14	1257.15	1.54306	0.0706457	21.8422	9.21735e-106	1.9486e-104
RETREG3	1137.7	1.5397	0.0695605	22.1347	1.46523e-108	3.18658e-107
SF3B4	3210.62	1.53965	0.0461309	33.3755	3.10432e-244	2.34231e-242
ABCF3	1898.59	1.5389	0.056321	27.3237	2.21609e-164	8.33378e-163
SON	11703.4	1.53777	0.039915	38.5262	0	0
ERCC6	1247.47	1.53761	0.0655067	23.4725	7.7835e-122	1.91656e-120
RELT	507.176	1.53751	0.0929337	16.5442	1.7624e-61	2.01346e-60
SGTB	570.169	1.53697	0.0959485	16.0186	9.46854e-58	1.01735e-56
PLEKHH3	358.992	1.53605	0.115135	13.3413	1.3318e-40	1.04208e-39
ZNF77	185.412	1.53568	0.155408	9.88161	5.00218e-23	2.64491e-22
CCRL2	41.0608	1.5353	0.331837	4.62668	3.7157e-06	1.03862e-05
TBX19	106.968	1.53512	0.194352	7.89863	2.81987e-15	1.18226e-14
RBM39	17752.6	1.53492	0.0376822	40.7333	0	0
STK17B	1343.76	1.5346	0.071717	21.3981	1.39279e-101	2.76742e-100
LEMD3	1254.12	1.53395	0.0706797	21.7029	1.92568e-104	3.98131e-103
SLC25A51	223.825	1.53213	0.146952	10.426	1.88586e-25	1.06456e-24
SLC35E4	20.9333	1.53158	0.481456	3.18115	0.00146694	0.00326781
HCN2	80.1341	1.5301	0.229155	6.67713	2.4367e-11	8.88157e-11
TFG	4658.53	1.52927	0.0450742	33.9278	2.59486e-252	2.12164e-250
PTTG1IP	13055.3	1.52887	0.0335534	45.5652	0	0
DNAJC25	459.575	1.52852	0.0986849	15.4889	4.12402e-54	4.13389e-53
AAR2	3177.82	1.52769	0.0489368	31.2177	6.1374e-214	3.56486e-212
MAP2K1	2332.77	1.52768	0.0526998	28.9884	9.21668e-185	4.13535e-183
TIPARP	802.629	1.5276	0.0774662	19.7196	1.46482e-86	2.41556e-85
LARP4	4593.92	1.52741	0.0490585	31.1344	8.24713e-213	4.73172e-211
VDAC2	3468.24	1.52726	0.0444291	34.3751	5.93303e-259	4.99012e-257
CCN1	3917.61	1.52529	0.0466623	32.6879	2.32219e-234	1.63151e-232
ACIN1	9011.87	1.52438	0.0432642	35.2342	5.98321e-272	5.46311e-270
AP1G1	8016.47	1.52425	0.0416068	36.6345	8.06979e-294	8.60753e-292
ZGPAT	383.682	1.52411	0.106691	14.2853	2.70344e-46	2.35833e-45
PLAG1	27.1635	1.52406	0.406179	3.75219	0.000175297	0.000430329
NOSIP	1521.43	1.52263	0.0608198	25.0351	2.54009e-138	7.43214e-137
MFAP4	9.37512	1.52247	0.648451	2.34786	0.0188814	0.0357089
FXR1	4137.91	1.52185	0.0441475	34.4719	2.11561e-260	1.81185e-258
CNNM4	1309.98	1.52163	0.063845	23.8333	1.51056e-125	3.8613e-124
ITGB6	36.275	1.52025	0.342653	4.43671	9.13446e-06	2.48147e-05
FXR2	771.662	1.51945	0.0820783	18.5122	1.64742e-76	2.35149e-75
DNAJA2	2719.42	1.51905	0.051719	29.3712	1.28325e-189	6.05888e-188
TRIM23	434.195	1.51783	0.102501	14.808	1.30077e-49	1.2079e-48
RICTOR	1036.46	1.5177	0.0828071	18.3281	4.93643e-75	6.89103e-74
PPP6R1	4466.92	1.5167	0.0457677	33.1391	8.13308e-241	6.02053e-239
PSMC2	6526.3	1.51635	0.0386273	39.256	0	0
CYB5D1	8.77457	1.51564	0.667826	2.26951	0.0232372	0.0431909
PBXIP1	649.556	1.51481	0.092667	16.3468	4.58542e-60	5.119e-59
FOXD4	8.73424	1.51448	0.66986	2.2609	0.0237657	0.0440929
RNASEL	228.613	1.51277	0.140394	10.7751	4.51212e-27	2.63978e-26
BCL2L11	545.383	1.51215	0.0981722	15.4031	1.56087e-53	1.55332e-52
WNT2B	12.1894	1.5113	0.568191	2.65985	0.00781761	0.0158418
ZNF721	535.973	1.51092	0.0927741	16.286	1.24017e-59	1.37337e-58
AKAP8	1961.06	1.5102	0.056637	26.6646	1.21351e-156	4.23124e-155
CEP76	1525.56	1.51	0.062325	24.2278	1.13296e-129	3.0384e-128
LMBRD1	803.723	1.50963	0.0837391	18.0277	1.18059e-72	1.59768e-71
RBM33	2568.84	1.50936	0.0491339	30.7193	3.14226e-207	1.72685e-205
MARCHF8	525.3	1.50841	0.0948141	15.9091	5.47798e-57	5.80345e-56
HSD17B2	114.492	1.50801	0.191495	7.87492	3.40964e-15	1.42596e-14
IGFBP6	745.869	1.50584	0.0878798	17.1352	8.10636e-66	9.97503e-65
SCNM1	844.32	1.50544	0.0793919	18.9622	3.50462e-80	5.28191e-79
MTURN	67.0305	1.50544	0.255814	5.8849	3.98303e-09	1.31865e-08
VWA5A	14.5333	1.50538	0.550395	2.73509	0.00623634	0.0128067
DDA1	1228.89	1.50421	0.0664054	22.6519	1.33495e-113	3.02665e-112
PSEN1	3402.28	1.50397	0.0468593	32.0953	5.11995e-226	3.28264e-224
RNASEK	43.5808	1.50218	0.303575	4.94831	7.48614e-07	2.18985e-06
ARHGAP19	723.532	1.50107	0.0854591	17.5648	4.5837e-69	5.90023e-68
IGSF6	11.1859	1.50065	0.623618	2.40636	0.0161123	0.0308948
MICB	395.474	1.50034	0.107561	13.9487	3.20269e-44	2.68889e-43
TLE4	260.427	1.49988	0.127128	11.7982	3.98566e-32	2.61616e-31
RUBCN	277.553	1.49963	0.123469	12.1458	6.04033e-34	4.13846e-33
MAPT	9.23275	1.49928	0.673943	2.22464	0.0261057	0.0480317
TMEM159	245.76	1.49715	0.133274	11.2337	2.78698e-29	1.71337e-28
ASB3	346.319	1.49643	0.120612	12.407	2.39571e-35	1.68216e-34
ZNF211	279.765	1.49432	0.135291	11.0452	2.31238e-28	1.39027e-27
HNRNPH1	17691.5	1.49176	0.0421567	35.3861	2.79376e-274	2.57092e-272
NAGPA	532.072	1.49153	0.0948735	15.7213	1.08144e-55	1.11744e-54
RNF111	1014.34	1.49113	0.0789173	18.8948	1.25884e-79	1.88153e-78
KEAP1	2215.29	1.4907	0.0545797	27.3124	3.01907e-164	1.13353e-162
KIAA0753	445.175	1.48784	0.100151	14.856	6.36469e-50	5.94088e-49
ENO2	585.916	1.4877	0.0911725	16.3175	7.41519e-60	8.24667e-59
PROZ	16.146	1.48734	0.509431	2.91962	0.00350462	0.00744517
PRSS22	1771.69	1.48697	0.0580521	25.6144	1.05488e-144	3.27865e-143
NHEJ1	9.84654	1.48552	0.634687	2.34056	0.0192551	0.0363478
CD59	2117.08	1.48352	0.0533736	27.795	4.99078e-170	1.98162e-168
ZNF277	457.042	1.4826	0.104558	14.1796	1.22537e-45	1.05676e-44
CHD8	4061.58	1.48237	0.0495066	29.9429	5.44409e-197	2.74144e-195
SLC22A18AS	13.847	1.48182	0.544887	2.71949	0.00653819	0.0133926
ZFP14	72.4836	1.48111	0.236023	6.27527	3.49027e-10	1.21212e-09
USF1	1101.65	1.4789	0.0783024	18.8871	1.45672e-79	2.17313e-78
ARF4	7635.25	1.47868	0.0411315	35.95	5.06698e-283	4.97497e-281
HSPA1L	81.3475	1.47722	0.229777	6.42892	1.2851e-10	4.5409e-10
DCAF15	1086.05	1.47719	0.0692235	21.3394	4.89566e-101	9.65392e-100
GRB2	4336.66	1.47699	0.0460882	32.0471	2.40717e-225	1.53496e-223
TNRC6A	2711.09	1.47659	0.0510548	28.9217	6.37499e-184	2.84944e-182
PBX4	61.0901	1.47655	0.259057	5.69972	1.20005e-08	3.87831e-08
WASHC2C	1269.98	1.47634	0.0646052	22.8518	1.40327e-115	3.23469e-114
EGLN2	352.782	1.47591	0.112986	13.0627	5.37781e-39	4.06558e-38
RAP2B	826.98	1.47481	0.0799797	18.4398	6.29689e-76	8.89066e-75
ATXN3	311.63	1.47473	0.118169	12.4799	9.61186e-36	6.81838e-35
POLDIP3	4174.02	1.47387	0.0444879	33.1297	1.11003e-240	8.19119e-239
GATA2	342.895	1.47339	0.11473	12.8423	9.5045e-38	7.0048e-37
ZNF292	1421.82	1.47193	0.0743001	19.8106	2.41028e-87	4.01703e-86
RYR3	77.2201	1.47189	0.247137	5.95575	2.58874e-09	8.65224e-09
SLC30A7	336.802	1.47023	0.133445	11.0175	3.14561e-28	1.8864e-27
TUBB2A	1598.25	1.47009	0.0609838	24.1062	2.15154e-128	5.67919e-127
SAFB	5214.34	1.46952	0.0498422	29.4834	4.69935e-191	2.25511e-189
SERTAD2	1545.34	1.46812	0.0678967	21.6228	1.09593e-103	2.24016e-102
DLST	3649.61	1.46807	0.0444037	33.0618	1.05378e-239	7.67954e-238
ATP6V1E1	4981.82	1.46718	0.0483935	30.3176	6.7133e-202	3.52426e-200
PSMD13	7554.99	1.4661	0.0400534	36.6037	2.49467e-293	2.63694e-291
MTRNR2L1	35.1385	1.46605	0.349988	4.18886	2.80358e-05	7.34824e-05
FGFBP1	37.7941	1.46581	0.324681	4.51462	6.3431e-06	1.74274e-05
SCML1	844.827	1.4656	0.0843033	17.3848	1.07567e-67	1.35635e-66
ALDH3A2	3340.27	1.46412	0.0474179	30.8769	2.43809e-209	1.36871e-207
NFKBIA	969.88	1.46411	0.0700773	20.8928	6.22623e-97	1.16604e-95
CCDC88B	38.6095	1.46409	0.32945	4.44403	8.82886e-06	2.40318e-05
ICAM5	38.8184	1.46145	0.336832	4.33881	1.43254e-05	3.83919e-05
AKAP13	1848.61	1.45971	0.059506	24.5305	6.98784e-133	1.93597e-131
UBXN7	1863.23	1.45957	0.0619593	23.5569	1.06624e-122	2.64208e-121
RBM5	2458.12	1.45896	0.0533405	27.3518	1.02784e-164	3.8777e-163
ZXDB	191.909	1.45879	0.152129	9.58918	8.8789e-22	4.55714e-21
ARMC5	402.193	1.45814	0.103347	14.1091	3.33696e-45	2.85472e-44
THAP3	320.419	1.45801	0.115401	12.6343	1.36641e-36	9.84773e-36
SAFB2	2400.07	1.45765	0.0545529	26.7199	2.76593e-157	9.70183e-156
MRTFA	921.948	1.45691	0.0804235	18.1155	2.40517e-73	3.28328e-72
TSSC4	1086.06	1.45589	0.0721258	20.1854	1.31621e-90	2.27942e-89
BUD31	1837.31	1.45572	0.0582339	24.9978	6.45348e-138	1.87888e-136
TXNL4B	805.274	1.45401	0.0769618	18.8927	1.31079e-79	1.95793e-78
UBR3	1682.26	1.45385	0.0579274	25.0978	5.24969e-139	1.54179e-137
HRNR	40.6319	1.45332	0.313661	4.63341	3.59698e-06	1.00652e-05
PSMA5	3669.93	1.45326	0.0450995	32.2233	8.32542e-228	5.4466e-226
DDIT3	488.668	1.45277	0.0990516	14.6668	1.05197e-48	9.61271e-48
MAP3K8	574.646	1.45269	0.0912929	15.9124	5.20104e-57	5.51752e-56
RYBP	1392.71	1.45136	0.0670803	21.6361	8.21176e-104	1.68294e-102
MOAP1	436.033	1.45117	0.103228	14.0579	6.88988e-45	5.86214e-44
CASP10	222.899	1.45043	0.139135	10.4246	1.91448e-25	1.08019e-24
RNF181	1331.02	1.45003	0.0612869	23.6596	9.39301e-124	2.35739e-122
YTHDF3	2048.99	1.44966	0.061804	23.4557	1.15614e-121	2.83787e-120
TOPORS	925.195	1.44956	0.0743905	19.4858	1.44779e-84	2.31587e-83
ZNF350	45.2616	1.44856	0.304587	4.75581	1.97653e-06	5.6247e-06
BROX	712.141	1.44843	0.0874527	16.5624	1.30231e-61	1.48928e-60
FHL2	2398.05	1.44758	0.0533437	27.137	3.60909e-162	1.34005e-160
CDC40	1135.95	1.44699	0.0675253	21.4289	7.18367e-102	1.43833e-100
CAMLG	675.842	1.44692	0.0827315	17.4893	1.72868e-68	2.20943e-67
KIAA0825	12.3309	1.44628	0.580744	2.49039	0.0127602	0.0249797
DOCK4	30.6257	1.44525	0.367025	3.93775	8.22484e-05	0.00020771
TXN	9149.4	1.44377	0.0442065	32.6596	5.8532e-234	4.10003e-232
NCOA4	10858.9	1.44368	0.0414659	34.816	1.39178e-265	1.21411e-263
MAST4	739.991	1.44367	0.085132	16.9581	1.67799e-64	2.00896e-63
CCDC189	13.5344	1.44362	0.553219	2.6095	0.00906747	0.0181783
OTUD5	1370.82	1.44324	0.0655549	22.0158	2.0319e-107	4.37838e-106
MON1B	1995.85	1.44308	0.0573086	25.1808	6.49853e-140	1.93521e-138
FSCN1	2146.57	1.44298	0.0527394	27.3606	8.07736e-165	3.05223e-163
SAR1A	7123.19	1.44267	0.0446798	32.2891	9.9522e-229	6.59712e-227
ENKUR	24.2511	1.4424	0.405691	3.55541	0.000377389	0.000898337
SSBP2	11.6668	1.44187	0.586751	2.45738	0.0139953	0.0272046
GLCCI1	358.898	1.4407	0.109552	13.1509	1.6826e-39	1.28738e-38
CD200R1	11.8716	1.44045	0.603636	2.3863	0.017019	0.0324953
CD44	1528	1.44013	0.0602282	23.9113	2.33674e-126	6.0523e-125
UBFD1	3586.39	1.43897	0.0446563	32.2233	8.3326e-228	5.4466e-226
GABPA	541.788	1.43876	0.093043	15.4634	6.12646e-54	6.1228e-53
ARHGEF7	2022.02	1.43816	0.0537496	26.7566	1.03349e-157	3.66342e-156
PSMB6	2984.45	1.43815	0.0485749	29.6068	1.22074e-192	5.95546e-191
FAM24B	129.543	1.43811	0.177139	8.11854	4.7184e-16	2.02899e-15
EAPP	809.326	1.43788	0.0763146	18.8415	3.4488e-79	5.12213e-78
PITHD1	1341.87	1.43782	0.0657933	21.8536	7.18348e-106	1.52e-104
TUBB4B	15630.4	1.43765	0.0393056	36.5761	6.8538e-293	7.21217e-291
GTF3C5	1864.81	1.4376	0.055026	26.1258	1.85877e-150	6.10039e-149
AHSA1	6349.76	1.43743	0.042653	33.7005	5.67696e-249	4.48537e-247
MBTD1	793.687	1.43712	0.0773954	18.5685	5.77989e-77	8.32602e-76
RAB7A	8796.63	1.43711	0.0397429	36.1603	2.56208e-286	2.58033e-284
UBE4B	2045.06	1.43665	0.0555363	25.8686	1.5016e-147	4.79327e-146
PDRG1	2419.36	1.43631	0.0556479	25.8107	6.71887e-147	2.12486e-145
RNASE1	32.6714	1.43601	0.360061	3.98823	6.65686e-05	0.000169462
ELMO2	2357.7	1.43585	0.0520879	27.5659	2.85696e-167	1.10084e-165
PAPOLG	626.852	1.43489	0.0897353	15.9903	1.49393e-57	1.60076e-56
ZNF92	553.17	1.43451	0.1128	12.7173	4.73878e-37	3.4406e-36
TTC39C	98.1949	1.43438	0.201987	7.10137	1.23529e-12	4.72721e-12
PSMB2	4304.88	1.43256	0.0436563	32.8144	3.66798e-236	2.61619e-234
GATAD2B	630.231	1.43181	0.0849767	16.8494	1.05956e-63	1.25006e-62
MTMR3	124.073	1.43144	0.184968	7.73883	1.00332e-14	4.13342e-14
PIP4P1	1115.16	1.43128	0.0684129	20.9212	3.4345e-97	6.47341e-96
RHPN2	3589.49	1.43093	0.0449671	31.8218	3.23513e-222	2.01903e-220
[truncated: 3,835 more rows]
